# Supplementary material for: Transcriptomic and metabolomic differences between banana varieties which are resistant or susceptible to Fusarium wilt
Source: PeerJ. 2023 Dec 12;11:e16549. doi: 10.7717/peerj.16549 (PMC10722978; doi:10.7717/peerj.16549)
Supplement: Supplemental Information 13 [file peerj-11-16549-s013.xlsx]

## Sheet: Table S1
Table S1 Sequencing data statistics of all samples
Sample ID	Raw Reads	Clean Reads	reads_mapped	Raw Base(G)	Clean Base(G)	Effective Rate(%)	Error Rate(%)	Q20 (%)	Q30 (%)	GC Content (%)	reads_mapped
G1T0-1	21838261	20422746	0.917	6.55	6.13	93.52	0.03	96.8	91.47	50.3	0.917
G1T0-2	22508708	21401104	0.9131	6.75	6.42	95.08	0.03	97.02	92.06	51	0.9131
G1T0-3	22135745	21109683	0.9023	6.64	6.33	95.36	0.03	96.88	91.72	49.7	0.9023
G1T7-1	23045776	21117995	0.9099	6.91	6.34	91.63	0.03	96.69	91.42	51.57	0.9099
G1T7-2	21454651	20525493	0.9163	6.44	6.16	95.67	0.03	96.93	91.73	47.19	0.9163
G1T7-3	22580138	21397125	0.9131	6.77	6.42	94.76	0.03	96.84	91.66	50.22	0.9131
G1T3-1	25258302	24928422	0.9193	7.58	7.48	98.69	0.03	96.8	91.45	47.86	0.9193
G1T3-2	23309694	22299610	0.9113	6.99	6.69	95.67	0.03	96.77	91.54	51.06	0.9113
G1T3-3	23575889	22390036	0.9095	7.07	6.72	94.97	0.03	96.72	91.44	51.36	0.9095
G9T0-1	22312056	21664236	0.9222	6.69	6.5	97.1	0.03	97.06	92.02	48.28	0.9222
G9T0-2	22315299	21852080	0.9196	6.69	6.56	97.92	0.03	96.75	91.36	48.63	0.9196
G9T0-3	23317619	22970415	0.9185	7	6.89	98.51	0.03	96.75	91.38	48.8	0.9185
G9T7-1	22877738	22237031	0.9217	6.86	6.67	97.2	0.03	96.89	91.78	49.47	0.9217
G9T7-2	22326677	21799080	0.9055	6.7	6.54	97.64	0.03	96.86	91.66	49.66	0.9055
G9T7-3	24054484	23606137	0.9237	7.22	7.08	98.14	0.03	96.72	91.19	48.59	0.9237
G9T3-1	21101666	20059854	0.9101	6.33	6.02	95.06	0.03	96.69	91.36	51.02	0.9101
G9T3-2	22697822	21390919	0.9117	6.81	6.42	94.24	0.03	96.86	91.72	51.16	0.9117
G9T3-3	23201715	21472864	0.9111	6.96	6.44	92.55	0.03	96.59	91.25	50.93	0.9111

## Sheet: Table S2
Table S2 All gene FPKM value
ID	G1T0-1	G1T0-2	G1T0-3	G1T7-1	G1T7-2	G1T7-3	G1T3-1	G1T3-2	G1T3-3	G9T0-1	G9T0-2	G9T0-3	G9T7-1	G9T7-2	G9T7-3	G9T3-1	G9T3-2	G9T3-3
Macma4_01_g00010	2.55951	0.627877	2.25783	2.91909	0	2.76793	1.91795	1.5072	3.79695	1.76264	1.76683	0	2.52863	2.16558	1.25921	2.35913	2.15038	2.66262
Macma4_01_g00020	1.20148	0.22842	1.25165	0.568566	0.723346	1.05218	1.29107	0.825088	0.947192	1.13645	1.11786	0.859754	0.814262	1.33986	1.28946	0.712288	1.36869	0.955089
Macma4_01_g00030	0	0	0	0	0	0	0	0	0	0	0	0	0	0	0	0	0	0
Macma4_01_g00040	11.7859	9.37874	11.8887	11.8658	15.0914	11.8258	15.0206	10.3929	10.3905	12.5112	11.4538	12.6315	14.1873	13.1234	13.729	10.4819	11.8865	12.0666
Macma4_01_g00050	9.22059	3.41929	5.0799	5.90607	5.27707	7.2426	6.5989	4.55482	6.75655	13.8841	4.48976	5.01573	7.35865	7.70005	11.2036	7.80664	5.07029	6.05471
Macma4_01_g00060	9.74137	7.42112	9.42311	7.75694	9.99205	9.97037	10.7757	8.02954	7.23336	14.4286	13.4451	5.649	7.43669	8.38094	8.77083	7.5437	6.37557	10.4519
Macma4_01_g00070	4.79701	46.3138	98.9265	0.220904	9.6874	4.76085	0	5.53898	0	0.590101	8.71122	0	0	0.270698	0	0	1.17076	0.0548186
Macma4_01_g00080	1.41655	0.886748	1.64467	1.1885	2.18407	2.36617	1.71982	1.97094	1.20754	1.13846	1.7037	1.80189	1.91396	2.23315	1.33196	1.18111	0.866518	1.21251
Macma4_01_g00090	4.30355	4.00445	4.17455	3.82264	4.32515	4.12211	6.38641	3.78971	3.73519	4.36024	4.22961	3.8845	4.83195	4.51395	3.3382	5.44315	4.94063	4.97301
Macma4_01_g00100	0	0.123289	0	0.49573	0	0.49692	0.538008	0.236762	1.07361	0	0	0	0.350482	0.364483	0.659351	0.397059	0.500439	0.246036
Macma4_01_g00110	3.97592	7.64887	8.0538	8.05063	5.62156	7.88861	7.38246	5.78909	3.91806	4.83273	4.93228	8.53528	2.8992	6.03003	4.8125	2.70487	6.66605	12.5705
Macma4_01_g00120	3.45937	3.1074	6.9753	1.78926	0.942342	5.10708	3.92321	2.23053	1.54709	2.59235	4.84268	1.9638	1.25786	1.87298	1.88235	2.39663	2.84715	2.64904
Macma4_01_g00130	0.018071	0.154601	0.219632	0.43169	0.519253	0.951999	0.314836	0.247411	0.116345	0.201281	0.285826	0.111817	0.309275	0.490909	0.244981	0.0553225	0.575244	0.428505
Macma4_01_g00140	3.61429	1.68968	3.78065	1.72681	1.27689	3.03626	1.91709	1.29793	2.31607	5.55463	3.19736	1.17843	0.69382	2.35887	2.56032	4.53476	5.7726	3.25954
Macma4_01_g00150	1.39363	1.11727	1.30946	1.1231	0.739781	1.28662	0.849735	0.996161	1.29723	1.21564	1.21853	0.564003	1.04359	1.2111	1.20926	1.66204	1.40911	0.844073
Macma4_01_g00160	13.1844	25.7823	10.0328	13.5364	22.5692	13.7872	20.2617	17.1387	19.3827	21.595	18.8079	23.1382	21.9358	20.0201	23.248	15.4938	12.6841	15.931
Macma4_01_g00170	16.369	7.25022	6.7296	10.876	28.1675	13.4451	14.4685	9.88011	12.6945	25.3228	8.52922	6.37899	14.3482	16.3366	21.3383	14.4289	9.08343	13.4113
Macma4_01_g00180	16.4314	8.3566	13.4489	9.93954	13.9086	13.5454	14.9494	10.4605	12.9009	22.2152	9.75295	8.4625	12.6968	13.3225	14.9653	11.7656	8.62431	12.7802
Macma4_01_g00190	7.08781	3.58229	2.95742	5.81882	9.13132	5.35469	7.51597	4.21418	5.48607	9.35871	3.99387	4.34599	5.01314	5.28353	7.50677	8.40441	5.32039	5.37347
Macma4_01_g00200	0.436336	0.276515	0	0.486428	0.069654	0.696566	0.241332	0.464638	0.40132	0	0.135323	0.128567	0.131012	0.0681226	0.369702	0.0742112	0.0701498	0.689771
Macma4_01_g00210	10.5953	13.1227	12.4834	10.854	19.2679	14.5601	13.3536	11.5548	9.88771	14.1649	19.8269	17.1811	13.1013	13.267	14.5072	12.042	12.3497	12.7205
Macma4_01_g00220	5.45633	1.89621	1.33701	3.86828	2.95021	4.63623	2.53108	2.24913	3.56149	5.20071	2.04701	4.40825	7.21376	6.65005	6.7855	5.23873	4.188	2.83807
Macma4_01_g00230	3.34278	3.68416	5.839	3.10159	1.85607	2.18097	1.64789	1.94562	1.55954	3.86721	4.01162	2.86921	1.83282	3.67592	3.89954	3.0157	1.54216	3.17061
Macma4_01_g00240	173.257	49.97	40.4691	115.387	167.408	127.595	166.059	87.0963	152.678	254.07	43.6395	105.921	168.977	158.857	210.497	157.838	122.352	111.304
Macma4_01_g00250	5.7226	9.74371	24.1832	6.02341	5.35513	6.33189	4.24742	5.3033	3.0955	7.85564	14.137	6.09541	2.44898	3.02947	2.14569	3.64704	13.3985	6.29092
Macma4_01_g00260	6.90307	5.17591	6.06859	5.55125	10.3214	7.57219	7.61709	5.65608	7.37584	6.34398	5.27801	6.90753	6.87472	9.56091	5.77167	5.55645	7.42802	7.21741
Macma4_01_g00270	0.267108	0.761725	1.05207	0.538827	0.426395	0.710686	0.172356	0.487601	0.354861	0.495859	0.745555	0.314815	0.267335	0.500425	0.201171	0.666296	0.486688	0.731903
Macma4_01_g00280	0.808662	0.896816	1.73556	0.551938	0.608566	1.18029	1.83696	0.421771	0.318757	0.875699	1.75556	0.459527	0.693727	0.432863	0.929873	0.726974	0.910062	1.31488
Macma4_01_g00290	1.06068	0.94895	2.33813	1.78857	0	1.43429	1.75994	1.36676	0.688628	1.73738	1.91566	1.1582	0.449609	1.22737	0.475781	0.573028	0.722224	1.00605
Macma4_01_g00300	2.37057	3.54109	0.533547	1.33035	0.973087	3.09958	4.68261	5.82141	6.6102	0.419116	1.54041	7.33414	4.49095	2.00913	4.09681	4.2622	9.07421	3.97944
Macma4_01_g00310	65.1206	69.9654	59.0828	73.1544	71.9645	64.7338	56.7046	69.7774	78.618	59.9877	74.1826	80.4438	67.9253	67.8192	66.8138	77.0637	62.0777	69.4485
Macma4_01_g00320	40.9354	48.2731	32.1371	53.1163	71.3081	49.5758	50.7939	58.4875	57.6021	46.8715	42.9551	65.1371	64.0833	61.8973	56.5707	52.963	40.1296	45.8434
Macma4_01_g00330	2.59528	3.47506	4.83316	5.85312	3.78211	3.47486	3.3686	2.86551	2.64368	4.72722	5.66017	1.67741	2.33774	4.57469	3.26296	2.42059	1.80357	4.34091
Macma4_01_g00340	0	0.710043	0.939145	0.46763	0.690767	0.518095	0.470116	0.399662	0.213211	0.454247	1.84527	0.227681	0.580027	0.79622	0.130942	0.18399	0.198767	0.757346
Macma4_01_g00350	5.1821	9.61745	7.12302	14.9731	5.79067	8.74543	3.78742	8.55889	6.80891	2.86311	11.0204	3.81728	5.00126	6.12568	4.18165	6.29544	32.1349	7.25577
Macma4_01_g00360	14.1051	11.6308	8.00586	11.3071	9.67905	12.6036	15.4914	11.3838	15.8681	20.1437	10.0848	17.1333	16.6278	16.2279	19.0695	14.9009	16.9391	14.5458
Macma4_01_g00370	43.638	30.6497	31.496	39.6603	40.882	37.0727	34.4606	37.0702	38.6137	52.086	30.6506	27.601	34.6342	33.543	39.536	46.0253	37.2123	41.6622
Macma4_01_g00380	10.8348	16.6398	26.0788	15.9594	23.2368	17.218	35.8489	25.769	14.5344	12.5313	24.0563	18.4451	13.2507	19.7874	12.6364	37.8458	48.147	14.3996
Macma4_01_g00390	0	0	0	0	0	0	0	0	0	0	0	0	0	0	0	0	0	0
Macma4_01_g00400	0	0.396397	0.281567	0.265644	0.399408	0.0665706	0	0.190308	0	0.129021	0	0	0	0	0	0	0.0670419	0
Macma4_01_g00410	0	0	0	0	0	0	0	0	0	0	0	0	0	0	0	0	0	0
Macma4_01_g00420	0.107482	0	0	0	0.102947	0.180164	0	0	0	0	0.150003	0	0	0.100684	0	0	0.02592	0.0254866
Macma4_01_g00430	2.62162	4.46691	8.01579	4.15937	0.994922	2.27419	4.59617	2.6186	1.22836	1.01008	3.12949	1.48663	2.09412	0.834042	1.04777	3.7353	8.35004	1.54826
Macma4_01_g00440	19.5776	18.4442	15.2337	14.8391	7.35351	17.3483	17.1107	17.1685	15.6634	19.9858	19.5787	14.7144	17.1632	16.4759	15.6416	14.316	11.8494	15.0937
Macma4_01_g00450	1.03996	0.287004	0	1.41046	0.706896	1.09252	0	0.489918	1.11078	4.048	0.561824	0.711699	1.39003	1.44556	2.52975	2.4306	1.19733	2.00462
Macma4_01_g00460	15.6357	16.2509	13.332	10.958	15.3143	15.4953	15.7655	13.1537	16.2652	19.3872	14.7447	10.4492	14.4023	15.7937	14.9638	13.721	10.7441	13.669
Macma4_01_g00470	16.6961	32.6566	32.0666	17.4043	14.9883	15.7875	20.875	22.7125	12.3283	7.95702	28.8008	17.7632	14.4808	15.6801	11.1396	12.6966	15.9199	17.6409
Macma4_01_g00480	16.4633	14.7376	14.5261	19.9457	5.96561	15.3499	13.3931	19.2059	11.8907	7.87496	11.7309	15.5944	8.64296	10.6282	5.73369	14.2579	12.8443	13.7951
Macma4_01_g00490	16.3991	32.1891	32.6308	42.9425	28.3331	50.2045	34.314	31.857	19.7548	11.0458	33.5086	18.0025	22.3537	23.2919	13.7308	32.7044	68.0588	23.7217
Macma4_01_g00500	39.8577	46.0087	47.507	38.2899	36.7184	42.5243	59.1355	44.2259	44.099	41.9518	44.3862	45.828	47.6133	44.7138	53.2464	51.6524	43.804	41.7297
Macma4_01_g00510	0.142921	0.203788	0.144754	0.0682839	0.410671	0.205343	0	0	0	0	0	0	0	0	0	0	0.137865	0.13556
Macma4_01_g00520	7.03177	3.54489	3.99999	4.47068	7.26226	4.40233	4.68071	3.66753	4.51837	6.60351	4.1482	3.35724	4.85893	4.07336	4.34894	5.01316	3.75653	4.67264
Macma4_01_g00530	5.85036	3.7759	0.808999	4.53824	2.66735	3.5566	1.25371	1.77338	1.94585	3.82726	2.47053	2.65251	2.2557	3.19516	2.08521	1.74036	1.58265	1.84285
Macma4_01_g00540	62.4853	55.7749	52.3772	74.9654	55.7762	60.243	52.1794	59.39	64.6257	55.2508	52.3346	46.3532	55.8589	59.2114	61.2954	69.2922	54.3809	62.4335
Macma4_01_g00550	11.8273	14.0215	8.43395	17.8435	8.91522	15.3996	11.6311	18.308	15.9192	8.3005	13.366	21.4535	14.6205	12.2321	14.7139	14.0319	13.9504	14.3921
Macma4_01_g00560	16.0695	7.54408	1.83703	12.4849	12.2235	15.5728	13.2705	10.4873	16.7274	19.5321	2.73366	14.5457	18.7552	16.6291	20.4094	11.097	9.36553	12.9455
Macma4_01_g00570	26.599	38.8445	40.43	23.6091	36.1579	26.6854	33.5097	29.3134	23.0872	28.8223	34.9035	39.2568	34.3241	32.373	29.6487	24.8111	26.2662	31.7699
Macma4_01_g00580	11.4035	16.2724	18.434	12.6622	4.58887	17.1299	14.7166	17.4196	14.9556	13.9659	16.848	14.0818	14.1832	13.5629	12.0775	11.5426	12.2986	17.2132
Macma4_01_g00590	8.02466	3.74714	4.65789	6.65899	2.20243	6.6525	5.47005	7.75276	6.40954	5.05277	5.69787	4.70821	5.43181	6.08839	5.38767	6.53677	5.13788	8.01195
Macma4_01_g00600	10.0143	10.6881	14.797	11.9871	11.7524	13.8565	17.6957	10.6657	9.59488	12.7297	16.4469	13.1675	12.5578	13.1824	11.7313	10.9136	14.9794	10.2684
Macma4_01_g00610	60.415	75.0779	50.7939	70.566	32.0593	63.6149	53.5659	73.5358	75.8011	57.1279	60.4586	59.0079	64.0391	50.3368	51.6365	71.9333	69.8531	71.9424
Macma4_01_g00620	4.81159	11.7547	12.3456	4.7816	2.50398	5.42294	5.25592	5.12369	3.28959	5.53798	11.0127	6.67755	4.95533	4.77767	3.92732	3.63346	3.52744	3.80314
Macma4_01_g00630	24.5218	25.5049	38.1698	27.3227	27.3959	26.7626	37.191	25.2411	22.0518	26.2583	41.0673	35.2197	28.207	29.0319	28.4206	26.0466	31.234	28.0125
Macma4_01_g00640	31.9887	22.7401	29.6662	22.7267	20.3022	29.3545	27.7211	24.9289	25.7566	34.2252	29.389	19.226	22.4457	22.2925	24.2901	30.3985	33.5663	26.706
Macma4_01_g00650	13.3654	15.9763	20.7409	11.0697	17.8894	16.6827	22.849	15.5137	11.7408	15.9065	22.6924	17.474	13.598	13.9069	15.3676	13.2408	17.0614	14.1668
Macma4_01_g00660	54.9288	59.9191	32.344	62.4591	57.2423	55.5451	60.9532	59.5659	63.3189	73.2967	47.1896	70.0795	75.5485	79.2833	80.2006	64.0049	51.5761	67.5415
Macma4_01_g00670	9.0204	9.40242	6.93941	4.96126	6.05885	5.41383	5.76605	4.88898	4.91141	10.6604	8.5149	5.46098	6.66004	7.07999	7.6568	4.97977	4.42196	5.82855
Macma4_01_g00680	0	0	0	0	0	0	0	0	0	0	0	0	0	0	0	0	0	0
Macma4_01_g00690	16.0523	7.99107	11.359	6.37405	9.02322	8.6686	3.62469	7.47712	8.09066	18.412	9.67245	7.75853	8.0115	10.9077	5.98243	9.87233	6.92378	9.74954
Macma4_01_g00700	0.539502	0.929524	2.04907	1.32102	0	0.678243	0	0.677085	0.713297	1.18932	0.470582	0.14903	0.151864	0.726478	1.02851	0.3785	1.26851	0.767573
Macma4_01_g00710	30.0151	3.09674	1.81658	12.1718	10.5528	18.8625	8.80659	7.28331	18.5164	34.1114	6.91341	6.47119	14.3425	14.9497	17.0887	14.7918	10.3808	15.658
Macma4_01_g00720	3.02233	1.81955	0.714251	0.866391	0.578959	1.35095	1.67161	1.10344	1.01925	4.67553	0.562396	1.06864	0.998214	1.22683	2.56078	0.308419	0.58308	0.859999
Macma4_01_g00730	0	0.057671	0.61447	0.173916	0	0.0581113	0.50333	0.387626	0	0.281565	0.395127	0	0	0.397821	0	0.061911	0	0.115089
Macma4_01_g00740	3.33226	1.87995	3.42987	3.88308	0.518968	3.97025	1.75313	3.18986	2.91534	3.093	2.52061	1.91581	2.00105	2.03023	1.44612	2.68167	3.08371	3.08355
Macma4_01_g00750	4.5852	4.10875	4.85105	2.73487	4.0001	3.16104	7.05077	4.29172	3.03534	5.25898	6.95616	9.29373	3.73558	4.67818	3.90973	3.36773	4.47933	2.74239
Macma4_01_g00760	0.980457	3.42978	1.27108	1.61142	0.187817	1.42746	1.17132	1.28866	0.865704	0.473231	0.985198	2.70403	1.02447	1.68993	0.631354	0.960504	1.43757	1.59953
Macma4_01_g00770	18.8013	33.2954	49.8358	21.2129	16.6604	30.7669	40.4884	27.1669	15.1582	14.4834	52.1383	18.0892	14.1705	17.0643	11.2548	16.2401	35.7259	28.8897
Macma4_01_g00780	0	0.202688	0	0.30562	0	0.204236	0	0.0973098	0	0.395831	0	0.282722	0.384132	0.0998691	0.270995	0.108795	0.411364	0.101122
Macma4_01_g00790	13.0013	12.2225	6.76024	15.847	8.33445	15.3164	15.8991	19.3606	20.1684	11.2886	9.79143	19.6911	18.7377	15.938	18.2325	14.7717	14.9508	20.7793
Macma4_01_g00800	0	0	0	0	0	0	0	0	0	0	0	0	0	0	0	0	0	0
Macma4_01_g00810	5.92427	6.55254	3.39265	33.0131	2.86366	16.8379	3.19242	6.72124	2.62257	1.10492	3.42565	2.59391	4.36385	7.39073	7.7639	11.1588	6.48909	1.41791
Macma4_01_g00820	0.299767	2.07328	0.649098	2.49895	0.138609	2.19802	0.48024	0.632132	0.456348	0.815541	0.923269	0.584783	1.50838	2.85647	1.51518	1.42403	0.717919	0.82357
Macma4_01_g00830	79.578	63.1477	45.7729	75.4168	148.807	77.3559	86.9893	61.7507	76.5681	120.697	52.0162	106.65	103.706	94.5782	113.148	72.0081	52.4866	66.7747
Macma4_01_g00840	12.6166	12.2923	7.98286	10.3882	4.50761	13.5096	6.23043	12.3774	16.7089	10.3697	8.07855	11.81	13.3746	12.2607	10.8838	13.7069	13.9227	16.417
Macma4_01_g00850	0.0784365	0.223681	0.794422	0	0.0751268	0.450778	0	0.0715922	0.216426	0.509633	0.29191	0.0693342	0.141306	0.0734751	0.0664584	0.640336	0.151323	0.22319
Macma4_01_g00860	0	0.409351	0.763268	0.102872	0.20623	0	0	0	0	0	0.200331	0	0	0.605089	0	0.109862	0	0.102113
Macma4_01_g00870	0	0	0	0	0	0	0	0	0	0	0	0	0	0	0	0	0	0
Macma4_01_g00880	31.5837	104.655	329.998	66.3729	11.8325	34.1592	63.2992	33.0118	14.1136	14.676	38.5301	26.0984	16.5168	26.4562	8.45933	77.1462	192.429	37.2528
Macma4_01_g00890	12.4156	10.8146	7.06392	10.1621	2.0846	12.2712	13.0498	12.7318	9.78141	12.7179	10.2169	7.47685	11.0944	10.7035	12.4894	10.6002	8.5409	9.99329
Macma4_01_g00900	0.0946648	0.629907	0.575271	0.452283	0.0906703	0.362695	0	0.172809	0.261204	0.439339	0.616535	0.251038	0.511624	0.177354	0.0802084	0.0966025	0	0.179578
Macma4_01_g00910	16.3188	4.96218	3.61998	11.5265	6.41876	11.847	6.67176	5.40851	12.3491	21.2365	5.81946	3.18017	13.1532	9.27328	12.4919	12.1657	6.62323	11.2631
Macma4_01_g00920	26.3843	27.2267	45.4001	31.0064	14.9953	29.5182	67.5409	33.3328	29.3144	24.9641	35.6951	27.6053	36.0276	41.8819	38.5246	34.7276	28.9959	29.3396
Macma4_01_g00930	6.55014	3.29635	4.43204	9.02026	4.32308	5.56223	8.03713	5.5013	5.08791	6.89729	6.78564	3.01665	8.13127	8.17249	7.88173	5.13954	4.4866	8.56215
Macma4_01_g00940	51.2239	15.5014	5.30188	31.7931	40.531	58.8561	27.6719	35.4721	47.0375	40.4484	3.82495	51.3362	52.6087	56.4047	55.7553	33.1422	28.6318	31.2986
Macma4_01_g00950	0.431842	1.37811	0.531103	1.44426	0.590885	1.12272	0.358269	1.15432	1.16319	0.916194	0.660078	0.490793	0.611266	0.49121	0.548841	1.32204	0.624846	0.936228
Macma4_01_g00960	9.388	6.16572	4.94147	7.16294	2.94279	11.4446	7.78857	8.50389	10.4269	9.0308	6.08777	8.57517	8.62293	11.7389	9.53316	7.79477	7.01144	7.55531
Macma4_01_g00970	0	0.0420905	0	0.0423103	0.169641	0.169648	0	0.040415	0.162901	0.0410994	0.41197	0.0391403	0.159539	0	0	0	0.0427122	0.67197
Macma4_01_g00980	3.78994	1.44722	1.04986	1.42382	1.33411	2.26497	0.376235	1.98093	0.56607	1.44321	2.65217	4.63864	1.40055	1.97234	0.631256	1.52056	1.78106	1.75129
Macma4_01_g00990	9.33149	8.05118	4.61335	8.79903	3.77318	7.07499	8.47704	8.87679	9.08083	10.444	4.83354	9.29327	9.35912	9.20251	11.1608	7.91447	7.41009	9.99518
Macma4_01_g01000	10.7907	8.90847	8.58903	9.5834	13.0374	9.52352	11.5368	9.6201	10.0203	11.0441	10.6114	9.54616	10.4058	11.2268	10.272	9.48394	7.48746	8.45391
Macma4_01_g01010	1.3151	0.87508	2.33094	1.38231	0.251922	1.51159	3.27315	1.32038	1.51196	1.70895	1.10122	0.871867	1.48075	0.923938	0.278568	0.536809	1.14172	1.43448
Macma4_01_g01020	3.00013	2.94386	4.92056	2.05297	0.259545	2.7624	1.65398	2.45567	3.11541	3.2698	5.8708	3.4219	1.79579	1.99445	1.62358	3.04179	4.05159	2.58859
Macma4_01_g01030	1.06664	1.42947	1.38138	1.7544	1.27285	1.84235	1.95842	1.6758	0.884543	0.843978	2.21257	1.46838	0.992289	1.90006	0.888933	0.999251	1.65299	2.22242
Macma4_01_g01040	10.6358	11.7567	17.9044	7.4714	6.38818	10.9161	16.694	11.9832	8.42732	10.3229	17.0649	7.72727	8.57416	9.1138	8.31203	10.6387	9.80664	11.3317
Macma4_01_g01050	13.9081	27.2418	42.7825	23.5817	53.4683	38.8658	62.5339	46.2555	12.616	15.9638	47.293	14.6616	20.9546	28.4582	14.8478	23.7979	52.3172	19.2161
Macma4_01_g01060	12.7759	11.2605	9.2958	10.8282	11.6977	13.597	15.3507	11.7505	10.6927	14.6075	14.2323	10.3198	10.9349	12.4722	13.106	11.2392	10.2936	9.93577
Macma4_01_g01070	0.163897	0	0.331997	0.156611	0	0.156987	0	0	0.452233	0	0	0	0	0.30706	0.138868	0.167252	0	0
Macma4_01_g01080	0.172478	0	0	0.164811	0	0.413016	0	0	0	0	0	0	0.466086	0.0807841	0	0.352017	0.0831881	0
Macma4_01_g01090	76.476	92.1323	136.22	108.435	117.621	98.3532	119.759	102.744	71.9107	60.7363	126.969	105.554	90.505	105.226	78.037	112.453	217.613	80.0335
Macma4_01_g01100	1.16368	0.618933	1.50132	1.07224	1.08804	1.45963	1.82742	1.37826	1.05756	1.31159	1.16003	1.23682	1.43504	1.97252	1.12683	1.15923	0.962156	1.11689
Macma4_01_g01110	1.11061	3.0575	1.5485	1.62632	1.13282	1.75456	0.586344	1.48764	0.464311	0.749723	2.41555	2.00171	0.428742	0.702582	0.574382	0.971438	0.417398	0.519865
Macma4_01_g01120	0.168293	0.19997	1.27838	0	0.0402979	0	0	0.0384019	0	0.0390523	1.13521	0	0	0	0	0	0	0
Macma4_01_g01130	164.778	281.635	13.0374	251.569	181.519	195.462	241.776	300.826	431.124	159.005	162.931	300.452	317.266	307.052	327.972	349.81	286.736	430.451
Macma4_01_g01140	0	0.660043	0.625119	1.585	0.332528	1.03457	0.800082	0	0.0354797	0.0358056	0.538359	0.0340988	0.138989	0.216812	0.130738	0.31492	0.148842	0
Macma4_01_g01150	10.2391	21.3706	13.6394	16.7497	10.8198	12.5258	16.7586	17.0152	16.1223	16.4253	18.2765	15.1997	13.584	14.1787	14.9935	18.7396	16.7478	13.6704
Macma4_01_g01160	37.5861	70.4596	17.6642	63.1506	27.3384	55.8003	37.4459	66.6229	60.9334	24.8821	26.2183	53.5301	54.7299	68.2616	39.7822	47.4602	41.5916	39.2114
Macma4_01_g01170	12.9516	8.68452	9.85187	15.5083	2.36778	12.6115	9.98711	8.535	12.2088	11.9718	6.00012	2.80278	7.40644	10.2697	8.87918	16.5072	10.0569	10.7554
Macma4_01_g01180	0.398968	0	0.692714	0.599079	0.0545904	0.43674	6.76177	0.78033	0.524215	0.211612	0.848459	0	0.0513394	0.320341	0.0482915	6.7468	6.10267	0.432479
Macma4_01_g01190	0	0.792794	0.281567	0.132822	0	0	0	0	0	0	0	0	0.626037	0	0	0	0.402252	0.263685
Macma4_01_g01200	11.3345	12.8155	11.8927	9.09043	10.674	9.50278	14.5223	10.5191	11.2249	15.2638	17.2726	16.5063	15.0819	15.4807	14.6011	12.149	10.278	10.9054
Macma4_01_g01210	10.3373	19.0581	16.118	4.57496	2.63161	4.58595	0.767339	1.71325	0.475386	4.57028	12.7563	5.8914	1.34771	2.0641	1.84393	0.832807	2.25673	1.72876
Macma4_01_g01220	0.265316	0.042034	0.0447862	0.211268	0.169413	0.16942	0.220114	0	0	0	0.24685	0.938106	0	0.0828444	0	0.135373	0.426549	0.125825
Macma4_01_g01230	17.4506	15.284	6.13605	17.3966	19.933	17.3055	18.7364	16.2937	23.6499	18.2724	6.35387	25.155	26.4665	21.3576	26.8284	20.7967	15.2569	19.7539
Macma4_01_g01240	0	0	0	0	0	0	0	0	0	0	0	0	0	0	0	0	0	0
Macma4_01_g01250	3.37527	4.63264	4.6569	3.27459	3.59572	4.18966	4.41465	4.02383	2.15408	5.51459	7.194	5.95194	3.59875	4.38777	6.05525	3.69039	4.319	4.09979
Macma4_01_g01260	0.775674	0.216865	0.878046	0.566794	0.0874051	0.742972	0.416397	0.374818	0.377696	0.71998	0.169809	1.77465	0.493199	0.598384	0.54124	1.11748	0.704219	0.173111
Macma4_01_g01270	15.9725	13.9754	11.7653	17.3437	1.99924	13.9952	9.78789	11.5139	8.84783	11.9616	12.4967	15.8036	13.6518	13.602	9.84243	12.6877	11.1179	11.7928
Macma4_01_g01280	18.1838	20.0239	18.2495	17.3529	15.9915	16.1278	17.045	19.5285	18.2015	19.6839	20.3678	23.7973	19.5062	19.9315	23.9307	17.5197	16.9482	17.516
Macma4_01_g01290	4.35914	11.0554	0.191958	0.724409	2.14536	1.66684	2.61587	0.817769	0.903284	5.30956	0.336644	4.41679	1.80032	3.26027	4.1168	1.54726	0.531847	0.68638
Macma4_01_g01300	188.699	168.097	79.1788	208.908	264.211	189.695	244.868	220.932	262.662	233.52	124.389	282.805	318.92	282.892	327.538	237.835	198.433	228.413
Macma4_01_g01310	7.65062	3.09354	0	6.60129	1.96866	3.44529	1.79995	1.7197	5.61882	7.31328	1.00929	11.8096	3.90856	2.29976	7.40141	5.18539	1.15656	5.14459
Macma4_01_g01320	0.874602	1.8937	2.31296	2.32145	0.465387	1.07043	1.37057	1.06438	0.223449	0.451003	2.89327	1.88982	0.481439	0.637218	0.782209	1.23959	0.74992	0.875643
Macma4_01_g01330	104.412	86.3686	82.8308	93.0287	194.802	97.6306	117.7	88.3183	89.8738	136.452	104.5	106.229	123.903	123.562	137.946	94.9641	85.813	106.756
Macma4_01_g01340	4.90622	3.37468	4.7458	3.1816	1.56288	4.69937	4.33561	3.53217	2.8089	4.55395	5.40591	4.57077	4.32003	3.23261	4.39986	3.69029	3.54151	3.51368
Macma4_01_g01350	0	0	0	0	0	0	0	0	0	0	0	0	0	0	0	0	0	0
Macma4_01_g01360	9.7781	13.0824	16.1224	10.5389	8.95069	10.5458	12.8869	10.9189	7.2319	10.5321	14.5955	12.3696	11.1051	13.4599	10.5926	9.17292	10.6762	9.78568
Macma4_01_g01370	6.88192	17.2201	82.3245	2.62136	2.80876	1.31382	4.53224	3.08674	1.19632	4.54389	3.56453	4.09734	1.34205	1.6615	1.28241	3.86132	46.2638	2.19825
Macma4_01_g01380	20.187	12.9884	23.4231	13.2383	12.7656	21.8648	23.5522	13.4402	13.5852	25.7104	23.0618	14.2915	16.0098	16.3434	21.5859	16.3876	17.3549	17.3745
Macma4_01_g01390	0	0.509193	0	0.127963	0	0	0	0	0	0	0	0	0	0.376336	0	0.273314	0.129178	0
Macma4_01_g01400	0	0	0	0	0	0	0	0	0	0	0	0	0	0	0	0	0	0.440093
Macma4_01_g01410	0	0	0	0	0	0	0	0	0	0	0	0	0	0	0	0	0	0
Macma4_01_g01420	34.2099	38.6632	27.256	52.7892	25	53.1535	32.2055	55.4895	62.3646	32.8807	32.0234	32.8253	48.8453	55.4689	34.9708	43.9575	41.4007	57.2669
Macma4_01_g01430	0	0	0	0	0	0	0	0	0	0	0	0	0	0	0	0	0	0
Macma4_01_g01440	0	0	0	0	0	0	0	0	0	0	0	0	0	0	0	0	0	0
Macma4_01_g01450	26.5759	29.7963	32.793	24.0555	14.0341	27.4806	28.8605	24.7955	23.5614	28.7068	29.4612	27.534	22.0563	24.8028	23.6423	23.9087	32.1336	25.2771
Macma4_01_g01460	7.38069	4.73885	6.87424	4.85639	9.51868	6.79046	10.0174	4.19564	4.39657	8.87392	7.63002	5.99958	4.78208	6.15574	6.13472	6.47467	5.57908	6.19201
Macma4_01_g01470	0.222925	0.541544	0.301044	1.4201	0.284691	0.901556	0.821979	1.03997	0.729014	0.252901	1.19837	0.83201	0.691654	1.57778	0.713553	0.631911	1.43359	1.40962
Macma4_01_g01480	0	0	0	0	0	0	0	0	0	0	0	0	0	0	0	0	0	0
Macma4_01_g01490	1.69715	1.38123	1.67182	1.41066	1.62554	1.78148	1.74555	1.42174	1.11191	1.32713	2.1198	0.57542	1.51826	1.86203	0.994765	1.02015	0.975538	1.47743
Macma4_01_g01500	9.25966	8.41121	9.99473	3.5675	7.05734	5.98636	5.58078	4.57861	4.64403	12.7625	7.02378	6.71673	4.74076	6.37836	5.00279	5.85749	15.2781	3.93118
Macma4_01_g01510	11.6842	5.30277	4.04774	8.69846	3.66836	8.90542	6.56216	7.7515	9.18944	9.2481	2.42726	6.20678	8.14977	5.66755	7.97164	8.69471	6.71967	8.79222
Macma4_01_g01520	6.61063	3.94574	4.35979	5.03662	6.94171	4.88042	3.24326	2.68614	3.23196	6.89024	4.78149	4.4263	4.51047	5.24612	4.27992	3.40659	3.00831	3.97874
Macma4_01_g01530	49.8092	42.9582	43.6796	49.2093	66.8372	55.0719	62.0433	53.4726	56.378	57.5232	49.3553	68.2711	66.8472	63.7764	69.2087	51.9876	47.4767	55.0955
Macma4_01_g01540	0	0.0228413	0	0	0	0	0	0	0	0	0	0	0	0	0	0	0	0
Macma4_01_g01550	0	0	0	0	0	0	0	0	0	0	0	0	0	0	0	0	0	0
Macma4_01_g01560	0	0	0	0	0	0	0	0	0	0	0	0	0	0	0	0	0	0
Macma4_01_g01570	0	0	0	0	0	0	0	0	0	0	0	0	0	0	0	0	0	0
Macma4_01_g01580	0	0	0	0	0	0	0	0	0	0	0	0	0	0	0	0	0	0
Macma4_01_g01590	0	0	0	0	0	0	0	0	0	0	0	0	0	0	0	0	0	0
Macma4_01_g01600	0	0	0	0	0	0	0	0	0	0	0	0	0	0	0	0	0	0
Macma4_01_g01610	0	0	0	0	0	0	0	0	0	0	0	0	0	0	0	0	0	0
Macma4_01_g01620	0	0	0	0	0	0	0	0	0	0	0	0	0	0	0	0	0	0
Macma4_01_g01630	0	0	0	0	0	0	0	0	0	0	0	0	0	0	0	0	0	0
Macma4_01_g01640	0	0	0	0	0	0	0	0	0	0	0	0	0	0.063497	0	0	0	0
Macma4_01_g01650	0	0	0	0	0	0	0	0	0	0	0	0	0	0	0	0	0	0
Macma4_01_g01660	0	0	0	0	0	0	0	0	0	0	0	0	0	0	0	0	0	0
Macma4_01_g01670	0	0	0.209847	0	0	0.198456	0	0.189111	1.14338	0.384629	0	0	0	0	0.877752	0.211432	0	0.19652
Macma4_01_g01680	0	0	0	0	0	0	0	0	0	0	0	0	0	0	0	0	0	0
Macma4_01_g01690	0	0	0	0	0	0	0	0	0	0	0	0	0	0	0	0	0	0
Macma4_01_g01700	0	0	0	0	0	0	0	0	0	0	0	0	0	0	0	0	0	0
Macma4_01_g01710	0	0	0	0	0	0	0	0	0	0	0	0	0	0	0	0	0	0
Macma4_01_g01720	0	0	0	0	0	0	0	0	0	0	0	0	0	0	0	0	0	0
Macma4_01_g01730	221.8	223.932	108.798	235.752	90.3756	202.452	200.74	257.399	268.844	202.974	120.026	258.004	243.533	244.15	268.778	296.328	171.08	221.824
Macma4_01_g01740	0	0	0	0	0	0	0	0	0	0	0	0	0	0	0	0	0	0
Macma4_01_g01750	1.46484	0.325893	1.70459	0.238251	0.0298517	1.28367	0.284427	0.853417	0.802639	1.21502	0.927927	0.35815	0.421109	0.759081	0.68659	0.763315	0.481027	0.945971
Macma4_01_g01760	12.9386	15.1584	14.4343	13.8005	13.9475	14.6797	12.5959	11.1559	13.5909	13.2283	15.0143	14.1804	13.3534	15.5192	12.5404	11.9123	14.2079	12.1137
Macma4_01_g01770	6.93544	3.37318	4.39023	5.2652	4.01804	5.96748	4.65672	4.2917	3.10159	6.56704	7.4029	3.19519	4.54642	4.19811	4.53796	2.80397	3.31669	5.29604
Macma4_01_g01780	27.3992	28.0311	36.1326	24.0314	14.9301	25.3205	14.532	26.5485	11.6764	31.1	85.2236	34.9444	17.9493	26.5693	15.7263	11.1512	15.1139	19.6625
Macma4_01_g01790	5.3975	4.28153	5.48555	4.46395	4.24275	4.24291	4.63234	4.87555	5.0157	5.32091	6.19939	6.61378	4.82834	4.30639	4.384	4.46336	4.84747	4.51929
Macma4_01_g01800	2.02284	0.68674	1.75609	0.690326	0	1.52236	0.839104	2.76949	0.797359	1.07291	0.806595	1.02177	1.0412	0.406047	1.10181	2.06424	0.278753	1.23342
Macma4_01_g01810	8.70485	6.29517	8.58845	4.64295	5.46252	7.09795	9.78991	6.14731	7.07451	7.71415	7.4881	7.19717	6.50601	6.18597	6.16746	6.18366	6.56912	6.06782
Macma4_01_g01820	1.1791	1.39255	1.95418	1.09254	1.47157	2.08766	1.36358	1.69585	1.34738	1.45925	2.29381	1.20019	1.06209	1.50616	0.787121	1.13031	1.20632	1.08448
Macma4_01_g01830	3.04368	1.87211	2.59914	0.826891	0.34297	2.40088	2.8222	2.2606	2.3603	2.1881	2.11	3.50816	1.90839	1.56534	1.44113	2.16201	1.61192	1.89631
Macma4_01_g01840	0	0	0	0	0	0	0	0	0	0	0	0	0	0	0	0	0	0
Macma4_01_g01850	2.13918	1.49121	3.32213	2.31663	1.22935	1.50259	3.31282	1.95251	4.32852	3.44168	3.31716	1.76487	0.899217	2.53823	2.29583	1.8919	2.20106	3.38167
Macma4_01_g01860	0.267832	0.226308	0.271266	0.170617	0.114014	0.0570089	0.222202	0.135812	0.410564	0.193357	0.443008	0.710253	0.241253	0.0557535	0.100858	0.0911048	0.143531	0.0282264
Macma4_01_g01870	0.114519	0.43544	0.270637	0.0364761	0.0731246	0.329073	0.0633391	0.278737	0.245768	0.31889	0.106549	0.10123	0.206309	0.0357584	0.485154	0.311635	0.184113	0.253449
Macma4_01_g01880	0.0595182	0.254596	0.0602814	0.0284362	0.0285034	0.114018	0.123445	0.162974	0.0547419	0.11049	0.0830639	0.0526113	0.0268059	0.0836302	0.0504291	0.0607365	0	0.0282264
Macma4_01_g01890	0	0	0	0	0	0	0	0	0	0	0	0	0	0	0	0	0	0
Macma4_01_g01900	0	0	0.0373219	0	0	0	0	0.0336339	0	0	0	0	0	0	0	0	0	0.069903
Macma4_01_g01910	2.17242	2.29137	2.13999	1.67774	1.73871	2.90746	3.06145	2.0915	2.08019	1.87832	1.82741	2.81471	1.93003	1.53322	2.09281	1.94357	2.49745	2.62505
Macma4_01_g01920	0	0	0	0	0	0	0	0	0	0	0	0	0	0	0	0	0	0
Macma4_01_g01930	13.1604	5.79616	6.86185	9.07951	9.52275	11.7295	9.35852	8.78099	8.41224	13.4103	6.96533	5.55458	8.65052	12.1217	9.41419	9.86925	4.62372	8.69122
Macma4_01_g01940	0.613851	0.111146	0.177635	0.167589	1.06391	0.81196	0.921536	0.400205	0.940982	1.87212	0.24477	0.310066	0.421284	1.56078	1.11452	0.805392	0.535741	1.05357
Macma4_01_g01950	0.690242	0.894725	1.39818	0.659557	0.601014	0.961659	0.520587	0.687285	0.750277	0.46595	0.408675	0.942945	0.5087	0.35268	0.265833	0.70437	0.726351	0.892761
Macma4_01_g01960	0.124034	0.943234	0.200998	0.23704	0.42768	0.380174	0	0.158495	0.11408	0.0921023	0.669328	0.21928	0.4469	0.441515	0.231203	0.101258	0.335008	0.117645
Macma4_01_g01970	8.11814	4.91079	6.45664	7.24658	6.87371	7.42242	10.9471	8.14144	6.94001	6.61401	6.26271	11.1015	9.87993	9.21376	8.35542	8.90758	11.4395	6.9276
Macma4_01_g01980	6.41365	3.74339	1.36448	6.64566	9.63913	8.17261	7.41304	8.10311	7.02155	5.78213	5.67802	7.64397	12.0211	11.1746	8.16595	5.99266	5.29816	6.15977
Macma4_01_g01990	0.276172	0.487544	0.199795	0.0376992	0.0377883	0	0.261852	0.0360104	0.072574	0.219722	0	0.139499	0.248765	0.369575	0.568279	0.161043	0.0761147	0
Macma4_01_g02000	0.453052	0	0	0.185534	0	0.123986	0.10739	0.236296	0.0595278	0.0600746	0.120435	0	0.524691	0.54565	0.27419	0.132093	0.499456	0.736659
Macma4_01_g02010	2.74991	6.41622	3.29156	3.18505	2.8068	4.45647	5.93397	9.00033	1.39235	2.28175	5.98281	2.95869	2.01414	2.25072	1.70629	1.89914	2.96075	3.34597
Macma4_01_g02020	6.94208	4.00741	2.63346	6.56111	1.76505	6.81866	5.17296	3.5253	5.85096	5.2252	1.85548	2.63311	5.59375	4.91861	5.24028	6.44016	3.96919	6.63242
Macma4_01_g02030	0.253021	0.240517	0.0768796	0.26595	0.533158	0.121177	0	0.346414	0.372346	0.164398	0.141247	0.0894635	0.660945	1.99094	1.80081	0.30984	0.341698	0.335985
Macma4_01_g02040	11.9042	6.29042	3.89753	15.8425	26.1107	8.0953	13.8444	7.91109	14.5544	23.3674	8.09765	11.8262	18.4654	20.6516	26.6936	20.4422	11.1014	15.2481
Macma4_01_g02050	12.2518	17.9828	21.7491	7.34858	8.28405	8.97033	4.12247	3.6002	4.07373	17.8968	35.079	20.1018	8.22739	8.63861	7.58959	5.31811	11.0957	4.36826
Macma4_01_g02060	6.64767	16.0409	11.0954	6.67164	2.3924	5.18058	5.25404	6.67795	5.10119	6.90058	12.553	10.6572	5.81082	5.78501	3.39949	4.93728	7.77846	9.79372
Macma4_01_g02070	1.8061	5.5626	6.65851	1.72582	0.830349	1.24557	2.27757	3.36295	1.8605	1.81054	4.23462	2.10739	1.62687	1.62419	2.26483	1.47446	2.09065	1.57604
Macma4_01_g02080	58.6525	44.082	40.1013	51.7053	91.8944	57.0963	57.4472	47.1388	51.7675	76.588	44.5498	58.3554	61.686	59.3944	66.0637	49.1106	45.5937	53.5854
Macma4_01_g02090	5.01954	34.5231	31.8562	5.42785	4.09398	6.06039	4.42099	8.85507	1.48718	5.23336	25.0385	6.2019	3.91349	3.33225	3.45481	2.95571	3.68911	5.80123
Macma4_01_g02100	0.997339	2.45901	2.33592	0.863659	0.955254	0.656762	0.904994	1.33702	0.659311	1.12823	1.91385	1.2673	1.20718	0.467126	0.528146	1.3358	1.2627	1.03466
Macma4_01_g02110	19.3209	33.3667	7.95723	15.1111	6.10395	15.1151	13.2878	34.0389	46.3953	13.0512	9.94497	38.7179	29.9171	18.8253	37.2548	38.4005	32.6235	37.8669
Macma4_01_g02120	14.4993	6.03308	2.80563	14.5751	8.90006	11.94	11.1854	9.79354	17.3348	16.2247	4.33904	7.93487	15.603	12.4325	13.9637	15.8159	9.13254	12.8878
Macma4_01_g02130	12.9694	9.26991	7.62072	12.0381	14.9825	10.0519	11.5196	9.23975	11.5872	15.5762	6.0334	11.1362	15.6954	12.5432	17.0075	13.9169	6.94768	11.5267
Macma4_01_g02140	14.8006	21.6333	28.6913	14.1427	19.816	16.6156	23.964	17.2496	14.052	18.3172	27.208	25.5682	13.2244	14.0135	13.6191	17.7427	17.0403	14.9063
Macma4_01_g02150	0	0	0	0	0	0	0	0	0	0	0	0	0	0	0	0	0	0
Macma4_01_g02160	36.0735	34.36	45.3997	30.6442	53.6088	40.4483	43.5696	31.6117	28.0828	42.8902	49.3811	42.6689	38.8394	37.5421	35.9374	30.9434	28.7819	31.6916
Macma4_01_g02170	4.50284	5.41253	9.76845	3.71972	4.98063	4.17387	6.82065	4.10992	3.01928	4.01774	10.4061	5.90625	3.92515	3.72818	2.87986	4.12068	7.62221	5.20777
Macma4_01_g02180	4.42728	5.77687	4.5676	3.62611	2.66017	4.58303	6.41065	5.6975	3.89494	3.08843	4.57968	5.05596	4.03747	5.82158	4.68315	4.32147	3.81971	2.97338
Macma4_01_g02190	4.63908	1.44017	2.58124	3.33306	5.32074	2.47486	2.84513	1.71515	2.38724	4.57852	2.80827	0.809764	1.92538	3.03645	3.35348	2.45691	1.58606	2.86288
Macma4_01_g02200	40.917	39.497	0.494229	67.7495	36.068	61.7067	38.8299	84.8709	126.985	52.926	3.86393	103.44	97.1495	68.5465	83.2273	86.1684	68.2128	87.3684
Macma4_01_g02210	0	0	0	0.0653089	0	0.0654656	0	0	0.125725	0.12688	0	0	0.0615647	0	0.0579098	0.418477	0	0.064827
Macma4_01_g02220	4.6252	10.3108	1.29957	12.5459	5.60184	8.23159	6.10239	10.7583	16.6319	7.54755	4.456	12.1467	16.1407	13.4032	11.251	13.0786	8.99509	10.9675
Macma4_01_g02230	0.216851	0.652761	0.603988	0.207211	0.65772	0.363491	0.53972	0.247411	0.498623	0.419336	0.420332	0.926484	0.602273	0.304702	0.367471	0.331935	0.20918	0.274244
Macma4_01_g02240	32.4417	21.9366	14.7916	27.4308	25.7872	23.9728	23.9549	24.7774	32.094	35.6484	21.2117	22.6163	28.1177	24.2804	29.66	33.5608	25.0567	26.4883
Macma4_01_g02250	0.309327	0	0	0.0886729	0	0.474057	0	0.169401	0.0284504	0.114847	0	0	0	0	0	0	0	0
Macma4_01_g02260	2.2021	1.96768	3.70235	1.30461	2.27791	2.86859	6.79616	2.33153	0.729135	1.83958	3.60595	0.38931	3.01502	1.27894	1.52996	2.29211	1.52942	1.5874
Macma4_01_g02270	0	0	0	0	0	0	0	0	0	0	0	0	0	0	0	0	0	0
Macma4_01_g02280	2.71443	1.04091	1.48396	1.9748	0.48748	2.26022	1.6378	1.87226	2.58171	2.10438	3.30039	0.967952	1.20864	1.43029	1.59425	1.5896	1.60675	1.57989
Macma4_01_g02290	0	0	0	0	0	0	0	0	0	0	0	0	0	0	0	0	0	0
Macma4_01_g02300	6.11907	3.06052	6.23356	3.0595	4.77047	5.72478	7.57057	3.97777	5.02267	6.52176	3.9058	4.65423	5.81626	6.06527	6.13412	6.46214	4.82159	4.9097
Macma4_01_g02310	0.160895	0.19118	0.203698	0.0384357	0	0	0.133484	0.440567	0.295967	0.0746715	0	0.142224	0.181161	0.527514	0.374893	0.164189	0	0.801195
Macma4_01_g02320	0	0	0.255676	0	0	0	0	0	0	0	0	0	0	0	0	0	0	0.119719
Macma4_01_g02330	1.26013	0.171122	0.729306	0	0	0.862143	2.24023	1.15017	1.159	0.668371	1.33992	1.43215	1.29723	1.01179	1.52527	1.10222	0.868248	0.682986
Macma4_01_g02340	0	0	0	0	0	0	0	0	0	0	0	0	0	0	0	0	0	0
Macma4_01_g02350	0.205042	0.129939	0.138447	0.130618	0	0.261863	0.226812	0.124766	0.125725	0	0	0	0.0615647	0	0.11582	0	0	0
Macma4_01_g02360	0	0	0	0	0	0	0	0	0	0	0	0	0	0	0	0	0	0
Macma4_01_g02370	0	0	0	0	0	0	0	0	0	0	0	0	0	0	0	0	0	0
Macma4_01_g02380	0.283994	0.26996	0.0958785	0.0904565	0	0	0.157074	0.259213	0	0.263603	0	0	0	0.266031	0.320833	0	0	0
Macma4_01_g02390	0	0	0	0	0	0	0	0	0	0	0	0	0	0	0	0	0	0
Macma4_01_g02400	0	0	0	0.180913	0	0	0	0	0.0870679	0	0.0880764	0	0	0	0	0	0	0
Macma4_01_g02410	0.180018	0	1.64094	0.860078	0	0.862143	0.149349	0.32862	0.496715	0.334186	1.33992	0.795638	0.324308	0.168631	0.152527	0.734812	0	0.682986
Macma4_01_g02420	8.28763	5.16999	7.65943	4.0091	1.38914	7.54131	4.25432	4.01862	4.57353	5.33672	6.60241	1.78568	4.57243	4.41544	4.43265	5.76152	2.64816	4.86386
Macma4_01_g02430	10.3687	7.98943	12.5977	9.04008	14.7653	10.9834	12.404	9.34829	9.45892	10.2515	15.1092	11.3495	10.5001	9.53481	10.1093	9.956	12.5278	9.41405
Macma4_01_g02440	0.395716	0.18808	0	0.283593	1.13705	0.0947581	0.0820745	0	0.0909899	0.550955	0	0	0.267335	0	0.586749	0.302862	0.286287	0.375335
Macma4_01_g02450	0	0.195721	0.417072	0	0	0	0.512453	0	0.189373	1.33779	0	0	0	0	0.697813	1.05055	0	0
Macma4_01_g02460	0.513736	0.85461	1.23577	1.84087	0.553566	0.922645	1.01225	1.05504	1.00408	1.13252	1.19495	1.24883	1.50395	0.601551	0.435283	1.57276	2.6017	1.09637
Macma4_01_g02470	11.0669	10.1938	8.10973	19.4284	1.67079	9.80598	7.37837	13.3117	12.2829	4.08768	5.48092	7.50759	7.39278	6.67016	5.16091	10.9724	11.0616	10.2528
Macma4_01_g02480	13.0024	16.5352	17.3423	16.6402	26.0617	18.3183	14.5442	13.1273	10.8864	13.7285	17.1246	20.5131	13.7429	16.7497	13.6516	12.4951	16.9107	9.12512
Macma4_01_g02490	4.9685	8.99418	4.33208	4.41736	4.8623	3.84861	4.08618	4.51524	4.72873	4.3511	8.18019	8.38285	5.52621	6.71827	4.81376	5.55518	4.08424	5.22484
Macma4_01_g02500	21.384	23.8389	13.813	21.2305	31.8576	26.4053	21.5417	22.8416	24.9655	23.0687	24.3061	42.0771	29.7815	27.982	29.6739	21.7272	21.1129	24.3141
Macma4_01_g02510	1.30101	0.662525	0.235301	0.688184	0.244771	1.04588	0	0.487716	0.149575	0.819438	1.29692	0	0.272048	1.30576	0.629901	0.450448	0.694721	0.440714
Macma4_01_g02520	5.60037	8.69603	10.754	3.92275	0.922326	2.59717	4.14167	3.58512	2.8435	5.97447	7.68623	1.54562	4.45112	3.20464	4.33717	6.90455	2.4689	3.07659
Macma4_01_g02530	5.46886	1.89377	2.18921	2.68752	5.0136	3.20533	4.26706	1.87781	2.34732	7.3363	3.31947	2.81996	2.63901	3.3543	2.71402	2.44492	2.3488	2.98881
Macma4_01_g02540	3.23322	12.3312	22.2638	4.10676	2.02047	4.45652	0.523391	16.4469	0.924764	0.530677	4.36555	0.714503	0.887916	0.794111	0.0167041	0.502957	5.32484	2.28132
Macma4_01_g02550	6.73154	5.90264	8.4597	4.48948	5.36853	5.42136	4.08025	4.08774	3.86642	6.22271	7.79686	3.71594	4.77658	5.71378	4.28349	5.97211	4.3731	4.29999
Macma4_01_g02560	0.0232897	0.0664165	0	0.0778904	0.200763	0.323464	0.270506	0.286976	0.0749726	0.0216175	0.0650066	0	0.0944035	0.0109083	0.0493328	0.0594161	0.112329	0.110451
Macma4_01_g02570	35.2302	44.667	39.5631	32.9111	56.6242	39.6651	45.1625	39.3629	37.7608	42.6112	44.797	44.3908	42.1869	36.6493	42.7983	37.4493	33.7006	37.4315
Macma4_01_g02580	64.3131	92.0275	53.8945	103.508	74.0502	82.6543	60.3946	94.2028	75.1985	49.7408	67.9055	113.699	102.303	93.9245	81.6071	71.9655	75.6003	78.1003
Macma4_01_g02590	3.06516	7.02553	3.68474	2.0256	1.15238	2.79874	1.68738	2.95458	1.81798	1.24971	3.35824	5.34295	2.73518	2.68344	4.02911	1.37394	1.98957	2.68993
Macma4_01_g02600	15.0614	12.7697	15.4586	13.5602	9.77163	14.5885	16.6338	12.6292	13.8305	14.1146	15.3778	12.8292	15.2726	13.6709	14.919	15.0161	14.1555	13.98
Macma4_01_g02610	10.4963	10.0122	9.91888	6.82158	6.0715	9.18306	8.81866	8.16436	7.79229	8.78639	12.0776	10.0711	9.73854	8.89	8.5545	7.94059	7.51772	10.5995
Macma4_01_g02620	23.4235	22.7013	36.0496	19.0374	18.8003	22.8903	26.2045	19.5432	22.973	27.42	26.6481	22.5994	22.5429	21.1604	24.9882	21.3991	34.2867	22.7446
Macma4_01_g02630	3.0645	6.37959	36.004	1.25915	1.40889	1.11541	1.29662	1.11884	1.55021	4.92092	1.99585	0.379242	0.414058	1.66498	0.337547	1.15707	57.2889	0.435999
Macma4_01_g02640	13.635	14.5765	13.0881	16.0406	15.8423	17.6542	18.9292	15.6973	19.2083	17.7057	9.85562	18.5939	23.9344	20.68	20.2726	15.6761	14.9504	15.7663
Macma4_01_g02650	0	0	0	0	0	0	0	0	0	0	0	0	0	0.134464	0	0	0	0
Macma4_01_g02660	0.048589	0	0.049212	0.139287	0	0.186162	0	0.0443492	0.134069	0	0	0	0	0.136547	0.0823378	0	0	0.368692
Macma4_01_g02670	8.15538	6.50631	9.02314	6.18777	8.25482	7.9544	10.1717	6.95657	6.84395	9.47866	8.88042	9.53333	7.14103	5.92633	7.18928	7.3451	10.1383	7.51944
Macma4_01_g02680	23.9544	25.1262	17.3226	23.1681	6.18965	17.2665	5.40166	22.0859	19.8422	11.23	18.4898	23.365	18.5573	16.5677	14.9855	18.8418	25.7316	32.1223
Macma4_01_g02690	0.147728	0.0702138	0.0748111	0.282322	0	0.353749	0	0.202256	0.135873	0	0.893403	0.457046	0.133068	0.0691918	0.0625841	0.527631	0.285003	0
Macma4_01_g02700	0	0	0	0	0	0	0	0.0696035	0	0	0.354752	0	0.0686902	0	0	0	0	0
Macma4_01_g02710	2.25254	1.35738	1.16108	0.980111	2.13822	1.96493	1.46832	1.08306	1.10988	1.58677	1.81508	0.426672	1.10508	1.01735	1.85743	0.944086	0.911819	1.20179
Macma4_01_g02720	5.08881	3.23701	3.39083	3.40016	4.50761	4.03135	4.80908	2.497	3.87103	6.26831	3.64888	2.48588	4.98016	4.15762	5.00869	5.07584	2.62047	3.79242
Macma4_01_g02730	2.29982	2.97397	7.11383	3.48445	0.257983	2.46085	2.40649	3.7255	1.21961	1.15389	4.6265	2.21608	0.970476	0.970426	1.2113	3.70006	3.95724	2.57441
Macma4_01_g02740	0.79064	0.0835076	1.4236	0.587606	1.17799	0.757307	0.145764	0.24055	0.323196	0.815413	0.735614	0.155309	0.553918	0.576045	0.818767	0.358588	0.84741	0.166649
Macma4_01_g02750	18.698	37.5641	63.1664	26.6924	8.38538	25.2436	25.0595	29.1214	11.3727	9.03377	31.4484	15.717	8.699	11.0897	6.50017	31.7602	39.0766	17.9918
Macma4_01_g02760	3.2077	1.89183	1.99198	1.1634	1.59224	3.00519	1.88421	1.68829	2.2827	2.5862	1.6774	1.22111	0.738163	1.07471	1.66642	2.17428	2.16821	2.15417
Macma4_01_g02770	158.469	320.531	322.229	249.175	57.9135	257.787	126.699	251.603	123.958	81.6434	267.252	171.924	142.297	126.841	85.6263	157.753	203.676	193.458
Macma4_01_g02780	6.47035	5.51797	10.8785	4.06293	1.69984	6.69337	5.78211	5.06207	5.25398	5.37088	5.41803	3.13755	2.74761	3.32493	3.68094	5.99911	11.1989	4.82201
Macma4_01_g02790	2.06151	0.776093	0.702872	1.73582	1.42713	1.91595	1.72723	1.02465	1.8773	1.72404	1.13943	1.75011	2.42688	1.87375	2.50763	2.24951	1.87044	1.99405
Macma4_01_g02800	3.12571	2.30662	1.37462	2.43657	1.10298	2.00908	1.84253	2.32742	3.66924	2.09961	2.02807	2.76298	2.81553	2.85094	2.3696	2.97984	1.7456	2.92571
Macma4_01_g02810	0.443184	0	0.897733	0	0.282989	0.424499	0.367679	0.269675	0	0.548484	0.274893	1.17526	0	0.138384	0.500673	0.753759	0	0.140119
Macma4_01_g02820	0	0	0	0	0	0	0	0	0	0	0	0	0	0	0	0	0	0
Macma4_01_g02830	1.40784	0.535305	2.18636	1.25557	0.359581	0.71919	2.95889	1.79898	2.67604	1.13252	1.8338	0.248892	2.19809	0.703351	0.238568	2.01131	0.814817	1.95848
Macma4_01_g02840	16.5014	12.8695	18.3153	14.5489	23.7273	17.9035	18.8072	14.882	14.9459	16.4837	17.6714	19.0121	18.8877	18.1345	16.2787	15.4207	16.0808	18.5962
Macma4_01_g02850	20.1218	52.6005	166.269	44.9028	27.0289	48.0074	152.279	34.5482	7.95577	9.22464	41.8378	22.2877	7.90206	23.1016	6.34139	79.568	114.507	24.0314
Macma4_01_g02860	3.96474	2.67243	3.57751	1.99756	2.55464	4.83328	4.904	2.76343	3.38136	4.21534	4.62777	4.14185	4.74007	5.06448	4.39759	1.98616	2.99004	2.18795
Macma4_01_g02870	23.0949	18.3822	48.4468	16.7095	12.5022	37.2038	25.7838	19.4785	19.5264	25.0778	29.3526	10.4638	10.949	18.0111	11.1533	36.7187	58.0263	22.9011
Macma4_01_g02880	18.2716	20.0408	29.986	16.021	9.98795	18.7173	25.8187	16.4703	16.3383	14.4431	27.2759	14.1794	12.938	15.2217	13.599	16.8597	19.121	15.0084
Macma4_01_g02890	22.7322	25.5472	34.3312	21.091	19.1391	22.4235	50.1293	31.6918	23.3022	23.4482	37.2174	34.5004	23.7294	22.8227	23.9516	28.9595	33.2633	29.0209
Macma4_01_g02900	0	0	0	0	0	0	0	0	0	0	0	0	0	0	0	0	0	0
Macma4_01_g02910	14.7205	2.39287	4.54483	10.8764	2.14898	6.76167	3.2234	7.09262	13.4889	6.70481	1.57835	1.93491	3.79553	5.22869	4.96119	13.4024	6.01774	9.70618
Macma4_01_g02920	1.50208	2.40138	2.28201	0.717653	0	2.09273	2.03919	1.55796	0.87916	2.6934	1.30225	0.241412	0.645759	2.07862	1.01237	0.836087	1.1855	1.52186
Macma4_01_g02930	0	0	0.169369	0	0	0.160175	0.416205	0	0	0	0	0.443457	0	0	0	0	0.161309	0
Macma4_01_g02940	23.1326	19.8789	19.1408	19.884	22.7994	22.4046	16.3214	17.6265	19.899	24.9225	21.7148	14.2863	17.5347	25.0552	25.9	22.7631	17.4828	21.9902
Macma4_01_g02950	3.63065	1.63479	2.1289	2.59281	0.86021	2.96509	2.15603	1.11624	2.16175	4.18585	2.45347	2.16207	2.3581	2.2017	3.04382	3.00297	1.6958	2.71867
Macma4_01_g02960	6.75914	6.85157	9.82949	8.71635	3.39452	8.99509	5.26022	7.05653	6.17546	6.63471	7.87482	6.67534	7.28721	7.57831	5.90433	7.30951	8.03462	7.58826
Macma4_01_g02970	0.597418	0.973534	1.38304	1.46793	0.163488	1.3897	0.991273	1.16847	0.0784964	0.950611	1.74693	0.52809	0.768761	0.479682	0.723122	0.435462	0.740935	0.485699
Macma4_01_g02980	96.2692	39.4433	26.9036	76.5198	23.9455	73.1281	35.7209	50.5503	63.6332	57.0064	27.0969	18.9148	36.7506	38.6659	36.0399	77.3339	45.3013	57.0179
Macma4_01_g02990	3.19241	5.37461	3.17491	4.20821	0.497337	5.17618	1.65931	3.91438	2.61783	0.481965	1.91454	1.18997	2.39056	1.29707	0.993966	2.68863	2.8383	1.33158
Macma4_01_g03000	0	0	0	0	0	0	0	0	0	0	0	0	0	0	0.252831	0	0	0
Macma4_01_g03010	0	0	0	0	0	0	0	0	0	0.165286	0	0	0	0	0	0	0	0
Macma4_01_g03020	4.27085	1.09953	1.35175	2.61438	3.85627	3.0894	2.1407	3.02515	2.35277	4.39778	2.44211	2.02525	3.56651	3.0422	3.18515	3.1325	2.08133	2.97486
Macma4_01_g03030	0.618654	0.14702	0.46994	0.147788	0	0	0.128314	0.141168	0.711259	0	0	0	0	0	0.524179	0.473488	0.596768	0.293395
Macma4_01_g03040	16.5942	7.94534	8.24213	12.7649	9.743	12.772	11.5302	8.18836	12.467	21.7049	10.7186	12.5885	12.4746	13.5929	15.8046	12.5316	10.8527	13.2752
Macma4_01_g03050	8.41518	2.04573	0.251501	3.981	10.5706	4.25483	5.37918	3.95376	6.97856	11.1402	1.46322	13.4139	9.41919	5.68601	14.2368	6.92625	6.25444	7.79857
Macma4_01_g03060	8.42002	1.95096	1.30585	3.41943	9.67767	4.36016	4.78071	4.73126	7.86532	8.93893	3.28049	15.1882	11.0449	7.29587	13.0645	5.93411	8.29981	6.76345
Macma4_01_g03070	8.95647	1.46791	1.59877	4.4923	8.80862	2.9911	6.23484	3.25745	9.34239	7.13486	3.89518	13.0738	9.42773	7.68274	13.869	4.16719	4.73358	7.22578
Macma4_01_g03080	1.06174	7.84987	4.80921	1.57817	0.225986	1.32772	1.59042	0.834495	0.244133	0.547502	1.34457	0.391052	0.956374	0.718306	2.07407	1.53492	1.10952	0.22379
Macma4_01_g03090	2.9703	6.54542	10.7208	2.37382	2.76738	4.24174	6.8103	4.68283	0.521551	0.877237	6.13012	1.79019	0.340523	1.94769	0.983801	2.64532	4.94901	2.40753
Macma4_01_g03100	1.14728	1.84732	5.7151	1.54374	0.313963	1.61473	1.68996	1.51733	0.107675	0.47812	1.72096	0.289755	0	0.15353	0.277736	0.573436	1.37772	1.13261
Macma4_01_g03110	1.06137	1.28055	0.661526	1.52128	0.117298	0.977523	0.203203	1.04328	1.20147	1.09884	0.265866	0.757779	1.58115	0.764797	0.553408	0.999782	2.67769	3.175
Macma4_01_g03120	4.43468	6.26307	4.36321	6.53792	6.49269	5.33998	2.99588	7.34371	7.74971	4.88072	2.77034	4.25605	5.30711	7.53685	5.68986	8.27512	4.03335	5.40807
Macma4_01_g03130	1.91092	4.24209	3.5927	8.0802	7.43074	5.89659	3.97763	6.51715	3.62038	2.06048	3.96041	4.0459	4.75158	6.60281	5.53596	2.58058	5.35334	4.99251
Macma4_01_g03140	13.127	8.87244	7.39689	11.7914	14.6233	12.1363	13.7633	13.059	13.8976	18.4228	9.98744	13.4958	15.5531	16.2923	16.8302	13.0262	9.88409	11.794
Macma4_01_g03150	1.67436	0.163243	0.0289885	0.642705	0.945775	0.973226	0.40367	0.26124	0.789738	1.93935	0.159777	0.341551	0.567186	0.415572	1.27316	1.05146	0.262285	0.800847
Macma4_01_g03160	82.3244	62.9858	43.943	75.9549	52.0303	50.666	45.1099	42.0652	60.2088	39.9247	30.6348	101.216	66.4304	64.1369	51.9691	55.833	132.697	46.0646
Macma4_01_g03170	69.7391	36.0726	72.2377	57.5908	54.2785	61.626	83.695	45.4481	58.4468	68.5749	29.3442	37.936	44.1059	63.5403	56.8012	76.3837	72.0298	52.3167
Macma4_01_g03180	0	0	0.120021	0.283083	0.397253	0.22701	0.0983123	0	0.163487	0.219985	0	0	0.266854	0.388519	0.552226	0	0	0.168597
Macma4_01_g03190	0.0778803	0	0	0.148836	0.671346	0.149194	0	0	0.214891	0.216865	0	0	0.0701517	0	0.461909	0.0794744	0.45075	0
Macma4_01_g03200	0	0	0	0	0	0	0	0	0	0	0	0	0	0	0	0	0	0
Macma4_01_g03210	0.101053	1.34483	2.81459	0.144841	0	0.411369	0.670695	0.0461177	0	0	0.0940202	0	0	0	0	0.0257804	0.316804	0.0239621
Macma4_01_g03220	0.654658	0.133351	0.118402	0.0670238	0.268729	0.358319	0	0.512171	0.408583	0.173615	0.108767	0.537352	0.46333	0.613249	0.396203	0.453325	0.045107	0.510058
Macma4_01_g03230	4.50133	5.07407	6.267	4.3266	3.31939	4.7567	4.3954	3.80555	3.28521	3.38934	7.42483	4.13155	3.69582	4.6395	2.80138	3.18426	2.60012	4.0176
Macma4_01_g03240	4.48136	4.76703	5.70054	4.07823	5.33978	5.62103	4.82439	3.62772	3.2385	5.24901	5.18702	2.24003	3.24373	5.14742	4.61065	4.35532	2.80469	3.66863
Macma4_01_g03250	6.09659	5.8988	4.91775	5.76315	4.96343	6.9449	7.00883	5.48511	5.8877	7.13419	8.3261	4.4845	8.4335	6.64918	6.99196	5.15486	6.00692	5.14237
Macma4_01_g03260	0	0	0	0	0	0	0	0	0	0	0	0	0	0	0	0	0	0
Macma4_01_g03270	4.31327	1.06959	1.77275	2.15036	0.299367	3.05366	3.16353	1.48347	3.44967	4.00357	2.26826	3.2049	2.25231	1.99094	2.96603	1.59477	3.25618	2.84599
Macma4_01_g03280	10.6334	11.7393	8.65669	18.9066	5.73695	15.1487	7.42594	12.2855	8.54208	7.90217	11.7405	17.3711	8.15358	12.9238	7.64101	9.9239	12.5618	10.8198
Macma4_01_g03290	0	0	0	0	0	0	0	0	0	0	0	0	0	0	0	0	0	0
Macma4_01_g03300	0	0	0	0	0	0	0	0	0	0	0	0	0	0	0	0	0	0
Macma4_01_g03310	1.25443	1.04568	2.87332	1.49372	0.0184846	1.46034	0.912628	1.60296	1.54427	0.698618	1.49033	0.733553	0.95611	0.81352	0.703127	1.75277	1.34037	1.59253
Macma4_01_g03320	8.03549	6.3619	8.92824	7.18157	9.64646	8.54729	10.422	7.09709	7.78906	11.4793	8.32261	4.7098	8.19405	7.93299	9.7079	8.37679	5.64104	8.81315
Macma4_01_g03330	13.7264	13.3939	12.4619	11.5991	9.75743	14.0664	18.1382	14.8532	13.142	14.1224	13.6327	15.6127	14.5689	14.6862	15.3295	14.4124	9.3164	14.4312
Macma4_01_g03340	165.807	64.0086	58.7116	109.466	219.966	112.426	191.882	100.069	147.047	212.589	55.4163	81.8759	139.037	154.679	182.852	157.697	100.279	125.68
Macma4_01_g03350	17.6197	6.98894	2.42992	13.0895	1.80375	9.76038	3.42438	6.82845	15.8735	11.4458	2.3282	9.7828	9.94561	7.82967	10.0109	14.2947	9.87926	11.1088
Macma4_01_g03360	10.8637	22.1329	2.08164	78.8374	38.5557	44.3225	22.3859	42.0212	39.9674	9.72936	21.2533	30.3402	31.9222	63.6444	28.8579	35.2656	72.2508	66.3364
Macma4_01_g03370	10.6889	9.12268	9.86018	11.0955	10.2968	10.1941	12.5298	10.43	10.4252	9.05062	7.26914	10.0874	10.5425	11.2662	10.1642	12.4144	11.3789	12.1369
Macma4_01_g03380	25.1318	15.1825	17.5423	14.3732	16.3444	19.5295	19.5771	18.5038	17.4485	30.4269	18.5807	18.3312	17.8422	19.1647	21.4712	19.9523	26.575	17.0015
Macma4_01_g03390	10.0366	9.11267	13.7057	10.3243	5.80844	10.1969	10.4358	9.64423	9.74265	11.6265	11.5556	14.2559	8.77821	11.3863	10.9272	10.242	9.24726	10.1476
Macma4_01_g03400	1.11118	7.33177	6.55398	3.43519	0.563451	5.19647	6.50733	6.02568	1.26248	2.0628	5.35169	0.866678	1.00091	3.30638	0.830729	4.13551	4.41359	2.2939
Macma4_01_g03410	32.8427	44.1818	49.1819	26.9468	47.0781	32.3473	65.1392	31.6411	26.5237	22.7596	39.5492	37.1297	31.6189	36.1722	28.4433	43.937	66.7281	25.061
Macma4_01_g03420	0	0	0	0	0	0	0	0	0	0	0	0	0	0	0	0	0	0
Macma4_01_g03430	0.411363	1.43379	5.72877	0.262051	0	0	0.511919	0	0.0315293	0	0.701679	0	0	0.321119	0	0.034982	0.562148	0.650294
Macma4_01_g03440	29.4601	35.8611	30.1169	32.3063	25.6535	31.4979	32.8819	34.703	35.2772	26.9247	38.9083	33.7128	38.5729	38.3256	34.0319	31.0672	32.8219	31.5639
Macma4_01_g03450	43.633	46.547	19.4172	39.7507	12.9814	34.7371	25.626	41.1624	54.1453	28.0214	28.576	44.5211	40.071	37.4328	40.8038	47.0246	40.3391	53.536
Macma4_01_g03460	14.2478	17.0073	14.176	15.7755	11.7212	15.8133	18.7626	13.6697	12.1799	12.735	20.3636	20.3909	18.8548	19.7256	18.2251	13.5137	12.9196	13.1088
Macma4_01_g03470	2.19368	1.37809	3.47761	0.911374	0.602928	2.63106	0.775454	1.04466	2.00009	6.30328	0.798655	0.826229	1.28869	1.16148	1.08288	1.90766	6.14581	2.27972
Macma4_01_g03480	3.03067	5.50251	10.9582	2.60635	3.83167	4.6156	3.9475	3.37478	3.37282	5.31669	6.90837	7.55469	4.04027	5.08175	3.26117	4.17515	6.98704	3.392
Macma4_01_g03490	0.01119	0.148918	0.58934	0.117618	0.107178	0.0428729	0.0557014	0.0306407	0.041168	0.155798	0.176991	0.178046	0.0403182	0.0733753	0.151698	0.0228381	0	0.0742956
Macma4_01_g03500	6.29507	6.4925	6.57738	5.13552	5.81495	5.85092	5.65607	5.10987	5.70979	6.75533	8.1488	5.80648	5.22212	6.47957	5.76591	4.40533	4.05624	6.89125
Macma4_01_g03510	114.298	105.226	80.305	127.551	97.6567	103.542	94.7272	137.195	140.638	107.133	76.242	105.313	106.625	114.424	122.055	140.134	105.015	117.707
Macma4_01_g03520	0.35423	1.26272	1.2557	0.676965	0	0	0.29388	0.40415	0.244352	0	0.0823941	0	0	0.248867	0.0750336	0.18074	0.341698	0.0839963
Macma4_01_g03530	0	0	0	0	0	0	0	0	0	0	0	0	0	0	0	0	0	0
Macma4_01_g03540	0.0798627	0.094895	0.0202217	0	0	0	0	0.0182235	0.0367268	0	0.204337	0	0.0179843	0.187028	0	0	0	0.0189373
Macma4_01_g03550	1.29323	1.03522	0.896187	1.72353	2.31434	2.21663	0.903498	1.70845	0.970339	1.20038	0.633277	1.11307	1.22621	2.55038	1.44176	1.45862	0.722224	1.45258
Macma4_01_g03560	9.91638	5.00774	4.12847	7.69888	1.91785	8.10552	5.0825	5.54814	7.84896	8.36359	2.92755	2.84461	5.71153	7.54741	5.49363	9.51122	4.71379	7.59686
Macma4_01_g03570	63.3664	64.3847	42.1402	79.8153	107.441	65.9755	67.5803	58.2068	90.3608	91.1073	47.7345	71.9854	100.454	94.2228	99.7148	75.9153	52.2034	71.6068
Macma4_01_g03580	8.16295	16.6276	15.9447	7.8465	1.02385	5.72448	6.6513	7.31761	3.30704	3.29232	7.64005	7.43042	2.84487	5.00671	2.47013	5.30544	7.31172	9.03295
Macma4_01_g03590	5.42912	9.14294	7.29769	4.61135	1.76544	3.98042	4.72659	7.03541	3.54472	2.51965	8.41878	5.09532	2.53574	3.7044	2.07285	3.24891	3.45904	5.6263
Macma4_01_g03600	19.1676	20.7964	16.1539	16.9398	20.6299	15.7367	20.2815	20.0201	18.5381	18.4202	20.7752	22.5327	16.1975	20.7317	18.7518	19.7903	18.3805	20.5098
Macma4_01_g03610	9.50412	7.44732	8.052	9.14298	2.68172	8.10697	4.15556	7.57286	9.78093	8.95285	4.58863	8.08331	8.23704	6.82158	8.18332	8.24386	7.92898	9.98917
Macma4_01_g03620	1.89213	5.01046	5.27008	6.48949	0.873782	6.05198	3.11151	3.05313	2.26859	0.846775	1.69757	0.657075	1.40001	3.03848	1.1165	2.58597	1.49926	1.37806
Macma4_01_g03630	20.8855	29.1281	25.3212	27.5044	20.4492	24.3493	22.6319	28.4936	27.4915	19.3448	26.0602	33.8336	26.2464	22.1965	22.9261	30.4794	26.229	28.8124
Macma4_01_g03640	1.42942	2.75565	8.00994	0.957386	0.870081	1.30517	0.498737	0.621859	0.909235	1.06639	1.90168	0.212557	0.493366	1.36403	0.792326	1.0088	1.71389	1.79928
Macma4_01_g03650	9.24468	6.97447	8.39717	9.25437	3.51372	5.90328	8.46098	9.04071	9.71748	7.28696	6.21204	11.5444	8.06291	12.3026	6.83825	14.6001	5.16656	10.4387
Macma4_01_g03660	18.7458	43.296	32.6123	31.7023	16.8963	23.0856	17.2272	30.5731	31.8635	10.9094	26.6759	36.2971	25.2135	27.8731	18.6023	27.1544	22.9826	32.436
Macma4_01_g03670	33.6834	43.3852	52.2544	35.4491	52.312	39.3418	43.8381	36.1674	32.2152	33.0902	55.3009	48.1664	43.7399	42.7735	36.512	33.5098	39.243	40.2817
Macma4_01_g03680	10.1364	5.01849	7.80673	6.81033	4.90491	7.98975	4.81793	4.33684	8.78883	7.25247	6.72938	5.50674	6.515	7.31925	4.92047	8.45829	4.37964	6.86024
Macma4_01_g03690	100.157	144.035	64.7556	124.532	70.1183	104.449	68.2436	123.653	131.465	59.1585	98.2765	117.317	105.599	90.8642	86.3618	110.15	93.3354	118.501
Macma4_01_g03700	19.4307	8.06324	2.34759	15.763	15.1626	18.5642	10.4945	9.76783	14.1973	17.8295	1.21593	10.7894	19.9679	18.779	18.1348	14.4687	8.7294	10.5715
Macma4_01_g03710	39.8595	39.6278	72.4159	31.0535	60.2436	36.5952	34.7175	33.0437	30.636	48.1987	63.3426	41.3335	31.6792	33.5106	34.1901	37.0411	36.0568	34.1722
Macma4_01_g03720	7.34256	10.6873	17.1269	10.543	8.9006	10.5934	10.2721	5.84172	3.98458	6.01355	13.3708	11.2455	5.9537	6.19153	4.16969	6.30415	9.88561	5.62365
Macma4_01_g03730	0	0	0	0	0	0	0	0	0	0	0	0	0	0	0	0	0	0
Macma4_01_g03740	2.8512	5.86143	22.354	4.72675	2.8954	5.42908	4.87338	6.70981	2.08527	3.20447	8.29388	3.49201	3.72861	2.71912	1.71724	2.97967	6.47818	3.09534
Macma4_01_g03750	5.95546	7.08204	8.07024	5.20712	6.12126	7.04592	6.37621	6.55303	5.57496	7.34134	8.79329	6.94977	6.06417	6.10796	6.40223	5.72905	7.82242	6.97718
Macma4_01_g03760	0.733761	5.14707	2.09283	1.39423	1.96299	1.13098	0.783679	2.0092	1.86173	0.688905	0.462976	1.7669	6.17642	2.74939	5.86691	2.51315	1.48882	1.69593
Macma4_01_g03770	0	0.279601	0.794422	0.374748	0.0939085	0	0.406708	0.268471	0.901775	0	0	0.346671	1.05979	0.459219	1.16302	1.50079	0.189154	0
Macma4_01_g03780	11.8581	18.6141	10.4113	23.0211	15.4076	20.8443	9.85343	17.2042	20.3265	16.0478	10.5607	16.8775	19.0267	21.3007	14.5215	18.0074	17.602	25.8457
Macma4_01_g03790	0.300466	1.39147	5.9303	2.99623	1.3799	0.339454	0.402676	0.0984476	0.191321	0.26459	2.80271	0.503954	0.180432	0.627872	0.0848603	0.455993	0.832348	0.146149
Macma4_01_g03800	0.430632	0.204676	1.30846	0.411488	0	0.618715	0	0	0.396074	0.399712	1.60265	1.71296	0.581846	0.403393	0.364869	1.31834	0.830794	0
Macma4_01_g03810	3.88385	3.42821	1.89658	6.03069	3.71996	6.15588	7.9595	6.77338	5.69846	3.62644	6.77539	7.35672	7.14262	6.88655	5.44539	4.76545	6.57858	7.47726
Macma4_01_g03820	12.3449	12.9692	14.9353	11.5411	9.67724	16.8336	10.0351	12.8101	10.4544	12.9114	14.5474	11.4783	9.66173	9.08124	6.58627	11.6899	16.1806	14.8809
Macma4_01_g03830	0.404461	0.480592	0.655435	0.347833	0	0.0968522	0.385886	0.590669	0.576604	0.075084	0.0940779	0.411153	0.437188	0.113663	0.0171347	0.082548	0.351137	0.0767259
Macma4_01_g03840	18.387	10.5011	8.26008	17.7821	13.8238	16.5229	6.72506	20.2112	16.6159	9.10687	8.84108	8.05015	18.6994	11.1122	20.6046	11.4245	11.3595	7.82924
Macma4_01_g03850	2.64471	5.29652	5.1752	4.19555	3.36929	4.35319	2.8545	3.58575	1.79483	5.00497	9.46036	6.46867	4.27882	5.14727	4.93853	2.46302	2.30346	3.40961
Macma4_01_g03860	24.7214	14.279	5.89468	16.4721	9.39696	13.8924	11.1745	19.9165	24.3179	17.407	4.28043	18.1288	15.6942	11.8904	8.3127	22.7951	16.6108	16.263
Macma4_01_g03870	13.7222	9.43751	9.58143	10.0298	12.887	11.2226	14.5043	11.518	12.0983	16.1035	9.42378	9.81021	12.4207	10.1143	12.6321	11.4788	8.64178	10.368
Macma4_01_g03880	0.120672	1.60592	0	0	0	0	0.500564	0.110142	0.332963	0.448029	0.224546	0	0	0	0	0	0	0.114456
Macma4_01_g03890	1.28641	0.265835	1.35955	0.481001	1.33927	0.857167	0.417618	0.765757	0.82308	1.81703	1.30096	0.197761	0.806089	1.04786	0.805624	0.627834	1.133	0.530503
Macma4_01_g03900	22.9704	15.6965	11.2599	24.4879	36.525	21.8845	16.3442	20.4064	22.2924	25.8737	11.0662	20.2686	21.4641	26.0353	27.0467	27.7367	16.3226	19.849
Macma4_01_g03910	2.90618	27.8527	25.1604	4.85022	2.89794	8.2747	1.00736	3.14314	0.274619	3.51046	17.7607	0.351908	0.10758	2.10703	0.269849	0.162502	1.88171	0.698565
Macma4_01_g03920	8.21483	5.25251	4.38351	6.00267	2.93799	3.88393	4.67134	4.58318	6.49278	8.07352	4.98463	3.86291	6.07488	5.1367	6.92472	4.90972	4.25596	5.16127
Macma4_01_g03930	0.612045	1.20723	0.774866	0.146209	0.0586219	0.234497	0.203109	0.0279319	0.379977	0.639112	0.583685	0.162306	0.179175	0.200666	0.518579	0.281058	0.147598	0.261235
Macma4_01_g03940	59.5557	45.2411	44.4752	56.2047	79.5706	50.5929	51.8827	54.1237	59.4821	68.3307	50.0341	51.7985	53.4135	54.2025	51.5524	58.2581	46.6194	48.3188
Macma4_01_g03950	1.59147	1.77756	3.42523	1.82486	0.419186	2.51521	2.24456	2.83256	2.01266	1.66185	3.70176	2.14534	2.18614	1.8635	1.68554	3.24808	2.26437	2.18877
Macma4_01_g03960	0	0.208129	0.904082	0	0.0161315	0.0161321	0.0419184	0	0	0	0	0	0	0	0	0	0	0
Macma4_01_g03970	57.2626	76.8377	79.3825	57.9448	57.9673	60.8409	66.1328	61.9814	48.881	66.1263	90.9311	69.2917	60.8844	66.2977	63.6567	53.6242	58.5266	58.053
Macma4_01_g03980	32.136	28.8893	30.1479	28.1692	31.7528	30.856	37.939	29.2843	23.6648	42.084	39.8337	25.4832	32.3718	32.0793	33.0978	31.0399	29.0648	28.9741
Macma4_01_g03990	296.441	176.638	187.682	204.425	396.059	261.005	343.892	253.123	313.818	557.275	365.732	378.976	247.263	270.595	268.409	274.144	331.847	280.801
Macma4_01_g04000	8.68042	11.3311	7.77523	21.1485	19.9	29.8005	22.8025	62.2588	14.6073	7.19097	5.16031	5.49411	9.16711	15.2071	7.08629	8.12142	21.1796	16.6671
Macma4_01_g04010	53.1148	39.6019	40.103	41.6369	47.5483	48.5332	41.9423	46.0514	44.6337	40.6334	28.1985	39.3461	34.9813	33.7912	37.5745	47.4138	44.7946	44.9711
Macma4_01_g04020	33.5095	16.8181	24.0477	21.8256	34.1121	25.4029	24.4539	21.6391	24.4578	40.6283	25.4818	23.975	24.9569	23.3352	25.6639	23.146	18.5513	22.6882
Macma4_01_g04030	39.2473	32.8135	30.0704	42.5062	25.564	29.071	28.0478	36.9363	39.0903	32.5127	29.61	35.1422	33.3834	35.5742	28.214	41.2439	25.5498	34.188
Macma4_01_g04040	4.63885	2.59916	3.44735	3.43258	3.36845	3.98269	5.2487	4.20824	3.23462	6.93124	2.51766	4.46723	3.96618	5.02549	4.48166	3.62732	2.96496	3.58612
Macma4_01_g04050	5.0322	5.50661	9.36374	3.28021	2.98906	4.98818	12.5246	5.07376	4.03636	3.65705	6.73261	4.34478	3.97061	4.93314	2.87553	4.87645	8.5042	2.73801
Macma4_01_g04060	0.558362	2.12308	28.5723	0.508133	0.458401	0.203741	0.551469	0.194148	0.342369	2.91219	0.346334	0.141019	0.167651	0	0	0.352728	48.0387	0.176535
Macma4_01_g04070	9.80588	15.5006	37.3272	10.4228	4.22117	9.60353	7.81533	8.59825	6.58688	5.93151	9.84099	10.2749	6.99675	7.74069	6.67473	6.12763	16.9517	7.62877
Macma4_01_g04080	14.4985	1.6514	9.21033	3.4635	3.2868	5.87537	7.9359	7.20397	7.33819	5.95235	0	4.17089	5.81505	6.28844	5.39715	11.6655	59.8318	5.5536
Macma4_01_g04090	4.61525	10.8015	18.053	7.08655	11.1884	5.27432	7.12978	7.75686	3.0446	5.25882	10.7203	4.38916	4.84535	5.2178	3.20926	4.7422	10.1321	2.83786
Macma4_01_g04100	15.719	19.4122	24.7578	14.0147	17.6714	14.9797	18.8321	14.2744	12.1787	19.8948	27.7256	21.1131	16.631	16.6464	18.4428	14.9805	16.6664	15.1369
Macma4_01_g04110	12.2986	4.33659	5.23802	8.87917	3.76545	9.32336	6.48823	7.56036	12.5298	11.435	5.73109	4.75738	7.99138	8.6454	9.74355	9.67553	7.66563	7.93628
Macma4_01_g04120	0.458608	1.52581	0.774147	0.365184	0	0.0732122	0	0.453473	0.140602	0.0709466	1.28007	0	0.275398	0.1074	0.58286	0.350996	0.516114	0.108747
Macma4_01_g04130	0	0	0	0	0	0	0	0	0	0	0.282929	0	0	0	0	0	0	0
Macma4_01_g04140	0.596645	0.202557	0.402864	0.257912	0.653107	0.408208	0.506781	0.220426	0.535698	0.936195	0.502252	0.27626	0.511844	0.425832	0.469421	0.492885	0.150736	0.4177
Macma4_01_g04150	0	0	0	0	0	0	0	0	0	0	0	0	0	0	0	0	0	0
Macma4_01_g04160	0	0.0944656	0.503254	0.759671	0	0	0	0.0453525	0	0	0.0462302	0.175688	0	0	0	0	0	0.0471291
Macma4_01_g04170	8.11481	15.4714	9.61979	8.30478	9.4726	9.29631	8.97001	13.0038	11.2802	6.26966	4.89037	13.5311	14.8475	16.9954	9.76645	8.42206	9.98479	5.64145
Macma4_01_g04180	0.295015	4.58046	0.647395	4.34596	4.12076	3.81479	1.95803	5.83423	1.9446	0.661762	0.503219	4.2594	3.36602	4.42167	4.18688	2.15755	2.58492	2.98475
Macma4_01_g04190	15.4055	23.29	1.71897	19.378	2.79269	12.1716	8.91771	32.1342	59.1583	11.3102	2.22693	20.7343	21.3638	11.4959	11.0986	53.5573	23.3821	26.1696
Macma4_01_g04200	73.8612	50.4281	0.689476	89.1166	48.599	78.921	72.9763	96.9078	158.855	94.8707	4.38835	116.632	132.932	104.285	116.882	139.78	98.9687	112.695
Macma4_01_g04210	11.0809	4.86087	8.58434	11.6732	6.96313	9.18898	7.63773	7.18982	10.1188	19.2961	6.3463	3.1431	9.90989	8.05498	12.9607	13.7955	8.20129	10.9693
Macma4_01_g04220	8.5894	1.20596	2.82261	2.96108	2.23104	2.86859	2.65716	1.23388	3.06057	8.78345	1.19971	0.661826	2.77259	1.44167	2.2908	2.88636	1.84568	4.04391
Macma4_01_g04230	23.2187	20.5871	18.9306	23.9555	14.0996	20.5948	29.8474	23.0656	24.412	24.4707	24.9646	25.7489	26.6404	27.1405	23.6793	23.4208	21.6873	22.8056
Macma4_01_g04240	12.189	11.8476	7.61851	9.2338	3.7338	7.83602	3.23415	9.47165	6.21142	8.30702	9.09301	4.80486	6.82506	8.07491	8.28071	10.7016	5.34927	7.91581
Macma4_01_g04250	36.5565	20.5065	17.5798	37.7746	40.646	28.0597	27.8304	33.0433	38.7053	32.9782	13.1171	31.187	33.5031	32.6514	39.7678	43.8114	25.3881	35.9168
Macma4_01_g04260	5.27664	3.71107	2.81659	2.52103	2.71481	3.41498	2.9283	3.69351	5.91892	4.16972	1.32687	6.35038	2.9064	3.23958	4.51615	4.76614	4.14419	4.09182
Macma4_01_g04270	2.94387	4.13096	1.24944	2.21022	4.01465	2.7929	1.8143	2.96849	3.50702	2.39419	4.30413	6.64192	4.77312	2.75766	4.34722	2.60358	3.05608	3.93574
Macma4_01_g04280	0.761696	2.77554	0.771462	1.15241	0.729555	1.94555	0	5.21423	2.7439	1.17834	1.94888	1.73937	2.05832	0.297298	0.591595	2.07276	2.87776	4.33479
Macma4_01_g04290	7.08816	9.52779	12.0978	10.4189	9.99266	10.7038	12.0735	10.4525	7.81811	6.38904	11.9583	10.4264	8.60446	9.76778	7.41331	7.84355	10.224	8.95012
Macma4_01_g04300	8.92434	8.74842	8.19138	8.02794	8.68132	10.9522	9.71762	9.76836	9.45861	8.93071	9.95739	8.87478	9.01215	8.26187	8.59528	10.3877	12.9802	11.5398
Macma4_01_g04310	7.63615	13.6613	23.6796	7.37676	14.3168	11.6084	15.121	9.52256	3.77662	8.74073	23.6531	9.67592	7.05764	8.30117	6.35464	6.6594	8.76039	6.59706
Macma4_01_g04320	0.101677	0	0	0.291471	0.389546	1.46085	0	0.185609	0.374069	0.471882	0.283802	0.0898777	1.00746	1.52393	0.430749	0.415033	0.686559	0.19288
Macma4_01_g04330	39.1517	35.808	37.3311	32.8417	42.8299	37.3135	35.544	32.7744	29.1165	45.1402	47.0427	37.9702	39.6243	39.0329	41.3475	31.6485	28.4328	35.6498
Macma4_01_g04340	0	0.194505	0.0690802	0.195521	0.783932	0.326651	0	0.373525	0	0.126617	0	0	0	0	0.11558	0.0696018	0.0657927	0
Macma4_01_g04350	0.610062	3.42149	1.42113	4.89671	7.1287	4.9669	1.36654	1.9489	0.561104	0.0566259	1.64605	0.431413	1.31885	1.71442	0.982107	2.67696	1.23581	1.38874
Macma4_01_g04360	1.41329	1.605	0.468691	2.82043	3.0547	5.01948	2.52141	1.88358	1.21935	1.0332	0.674918	1.60306	1.46456	1.78081	0.890148	1.76129	1.06168	0.367747
Macma4_01_g04370	7.58573	7.94834	1.13499	12.6712	16.3064	19.8712	9.83337	11.0545	5.93307	3.26716	3.569	5.44816	7.71295	10.5916	7.52287	5.98169	4.54564	4.63317
Macma4_01_g04380	2.31038	6.0202	1.51412	8.70084	4.24355	13.9548	4.30708	5.25955	1.57498	0.832569	2.75653	2.25851	3.67255	4.09933	1.84241	3.57812	1.65182	0.902336
Macma4_01_g04390	0	0.043859	0	0	0	0.640812	0	0.0210565	0	0.0214131	0.171712	0	0	0.0216103	0	0	0.0890136	0
Macma4_01_g04400	10.7211	26.7221	13.3565	15.042	6.29137	15.7531	22.3511	13.8399	9.83754	6.52906	17.4678	10.656	18.4868	19.9915	10.5125	13.5087	13.8254	16.3275
Macma4_01_g04410	45.1509	55.6965	67.5069	38.4697	43.0827	54.6754	57.0612	41.5022	37.2241	54.0691	83.3047	68.2232	53.2181	48.5903	53.3203	36.7646	39.4915	41.7966
Macma4_01_g04420	4.83276	7.50344	14.6842	4.69489	2.08298	8.79513	11.7609	7.0577	4.96351	9.12106	15.1379	9.04227	6.38466	9.73321	9.96388	4.6851	6.6819	6.87578
Macma4_01_g04430	2.40762	10.1314	5.11489	1.48697	1.15302	1.15306	1.3641	1.63475	1.10721	2.31651	1.09271	1.24579	0.502504	0.797617	1.11949	0.808981	0.962966	0.891169
Macma4_01_g04440	6.29919	4.57328	6.93743	5.92177	6.81441	6.34604	7.40773	5.34018	4.27495	4.61697	5.91769	6.37909	5.63736	4.46852	4.68087	4.38943	4.38519	4.40856
Macma4_01_g04450	0.170514	0.713186	1.34706	0.0977605	0	0.0326651	0.282928	0.31127	0.0313661	0	0.126918	0	0.0307186	0	0.0288949	0	0.131585	0.226425
Macma4_01_g04460	4.93593	6.32664	21.2386	4.22964	3.87362	6.4207	8.0579	5.08654	2.37242	5.3796	11.1107	6.82619	2.81109	4.221	3.77743	4.09456	8.0635	3.36781
Macma4_01_g04470	0	0	0	0	0	0	0	0	0	0	0	0	0	0	0	0	0	0
Macma4_01_g04480	0	0	0	0	0	0	0	0	0	0	0	0	0	0	0	0	0	0
Macma4_01_g04490	0	0	0	0	0	0	0	0	0	0	0	0	0	0	0	0	0	0
Macma4_01_g04500	0	0	0	0	0	0	0	0	0	0	0	0	0	0	0	0	0	0
Macma4_01_g04510	0	0	0	0	0	0	0	0	0	0	0	0	0	0	0	0	0	0
Macma4_01_g04520	0	0	0	0	0	0	0	0	0	0	0	0	0	0	0	0	0	0
Macma4_01_g04530	0	0	0	0	0	0	0	0	0	0	0	0	0	0	0	0	0	0
Macma4_01_g04540	0	0	0	0	0	0	0	0	0	0	0	0	0	0	0	0	0	0
Macma4_01_g04550	9.98283	10.8098	16.6609	7.25797	9.02115	8.19002	11.0548	8.83442	5.98807	10.2329	23.1798	10.1288	8.17115	8.05032	10.2236	9.87712	10.4252	7.98662
Macma4_01_g04560	47.4895	45.8313	20.0812	51.39	59.984	50.4908	50.5968	62.4692	73.4521	47.3711	45.2841	79.626	68.3983	55.9508	68.4083	75.0366	60.0249	66.815
Macma4_01_g04570	8.90769	9.85482	16.219	8.54055	6.5748	11.0966	11.0476	8.51626	8.19284	11.0148	15.1146	13.1233	10.381	9.81509	9.253	8.1348	8.37895	8.56346
Macma4_01_g04580	17.8115	20.7446	29.1272	18.4355	19.1584	24.7906	29.1812	20.4439	17.8608	18.398	31.1785	26.0063	21.9859	21.5057	20.7207	18.353	27.1328	20.8859
Macma4_01_g04590	0.769987	0.660177	0.993938	0.76461	0.289214	0.318147	0.237986	0.358289	0.444358	0.294288	0.365222	0.293606	0.543981	0.410141	0.396557	0.523832	1.13596	0.558487
Macma4_01_g04600	0.39004	0.541887	0.121551	0.114677	0.129317	0.287381	0.0124457	0.410775	0.634692	0.069622	0.0697873	0.225431	0.324308	0.140526	0.368608	0.42864	0.231533	0.142289
Macma4_01_g04610	0	0	0	0	0	0	0	0.128705	0	0	0	0	0	0	0	0	0	0
Macma4_01_g04620	7.07215	8.11608	12.3201	8.35505	2.58633	9.18798	6.82737	5.9621	5.65309	7.16112	7.20205	3.65994	4.35499	6.09482	5.0334	6.79701	7.54135	7.025
Macma4_01_g04630	7.69093	11.8987	20.8772	6.0994	0.238588	13.5404	9.22221	8.18506	7.36012	9.36414	15.1515	7.18376	5.32901	4.90019	2.87567	10.4539	7.95949	8.38756
Macma4_01_g04640	16.5648	31.8602	57.2399	18.4026	32.2258	23.484	31.5868	25.1118	15.0114	12.3961	44.236	25.4597	17.8639	20.5909	14.3508	16.9039	23.3738	17.9814
Macma4_01_g04650	20.0582	20.0772	17.0596	21.0959	23.156	21.3247	21.7104	19.9812	22.4315	18.8153	19.997	19.1866	24.4573	23.7668	21.9023	17.5679	17.1447	18.9496
Macma4_01_g04660	2.52855	2.58672	1.99999	1.88689	1.6607	2.46807	2.41742	1.47266	1.28463	2.21288	1.92686	0.894046	1.86548	1.89488	1.02019	1.94137	1.76544	1.73592
Macma4_01_g04670	2.51055	3.05005	4.19242	1.5915	2.09964	2.87392	3.08869	2.77214	1.46429	3.36471	3.42968	2.24086	1.64366	2.31733	2.89501	1.44968	1.52392	2.13732
Macma4_01_g04680	16.4403	24.3829	25.4336	14.6199	15.6866	15.5192	23.713	22.9318	14.5908	18.4701	29.1933	19.0074	16.897	17.8302	16.6159	14.7309	17.974	16.2473
Macma4_01_g04690	22.7443	26.3594	17.3924	20.3009	9.58145	18.2897	8.51553	22.8713	15.7942	11.7049	11.7934	15.2371	11.8873	14.3462	8.19982	13.4005	13.5158	19.3476
Macma4_01_g04700	15.7448	16.0207	14.075	13.6793	17.2988	13.7593	13.2668	13.7187	13.8467	16.444	17.2166	16.2917	13.5165	16.6646	16.5763	11.5914	12.7872	12.1294
Macma4_01_g04710	22.8166	37.3467	43.4641	33.3903	33.4692	28.5307	23.3375	33.8344	22.6816	25.2399	41.0032	34.4803	27.1966	29.1321	22.3512	24.0491	25.8987	30.8909
Macma4_01_g04720	4.67355	22.5091	11.0868	11.1546	7.50036	13.4096	7.97867	11.4701	10.5074	2.93055	17.0066	12.6874	15.0429	9.22284	8.32447	9.13569	9.05649	16.2538
Macma4_01_g04730	8.25135	9.44768	7.12556	7.86082	8.43797	8.1174	8.24557	10.6231	8.50216	6.21925	9.29331	14.9386	10.3943	8.64765	9.97701	8.73679	8.49804	6.826
Macma4_01_g04740	61.7846	48.2594	40.026	49.5014	103.733	56.7899	69.0462	49.3876	61.4161	87.789	51.5237	60.1285	70.0143	71.583	81.9101	60.4816	45.0356	53.9696
Macma4_01_g04750	0	0.42836	0.16815	0.0566574	0	0	0	0	0.010907	0	0	0	0	0.0999769	0.0200954	0.0363042	0.148709	0.0112479
Macma4_01_g04760	81.3295	104.858	89.6666	82.8513	100.524	88.8085	107.984	104.062	95.1479	81.7628	105.569	147.34	111.455	96.4432	97.8476	92.6699	101.512	99.9777
Macma4_01_g04770	0.841724	1.54507	0.705531	2.0801	1.00081	1.19545	0.62608	0.82126	1.60174	1.10458	1.02619	2.12951	2.61446	1.7401	2.09036	1.33286	1.23192	0.688252
Macma4_01_g04780	18.1196	8.46842	7.11336	12.7208	18.8851	13.1925	12.3102	9.39237	11	20.3452	8.6368	7.00975	14.0917	12.1874	14.6696	13.4383	9.46811	15.9441
Macma4_01_g04790	21.1619	19.4792	18.0401	25.6099	25.617	20.7511	27.3771	26.3993	23.3153	24.6697	25.4036	25.0238	24.7955	28.9766	27.1556	29.1163	19.8208	25.9506
Macma4_01_g04800	31.179	42.7225	25.795	56.2784	52.077	59.9999	47.5663	86.0511	27.4257	13.0638	21.4404	35.3826	21.7158	28.6643	16.0217	39.4863	66.5179	24.6933
Macma4_01_g04810	0.278003	0.198198	0	0.332056	0.066568	0.399423	0	0.697797	0.639233	1.03217	0	0.430048	0.939056	0.455732	1.00108	0.922003	0.268168	0.197763
Macma4_01_g04820	5.89253	4.79742	7.07842	4.61296	6.48765	6.83667	7.43525	4.15616	4.23489	6.47974	6.01792	4.41962	5.86853	5.96359	4.68084	5.29796	6.14861	5.95669
Macma4_01_g04830	0	0	0	0	0.187817	0	0	0	0	0	0	0	0	0	0	0	0	0
Macma4_01_g04840	141.688	187.681	158.968	118.258	429.155	127.522	161.541	192.411	128.366	155.859	203.001	145.574	139.497	154.209	190.852	127.165	117.823	114.14
Macma4_01_g04850	0.720073	0.855611	1.45861	0.258023	0	0.517286	0	1.15017	1.65572	0.0835464	1.6749	0	0.567539	0.927473	1.14396	5.51109	1.30237	0.768359
Macma4_01_g04860	1.85382	4.44886	5.17107	5.98215	6.28736	2.94004	2.42044	4.57688	2.20818	2.48234	6.27715	6.95773	4.35258	5.80752	4.68642	5.76834	3.16606	3.11313
Macma4_01_g04870	0	0.0278359	0.118634	0	0.168284	0	0	0	0	0	0	0	0	0	0	0.0149412	0	0
Macma4_01_g04880	0	0.0354246	0.415184	0	0.118979	0.0356951	0.0927516	0.0226763	0	0.0115302	0.127133	0	0	0.0116363	0	0.0126763	0.0718956	0
Macma4_01_g04890	0	0.0342394	0.0948512	0.0275345	0.0137998	0.0138003	0	0	0	0	0	0	0.025956	0.0472374	0	0.088216	0.472533	0
Macma4_01_g04900	0	0	0	0	0	0	0	0	0	0	0	0	0	0	0	0	0	0
Macma4_01_g04910	0	0	0	0	0	0	0	0	0	0	0	0	0	0	0	0	0	0
Macma4_01_g04920	0	0.0554499	0	0	0.0139678	0	0	0.0133106	0	0	0	0	0	0	0	0.0297633	0.0140672	0
Macma4_01_g04930	0	0	0.014849	0	0	0	0	0	0	0.0136084	0.0545627	0	0	0	0	0	0.0141424	0
Macma4_01_g04940	9.13303	6.55222	10.1835	6.23564	8.85529	9.3795	11.3749	7.4676	6.12608	11.4398	11.1324	7.88111	8.03774	8.47111	8.94444	6.9422	7.11876	8.03018
Macma4_01_g04950	9.53109	10.7559	15.3215	3.10585	2.45778	6.41389	4.64299	6.40187	4.0909	8.43843	14.5522	3.67245	2.06927	1.99168	3.60295	4.21468	3.01748	5.88772
Macma4_01_g04960	38.8226	32.3145	26.4464	35.1823	61.8796	35.833	45.6694	39.1523	32.5955	58.9914	48.9554	44.0144	46.6858	45.3817	55.7137	41.3266	31.4927	35.2031
Macma4_01_g04970	0.0376066	0.0357481	0	0.215609	0.216118	0	0	0	0	0	0.804753	0.531879	0	0.528417	0	0	0.0725522	0.0356697
Macma4_01_g04980	24.4753	19.9681	20.2795	21.7429	12.1661	21.8997	24.4753	23.2372	21.4308	26.4198	28.4141	24.2911	21.9235	24.0275	22.7975	25.3387	25.3222	23.0334
Macma4_01_g04990	95.4842	88.4239	56.6026	123.843	95.4697	83.9574	98.6471	106.247	120.353	88.1164	72.1794	84.3061	99.6535	115.413	110.809	127.755	87.8857	100.889
Macma4_01_g05000	45.5147	22.3068	25.008	42.8753	19.8829	30.7517	31.5561	39.7778	39.9647	37.4595	18.6543	15.9564	23.2864	21.499	26.0007	27.2362	18.2832	24.4592
Macma4_01_g05010	6.6731	6.20442	6.05155	7.50901	7.41789	7.49593	9.0519	6.37238	6.00318	9.63003	7.67398	8.59689	9.91576	8.66927	8.55672	7.57184	6.42135	7.1764
Macma4_01_g05020	85.742	86.5989	85.2061	84.2938	111.835	78.1129	105.333	89.971	78.1187	93.4398	108.236	105.641	97.0676	103.857	99.5711	77.4713	76.5618	76.015
Macma4_01_g05030	0.606176	2.26056	0	1.1139	0.558267	0.491294	0.425533	0.723522	2.76621	0.865619	1.71366	1.1541	0.945037	0.393115	1.04697	2.09367	0.832117	1.79121
Macma4_01_g05040	1.30734	1.28905	1.87513	1.3113	0.762193	1.89778	1.7246	1.14138	0.955966	0.874302	2.84823	0.969004	1.19955	1.02688	0.646728	1.49983	1.34725	1.87156
Macma4_01_g05050	0	0	0	0	0	0	0	0	0	0	0	0	0	0	0	0	0	0
Macma4_01_g05060	65.6615	38.2879	46.7088	47.2183	47.6226	50.1974	42.2373	37.8208	52.0183	61.0962	44.4194	33.2012	44.5257	40.5031	52.0089	57.4028	42.0498	51.5234
Macma4_01_g05070	236.845	349.381	206.657	337.52	184.105	250.277	234.93	497.432	367.04	114.072	278.566	234.618	241.61	265.554	167.534	333.133	325.64	449.918
Macma4_01_g05080	96.3998	38.3998	22.5355	68.3246	61.8651	60.419	75.8094	58.708	83.8952	88.2751	25.5757	35.3741	64.6994	68.0428	82.8681	104.821	52.7721	69.4597
Macma4_01_g05090	2.43595	1.28643	0.626587	3.39913	2.29613	3.59247	1.21898	1.02347	3.12954	1.79448	0.1439	1.02536	2.61216	3.54957	3.17783	1.42046	0.820555	3.4474
Macma4_01_g05100	18.7014	15.5689	23.9543	13.2965	8.88903	19.3553	16.9776	13.5959	13.8829	19.6991	18.3882	13.487	16.1305	15.1783	16.4884	13.1397	13.3778	15.0697
Macma4_01_g05110	30.0512	15.1679	12.5248	24.8083	22.065	21.6519	16.6577	16.5363	23.2368	32.5836	22.0214	18.0129	23.1165	26.9671	29.8841	31.5823	18.9833	24.5622
Macma4_01_g05120	17.9838	21.2207	15.4086	17.3829	11.1	23.4392	31.2379	26.2548	25.8407	20.6567	16.2596	17.1008	24.3299	25.3234	25.3306	21.2024	18.2829	22.8821
Macma4_01_g05130	7.64372	1.39862	1.56288	2.09173	0.515576	3.16232	2.38177	1.89977	6.30417	4.53007	0.901488	1.45919	2.94156	2.11781	2.21962	5.3466	2.28468	3.36973
Macma4_01_g05140	19.4941	9.02958	3.25656	12.7109	3.78357	14.5893	7.13375	7.12728	10.5787	14.2061	2.53	6.38277	7.5468	8.81209	8.1885	8.69972	8.86165	7.73759
Macma4_01_g05150	0.807718	0.274215	0.292169	1.04746	0.442077	0.497355	1.24449	0.526598	1.4858	0.32131	0.161036	0	1.61103	1.13494	1.90646	0.588751	1.55828	0.875562
Macma4_01_g05160	11.9902	7.89937	7.90558	12.1945	8.12994	9.23891	10.5137	7.15148	10.4547	14.5452	7.92497	9.3395	9.83792	10.8425	13.051	10.3276	7.27169	11.0348
Macma4_01_g05170	25.5045	15.9164	15.8297	20.5071	18.2964	21.6983	23.9763	20.2035	21.0739	26.4159	14.5657	19.5205	23.7907	22.9443	27.8247	25.8943	20.5769	22.3471
Macma4_01_g05180	0	0	0	0	0.0981439	0	0	0	0	0	0	0	0	0	0	0	0	0
Macma4_01_g05190	11.6551	13.1384	21.5027	8.58389	5.78223	14.0964	19.0513	10.2426	7.638	14.7997	20.7473	10.6217	9.30163	10.5391	11.7108	8.8134	10.9781	10.5617
Macma4_01_g05200	23.7057	18.3642	20.7201	19.9111	9.89827	21.0094	21.1368	23.0617	25.1398	28.6204	20.9178	19.0904	24.1649	22.7199	26.197	25.4823	20.3037	23.1249
Macma4_01_g05210	137.809	28.6996	19.0503	80.5124	137.669	77.5308	101.501	45.3386	92.9121	195.557	29.9232	36.5421	110.866	107.62	175.689	113.107	68.8495	103.958
Macma4_01_g05220	12.9457	7.06467	6.38219	8.77512	15.8876	12.3111	10.6402	7.14714	9.50326	20.6606	7.47512	11.7383	11.7695	15.165	16.4177	9.39025	7.44612	8.7807
Macma4_01_g05230	27.2353	19.275	8.14873	21.2456	24.1075	20.9842	21.2874	23.3206	31.4496	28.6605	15.6288	14.8966	20.958	24.7487	29.064	30.9549	18.9828	22.3779
Macma4_01_g05240	29.9746	18.51	14.452	30.7773	15.1651	22.932	23.3583	24.0666	25.7488	22.7557	14.5531	11.0048	24.3834	23.2045	24.3694	28.145	19.4301	25.615
Macma4_01_g05250	12.5237	9.67779	13.1822	10.364	11.5427	11.22	10.1821	9.25733	9.83386	12.2598	12.5311	9.72383	11.3417	9.84399	11.134	10.5369	11.8574	10.6076
Macma4_01_g05260	3.33365	3.33142	2.83098	3.62652	9.86551	4.68322	4.70169	3.40945	3.29412	4.1892	4.56498	5.92381	4.51195	5.05251	4.39618	3.34083	3.00958	3.43761
Macma4_01_g05270	2.08465	3.76789	1.05569	4.08215	5.27294	3.86697	2.4359	4.99805	4.37481	2.69806	2.28104	5.56713	5.24984	6.73849	4.86354	2.41196	4.14925	4.19128
Macma4_01_g05280	0	0	0	0.0137884	0	0.0552859	0.0718287	0	0.0132718	0.0803626	0	0	0	0.0540684	0.0244525	0.0589008	0	0.0273733
Macma4_01_g05290	16.9602	18.599	21.3484	13.8943	14.5288	18.1171	26.5974	19.2177	14.0799	14.2309	25.2608	16.8429	17.0165	18.8296	15.415	17.3074	15.3728	17.7859
Macma4_01_g05300	13.1185	13.8309	11.817	15.9643	16.603	15.9275	14.6415	14.0858	16.5927	10.0106	15.3253	18.0616	19.4648	17.1932	14.9531	13.8273	12.2193	13.1682
Macma4_01_g05310	13.2856	1.76299	2.53623	5.74412	9.15839	7.36846	7.8011	2.93112	7.85202	17.4425	2.66556	3.55951	8.65199	8.27428	11.6664	7.83553	4.52478	7.39925
Macma4_01_g05320	8.55513	5.29952	4.12708	7.03189	7.72812	8.2527	6.96305	6.71689	6.04128	10.8575	5.45109	8.11786	9.1853	8.10894	7.28302	5.62708	4.75201	7.84531
Macma4_01_g05330	9.04607	7.14329	7.03386	9.2735	7.31694	11.3596	11.0948	6.79391	7.68137	10.4792	9.55967	6.70555	8.24461	10.0585	9.62604	8.86779	8.4512	8.36058
Macma4_01_g05340	112.353	89.5541	78.6397	95.8365	115.599	89.914	106.581	77.2118	87.3058	178.238	105.198	87.2283	113.384	114.501	151.211	103.498	75.2233	100.153
Macma4_01_g05350	43.8684	51.9792	43.4095	46.0405	61.443	45.5608	58.566	53.3362	43.9551	49.7152	50.6673	57.1512	50.2139	58.0453	57.8188	52.4847	33.7235	48.039
Macma4_01_g05360	11.8408	4.1048	5.42243	6.62811	11.9401	9.63852	8.00796	4.1554	6.27199	18.9525	7.38087	3.81708	8.41296	9.18831	12.847	7.07845	5.12668	9.85955
Macma4_01_g05370	0.149065	0	0.0754881	0	0	0	0	0	0	0.0691809	0	0	0	0	0	0	0.287583	0
Macma4_01_g05380	8.28995	10.9665	6.99321	13.0093	11.5889	11.2991	13.5397	12.881	14.7318	11.4115	8.63936	13.6801	14.0572	13.5239	9.66484	12.1262	8.53952	11.0041
Macma4_01_g05390	23.5483	21.0696	20.4321	21.3539	23.3555	20.182	22.7525	17.3585	16.555	27.3184	25.1202	26.164	21.5538	22.13	25.9031	15.9013	14.7231	20.4754
Macma4_01_g05400	10.1914	10.0988	5.08485	9.59459	6.93379	8.39291	12.433	12.6144	12.8324	9.70397	7.73263	10.3052	11.9239	12.7348	13.9722	10.2657	7.11012	9.07793
Macma4_01_g05410	19.4209	21.3219	16.6625	21.4716	19.6775	26.8655	24.8341	14.9428	16.9766	38.2504	23.7439	18.7633	26.3851	27.9277	41.4098	24.077	13.8956	19.8669
Macma4_01_g05420	18.9206	9.2054	11.2352	13.0361	27.1833	14.6097	15.4745	11.4518	12.1363	25.6996	15.5438	12.514	14.3637	15.0003	19.8969	14.3554	9.27664	14.743
Macma4_01_g05430	11.7809	11.4883	10.3376	9.93495	12.0985	13.1203	14.5659	11.2396	9.66786	17.1449	16.4651	15.8787	13.8479	15.6022	17.4144	10.7913	9.41703	11.6919
Macma4_01_g05440	63.432	117.517	85.8285	99.8077	81.4387	111.122	77.1225	119.333	89.0011	44.7773	87.7812	85.0654	86.0423	67.3844	71.6501	79.3972	65.5461	58.4103
Macma4_01_g05450	16.3921	20.9374	21.3089	12.3786	4.26807	15.3352	10.9059	14.3226	12.881	9.89722	18.8642	12.2953	15.2528	12.1649	9.00751	11.1409	15.2595	15.1252
Macma4_01_g05460	12.8479	13.0079	15.1942	12.3736	12.0145	15.6073	15.8308	12.9989	12.9822	17.2178	14.8066	14.2466	15.499	14.1717	17.9499	14.3263	11.3423	14.9743
Macma4_01_g05470	0.344184	0.0934787	0	0	0	0.0156987	0	0.0149596	0.0452233	0.273833	0	0	0	0	0	0	0.0158099	0.13991
Macma4_01_g05480	5.1701	5.1583	18.8539	4.58641	1.69157	9.83604	16.4481	5.25195	2.84264	4.5477	6.75824	4.09171	3.05337	6.63087	2.18425	5.4358	11.6093	6.03858
Macma4_01_g05490	14.1781	23.6847	26.2914	13.8467	13.6132	17.5413	20.6134	14.1145	10.9948	14.8052	23.5053	30.902	19.9706	14.4858	17.6073	13.2627	14.347	14.4697
Macma4_01_g05500	8.844	6.20256	8.28962	6.79978	4.20274	7.86139	7.46929	7.17997	5.83409	5.9721	8.08042	5.28548	4.60779	6.26136	5.56709	12.4819	10.7242	8.66883
Macma4_01_g05510	16.6423	15.027	18.1227	16.3009	13.943	16.4853	15.348	11.5569	13.4588	11.823	13.7205	10.9243	8.50272	14.8438	10.6639	12.4567	9.94658	11.6501
Macma4_01_g05520	5.09321	3.12467	1.90243	1.34614	0	1.55696	0.869072	2.67058	2.82398	2.91698	0.53773	1.43686	1.36657	2.09791	0.94878	2.50658	7.70056	2.36405
Macma4_01_g05530	0.0562173	0	0.142345	0.0268591	0	0.188465	0	0	0.0517059	0	0.0261524	0.0745402	0	0	0	0.028684	0	0
Macma4_01_g05540	0	0	0	0	0	0.106783	0	0	0	0.0517394	0	0.147819	0.10042	0	0	0.0568827	0.107539	0
Macma4_01_g05550	10.004	5.61221	5.2945	7.95297	9.93525	6.47975	6.56484	7.29733	7.99443	9.3808	6.29415	4.47587	7.71861	6.77873	8.64992	7.9285	5.43803	8.67205
Macma4_01_g05560	4.13738	1.98761	2.86121	3.23078	3.32364	3.43029	2.60206	2.23333	1.9436	5.34753	3.12508	2.96906	4.08746	4.54246	4.12751	2.81471	2.46756	2.97486
Macma4_01_g05570	3.22723	7.13784	4.53075	7.14457	9.30377	2.96875	4.9837	6.09541	7.40592	9.8763	8.68087	6.04438	10.7069	12.1822	11.8852	8.37996	6.13365	6.63725
Macma4_01_g05580	0	0	0	0	0	0	0	0	0	0	0	0	0	0	0	0	0	0
Macma4_01_g05590	103.236	143.357	81.061	136.079	135.445	109.666	99.9845	135.419	122.528	112.95	126.798	131.665	136.929	135.337	129.733	117.679	107.122	121.46
Macma4_01_g05600	3.78325	7.02659	0.648451	4.50493	5.96501	4.01399	5.60137	4.62187	5.51389	2.37709	3.41164	6.94567	6.55348	3.70751	6.01648	3.32613	2.41422	4.30607
Macma4_01_g05610	0	0	0.0950591	0	0	0	0	0	0	0	0	0	0	0	0	0	0	0
Macma4_01_g05620	13.0454	9.23558	12.1537	10.7747	12.2022	10.8314	12.9314	9.32307	10.4155	15.4831	12.6464	11.56	12.229	11.949	14.2152	11.3098	9.27889	10.3443
Macma4_01_g05630	1.03288	2.48042	4.10189	3.8959	1.32774	1.40589	1.87166	1.8855	0.949988	0.37844	2.09901	1.15328	2.03214	2.7244	1.49696	1.05402	2.75303	3.84137
Macma4_01_g05640	10.1098	10.0892	11.7386	9.23902	5.27899	8.1752	6.45383	8.7389	7.44455	4.91119	9.31825	7.60025	5.87242	7.99516	6.48445	10.1881	8.14194	8.72277
Macma4_01_g05650	7.46571	7.13122	9.04191	8.02267	6.34073	9.65031	8.51895	5.96523	7.43324	8.94801	7.90149	6.85562	7.99799	7.32164	7.71765	8.34586	8.34358	7.87181
Macma4_01_g05660	0.246767	0	0	0	0	0	0	0	0.226964	0	0	0.109065	0	0	0	0.251818	0.119018	0
Macma4_01_g05670	0	0	0	0	0	0	0	0	0	0	0	0	0	0	0	0	0	0
Macma4_01_g05680	0.681587	1.15183	0.843731	0.940748	0	1.74093	0.879612	0.622112	1.32343	1.96824	2.11383	0	1.50076	1.98636	1.02667	1.93205	0.511368	1.43663
Macma4_01_g05690	0.0682057	0	0	0.0651736	0	0.0653301	0	0	0	0	0	0	0	0	0.346739	0	0	0
Macma4_01_g05700	0	0	0	0	0	0	0	0	0	0	0	0	0	0	0	0	0	0
Macma4_01_g05710	0.244413	1.52677	0.760321	0.133456	0.0836069	0.183942	0.724187	0.350563	0.0802852	0.226864	0.341104	0.123457	0.14153	0.376136	0.310632	0.160339	0.0168404	0.0993533
Macma4_01_g05720	51.5673	54.5294	68.4841	51.5071	66.8357	57.3077	75.4424	54.0763	48.1253	58.3451	72.1486	62.9061	53.7175	57.0385	64.8421	66.3965	66.7481	56.4819
Macma4_01_g05730	77.4937	71.4331	56.5964	76.6584	115.545	69.1786	96.9146	84.8896	80.9887	93.0014	82.6613	103.072	99.1701	95.6366	112.012	81.3661	66.1696	75.1821
Macma4_01_g05740	19.6157	17.1605	20.8823	17.6377	26.0449	22.023	27.2615	17.8605	15.7699	24.0548	24.3451	19.5858	19.1093	18.8779	19.9765	19.798	21.5459	20.4048
Macma4_01_g05750	8.98455	14.6722	18.0828	9.21802	10.2603	9.87455	11.6347	9.54104	7.25708	9.59571	13.6374	10.9201	9.90868	10.6552	6.97813	10.1382	11.3611	7.97554
Macma4_01_g05760	106.816	121.08	94.7258	94.6155	145.067	81.0375	112.869	96.1288	118.587	146.838	112.153	96.4061	108.018	79.8374	133.589	110.117	95.1531	95.3673
Macma4_01_g05770	26.0126	24.6255	21.5641	25.8437	31.3997	26.8784	26.843	28.7678	24.9083	22.5076	19.0468	21.1197	26.2237	24.8011	24.7423	27.5268	35.0433	23.8955
Macma4_01_g05780	0.242103	0.936995	0.577989	0.87579	0.795042	0.927585	0.22955	0.631364	0.0318106	1.30017	0.884925	0.963036	1.19943	1.19874	0.835177	0.494118	0.600527	1.54183
Macma4_01_g05790	0.732074	0.278359	0.222438	0.384742	0.771302	1.57772	0	0.534555	0.673325	0.951315	0.136225	0.16178	0.626455	0.720056	0.465208	1.08324	0.56494	0.45134
Macma4_01_g05800	0.52921	0.56594	0.133999	0.252842	0.38016	0.253449	0.219525	0.60379	1.09517	0.736819	0.184642	0.116949	0.595867	0.247868	0.0560492	0.472537	0.63811	0.125488
Macma4_01_g05810	10.1839	5.41235	4.03202	7.75545	9.35513	9.47372	10.4075	9.37975	10.3601	9.66751	5.67072	11.0753	9.22887	10.2191	9.0732	7.85724	7.33793	8.13729
Macma4_01_g05820	0.249099	0.118395	0	1.36865	0.59647	0.596492	0	0.341044	0.40094	0.289017	0	1.10096	0.224379	1.8084	0.0527647	0.381297	0.300358	0.413471
Macma4_01_g05830	308.656	170.977	138.008	268.537	301.097	258.871	157.12	208.137	262.175	346.037	146.833	141.727	256.249	236.088	270.905	263.779	190.717	276.028
Macma4_01_g05840	6.42952	4.81077	4.83561	4.95754	4.23759	5.18286	4.64756	3.83485	4.62545	8.80409	7.52198	3.54509	4.73066	5.0389	6.20278	6.36624	4.20635	4.95116
Macma4_01_g05850	0.368597	0	3.31324	0.0880528	0	0.926774	0	0.546704	0.169508	0.256598	0.042868	0	0.0830047	0.345282	0.0390385	0.987372	2.57779	0.131105
Macma4_01_g05860	18.6033	10.8069	14.4585	13.2396	24.5311	13.6117	20.1766	12.5876	11.3475	29.4688	16.8278	14.8171	15.0116	18.1224	24.6013	17.0395	13.5212	17.2469
Macma4_01_g05870	18.1112	6.65997	10.3175	8.45981	13.4839	10.8148	10.7365	6.36491	11.7821	21.7313	6.21351	9.77764	15.6838	11.6005	19.5221	11.0423	7.20116	9.70366
Macma4_01_g05880	1.08783	0.55562	1.21689	3.97171	0.699801	2.44162	0.929436	1.43749	0.597331	1.22071	3.15721	0.588435	0.819001	1.29279	1.018	0.894704	1.06501	1.4476
Macma4_01_g05890	1.82055	1.64818	2.98536	3.56208	0.830349	2.15899	1.36654	2.84862	0.478415	2.81639	4.43627	2.22234	1.71798	2.5987	1.98326	5.83886	6.18832	0.986735
Macma4_01_g05900	2.92974	7.92167	17.606	15.4284	5.54988	9.35408	7.29182	9.92387	0.538926	5.4992	30.6506	3.68321	3.22545	9.02611	2.31685	0.398628	4.52175	3.76688
Macma4_01_g05910	1.40334	0.733693	0.781732	2.58133	4.67082	1.44499	1.89191	1.34493	1.87154	3.02849	2.74191	1.73668	2.90737	4.63386	2.73477	4.5468	1.72595	1.59727
Macma4_01_g05920	3.2174	2.94759	3.06974	4.21055	6.7662	4.39931	5.82206	3.29841	3.75261	3.61396	3.16701	3.0089	4.17916	3.64724	4.22737	4.8773	5.95976	3.5603
Macma4_01_g05930	8.00579	10.3968	9.87924	10.4762	16.4314	10.9798	19.402	9.203	11.8369	7.0527	13.9799	13.5144	11.4623	14.6909	12.6865	11.5234	21.1007	9.38895
Macma4_01_g05940	7.77644	12.8477	18.7733	7.09992	5.02505	9.47654	15.2672	11.1937	4.21304	6.97089	21.1358	8.5572	5.12161	5.26383	4.25344	5.612	7.77106	8.28528
Macma4_01_g05950	0	0	0	0	0	0	0	0	0	0	0	0	0	0	0	0	0	0
Macma4_01_g05960	7.06526	6.00079	7.8545	5.83238	10.8514	7.76848	7.54372	5.47571	4.86409	6.28634	8.8101	5.8019	5.51683	6.08967	7.17295	6.03667	5.18205	5.63074
Macma4_01_g05970	2.66057	1.75366	2.74552	1.41505	1.35829	3.2456	2.3947	2.25659	2.0546	3.85574	2.51043	2.70681	1.82002	2.56281	3.83863	1.98504	1.54955	2.14263
Macma4_01_g05980	0	0	0	0	0	0	0	0	0	0.451891	0	0	0	0	0	0	0.0782706	0
Macma4_01_g05990	0.475716	0.423944	0.521967	0.482979	0.256299	0.778419	0.50978	0.506573	0.401078	1.53626	0.73768	0.236537	0.642762	0.631302	0.98248	0.505681	0.497127	0.517017
Macma4_01_g06000	5.47289	4.31399	4.06947	11.3431	15.0891	8.92458	4.04486	6.8334	8.13544	7.8256	9.11718	6.72008	8.8441	11.0206	6.27807	6.46985	5.21421	7.74997
Macma4_01_g06010	2.93586	2.41665	3.35058	2.80535	2.13955	3.11775	4.28892	3.31076	2.50459	3.2681	3.64205	2.07801	2.56786	2.89962	2.99224	2.70287	2.46261	2.78465
Macma4_01_g06020	2.32238	2.12585	3.92026	2.13695	1.15338	1.81253	1.85535	1.49166	2.13601	1.83628	3.68127	1.29255	2.16939	2.90064	1.74909	2.63324	2.82101	1.95801
Macma4_01_g06030	59.3006	55.2217	42.3782	57.0741	79.8785	57.7835	71.1398	57.9439	59.8824	74.7086	63.6459	82.435	82.4347	77.1367	83.1432	55.9543	46.9901	61.9265
Macma4_01_g06040	4.6499	6.85492	8.12192	4.95152	6.73715	5.88815	5.9827	5.91663	3.18943	4.97441	8.01095	7.97675	3.76251	3.93127	4.49071	4.66465	5.41668	4.54123
Macma4_01_g06050	24.6998	39.445	39.2759	26.257	20.3159	26.941	36.9619	26.7434	24.3363	26.2793	38.2917	39.6277	32.4831	26.3477	33.5369	26.9697	24.094	21.7584
Macma4_01_g06060	1.546	4.13264	7.7976	1.37813	3.67707	1.92805	3.20222	1.67627	0.916146	2.1862	4.2766	2.61395	1.14958	1.03027	0.958256	1.18588	2.23196	1.36796
Macma4_01_g06070	0.720073	0.317798	0.208373	0.810931	0.591162	0.517286	0.405375	0.422511	0.68594	0.907075	0.0957083	0.0681976	0.463297	0.698616	0.653689	0.104973	0.372106	0.634201
Macma4_01_g06080	0	0.0574594	0	0	0	0	0	0.027586	0	0	0	0	0	0	0.0256078	0	0	0
Macma4_01_g06090	0	0	0	0	0	0	0	0	0	0	0	0	0	0	0	0	0	0
Macma4_01_g06100	0.747481	0.957688	2.2712	1.16972	1.02722	1.38005	0.557221	0.8899	0.567931	0.814474	1.48163	1.11081	0.83919	0.771235	0.541545	0.375863	0.53294	1.05834
Macma4_01_g06110	10.6587	2.84849	2.30506	7.84706	6.88468	7.24826	5.8847	3.61794	7.25656	17.6919	3.42327	3.42001	6.59426	6.43129	11.7146	9.25115	4.1163	8.36481
Macma4_01_g06120	3.56722	2.00018	1.948	2.05775	1.63749	2.12567	2.31848	2.34068	3.08439	3.09747	2.44715	1.27874	2.75419	2.71022	3.05032	2.29821	2.0773	2.80658
Macma4_01_g06130	1.03288	0.671782	1.19753	0.753207	0.546715	1.36684	0.608855	0.831107	0.937489	0.504587	0.986282	0.756841	0.440705	0.318271	0.449087	0.513141	0.681704	0.592964
Macma4_01_g06140	50.7328	44.4019	54.2457	47.1355	59.5858	47.7136	29.359	45.5146	40.458	38.3512	32.8768	65.6894	39.2324	44.9088	36.154	30.3444	41.144	35.062
Macma4_01_g06150	22.8069	22.6748	25.6102	21.5825	18.3885	27.2803	25.8683	18.8809	18.7473	27.6889	24.8588	27.0264	22.5782	21.9061	24.085	24.0608	27.3672	20.7179
Macma4_01_g06160	58.7397	60.5034	41.433	56.0825	60.963	50.6853	76.6021	64.0031	51.2814	58.6543	65.5551	85.6594	63.9003	72.6293	62.2475	48.7198	57.4973	50.0311
Macma4_01_g06170	4.4579	2.06835	2.19034	2.78911	1.02932	2.77039	2.46561	2.25243	3.50221	2.83243	1.97507	1.24316	1.63728	1.77725	1.98974	2.72136	2.02211	2.37842
Macma4_01_g06180	88.1062	21.0167	5.9472	57.2942	63.0801	50.804	64.8392	33.214	81.061	124.922	7.8486	43.2054	86.9614	72.6684	99.2938	82.9329	50.2596	63.8006
Macma4_01_g06190	9.29485	9.06803	14.0084	8.6798	6.22972	9.77623	10.58	9.53918	8.85571	9.32922	9.74447	8.45208	8.02194	8.81106	8.91165	10.0637	11.1753	8.78449
Macma4_01_g06200	1.45419	0.540458	1.40639	0.908948	1.2881	2.01077	2.05004	0.858251	0.774335	1.38022	1.11901	0.270617	1.1326	1.18809	1.16727	2.13109	1.22344	1.64893
Macma4_01_g06210	0.723789	1.75132	1.28842	2.0958	0.735262	1.34453	1.27374	1.22117	1.75504	0.508954	1.46927	0.969386	1.81759	1.62311	1.5796	0.917659	2.81389	2.68363
Macma4_01_g06220	1.3543	2.96096	27.0904	1.90879	0.356717	1.84851	14.7187	1.35974	1.6193	0.565677	1.79556	1.34678	1.00642	2.1884	0.172122	17.6899	52.0922	1.50934
Macma4_01_g06230	3.79301	4.50238	2.8081	6.2001	0.590125	4.72118	3.17874	2.91725	3.70112	2.26967	2.59751	2.07638	3.46863	2.92183	1.87606	4.97093	7.22478	2.64802
Macma4_01_g06240	0.225833	1.32829	0.657594	0.552971	0.90577	0.189273	0.667462	1.48154	1.22029	0.327528	1.9567	1.88397	1.44938	0.317322	2.77451	2.26134	1.64744	1.87426
Macma4_01_g06250	39.0948	49.7037	33.7968	44.0297	65.1816	42.0047	34.8897	39.868	44.0884	31.1705	49.0446	86.8481	61.3173	54.1265	53.8746	40.507	32.0951	42.3472
Macma4_01_g06260	4.58478	2.33855	0.702198	4.61605	3.27742	4.77708	2.57908	4.55216	6.97323	6.1239	2.68427	8.06593	8.42077	4.83948	8.75464	5.52306	3.77538	5.68506
Macma4_01_g06270	26.5172	23.574	25.6922	25.485	43.5987	30.1001	36.0212	26.5411	26.096	37.0267	28.4817	31.6284	31.3596	32.8134	37.6585	28.2182	25.4016	25.3842
Macma4_01_g06280	0	0	0	0	0	0	0	0	0	0	0	0.231114	0.0785031	0	0.221528	0.0889356	0	0
Macma4_01_g06290	4.24643	1.14724	2.89743	3.54511	1.41283	3.38236	1.63169	2.89672	3.45342	3.02875	2.20418	1.38292	2.73791	3.97782	4.77202	5.01756	3.32008	3.81573
Macma4_01_g06300	1.29613	1.68678	3.64132	1.06158	1.61092	1.40406	1.02411	1.1267	0.808936	1.11713	2.78511	1.36395	0.792238	1.61886	0.784426	1.44863	2.29217	0.35125
Macma4_01_g06310	7.03201	4.25318	4.12409	4.45788	6.63076	5.75558	6.26402	4.91807	5.2005	7.47673	5.14016	3.65964	5.70752	5.21354	6.63428	5.56118	3.26332	5.32422
Macma4_01_g06320	0.2984	0.340384	0.241781	0	0	0.571638	0.346586	0.108945	0	0.0553949	0.555264	0.0527543	0	0.44724	0	0.121803	0.172706	0
Macma4_01_g06330	0.979141	0.21017	0	0.150905	0.181514	0.51431	0.104816	0.403607	0.319555	1.26065	1.32241	0.167519	0	0.710095	0.428188	0.290085	0.121871	0.359501
Macma4_01_g06340	27.0349	41.4038	52.4498	30.186	35.7025	29.4619	30.6776	33.5016	27.2628	24.6905	50.5146	44.5693	29.2828	29.9758	28.3227	27.6643	31.0714	31.1642
Macma4_01_g06350	0	0	0	0	0	0	0	0	0	0	0	0	0	0	0	0	0	0
Macma4_01_g06360	5.90786	0.427879	4.07455	5.21512	1.96703	4.17672	2.47401	2.74753	6.90863	6.68485	0.104699	1.44234	4.68806	3.16238	3.59931	5.71299	3.14794	5.33674
Macma4_01_g06370	1.0834	0.801002	1.58497	1.11192	1.9985	0.999288	1.19843	0.549368	0.221435	1.67602	1.232	0.212816	0.650591	1.2404	1.8019	0.163789	0.232238	1.29401
Macma4_01_g06380	0	0.0284427	0.818233	0.457459	0	0.114639	0.248236	0.273104	0.165121	0.249956	0.0278389	0	0.13476	0.0560573	0	0	0	0.0567604
Macma4_01_g06390	3.03358	0.275407	0.983884	0.765394	0.636615	1.40387	0.820066	0.186666	1.11292	3.08469	0.650116	0.421816	0.967135	0.957875	0.98192	1.40871	1.43025	0.840571
Macma4_01_g06400	32.5041	10.7042	9.74684	6.29577	8.22297	5.04871	10.3029	6.99781	19.5387	9.56257	8.06204	19.2724	4.42415	8.71548	4.669	21.882	11.9793	11.1352
Macma4_01_g06410	23.297	15.2684	12.0974	26.7614	2.11372	16.7361	9.34306	17.6301	24.3778	9.50282	7.45097	8.54707	10.9844	11.0395	6.65042	21.2896	34.6528	27.1682
Macma4_01_g06420	33.6078	38.8466	37.2485	37.9993	19.2649	36.6218	54.4708	50.1534	36.5758	19.5234	39.1158	35.9882	28.1778	33.2776	25.6388	42.8501	48.7392	50.7848
Macma4_01_g06430	20.36	15.9196	15.2254	16.0905	14.1344	15.8945	15.5958	14.7829	14.0234	13.6976	16.6356	14.8308	15.9954	15.4011	18.5738	16.4964	12.9356	15.4781
Macma4_01_g06440	6.4142	6.38989	9.33756	6.45595	3.40762	7.38892	12.4592	6.83806	5.63202	7.82707	10.1055	5.83617	7.62654	6.50518	6.56509	6.37095	8.20021	7.30061
Macma4_01_g06450	31.9304	34.7065	38.4211	36.2764	29.7253	31.9341	35.3936	30.9665	26.654	35.1974	42.9709	29.0814	37.9787	38.3819	30.2012	29.7375	28.45	33.21
Macma4_01_g06460	10.9329	8.30311	16.4534	6.64216	8.13533	10.4904	16.3489	8.30696	7.35987	9.4857	11.9212	6.16155	7.64216	8.31772	7.51522	11.0485	14.6009	8.81526
Macma4_01_g06470	0.139001	0	0.281567	0	0	0	0	0.126872	0	0	0	0	0	0	0.353323	0	0	0
Macma4_01_g06480	6.71688	5.29871	14.8763	5.4329	1.46821	3.31028	3.21403	4.3246	3.17864	3.49241	4.17491	3.69548	2.46029	3.47235	2.36146	5.71671	9.49035	4.75837
Macma4_01_g06490	0	0	0	0	0	0.0367767	0	0	0	0	0	0.0678796	0	0	0	0	0	0
Macma4_01_g06500	0.0200752	0.0238539	0	0.00479568	0.00480702	0.0432648	0.0249825	0.0137426	0.0461603	0.0139753	0	0.0266183	0.0858941	0.056416	0.0680378	0.0307291	0.0193649	0.0333221
Macma4_01_g06510	15.7041	8.10492	8.40447	9.43573	14.8626	11.3063	10.9117	10.2059	10.5133	20.7768	11.4843	9.42561	11.0064	15.6435	15.6612	11.2412	8.34469	11.3928
Macma4_01_g06520	0.722861	0.949869	0.204566	0.477414	1.03854	0.448014	0.502696	0.523947	0.87995	0.414416	0.247262	0.469835	1.34056	1.31444	0.936722	0.564091	0.26661	0.514223
Macma4_01_g06530	0.429562	1.89584	0.704399	0.90889	0.626951	0.470231	0.509112	0.42942	0.856028	0.398719	0.209349	0.497243	1.85176	1.21675	1.22188	0.887147	0.365036	0.582054
Macma4_01_g06540	0.23778	0.647266	0.295563	0.537041	0.165634	0.320928	0.25107	0.217031	0.258461	0.250804	0.120672	0.229294	0.817792	0.455603	0.668508	0.419118	0.114684	0.225533
Macma4_01_g06550	35.329	19.9765	16.3453	27.4225	34.4431	29.2021	38.333	21.9031	30.0415	44.0922	25.0036	33.1519	37.8907	33.3901	51.8418	28.2474	19.4593	28.1852
Macma4_01_g06560	0.0676455	0	0.0228376	0.581745	0.0863881	0.79912	0.224483	0.246971	0.269607	0.104647	0	0	0.162487	0.274589	0.0573152	0.414181	0.587271	0.406356
Macma4_01_g06570	21.1998	18.9865	22.2836	20.2573	20.6666	24.2813	22.2442	20.34	21.0384	25.3248	19.2416	21.5953	22.176	21.7806	19.7406	23.1257	25.1584	21.3381
Macma4_01_g06580	6.84454	3.58758	4.21121	4.79823	4.28879	6.06581	3.90061	5.05038	5.08916	6.23434	4.55295	3.92984	3.83171	4.3443	3.25194	5.12424	3.11608	4.79317
Macma4_01_g06590	2.86141	1.39533	3.02983	1.5624	0.854233	2.22465	1.8498	1.67896	1.69186	1.53494	1.86704	0.739096	1.58999	2.12344	1.65302	1.3083	1.16501	2.62591
Macma4_01_g06600	37.2939	44.861	68.7697	36.4252	67.786	50.964	55.5205	38.9343	28.4915	40.4359	56.788	43.5366	34.075	40.1	38.2417	38.4846	43.5824	33.6078
Macma4_01_g06610	2.96232	21.5069	28.2109	3.49554	2.247	3.3135	1.92982	2.849	1.88344	2.49127	7.0661	2.14405	3.34886	2.57008	2.4594	3.61131	8.53419	3.20575
Macma4_01_g06620	12.9494	19.5311	20.8448	10.9879	13.0645	13.6604	11.8892	15.1604	13.2442	10.0965	17.0924	11.0804	9.89139	10.9335	7.49015	12.2983	13.0909	10.1863
Macma4_01_g06630	0	0	0	0	0	0	0	0	0	0	0	0	0	0	0	0	0	0
Macma4_01_g06640	0.0254192	0.0483262	0	0.121446	0.243466	0	0.29524	0	0.116897	0.188753	0	0	0.160277	0	0.0861497	0.207516	0.0490399	0.0482201
Macma4_01_g06650	0	0	0	0	0	0	0	0	0.173141	0	0	0	0	0	0	0	0.181588	0
Macma4_01_g06660	0	0.105528	0	0	0	0	0	0.0506634	0.0255262	0	0.129109	0	0.0249993	0	0	0.226572	0.0267716	0.0526481
Macma4_01_g06670	59.1708	47.7626	31.3967	58.3474	29.8774	73.6383	72.0659	52.8784	62.4361	98.2137	46.831	69.7389	85.3132	68.242	86.1334	61.9149	36.8412	62.7279
Macma4_01_g06680	26.5752	31.755	30.303	26.1757	27.9072	25.966	23.8776	26.6917	28.3036	22.7849	26.8772	26.7618	28.6808	31.9926	29.7211	26.7199	24.0565	25.4427
Macma4_01_g06690	4.02641	7.23733	7.08095	4.09225	1.57766	3.75147	3.52264	5.54601	4.27561	3.63538	10.6937	6.01821	4.15438	3.94316	3.41153	2.76412	4.30767	6.11045
Macma4_01_g06700	25.9972	37.3197	43.0134	33.8078	53.3215	35.5425	31.4085	38.726	35.4741	27.0715	103.403	78.546	59.6045	47.2025	49.8536	38.1152	45.1982	61.0869
Macma4_01_g06710	10.9298	5.56067	7.1201	9.36521	9.73138	9.68259	12.4308	8.0558	6.93777	7.47779	15.7072	11.4304	7.48787	16.7276	6.52161	9.68733	16.9779	6.86258
Macma4_01_g06720	0.440125	0.522969	0.200596	1.34579	1.51759	0.885295	0.511197	0.361548	0.931051	0.898751	0.0818987	0.38905	2.41834	1.19563	2.36799	1.97619	0.382099	0.939277
Macma4_01_g06730	33.3077	22.8558	21.4268	28.9675	35.89	28.6632	31.7564	27.7174	24.7471	38.5244	29.9969	24.152	29.8382	32.5658	35.078	29.2628	18.876	29.0993
Macma4_01_g06740	14.0386	15.7076	7.78297	16.9103	26.4564	14.6371	21.2605	15.5936	18.0961	21.8693	13.485	17.6393	21.6013	21.8083	23.5521	14.8439	11.617	17.0512
Macma4_01_g06750	0	0.590856	1.46893	0.19798	0.992241	0	0.343784	0.567334	0.190564	1.73083	0	2.19776	0	0.38817	1.4044	0.422864	0	0.19652
Macma4_01_g06760	0	0	0	0	0	0	0	0	0	0	0	0	0	0	0	0	0	0
Macma4_01_g06770	5.93506	4.71337	7.60906	2.9074	2.48252	4.28162	5.64068	4.32002	3.55857	6.83385	5.27735	2.45713	2.40236	3.65951	4.23303	4.33158	3.36983	3.77667
Macma4_01_g06780	6.77959	4.94453	4.77499	5.21235	4.47828	5.24352	3.47494	4.42762	4.28244	5.84074	4.83957	3.63359	4.0712	3.44911	3.82951	4.71164	3.15712	3.78803
Macma4_01_g06790	0.848782	0.373162	0.236408	0.557597	0.416645	0.752022	0.228857	0.309887	0.380575	0.97495	0.296141	0.0937854	0.525629	0.51681	0.692194	0.411424	0.34797	0.694369
Macma4_01_g06800	0.0275216	0.104646	0	0	0	0	0.0228328	0	0.0506259	0.127728	0.563336	0.0243278	0	0	0.18655	0.308934	0.477863	0.365458
Macma4_01_g06810	0.52291	0	0.0662019	0	0.250423	0.062608	0	0.0596602	0	0	0.364888	0.577785	0.471019	0	0	0.133403	0	0
Macma4_01_g06820	1.05552	4.69994	2.41944	0.743177	0.851352	1.48992	0.414801	2.23107	1.27739	2.52668	2.17087	0.441962	1.30106	2.28975	1.60038	1.81411	0.911001	1.68616
Macma4_01_g06830	2.10422	1.51646	3.3901	1.49632	2.87785	2.06238	3.13419	2.3226	1.51228	2.77073	2.46771	1.96385	2.28331	1.65024	1.85752	1.5081	2.7284	2.20936
Macma4_01_g06840	31.5797	29.8826	31.9119	26.1524	32.149	31.7836	31.876	27.4484	21.63	35.3967	35.3918	25.0177	28.4674	30.0079	32.2099	27.5631	27.7624	29.9986
Macma4_01_g06850	74.6142	76.2241	36.9347	100.819	117.599	83.6938	89.9299	115.039	98.4173	62.0307	67.3246	112.642	97.6775	98.7198	92.2606	83.8769	83.7133	94.6143
Macma4_01_g06860	207.606	103.968	85.5772	193.211	120.349	140.779	112.668	150.207	189.077	193.836	87.7557	84.8266	148.452	142.407	152.317	192.319	126.737	190.964
Macma4_01_g06870	5.08989	5.38175	13.7603	4.55684	8.04769	6.67541	7.03572	4.64575	3.21938	5.6039	10.2144	4.46462	4.0064	4.67991	3.58278	4.93837	7.98412	4.55293
Macma4_01_g06880	14.337	19.0194	12.0685	20.1538	6.46933	12.1457	12.3174	13.6094	17.4062	14.0765	11.4421	14.701	15.9563	12.7139	14.6311	19.1172	12.3546	11.725
Macma4_01_g06890	1.69916	1.13304	1.6182	0.993559	2.11327	1.55465	2.33543	1.78236	1.63277	2.40104	1.6045	1.99516	2.19301	1.16406	1.48265	1.96685	1.78582	1.22677
Macma4_01_g06900	589.974	863.218	945.304	721.72	846.841	593.547	517.437	764.077	749.234	605.095	630.682	729.042	725.215	614.901	588.802	626.661	492.025	638.083
Macma4_01_g06910	29.453	31.6586	31.9726	25.63	31.5532	25.3621	40.283	26.8673	24.9387	34.488	42.4245	40.0177	29.7981	29.6355	33.3173	27.7749	22.3075	27.2348
Macma4_01_g06920	10.5208	14.3763	5.32786	11.7496	9.25814	9.44744	9.38303	12.7837	12.2166	6.10339	7.28028	15.3449	11.9052	12.1344	15.377	11.3401	10.8463	14.22
Macma4_01_g06930	15.7928	10.9706	12.2317	14.0323	12.1832	13.8607	15.5329	14.3169	14.7226	21.126	16.3226	14.0864	15.0946	14.2918	20.6468	16.8088	11.8564	15.0811
Macma4_01_g06940	0	0	0	0	0	0	0	0	0	0	0	0	0	0	0	0	0	0
Macma4_01_g06950	15.5653	14.3445	14.3086	14.9689	21.9975	17.4717	19.8109	15.4737	14.1322	16.1419	14.9007	17.1407	16.836	18.0473	16.5886	17.9762	15.2076	17.3724
Macma4_01_g06960	21.0643	33.0784	49.6461	28.9893	4.22966	27.7053	36.1236	37.6464	16.6932	11.7639	28.1443	7.76803	8.43287	14.6024	7.52066	56.7354	38.7639	25.1313
Macma4_01_g06970	22.9778	21.1786	18.6437	22.7448	24.5009	20.6715	24.8031	26.7084	21.309	23.5668	28.5836	22.3312	24.1281	23.4271	25.3848	27.8528	19.7158	26.5506
Macma4_01_g06980	5.22926	5.76887	7.17102	3.91432	4.40796	5.99699	5.6642	4.67141	4.18632	7.16334	7.15212	4.37208	4.81966	5.51435	4.7135	4.44864	4.60521	4.00057
Macma4_01_g06990	0.223345	0.84923	3.46853	4.01934	0.677414	1.06964	1.88382	1.29109	0.239658	0.449168	1.93947	0.394852	1.57592	2.16191	1.32466	1.1016	2.19034	2.61271
Macma4_01_g07000	1.31328	9.09838	6.96622	3.06281	2.43045	1.62036	0.73867	2.11294	0.941745	1.19833	6.46148	2.00694	2.20551	2.33532	0.735532	0.840441	1.22388	1.60456
Macma4_01_g07010	0.849828	0.190078	2.83533	0.764282	0	0.861882	0	0	0.229891	0.0464006	0.0465108	0.0441887	1.0807	0.280967	0.0423559	0.357092	2.41107	0
Macma4_01_g07020	59.5447	26.3819	23.9017	41.7865	47.9819	45.6876	38.5875	36.3246	48.8583	58.7581	25.4754	26.9603	39.2127	43.0137	52.0094	54.8736	30.689	43.8402
Macma4_01_g07030	0.0677847	0.0902089	0.054923	0.0647713	0.103879	0.155824	0	0.0618698	0	0.0503341	0	0.0479348	0.0976927	0	0.0804064	0	0.0130773	0.0385761
Macma4_01_g07040	11.3098	5.2159	8.13954	6.787	9.6368	9.94869	13.1867	6.00417	8.7811	16.331	10.2201	5.24909	8.75104	8.27507	12.1073	9.07891	6.90207	8.72716
Macma4_01_g07050	1.85184	5.79056	150.738	3.65546	2.96395	3.73425	30.3226	2.4909	2.73414	14.226	8.20674	1.7231	3.07277	1.98578	3.30326	11.5623	31.7074	1.73336
Macma4_01_g07060	1.60295	0.801274	0.657798	1.26761	2.47502	0.860335	0.733713	0.55496	0.699027	2.437	1.2214	0.415307	1.50611	2.01933	2.24799	0.71917	0.453208	1.14029
Macma4_01_g07070	1.92862	1.69296	2.97207	1.79879	3.29674	2.21853	4.26422	2.29937	1.65502	2.4411	2.39538	2.18607	1.94503	1.87578	2.31431	2.08109	3.10658	2.07436
Macma4_01_g07080	0	0	0	0	0	0	0	0	0	0	0	0	0	0	0	0	0	0
Macma4_01_g07090	1.44818	1.97279	1.32816	1.87413	4.03017	2.55581	4.44634	2.87261	1.77246	2.58256	1.4641	1.86475	2.50623	2.71316	1.93233	1.53601	1.86993	1.28707
Macma4_01_g07100	76.5761	45.8737	23.6789	72.6642	57.2988	51.5828	58.5771	61.5924	96.2171	88.2236	35.7687	51.0573	75.7902	84.4978	88.5838	90.9016	50.2597	75.5967
Macma4_01_g07110	2.87715	0.293032	0.520364	3.79003	1.06293	3.93692	1.70498	1.53814	2.24932	1.06823	0.611865	1.19897	1.09219	1.40533	0.713919	1.80357	1.4075	2.76795
Macma4_01_g07120	0.528301	0.286968	0.114659	0.21635	0	0	0	0.034443	0.312367	0.0700526	0.140438	0	0.713812	0.636279	0.0639462	0.0385082	0.0364008	0
Macma4_01_g07130	0.245236	0.543939	0.0827934	1.01545	0	0.313195	0.40691	0.149224	0.902222	0.0758759	0.152112	0	0.589065	0.306298	0.554094	1.25128	0.630826	1.5507
Macma4_01_g07140	1.38281	0.721671	0.796384	0.310902	0.207758	0.908976	1.70958	0.866177	0.872829	1.48486	0.302722	0.790924	0.732695	0.43178	1.42434	0.525708	0.287701	0.48863
Macma4_01_g07150	41.4065	43.3312	46.1903	46.7219	11.7133	40.0132	34.5137	38.8207	47.7388	30.3771	39.8136	40.1218	36.6735	34.4078	32.2406	54.2919	41.946	44.201
Macma4_01_g07160	6.52322	6.69858	10.7941	7.45278	5.88228	10.0932	12.9595	7.26827	6.46125	6.30797	6.76952	10.4043	8.8826	8.87978	8.81739	8.23744	10.4067	6.97358
Macma4_01_g07170	16.9219	13.3112	11.4154	15.1312	16.6539	16.1787	14.7344	14.8218	13.4792	25.3616	13.202	16.797	15.0748	18.5274	17.2842	13.1809	10.393	14.7545
Macma4_01_g07180	10.1415	6.77344	10.1708	7.2205	12.1578	9.84092	11.759	8.8129	8.52495	13.6278	12.437	10.0779	10.0407	10.0692	11.7472	9.51486	8.18424	9.67157
Macma4_01_g07190	0.0189875	0	0.250003	0	0.327354	0	0.252042	0.0173307	0	0	0	0	0	0.0711459	0.0160879	0.0193762	0.0183158	0
Macma4_01_g07200	1.93681	0.209215	0.526077	0.790757	0.876948	1.04563	1.13209	0.33749	0.825912	2.43512	0.638895	0.373538	1.30052	1.31949	1.32775	0.799565	0.594455	0.651319
Macma4_01_g07210	12.6965	9.10374	11.0481	12.4169	7.30787	10.9242	9.42896	11.915	13.3954	13.9058	9.2987	14.4021	15.8036	12.3029	13.9899	12.1048	15.3139	11.9672
Macma4_01_g07220	6.20152	6.71287	6.6078	8.56335	4.25746	8.58391	6.54274	8.16338	7.78097	9.10019	8.67155	8.00097	8.33072	6.83342	6.37827	8.46843	6.89846	6.97014
Macma4_01_g07230	14.5952	14.8127	14.4822	17.4172	14.8201	16.4184	11.5714	14.4134	12.0108	13.3231	15.3253	14.6087	16.3198	14.5354	13.0636	12.3967	12.7344	16.3415
Macma4_01_g07240	27.7904	13.0309	10.179	19.7894	27.9176	19.3471	16.3332	16.7667	20.1696	33.4441	17.9878	10.6746	20.2316	23.0848	27.2793	21.4149	14.4945	27.9261
Macma4_01_g07250	10.199	10.0072	8.12755	9.95486	9.21427	12.1213	10.5118	9.69452	10.215	10.0329	10.6535	14.0347	11.8922	11.5027	10.6163	9.89694	9.09879	11.558
Macma4_01_g07260	19.049	19.5797	29.2192	15.405	14.5474	18.7945	20.5553	17.7547	15.9205	19.1186	22.2824	17.6072	19.0312	18.4005	18.3867	16.798	15.9401	15.5328
Macma4_01_g07270	15.3387	23.3623	20.3019	17.9046	13.5228	15.3598	21.0404	19.4094	14.9895	14.6418	25.1367	20.9543	15.9361	17.5524	15.5808	17.5203	12.3581	12.1515
Macma4_01_g07280	10.4356	10.1244	14.6798	8.84589	15.1721	12.9066	14.2356	10.6858	9.28856	13.488	13.9724	12.7624	11.6406	10.6427	12.5975	9.3992	8.48793	10.5368
Macma4_01_g07290	6.61668	7.8538	7.41067	6.99159	5.09681	6.90777	7.14493	7.06184	7.79225	7.08395	8.20824	8.88156	8.10442	6.82124	10.2633	5.78752	5.84227	7.27206
Macma4_01_g07300	0.463338	8.67669	0	4.6045	3.81657	2.79596	2.22952	5.0326	1.3637	0.387063	0.172437	2.25263	0.50083	2.12675	2.08068	2.26955	2.81576	1.31842
Macma4_01_g07310	7.88143	6.72189	10.3242	7.20853	9.05216	7.242	11.4532	7.11668	6.25551	12.344	9.35848	5.04236	7.1145	5.58064	8.16498	7.00942	6.77233	7.15535
Macma4_01_g07320	1.16536	3.57345	4.55622	2.53843	0.984164	1.9444	0.977214	1.33817	1.6481	0.616445	2.78642	1.7058	1.96398	2.34763	1.09357	2.34007	1.7285	1.47379
Macma4_01_g07330	0.132836	0.126272	0.605427	0.380793	0.127231	0.318089	0.440819	0.24249	0.549792	0.616491	0.247182	0	0	0.0622168	0.393927	0.0677775	0.512546	0.188992
Macma4_01_g07340	2.25965	0.904415	0.963631	1.47735	0	0.341745	0.493336	0.217103	0.87508	2.64936	1.21717	0.525638	0.964143	0.89125	1.61227	1.09227	1.37666	0.789626
Macma4_01_g07350	4.3749	5.8941	4.88076	8.23511	4.67864	6.01787	3.77965	6.09481	5.02221	7.34299	6.85545	4.49236	6.42965	6.96381	5.72743	5.65609	5.20377	7.37876
Macma4_01_g07360	22.2928	11.5588	6.37617	20.1069	15.8592	16.3967	18.6021	23.2206	28.277	23.2136	5.53636	14.2553	22.5275	17.4494	25.0993	29.3494	14.8491	20.8174
Macma4_01_g07370	0.113402	0.970183	1.4357	0.487624	0.814628	1.08621	0.423369	1.24208	0.62581	0	0.422039	0.551332	0.817189	0.424916	0.624548	0.925787	0.711037	0.484027
Macma4_01_g07380	10.4253	10.6488	13.9202	10.0392	10.8692	10.5595	10.892	12.19	10.8692	11.5851	11.1155	13.5084	8.7783	8.84084	8.99784	9.74664	8.776	11.1628
Macma4_01_g07390	0	0	0	0	0	0	0	0	0	0	0	0	0	0	0	0	0	0
Macma4_01_g07400	4.67617	1.69812	0.266074	0.9037	0.402593	0.654239	0	1.96622	2.17461	2.63351	0.733268	1.62554	0.85189	0.689049	0.712281	1.34042	1.01365	1.79406
Macma4_01_g07410	7.28164	3.34511	4.71562	5.27665	2.17787	6.84501	4.60379	2.94016	5.07898	7.46233	6.47264	4.73774	5.3155	4.81784	7.59165	6.27051	4.0473	5.058
Macma4_01_g07420	36.2377	35.8449	25.6201	35.9196	39.836	34.0901	36.1645	46.2307	49.5074	40.352	22.1669	36.7645	45.2531	33.5598	35.09	48.5655	34.6719	37.9423
Macma4_01_g07430	0	0.0485509	0	0	0	0	0	0.0932364	0.187905	0	0	0.180591	0.184026	0	0	0	0	0
Macma4_01_g07440	4.29564	7.21777	7.1695	4.71171	8.8662	5.47639	6.57546	6.07449	3.61704	5.50347	8.02151	10.8299	6.34902	6.60264	5.86957	6.79145	7.67455	6.74284
Macma4_01_g07450	28.6329	14.8367	12.9081	22.2151	19.8083	21.1208	24.9553	20.2115	23.2149	32.4413	17.4464	19.5603	25.1326	25.0725	27.0291	24.2962	18.5383	24.4423
Macma4_01_g07460	8.41305	4.82985	7.31562	5.98726	11.2793	9.28742	8.71392	5.68127	5.77249	8.67344	7.16801	6.76899	8.28658	7.44952	7.20719	7.5715	7.71613	7.99446
Macma4_01_g07470	1.11181	0.597358	0.0489593	1.01619	0.138899	0.879728	0.601558	0.882428	0.800284	1.48066	0.449752	0.897326	0.435424	0.792431	0.696277	0.66594	0.489608	0.664822
Macma4_01_g07480	111.609	78.2669	46.4458	102.144	56.032	97.0505	76.0902	96.8238	131.535	112.47	48.1893	77.9881	111.799	107.605	130.847	142.47	77.4558	103.668
Macma4_01_g07490	6.32164	5.64388	7.80617	4.71651	7.31431	7.51804	9.03754	4.61602	5.24685	7.0319	7.61324	5.84732	6.51429	5.86492	6.18754	6.78133	11.5716	5.70824
Macma4_01_g07500	13.4206	14.0991	13.8126	10.1056	11.4399	10.2755	13.8366	9.49434	9.64715	13.0213	16.6891	11.2873	10.074	10.8222	10.8559	10.8144	12.3592	10.237
Macma4_01_g07510	2.28353	2.68144	3.96239	1.52421	1.174	1.43137	1.23978	3.06511	1.09647	0.638989	1.84341	1.39517	0.998214	0.754974	0.327211	1.40502	1.32813	1.36963
Macma4_01_g07520	17.982	11.2161	3.91976	14.8375	4.74655	13.8333	7.08721	15.7667	16.1048	9.59395	2.59081	15.186	13.1791	10.5665	11.8368	13.5819	10.5623	11.863
Macma4_01_g07530	5.18363	3.78205	2.85531	1.17313	1.72029	2.41721	2.65952	3.25796	3.15752	2.06808	2.03068	1.70823	1.14683	1.21394	1.29064	3.43369	5.94327	2.4152
Macma4_01_g07540	6.84106	5.55595	4.50706	3.15212	2.16292	2.5023	3.28778	2.4249	2.56569	1.93167	3.62534	1.95701	0.817635	2.96567	1.20054	5.82887	14.4367	1.42794
Macma4_01_g07550	35.1914	17.1746	16.8656	26.3871	6.80508	23.1009	13.9302	23.8878	32.0099	35.0861	16.9392	17.7862	15.8996	17.1066	18.624	32.4565	26.5574	27.1927
Macma4_01_g07560	35.989	30.6594	32.0041	35.9694	47.0849	38.6881	38.879	33.4025	35.8256	46.2259	36.9822	39.2794	44.9453	43.2078	47.9119	37.0656	35.2667	36.4713
Macma4_01_g07570	24.5997	20.6897	20.1601	16.6931	6.24029	15.0583	10.3666	14.1088	13.3213	20.3211	24.4922	21.7944	11.8956	13.373	11.5005	15.6193	29.3441	15.025
Macma4_01_g07580	4.43265	11.5949	16.7686	4.83202	3.45525	2.71567	3.8881	3.02232	2.67579	4.53662	7.73647	3.98371	3.71642	4.42974	3.35237	4.31826	12.4091	4.57561
Macma4_01_g07590	25.2929	22.0068	18.0035	23.2786	21.7916	27.145	24.4609	19.9527	24.6949	28.7749	23.7554	31.2374	36.6613	32.3552	35.1499	23.5568	21.6644	25.6687
Macma4_01_g07600	9.64275	9.56744	16.3869	9.74149	14.4913	12.8851	14.3119	9.90766	7.92329	12.5868	17.1378	14.7611	11.8638	12.2668	12.6267	10.0389	11.1598	11.1991
Macma4_01_g07610	6.35081	3.02979	3.73407	4.22749	4.30582	3.80476	2.52588	6.10059	2.71275	5.07793	6.37355	2.8805	2.6996	4.96872	2.47887	4.19917	5.55252	8.07674
Macma4_01_g07620	22.2852	21.3067	16.2903	18.3935	42.6897	21.7169	22.1862	17.5106	20.6156	24.942	20.7342	24.0386	30.9542	26.2609	30.047	20.5661	18.6306	15.562
Macma4_01_g07630	27.9519	23.7737	22.9356	27.613	28.9616	24.8862	30.6872	27.8627	22.0603	23.5309	30.9928	24.3831	23.1667	24.7319	24.5292	21.1786	23.2125	21.4789
Macma4_01_g07640	11.0208	31.8052	72.9148	17.8039	17.9219	17.2391	46.0118	27.6806	7.43818	15.6386	39.9454	17.0307	9.21292	11.512	7.28883	24.9604	48.5272	22.6735
Macma4_01_g07650	8.84207	11.7503	15.9341	9.38149	8.49728	6.17493	8.48874	5.23638	6.52775	4.00753	11.4458	16.2332	6.09999	6.45446	7.79245	7.84613	5.19172	6.36713
Macma4_01_g07660	0	0	0	0	0	0	0	0	0	0	0	0	0	0	0	0	0	0
Macma4_01_g07670	8.27414	9.71019	9.3631	7.85752	1.27191	7.87638	6.94923	8.43789	9.0664	2.65483	9.45654	4.92112	2.80639	3.63616	3.46202	11.5186	11.6765	8.52621
Macma4_01_g07680	10.2311	6.56076	7.1597	7.59735	12.6388	10.0473	5.49895	7.22926	7.71823	9.73641	9.30692	5.46931	7.49043	9.19948	7.74131	8.17559	6.15907	7.69991
Macma4_01_g07690	3.36736	4.0494	4.4789	1.27931	0.427445	2.52591	1.51464	0.703579	1.97769	2.10883	2.18933	0.609663	1.27906	2.20425	1.2375	2.11145	1.3306	1.15443
Macma4_01_g07700	36.9742	30.5731	36.2299	31.136	21.9923	33.9802	32.2682	30.7429	38.9761	31.7729	38.3476	35.4071	29.1229	26.8464	32.8298	35.0175	37.6815	33.5486
Macma4_01_g07710	0	0	0	0	0	0.0790838	0	0	0	0	0	0	0	0	0	0	0	0
Macma4_01_g07720	0	0.46052	0.981345	3.54909	0	0.618715	1.0718	1.91614	0	0	0	0	0	0.453817	0	0	0.623096	0
Macma4_01_g07730	24.7075	14.3108	8.92444	19.8435	10.9843	15.9893	15.4287	13.054	17.4304	16.4809	9.84609	6.96697	13.8799	15.1394	17.4078	22.7281	14.6503	18.7312
Macma4_01_g07740	9.78784	6.64428	8.26112	6.9929	10.0855	9.65731	9.75093	7.61024	6.76219	9.40052	9.07502	7.40026	8.2604	8.55854	7.818	6.98826	6.5184	7.80628
Macma4_01_g07750	2.52439	4.77529	2.30109	4.00421	0.435217	1.6684	0.481692	0.875564	0.766198	0.234314	0.493228	0.892578	1.29611	1.34789	0.941111	0.953144	0.998385	0.57465
Macma4_01_g07760	1.76718	2.95854	1.91005	2.20528	1.01051	1.71794	1.11599	1.19167	0.800551	1.81167	0.858904	0.442984	1.6512	2.22367	1.01683	1.35924	1.10676	1.56358
Macma4_01_g07770	44.2638	15.9802	19.3852	28.7083	35.4826	32.9135	26.1664	23.9593	35.08	47.4703	14.5935	18.3093	27.1735	29.1403	35.1389	38.6697	28.3561	34.9915
Macma4_01_g07780	18.5019	23.6909	23.4998	22.8781	35.5381	21.1896	25.2897	21.2873	19.0224	27.8674	24.0627	29.7392	32.1605	29.9602	31.641	18.3703	15.1075	19.522
Macma4_01_g07790	0	0.104909	0.111778	0.0527284	0	0	0.0915605	0.0503664	0	0	0	0	0.0994109	0	0	0	0	0.209358
Macma4_01_g07800	1.62102	3.28066	2.91288	6.74547	1.20203	4.30743	2.77646	4.77281	1.20237	0.82512	3.98944	1.98758	1.46016	3.5268	0.886111	1.70756	3.27867	5.00938
Macma4_01_g07810	9.8836	8.73211	16.3745	8.30888	10.4234	11.2334	16.8801	8.58952	8.86752	12.1204	13.3976	11.6523	12.039	11.3294	11.725	10.9063	11.4612	9.48108
Macma4_01_g07820	0	0	0	0	0	0	0	0	0	0	0	0	0	0	0	0	0	0
Macma4_01_g07830	0.445889	0.361523	0.584432	0.17544	0.050244	0.25123	0.304643	0.418951	0.385983	0.243455	0.305042	0.104333	0.389828	0.479109	0.344462	0.441633	0.341562	0.34829
Macma4_01_g07840	0.884385	5.91979	6.86722	1.61972	0.776478	2.22364	0.183428	1.00902	0.474491	1.71018	2.74278	0.423451	0.398311	0.448741	0.780551	0.451244	0.888643	0.594175
Macma4_01_g07850	17.0861	6.75811	7.82287	10.9589	7.6221	11.8259	11.1896	10.8418	13.2393	17.1085	9.36395	7.49992	9.8826	11.0173	14.9974	13.4351	8.57946	11.2665
Macma4_01_g07860	15.6307	17.9781	19.6538	13.4069	6.93543	16.8775	14.4312	14.9033	15.8479	12.7567	22.4059	11.387	14.7447	13.1047	14.3039	13.7527	12.4856	16.1097
Macma4_01_g07870	19.9182	18.5084	16.2295	18.9472	27.6948	22.6369	15.7821	22.3064	18.4433	23.0581	20.2394	14.6789	22.7394	26.8763	24.0821	22.0159	15.7162	17.2366
Macma4_01_g07880	3.41787	3.19025	3.73279	3.18724	2.50454	2.70185	4.18503	3.34515	1.7801	3.15335	4.69337	3.13044	2.93032	3.85744	4.76257	3.88704	2.44292	3.18325
Macma4_01_g07890	6.57783	1.71779	1.48251	3.79888	3.98094	4.74269	5.33723	2.19371	4.47098	9.37635	1.54682	1.24596	4.41124	6.56802	6.06328	6.49118	3.4166	5.22777
Macma4_01_g07900	2.38494	0.887121	2.84612	1.14937	1.92676	1.6686	2.34854	1.28717	1.19215	1.40522	1.59186	1.04492	1.45709	1.50558	1.18608	1.93643	1.79044	1.27858
Macma4_01_g07910	0.415951	0.395396	0.263303	0.0496826	0.1494	0.229088	0.198424	0.227793	0.172157	0.279912	0.164476	0.101112	0.0562011	0.126633	0.0352431	0.137951	0.67207	0.236717
Macma4_01_g07920	0.610588	0.107984	0.373926	1.42469	0.204008	0.394431	0.282732	0.570269	0.430986	1.04123	0.620939	0.0502075	0.230231	0.585267	0.0721875	0.362259	0.246552	0.633013
Macma4_01_g07930	0	0	0	0	0	0	0	0	0	0	0	0	0	0	0	0	0	0
Macma4_01_g07940	2.73747	4.33104	4.84249	3.33242	2.44237	3.71757	4.74439	3.79924	2.20737	3.21965	5.2509	2.10489	2.75292	3.93428	2.62127	2.7361	2.35124	4.17926
Macma4_01_g07950	4.40191	6.51278	12.8357	3.76525	2.27809	5.88246	4.68276	3.62898	0.587708	7.9081	21.5677	6.05628	1.72673	2.29451	2.70703	1.34036	6.2323	2.69367
Macma4_01_g07960	43.7651	80.7802	56.9729	65.9025	60.7485	51.0978	37.7048	64.5831	41.1326	33.8166	70.4305	80.9421	55.8066	60.5245	52.5986	47.2274	52.1089	50.6162
Macma4_01_g07970	15.0691	6.51544	9.60554	9.9957	13.3138	10.7314	14.2056	9.09834	9.57517	16.8466	9.46859	7.60849	11.0695	12.4111	14.0128	12.6343	9.64772	11.6403
Macma4_01_g07980	128.339	195.403	154.763	180.742	159.396	128.488	133.956	168.623	125.811	151.62	271.218	146.139	148.645	174.112	130.653	101.814	91.5812	121.095
Macma4_01_g07990	27.2046	79.0652	86.2653	32.6936	52.0785	29.1887	49.0568	49.0647	20.1107	25.6558	88.978	45.7835	26.0099	30.5193	20.9267	20.4968	41.3077	28.215
Macma4_01_g08000	4.78157	15.8614	17.3675	3.43463	4.39029	4.13777	6.0188	5.50808	3.27564	4.31581	12.0577	4.92627	4.48528	3.70685	3.10139	2.05273	5.5985	4.72296
Macma4_01_g08010	5.27557	11.3817	12.3949	8.16997	6.98543	5.27491	2.7715	6.44545	1.26248	3.59199	16.6793	6.40297	5.28832	6.27415	3.99351	1.75514	3.42984	3.40387
Macma4_01_g08020	0.392962	0.684829	0	0.187747	0	0.564592	0.108671	1.73358	0	0.547121	0.365613	0	0	1.28837	0	0	1.074	0.807567
Macma4_01_g08030	14.4904	13.7371	18.531	13.1637	13.7665	16.6535	18.0528	11.297	12.1037	13.4318	18.1245	16.277	15.7493	17.6982	14.6816	13.5988	15.5067	12.3056
Macma4_01_g08040	0	0	0	0	0	0	0	0	0	0	0	0	0	0	0	0	0	0
Macma4_01_g08050	44.1408	59.6226	24.2984	55.256	96.2141	39.171	46.7855	58.3353	65.4999	38.1848	44.5415	77.2001	68.7768	59.2615	62.0354	63.2332	49.1539	60.8001
Macma4_01_g08060	0	0.106878	0	0	0	0	0	0	0	0	0	0	0	0	0	0	0	0
Macma4_01_g08070	0	0	0	0	0	0	0	0	0	0	0	0	0	0	0	0	0	0
Macma4_01_g08080	9.70411	12.2245	13.042	9.12758	6.04555	9.11716	9.25495	9.31946	7.48177	9.22665	9.10725	7.95141	9.10596	7.44613	8.23648	9.85108	8.00959	10.4369
Macma4_01_g08090	15.5951	21.6493	29.3409	16.8004	21.318	19.3677	22.053	17.8157	15.5261	20.8141	34.9693	20.6189	19.9432	19.9735	18.1651	18.1464	16.6057	17.8167
Macma4_01_g08100	13.3074	22.7579	18.3506	19.1478	17.0967	20.2221	20.4446	23.9909	13.3315	10.8475	18.5191	13.1411	18.8218	17.833	15.6663	14.4858	12.02	15.6478
Macma4_01_g08110	10.7791	9.95837	6.6863	9.45193	10.4072	11.1539	7.23674	9.40388	9.31684	10.0855	9.72683	10.4275	9.59244	7.8264	9.57315	8.01788	8.24721	8.99213
Macma4_01_g08120	13.5046	17.7192	19.1624	14.0104	13.7376	13.1647	13.6764	17.0746	12.8737	11.7817	18.7419	17.4534	14.7172	11.7281	12.998	14.0255	13.8996	15.3709
Macma4_01_g08130	6.0815	11.2206	11.4325	6.26146	0.838267	8.46897	4.85922	4.97732	4.29314	7.37371	9.22859	4.06654	4.10344	4.2043	3.15632	4.48846	4.784	5.38515
Macma4_01_g08140	0	0	0	0	0	0	0	0	0	0	0	0	0	0	0	0	0	0
Macma4_01_g08150	0.310786	0	0	0	0.992241	0	0	0.283667	0.476409	0.288471	0.86747	0	0.093315	0.38817	0.438876	0.317148	0.199861	0
Macma4_01_g08160	0.399045	1.433	0.381708	2.28783	2.25077	3.7585	0.846041	1.5176	1.24379	0.411547	1.81511	0.195965	1.37787	2.05592	1.07067	2.26229	0.66293	0.693902
Macma4_01_g08170	0.3365	3.03877	0.852036	5.65912	1.03136	2.61074	2.06586	1.53569	1.54748	0.0312339	2.12895	2.1119	2.00051	2.96302	1.19747	1.64826	2.7266	5.13862
Macma4_01_g08180	7.93226	13.3304	7.91494	10.8174	16.9022	11.2373	17.4189	14.3014	10.5742	9.9442	26.514	16.5339	14.4313	9.92569	13.0601	10.1333	8.86077	16.998
Macma4_01_g08190	0	0.318894	0.339773	0.38467	0.128526	0.128531	0.222654	0.612398	0.67881	0	0.312124	0.593083	0.241745	0.188551	0.0568483	0.0684677	0.517766	0.127277
Macma4_01_g08200	1.55266	1.82887	2.70071	1.03209	0.355621	0.581947	1.06411	0.739395	0.931341	1.03389	0.43966	0.92493	0.608077	0.822078	0.25739	0.792219	0.553508	0.6403
Macma4_01_g08210	5.56475	5.99506	5.11007	4.96288	2.06091	4.76159	4.92447	5.82412	4.36751	2.82364	8.69814	7.47685	5.7477	4.51773	4.33775	5.07293	3.93645	4.36327
Macma4_01_g08220	17.3364	20.4893	24.0951	14.3489	3.11088	15.7974	20.5069	14.8996	14.6261	16.9138	19.3872	16.294	14.6661	14.8173	20.2285	15.9264	14.77	16.4435
Macma4_01_g08230	46.8625	54.3659	30.9825	62.4242	30.4454	48.8979	40.4006	58.0261	63.8273	41.5727	38.8142	44.7382	59.0609	46.5508	43.8625	57.4268	54.5148	56.6298
Macma4_01_g08240	3.67834	3.49656	1.71946	3.82381	1.20018	2.40046	3.62175	2.36122	2.67678	3.63934	2.70778	2.46541	2.29383	3.10489	2.39739	3.17615	2.41746	2.76044
Macma4_01_g08250	14.0676	11.745	13.4677	13.3741	7.58426	10.9053	8.77095	9.92307	9.76307	6.6612	8.76111	6.25539	6.3358	10.037	7.36194	12.4774	12.4552	9.54044
Macma4_01_g08260	9.52568	16.0261	24.6926	10.984	21.6955	12.2821	17.5946	9.97953	7.96625	8.25448	15.6694	15.3518	10.7556	10.9849	10.7286	9.3933	20.6982	8.5195
Macma4_01_g08270	11.2976	13.5382	18.2496	10.9279	18.7603	14.1423	20.6132	10.8084	8.59536	13.2392	16.8439	11.2502	10.5897	13.4411	8.80401	11.5615	18.5851	10.5538
Macma4_01_g08280	0	0.304666	0.231868	0.0875021	0	0	0	0	0.021056	0	0	0	0	0	0	0.0467236	0.397499	0.0868565
Macma4_01_g08290	2.5341	2.68966	4.44037	2.06492	2.11447	3.52921	2.07657	2.79544	3.04569	3.03038	3.31241	5.02976	2.39466	3.04372	3.21409	2.28454	2.17451	2.63952
Macma4_01_g08300	95.0479	79.3468	76.9166	108.04	86.0097	110.788	88.2533	104.071	107.804	90.561	97.2877	121.254	109.002	97.4294	84.8606	89.8876	95.7854	132.454
Macma4_01_g08310	0	0	0	0	0	0	0	0	0	0	0	0	0	0	0	0	0	0
Macma4_01_g08320	0.29283	0	0	0.139906	0	0.140242	0	0	0	0	0	0	0	0	0	0	0	0.694369
Macma4_01_g08330	0.174766	0.498388	0.619523	0	0	0	0.289982	0.0797579	0.0803704	0	0.650411	0	0.157423	0	0.222115	0.178343	0	0.165765
Macma4_01_g08340	0.0980457	0	0.198606	0	0.187817	0	0	0	0.36071	0	0	0.173336	0.44158	0	0.166146	0	0.189154	0.185992
Macma4_01_g08350	0	0	0	0	0	0	0	0	0	0	0	0	0	0	0	0	0	0
Macma4_01_g08360	1.44403	2.20242	2.39028	3.10979	0.939269	2.14698	1.32318	2.24261	1.72461	0.96025	2.10554	0.990683	1.12601	2.00885	0.693932	1.82549	2.1206	2.61666
Macma4_01_g08370	19.4429	23.7143	29.8988	18.7879	14.0324	19.0691	21.8556	17.4963	17.5803	14.2087	28.3575	20.6239	17.2668	15.4169	13.295	14.196	16.8531	17.0908
Macma4_01_g08380	0	0	0.30471	0	0	0.288168	0.187197	0.1373	0.0691772	0.279251	0.0699785	0.199455	0.270997	0.211367	0	0.383763	0.435313	0.142679
Macma4_01_g08390	42.9845	24.9085	7.87125	33.779	20.8159	31.2909	35.2048	62.8995	92.9863	25.5348	12.7338	58.9703	42.7457	33.8231	44.1705	81.3421	40.2697	53.5563
Macma4_01_g08400	1.39773	3.82244	4.83498	1.21231	0.762056	0.494325	0.428159	1.25613	1.246	0.558866	3.22111	0.627266	1.31713	0.745302	0.747006	0.680253	1.78388	1.18297
Macma4_01_g08410	0.102521	0.0649696	0.207671	0.0326544	0	0.0981985	0.340218	0	0	0.729558	0.0953857	0.120831	0.246259	0.224084	0.231639	0	0.0659292	0.0324135
Macma4_01_g08420	40.5853	28.796	9.96521	53.1624	46.3171	43.1884	32.0359	36.6302	50.8741	26.9836	21.458	83.8531	68.5017	66.3564	65.1214	45.5008	40.3548	42.2396
Macma4_01_g08430	10.9508	9.46855	13.8026	7.87696	5.86362	10.8375	10.1244	9.16538	6.91289	13.4839	13.8637	7.42074	7.61646	8.74401	8.93611	7.37094	7.49377	9.71606
Macma4_01_g08440	26.0296	18.2742	12.4243	20.1713	3.63278	15.9433	12.6585	18.7138	28.5454	17.9847	11.6755	14.656	20.0105	16.4043	18.5839	23.3997	12.962	26.9708
Macma4_01_g08450	39.9692	28.446	34.947	29.0421	34.7933	30.5575	35.2753	29.0237	29.103	50.0938	41.5454	33.9048	33.4713	32.6146	34.3505	32.9804	28.1633	33.1718
Macma4_01_g08460	0.483339	1.24536	2.56362	2.84404	0.146193	1.97368	1.15022	1.31188	0.865704	0.625727	0.579876	0.719577	0.458288	2.14468	1.3148	0.63601	2.28212	2.83512
Macma4_01_g08470	9.46245	6.29401	8.20199	6.78135	15.417	7.31315	9.02373	7.20873	7.94329	13.2907	9.0368	6.8486	10.4513	8.59424	9.52334	8.03401	6.07305	8.27466
Macma4_01_g08480	59.6434	126.819	225.622	61.4769	71.1645	69.2162	98.2293	92.3077	19.7518	61.8546	195.192	61.9591	49.3772	61.2628	40.5557	52.5954	68.2114	62.3672
Macma4_01_g08490	64.9689	55.7891	50.3421	53.311	49.4118	50.7092	58.0679	58.8589	62.1987	72.5891	63.9528	65.6276	61.3933	59.5924	72.5234	69.9464	39.5127	51.7723
Macma4_01_g08500	10.9452	5.74029	8.99946	6.94493	15.3996	10.0396	9.42041	6.25981	6.49632	13.8126	9.7821	6.6343	7.52782	9.80838	11.2564	7.73591	6.31397	8.57109
Macma4_01_g08510	0.281567	0.802958	0.760473	0.5381	0.898953	0.269696	0.934387	0.685327	0.863237	0.174233	0	0.663712	0.169084	0.0879189	1.82902	0.383107	0.814817	0.979239
Macma4_01_g08520	124.482	82.3936	54.5985	106.589	156.394	97.033	99.2767	85.4522	111.737	176.095	75.4352	80.4551	126.086	130.594	181.634	121.404	77.0373	105.226
Macma4_01_g08530	3.56817	3.70736	5.0847	2.14088	2.90099	3.89463	3.37332	2.99172	1.98436	3.11942	5.09556	3.88761	1.9434	3.96432	2.03895	2.92143	4.24239	3.38439
Macma4_01_g08540	0	0	0	0	0	0.500864	0	0	0	0	0.29191	0	0	0	0	0	0	0
Macma4_01_g08550	0	0.113461	0	0	0	0	0	0.217889	0	0	0	0.316526	0	0	0	0	0	0
Macma4_01_g08560	3.31987	4.02973	2.17265	3.87995	2.69059	4.20726	5.33904	3.30989	3.57019	3.74521	2.8037	5.03399	4.71566	4.64089	4.78191	5.29022	2.98072	3.34266
Macma4_01_g08570	66.0562	39.0144	37.1048	52.1948	74.7067	52.1938	65.3814	43.2893	54.3453	82.3979	47.7196	38.5774	60.6038	59.0548	81.8863	57.6632	44.3691	56.4011
Macma4_01_g08580	20.6417	3.29009	2.78752	31.3195	18.6923	27.0809	8.02626	13.1693	17.3743	19.237	0.116395	7.85144	21.9363	17.461	21.5174	14.1705	8.52773	11.9845
Macma4_01_g08590	53.2176	39.6489	32.1341	47.2963	62.2546	50.6088	53.2461	47.0994	55.3573	59.5723	42.3367	53.5237	57.1575	60.4269	60.4233	51.3063	40.5146	49.4953
Macma4_01_g08600	47.8654	40.5405	47.5216	46.1835	64.1151	50.9708	64.4106	47.3148	43.3088	59.0789	56.614	51.6508	58.8956	61.4949	57.4675	48.5032	43.5517	49.0548
Macma4_01_g08610	28.8	14.8752	21.6943	18.5939	23.1202	24.9813	22.2514	17.4571	18.4248	37.2052	25.5565	21.8444	27.0083	24.9683	29.7775	21.4806	15.4518	22.7902
Macma4_01_g08620	97.7425	69.3504	52.917	75.7744	77.95	70.4441	91.7293	75.1511	73.0609	118.484	58.0127	80.8721	99.635	93.8096	141.981	97.5698	68.4077	77.2355
Macma4_01_g08630	27.6129	29.6214	27.6374	27.7476	36.7181	29.432	30.1462	28.9655	31.3258	35.8565	31.8905	38.0784	32.368	31.774	39.7025	29.0004	27.5328	31.6288
Macma4_01_g08640	2.23414	1.69898	3.33246	1.74667	0	1.59523	1.34801	1.33474	1.98012	1.28194	2.04085	0.394974	0.768382	0.532717	0.309757	1.69954	1.25387	1.54114
Macma4_01_g08650	1.05763	0.211003	0.34384	0.548977	0.650325	1.06307	0.173323	0.238357	0.588459	1.68464	0.0850393	0.634808	0.39989	0.47702	0.862931	0.306463	0.428239	0.507773
Macma4_01_g08660	18.7515	15.1063	11.4225	13.6125	9.35485	14.1103	13.5647	12.9042	13.2018	15.8775	9.91563	17.124	17.0851	17.5149	13.0533	15.2257	12.2323	14.8428
Macma4_01_g08670	0	0	0	0	0	0	0	0	0	0	0	0	0	0	0	0	0	0
Macma4_01_g08680	10.1177	7.48901	7.26887	8.76561	14.4458	11.5777	12.6469	7.70803	9.62838	19.0831	10.7942	9.87374	15.311	12.1315	14.7449	11.5087	6.87089	8.62417
Macma4_01_g08690	13.4477	7.79429	8.99667	11.6275	11.6689	11.7111	10.1194	10.3502	10.4832	14.3039	9.76599	7.63349	10.0704	9.1244	11.0369	10.6817	10.5038	11.1831
Macma4_01_g08700	125.903	129.373	151.691	121.893	77.6809	122.408	120.441	131.908	112.958	117.58	138.557	110.405	92.884	111.174	105.138	132.421	126.59	119.712
Macma4_01_g08710	25.602	26.2721	23.0873	23.1081	32.4396	19.7363	20.0631	22.3826	21.1643	24.909	22.6149	22.4129	22.6446	20.313	21.8491	25.591	18.9239	20.6555
Macma4_01_g08720	0	0.264935	5.5045	0.932115	0	0.0800874	0	0.0254389	0	0	0	0	0.025105	0.156647	0	0.170648	0.752775	0
Macma4_01_g08730	8.50417	4.7287	5.3728	7.84999	12.0005	7.75021	7.53481	6.5375	6.43582	12.3576	6.2031	2.97407	6.19141	8.12093	9.44408	5.9189	5.15694	8.30111
Macma4_01_g08740	22.8529	16.7152	25.5467	18.2387	30.609	27.3644	26.2268	17.879	16.3266	26.6026	26.1044	18.9818	22.9532	23.6834	19.5456	18.9721	17.9079	21.5533
Macma4_01_g08750	0.363012	0.517609	0.0459583	0	0	0.260781	0.225874	0	0.33388	0.252711	0.422185	0.160443	0	0	0	0.185221	0.656568	0.0430394
Macma4_01_g08760	0.178901	0	0	0.0976846	0.122394	0.0979191	0	0.0116636	0.0117532	0.142333	0.0118893	0	0.172658	0.035911	0.389779	0.0130402	0.0616328	0.121205
Macma4_01_g08770	2.95398	16.4818	9.43086	1.71814	1.7222	1.16868	1.17208	2.75483	0	1.84779	6.87099	0.454119	1.15689	1.08279	0.217641	0.589783	0.619452	1.46183
Macma4_01_g08780	6.30593	14.4045	23.5201	6.42023	5.00531	6.51172	4.62542	5.72669	2.95107	6.87046	23.2318	7.46964	4.60708	4.70184	3.3242	3.29045	4.19823	6.62898
Macma4_01_g08790	0	0.592576	0.679942	0.137462	0.229645	0.229654	0	0	0.0882085	0.267057	0.133845	0.890142	0.129582	0	0	0.048934	0	0.272896
Macma4_01_g08800	0.0305881	0	0	0.204598	0.380866	0.146492	0.304522	0.167514	0.281334	0.113567	0	0.0270384	0.688815	0.830944	1.01076	0.280927	0.0295059	0.464202
Macma4_01_g08810	12.7469	10.0083	9.92589	11.0413	11.7017	10.6556	13.6517	9.36815	11.4499	13.3683	9.45702	11.5896	14.1064	13.6774	14.896	12.5348	10.1881	8.76161
Macma4_01_g08820	0	0.564241	0.601184	0	0	0.568549	0	0	0	0	0.138066	0	0.53467	0.834042	1.13159	0.151431	0	0.140751
Macma4_01_g08830	47.7633	51.9887	57.5613	42.2056	38.3649	45.5738	52.7837	48.244	48.0236	43.7518	56.0078	59.5115	50.5315	51.4755	49.281	50.5357	45.5129	48.6832
Macma4_01_g08840	33.3407	51.0716	63.9745	31.8396	50.2226	38.3107	36.0509	38.9914	30.0072	33.8977	73.6132	56.6424	34.6497	35.401	38.6028	32.7255	31.4904	37.7673
Macma4_01_g08850	80.9592	17.5922	18.8085	51.4722	21.7462	52.0222	35.72	25.9473	47.2042	65.5242	20.1773	6.91468	28.643	32.3489	33.1933	75.4775	33.741	46.9906
Macma4_01_g08860	43.2519	37.2638	52.8903	36.0174	44.8288	45.8974	57.0939	35.3871	38.7516	49.3344	50.6101	33.1796	43.1908	42.1255	42.1537	39.1241	38.8126	53.2887
Macma4_01_g08870	0.975988	0.856391	2.87426	0.860862	1.51007	1.4526	0.996565	0.973054	0.676701	0.613232	0.544837	0.836182	0.703307	0.689206	0.559777	1.04193	0.637296	0.356046
Macma4_01_g08880	31.1109	31.2005	41.1769	26.8417	28.1395	33.6182	43.9364	26.8523	29.7625	38.9888	40.0931	29.8858	34.2087	31.7272	33.7646	37.2959	37.644	29.6805
Macma4_01_g08890	14.0818	2.6935	3.71052	7.93125	7.23724	9.84192	6.19752	4.65007	10.2139	18.0386	2.68958	4.78171	9.56483	10.4563	14.1381	11.4785	7.1231	11.1033
Macma4_01_g08900	21.9812	23.8026	29.8829	19.3521	9.71709	23.129	23.9893	22.1614	21.4404	26.3634	33.1429	25.6105	24.2151	21.0179	17.9001	23.3424	19.4809	22.4168
Macma4_01_g08910	4.68466	3.31782	4.97961	2.80329	7.43017	4.70929	6.02221	3.66201	3.26353	7.32967	5.11383	3.95652	4.55401	4.19281	6.5532	3.89307	2.55028	3.51951
Macma4_01_g08920	6.48388	7.43973	7.32985	9.41863	3.16787	5.52046	4.78153	8.69781	8.22246	3.92103	6.03262	4.94988	4.42458	5.27618	4.07867	7.81961	8.33932	7.05068
Macma4_01_g08930	17.0881	6.81361	5.3722	12.3285	11.3416	12.7151	13.1778	11.5931	11.814	24.5369	7.54928	9.70679	12.3965	11.8443	14.8429	14.6584	9.18212	14.0324
Macma4_01_g08940	8.60202	7.16431	5.36765	8.11783	4.61693	8.59648	8.21913	7.24372	8.10766	8.94845	7.68123	3.90783	7.22063	6.91034	7.2207	9.37598	8.11787	8.51262
Macma4_01_g08950	1.63459	2.15144	0.764101	1.44178	1.20432	1.3248	1.98201	2.18056	2.31295	3.15117	3.27564	2.00064	1.47238	1.76677	2.13073	1.15481	1.94063	1.19262
Macma4_01_g08960	4.67682	1.75874	2.21224	4.34615	1.52598	4.18429	3.77344	2.25164	4.7033	5.62902	0.884612	1.36289	3.51831	3.61071	4.07148	3.38274	2.67707	2.87605
Macma4_01_g08970	17.8695	13.0343	11.3259	17.8677	20.0972	19.4506	18.4782	15.1979	16.9535	21.8523	15.9017	19.3985	20.7913	21.3628	23.0363	17.9009	14.4319	17.4736
Macma4_01_g08980	1.56139	1.86903	1.83521	1.06833	1.55089	0.941648	1.75915	1.79462	1.11696	1.82502	1.82935	0.57934	2.44825	1.67931	2.27024	1.43598	0.539238	1.99291
Macma4_01_g08990	44.912	56.4352	57.0298	48.2185	39.4605	47.2938	53.8423	56.7304	43.9417	42.8972	57.4423	48.726	47.4644	49.0274	40.0113	56.5333	58.1832	51.7405
Macma4_01_g09000	0.527477	0.136748	0.339971	0.274925	0.045929	1.01048	0.318263	0.48145	0.441043	0.890189	0.669227	0.466265	0.604714	0.359354	0.446925	0.24467	0.46256	0.50031
Macma4_01_g09010	0	0	0	0	0	0	0	0	0	0	0	0	0	0	0	0	0	0
Macma4_01_g09020	0.906698	0.933715	2.67844	1.58838	0.627205	1.35095	0.250741	0.804591	0.76444	0.607819	0.726428	0	0.521793	0.990903	0.362777	0.873853	1.19046	1.36166
Macma4_01_g09030	13.327	11.6695	11.8691	12.2021	13.3289	12.9939	13.0115	8.87965	9.94367	17.7349	12.9476	13.582	12.1909	13.021	15.7168	10.3014	9.72228	11.0096
Macma4_01_g09040	107.483	122.628	50.3561	136.324	225.344	97.6806	126.641	132.954	147.03	130.52	105.511	153.016	161.909	179.718	180.885	146.245	107.854	117.715
Macma4_01_g09050	38.5422	41.3559	39.8294	38.4099	60.8709	40.1576	55.1886	46.1953	53.9279	42.9189	41.4814	60.1342	53.5333	44.0198	49.7293	53.8033	45.914	43.6892
Macma4_01_g09060	0	0	0	0	0	0	0	0	0	0	0	0	0	0	0	0	0	0
Macma4_01_g09070	0.314495	0.44843	1.513	0.0751286	0	0.451854	0.391372	1.07645	0.289257	0.656806	0.292607	0.138999	0.49575	0.368252	0.532936	0.0802331	0.227527	0.52202
Macma4_01_g09080	0.565204	0.729157	1.06312	0.540079	0	0.618715	0.267949	0.626432	0.482715	0.562095	0.826364	0.142747	0.690943	0.378181	0.205239	0.370783	0.311548	0.382924
Macma4_01_g09090	18.2121	6.13419	6.20574	9.54207	8.09122	11.6003	12.7623	7.75814	11.7146	21.9745	9.70339	5.99232	13.4925	12.8347	18.4684	11.2414	7.00446	13.5027
Macma4_01_g09100	4.3893	1.23377	3.22663	2.18729	1.24314	3.2775	5.149	1.68006	2.30069	5.78265	2.30538	1.54363	3.35854	3.47059	4.79871	3.29915	2.73162	2.82025
Macma4_01_g09110	10.1203	10.3187	18.8839	9.52993	8.58715	7.1998	8.4135	6.61167	6.39208	5.59329	15.1788	18.1701	9.04031	6.27418	7.89876	5.44225	6.58241	7.64736
Macma4_01_g09120	28.2908	38.9794	51.1315	26.4809	26.9587	27.4579	31.4304	25.6903	24.0802	31.9191	45.9759	33.3352	30.0646	28.6128	27.8146	28.575	33.8685	26.5596
Macma4_01_g09130	1.08265	1.39669	0.391617	2.21682	0.222206	1.25921	1.9247	3.45861	0.853511	0.646014	0.0719498	0.478504	0.90555	1.15904	1.83462	1.57829	3.58061	2.20047
Macma4_01_g09140	7.78937	10.2579	10.814	4.57478	7.89741	5.60483	9.29941	17.5141	8.2826	5.67826	7.53008	7.92665	2.84078	6.33564	2.22141	5.54478	18.9128	5.65827
Macma4_01_g09150	1.79808	2.56383	2.31977	5.66579	2.5423	2.21435	3.97797	4.51324	1.71284	1.37094	4.16243	1.2299	1.06048	2.14553	1.19703	1.96594	2.12678	1.23849
Macma4_01_g09160	0	0.782884	0	0.349765	0	0.438256	0	0	0	0	0	0	0	0.257163	0	0	1.32408	0
Macma4_01_g09170	83.2472	82.0994	68.9725	97.5447	105.781	82.3821	103.393	92.5882	96.9345	92.3834	84.9841	91.2394	102.531	108.788	105.593	87.8073	80.9405	84.6098
Macma4_01_g09180	0	0.169731	0.180844	0	0	0	0.370336	0	0	0.331469	0	0	0	0	0	0	0	0.169358
Macma4_01_g09190	0	0	0	0	0	0	0	0	0	0	0	0	0	0	0	0	0	0
Macma4_01_g09200	0	0.470908	0.334494	0.315578	0	0	0	0	0	0	0	0	0	0	0	0	0	0.391562
Macma4_01_g09210	0	0	0	0	0	0.169648	0	0	0	0	0	0	0	0	0	0	0	0
Macma4_01_g09220	0	0	0	0	0	0	0	0	0	0	0	0	0	0	0	0	0	0
Macma4_01_g09230	91.4095	97.647	90.4582	97.2347	59.7599	91.1573	92.8695	97.3437	79.5136	89.3248	98.1438	95.656	92.0199	90.6148	94.677	92.4995	80.3755	87.6483
Macma4_01_g09240	1.25016	27.7502	0.136885	57.34	29.2232	49.4838	31.2833	83.3906	20.9456	3.3871	3.48945	9.16918	13.4827	17.4079	12.8827	10.5163	33.6682	28.3303
Macma4_01_g09250	0.631099	1.51977	5.0283	1.88954	0.241787	0.201497	0	0	0	0.312419	0.939482	0	0	0	0	0.0429344	1.0552	0.718313
Macma4_01_g09260	27.3612	23.0916	30.8273	21.6945	20.4429	32.3568	32.6013	23.3834	23.7355	32.4938	33.182	26.283	26.2818	25.0341	30.1666	25.9244	25.1521	26.041
Macma4_01_g09270	14.2554	22.7349	9.16564	21.6073	44.5106	30.6589	29.6866	26.9396	22.9211	18.8353	31.5098	41.4562	41.1113	31.9841	37.9567	16.5261	22.0686	28.3781
Macma4_01_g09280	15.1133	8.61988	10.3181	10.8186	14.304	16.0775	12.3342	9.76178	11.4362	18.2955	8.8952	10.3511	14.8236	14.9683	15.455	11.1424	8.48802	12.1617
Macma4_01_g09290	13.9726	15.2589	11.3806	12.0617	12.1251	11.217	13.1055	11.3549	10.8716	15.8139	8.96097	13.1896	12.5203	13.4647	14.6827	14.6682	11.0853	11.5574
Macma4_01_g09300	13.6546	12.127	14.175	14.5735	7.49304	12.9414	10.1076	12.8889	12.8559	13.457	11.7861	8.75514	9.79441	10.7067	11.2805	12.6158	9.41567	14.3809
Macma4_01_g09310	0	0	0	0	0	0	0	0	0	0	0	0	0	0	0	0	0	0
Macma4_01_g09320	0.200874	2.29137	1.76323	0.255926	1.73158	0.705486	0	1.65011	0	0.248601	0.249192	0	0.482507	0.0627226	0.340396	0.204986	0.0645892	0.381056
Macma4_01_g09330	4.5599	9.66093	7.14281	7.16352	7.23596	8.16159	8.80036	8.92362	4.49607	3.42545	12.0445	11.1016	7.51862	8.66963	5.84444	5.48135	7.41794	8.92499
Macma4_01_g09340	64.9855	92.095	127.383	86.8706	55.6305	130.734	151.902	150.006	74.9128	61.0364	112.9	87.29	84.862	91.0711	70.1426	65.396	84.7151	84.5811
Macma4_01_g09350	39.4214	57.2988	76.2531	63.9391	31.9316	34.9596	61.6746	39.1542	39.3823	30.0647	51.2313	42.1093	35.2959	34.6337	27.9125	62.4789	53.649	40.0886
Macma4_01_g09360	28.5977	31.2319	34.7662	23.887	35.2951	29.1999	36.5625	24.4997	20.4891	32.7781	38.7574	32.0305	26.8076	28.0635	30.4416	22.9568	27.4166	25.4386
Macma4_01_g09370	3.79335	3.74087	2.95854	4.05116	0.835462	4.81866	4.05586	4.68435	3.33968	4.38711	3.98231	3.17383	3.70927	4.19948	4.17656	3.72609	3.13082	4.05975
Macma4_01_g09380	0.823584	0.587163	1.04268	0.295114	0.690227	0.887469	0.0854088	0.657753	0.852177	0.286669	1.34096	0.182002	0.278195	0.385744	0.348906	1.05055	1.19167	0.195291
Macma4_01_g09390	27.9712	60.1395	86.0067	34.1938	43.8227	38.1938	46.3303	43.7729	29.7815	33.6699	80.8082	49.3206	34.1749	33.3604	31.1499	39.1165	47.5605	37.5889
Macma4_01_g09400	0.242677	0.0144178	0.276512	0.014493	0.174327	0.145278	0.0125832	0.0138438	0.0558004	0.211174	0.0846702	0	0.136621	0.227326	0.141362	0.170255	0.0585228	0.0143861
Macma4_01_g09410	5.32617	2.49398	3.23668	3.58143	2.77744	4.36472	4.99155	3.439	4.57216	3.25921	2.2575	3.7839	3.41164	3.36314	4.59637	6.26053	7.15478	3.04982
Macma4_01_g09420	5.05234	17.8997	2.23221	36.2204	26.8869	26.1719	16.221	29.2452	16.8331	4.15124	8.21426	19.4364	13.5949	16.9269	14.131	13.7312	19.3452	19.2663
Macma4_01_g09430	10.8806	13.5735	15.0729	11.7849	10.3952	13.9134	10.323	9.65601	10.6628	14.2205	22.1337	9.836	12.3684	12.657	13.9563	11.2991	9.17381	13.6736
Macma4_01_g09440	0	0	0	0	0	0	0	0	0	0	0	0	0	0	0	0	0	0
Macma4_01_g09450	24.2545	28.6144	19.5746	31.8461	19.9048	35.5776	20.2476	25.9969	25.2371	23.889	19.8846	20.3721	27.8937	25.0605	21.9695	23.1261	20.3776	25.479
Macma4_01_g09460	15.9152	9.22534	7.868	10.9751	18.6335	10.5537	13.9239	8.59397	11.7513	22.7269	10.8105	10.2118	14.5564	15.6174	21.5945	12.8111	8.3739	13.7654
Macma4_01_g09470	0.513736	0.610436	0.780485	1.10452	0.799595	0.553587	1.17208	0.879202	0.531572	0.536456	1.85218	0.737943	0.636288	0.48124	1.36026	0.45872	0.433616	0.365458
Macma4_01_g09480	2.15947	2.06731	1.44259	2.0342	2.33239	1.52564	1.71532	2.15276	1.4368	1.15147	3.43412	4.41341	3.20056	2.61108	2.36173	1.35971	1.66941	2.22256
Macma4_01_g09490	0	0	0	0	0	0	0	0	0	0.178819	0	0	0	0	0	0	0	0
Macma4_01_g09500	158.546	11.0611	6.65449	75.9981	41.9338	97.1336	50.497	52.0948	119.278	143.999	1.77105	60.154	82.9522	70.721	105.225	94.9785	75.3281	89.43
Macma4_01_g09510	0.169157	0.0133998	0.185603	0.202047	0	0.283544	0.701689	0.28306	0.0388955	0.0523371	0	0.0124606	0.0253951	0.343324	0.0477749	0.503474	0.135977	0.066852
Macma4_01_g09520	0	0	0	0	0	0	0	0	0	0	0	0	0	0	0	0	0	0
Macma4_01_g09530	0	0	0	0	0	0.124475	0	0	0	0	0.0604548	0	0	0	0	0	0	0
Macma4_01_g09540	20.8161	15.8785	19.883	18.4478	1.98042	16.2445	11.1212	15.4585	16.09	14.3402	17.3571	11.028	13.6024	13.9499	11.476	13.7979	11.8103	19.5677
Macma4_01_g09550	13.8687	12.9062	7.67707	13.5307	19.2271	12.1271	23.0118	17.6003	17.7354	22.8078	10.5398	25.7702	22.959	20.6381	23.7839	16.5326	12.4139	15.5641
Macma4_01_g09560	45.7664	71.1256	55.9666	48.532	58.9281	39.0505	63.4136	62.3576	38.5189	52.3948	87.0073	70.5339	62.7063	62.9327	57.8636	39.1487	42.8466	48.9012
Macma4_01_g09570	4.02676	4.37029	2.95443	4.78697	5.22344	4.99587	4.22194	5.12239	4.98675	4.16437	1.88801	4.49838	5.09802	5.43532	4.6879	5.29017	3.6855	3.98477
Macma4_01_g09580	13.5943	7.89235	9.564	7.72926	13.6008	12.0825	10.8643	8.83035	8.849	14.52	9.01781	5.05551	9.38853	9.88039	10.0237	9.89075	6.66837	9.27766
Macma4_01_g09590	12.5857	10.8517	10.391	10.6257	12.6471	11.8104	16.7666	11.6838	12.0333	16.7243	13.3862	12.4088	13.7833	12.5705	14.0018	14.5173	11.5049	11.4911
Macma4_01_g09600	63.1621	40.4981	19.0661	67.8689	23.1905	41.3411	40.9962	55.1072	68.9146	57.1325	17.2266	30.4341	59.9619	52.7861	73.4015	86.8877	42.709	48.8669
Macma4_01_g09610	0	0	0.211846	0.0999329	0	0	0.433822	0	0.480946	0	0	0.0924456	0	0.0979668	0	0	0.100882	0.297587
Macma4_01_g09620	6.29782	5.51263	8.82539	5.05931	4.65055	8.45432	6.00293	4.61054	3.90893	5.52056	7.30092	4.87963	4.87084	4.47602	3.34447	4.20372	4.23705	5.07828
Macma4_01_g09630	0	0	0	0	0	0	0	0	0	0	0	0	0	0	0	0	0	0
Macma4_01_g09640	17.3723	5.7449	7.82534	13.7239	7.62726	17.2528	13.8227	6.7925	14.4305	20.8986	7.0783	3.62433	12.8303	12.6768	13.5948	19.2032	9.71626	13.6451
Macma4_01_g09650	48.6559	22.4042	19.6883	32.9194	58.012	35.7746	38.508	24.9523	32.9458	71.0595	25.4747	27.7971	40.4039	41.2521	57.0394	35.1777	27.5893	37.9934
Macma4_01_g09660	4.80287	3.80806	6.06951	4.54764	3.72199	6.25234	6.52933	4.54319	3.88534	5.06593	6.36777	2.83678	3.37251	3.86511	4.15266	4.65612	3.7906	5.17671
Macma4_01_g09670	0.448524	0.338147	0.125317	0.532037	0	0.296286	0	0.324686	0.426755	0.287117	0.374139	0	0.0557261	0.188345	0.275194	0.299876	0.0298384	0.176037
Macma4_01_g09680	1.25825	2.01158	1.67987	0.491857	0.2739	1.04086	0.427044	0.835242	0.526035	0.477781	2.60743	0.202225	0.360624	0.803634	0.726888	1.28401	0.606869	0.542476
Macma4_01_g09690	6.54981	6.83292	6.80245	4.77354	3.13672	5.84834	4.8583	5.24366	3.87999	6.80083	6.27472	5.27454	5.67484	6.78546	5.62013	6.06081	3.50708	6.65998
Macma4_01_g09700	9.61096	7.28615	6.01347	14.0222	4.07016	10.7274	5.13997	9.47917	10.7208	6.89341	9.33005	7.60043	9.39056	8.38918	7.33566	9.82795	9.40502	8.92761
Macma4_01_g09710	17.5983	24.6864	21.1555	22.7723	19.4392	23.4571	15.5962	23.9289	22.494	14.2127	25.6467	20.4991	20.6815	18.904	16.0535	19.6201	20.0059	24.1331
Macma4_01_g09720	4.03997	4.12383	3.54253	1.99496	1.42834	3.97352	1.88954	2.62328	3.14218	4.07706	3.58221	2.82815	2.56443	3.75902	3.69869	2.29651	2.537	3.44613
Macma4_01_g09730	1.97196	2.73458	3.07811	2.7932	2.95534	3.91097	2.5791	2.37162	3.26468	3.85455	4.31699	1.98921	2.94652	2.54265	3.55786	3.03032	2.57356	3.12466
Macma4_01_g09740	162.973	51.8315	23.675	103.278	173.032	118.376	88.8653	81.8488	144.525	209.234	29.3209	84.8773	132.552	114.634	144.18	125.695	78.51	105.756
Macma4_01_g09750	24.1152	13.2129	17.9465	16.7681	23.1925	22.46	21.2249	15.3674	17.4324	27.9441	17.0728	13.0512	18.5169	19.0625	20.0814	19.8102	18.1439	21.8564
Macma4_01_g09760	40.0011	38.8406	38.5626	39.6838	50.7901	36.068	41.1439	48.0564	54.3005	41.0169	44.2125	53.1868	48.5766	43.3368	49.5079	47.5306	51.0507	44.5955
Macma4_01_g09770	0.768578	0.50139	0.808959	0.316805	0.95266	0.433044	1.16275	0.522695	0.873228	0.601488	0.294448	0.879206	0.624434	0.691728	0.523519	0.44598	0.203518	0.614641
Macma4_01_g09780	0	0	0	0	0	0	0	0	0	0	0	0	0	0	0	0	0	0
Macma4_01_g09790	0	0	0	0.488044	0	0	0	0	0	0	0	0.225739	0	0	0	0	0	0
Macma4_01_g09800	8.25439	8.55177	8.6796	7.90517	18.3616	10.3049	8.10229	9.89593	9.24685	11.2601	9.50065	12.6336	11.3033	11.6245	11.3709	8.47067	8.46336	7.6797
Macma4_01_g09810	40.791	47.1127	47.0946	23.2182	6.57192	20.4199	10.4623	17.3518	42.3423	24.365	45.5464	16.4335	29.3529	17.5133	21.9033	39.9772	16.0509	30.2913
Macma4_01_g09820	5.77513	2.88012	1.39024	4.11081	5.21078	3.8	2.30534	3.04049	5.54261	5.64014	2.11813	3.3737	4.96077	4.2965	3.77273	5.2613	3.42323	5.46181
Macma4_01_g09830	0	0	0	0	0	0	0	0	0	0	0	0	0.166242	0	0	0	0	0.262577
Macma4_01_g09840	15.2381	17.8787	19.6079	15.6146	18.9875	16.9866	23.2854	22.0681	13.3745	14.4134	19.1735	14.4704	17.4646	15.1443	13.6243	15.6093	13.0471	14.8112
Macma4_01_g09850	0.0319218	0	0.161656	0.488044	0	0.183456	0.105933	0.145682	0.0293601	0	0.356402	0	0	0.0598053	0.081141	0.0325752	0.0307925	0.121111
Macma4_01_g09860	0	0	0	0	0	0	0	0	0	0	0	0	0	0	0	0	0	0
Macma4_01_g09870	0	0	0	0	0	0	0	0	0	0	0	0	0	0	0	0	0	0
Macma4_01_g09880	26.3635	26.9787	25.3686	24.6885	21.6377	26.6385	21.508	27.5063	25.6599	28.2164	29.263	30.0898	29.6347	27.0791	28.6187	26.724	23.5689	28.2509
Macma4_01_g09890	23.9066	24.4523	23.4383	23.9404	19.8753	26.6541	17.771	24.7009	19.3495	27.1607	30.962	30.0925	30.9232	25.9328	23.4562	27.7138	18.8177	22.9474
Macma4_01_g09900	1.06613	3.11633	5.23702	1.42623	1.31472	1.92748	2.36602	2.01918	1.3728	1.74413	3.32296	2.27356	1.57254	1.77268	1.25335	1.08795	1.82543	1.78227
Macma4_01_g09910	0	0	0	0	0	0	0	0	0.403995	0	0	0	0.395656	0	0	0	0	0
Macma4_01_g09920	0.878489	1.67015	1.18634	0.139906	0	0.420726	2.18646	0.801833	0.53866	0.407706	1.49847	0.388272	0.26377	0.411461	0.496222	0.597647	0.706175	0.416622
Macma4_01_g09930	1.56873	2.79601	5.66026	0.562123	0.281725	1.40868	1.05744	0.626432	1.08213	3.36722	2.28055	1.38668	1.32474	1.74503	0.747656	0.80042	1.04035	1.48793
Macma4_01_g09940	5.08795	1.23424	2.03375	3.60665	0.679653	4.94575	3.55726	2.56315	3.1105	3.40534	2.93583	0.613903	2.21672	3.59227	2.57123	4.34472	1.4418	2.77811
Macma4_01_g09950	20.9392	8.58587	8.24307	12.8254	31.5532	15.4795	18.7416	12.2154	15.0069	28.6308	11.7831	11.4696	19.2987	15.7573	24.7361	16.3529	11.7668	14.8864
Macma4_01_g09960	0	0	0	0	0.447564	0	0	0	0	0.108433	0	0	0	0	0	0	0	0.221607
Macma4_01_g09970	1.37264	1.04385	0.834143	0.839436	1.31472	1.31477	0.637719	1.05241	2.22197	1.57986	0.868434	2.32963	0.741854	0.771489	0.465208	0.728383	0.211852	0.989476
Macma4_01_g09980	10.8542	10.4445	12.5363	2.72938	0.601883	3.59319	1.51662	1.32094	2.55708	11.6656	18.3195	9.81339	2.19555	0.963246	2.0652	3.55609	1.56134	3.07048
Macma4_01_g09990	7.73192	3.75724	4.43388	5.92862	2.39817	6.69702	3.84095	2.65904	5.44582	9.66159	4.49796	2.77005	6.14193	3.98283	4.60316	6.60462	4.52668	6.96029
Macma4_01_g10000	49.763	57.1726	101.695	38.0517	61.0511	54.9092	73.3024	45.9183	35.8688	52.9516	83.2854	47.618	42.3588	48.9298	42.0358	49.953	59.0688	45.3406
Macma4_01_g10010	0.469096	0.668872	0.215959	1.22248	0.592262	0.980332	0.159209	0.622783	1.23552	0.25729	0.178547	0.998951	0.441751	0.898822	0.379393	0.239349	0.658182	0.667404
Macma4_01_g10020	4.18217	3.33142	5.93957	4.68834	1.9469	5.70665	8.10232	4.92615	3.52421	1.40962	2.58682	2.64355	3.64087	4.5961	2.21716	10.9675	9.84889	3.01386
Macma4_01_g10030	1.57498	0.998099	3.13718	1.55513	1.35767	1.10629	0.370218	1.03024	0	0	0.293073	0.255238	0.165513	0.368839	0	0.053574	0.151926	0.273875
Macma4_01_g10040	0	0	0	0	0	0	0	0	0	0	0	0	0	0.139007	0	0	0	0
Macma4_01_g10050	6.18777	24.6049	27.2752	8.66085	2.22598	8.20861	6.55554	11.3752	2.80552	3.88292	23.5691	5.93193	4.18683	3.75539	1.79684	2.60878	4.09133	7.21924
Macma4_01_g10060	0.868689	2.73136	3.18091	2.93718	1.34405	2.5602	2.66101	2.19569	1.16773	1.55061	4.04115	2.12644	2.10669	1.3145	1.01912	2.0457	1.28916	1.52113
Macma4_01_g10070	0	0	0.962473	0.151341	0	0.303408	0	0	0.145671	0.294019	0.147359	0.280004	0	0	0	0.161623	0.152778	0.150224
Macma4_01_g10080	4.96864	3.17519	2.11443	2.89254	1.63965	4.5392	3.08294	2.53431	3.41783	4.84442	3.57396	3.2479	4.11828	3.22676	4.05067	3.40863	2.2756	3.60386
Macma4_01_g10090	3.12368	2.85343	2.36122	2.15489	1.28431	2.36439	3.14772	2.86501	1.99008	2.0225	2.92045	3.1922	1.70194	2.24096	1.7171	1.21285	1.44044	1.76322
Macma4_01_g10100	0	0	0	0	0	0	0	0	0	0	0	0	0	0	0	0	0	0
Macma4_01_g10110	0	0	0	0	0	0	0	0	0	0	0	0	0	0	0	0	0	0
Macma4_01_g10120	50.7965	51.0945	75.6649	41.7146	99.0772	49.1028	61.1681	50.6513	40.7188	59.7553	77.7932	65.3611	51.9202	53.2576	56.2392	47.7154	50.0655	46.6885
Macma4_01_g10130	5.15363	3.57271	4.44107	4.21713	5.18161	5.20907	5.7638	5.92538	5.08049	5.28573	6.09303	3.64948	6.89918	5.92119	5.50048	5.08478	3.24096	4.29405
Macma4_01_g10140	0.0313746	0.238593	1.01686	0.0899396	0	0.120207	0.104117	0.257732	0.259711	0.145609	0.0875731	0.110935	0.113044	0.0881701	0	0.192101	0.151323	0.208311
Macma4_01_g10150	0	0	0	0	0	0	0	0	0	0	0	0	0	0	0	0	0	0
Macma4_01_g10160	1.449	3.11938	3.36679	3.78724	1.67359	3.67387	1.76784	4.08437	3.1358	3.52062	2.49804	2.1473	2.26491	2.11585	2.56376	3.4357	3.86432	1.57648
Macma4_01_g10170	1.18424	1.73974	1.30846	1.33734	0.309346	0.928072	1.87564	0.393055	2.07939	1.09921	0.600992	1.14198	0.581846	1.10933	3.10139	0.439446	2.18083	0.714792
Macma4_01_g10180	13.5103	11.5652	17.1045	11.2847	11.2202	13.8748	18.5297	11.7778	13.0387	10.3325	12.4041	8.7256	8.08809	10.5725	8.11176	20.3648	22.0265	11.9008
Macma4_01_g10190	6.51778	11.9047	17.4308	5.8329	8.77003	9.46822	9.5568	7.92607	4.02063	8.35274	15.9757	8.49417	5.99514	8.31898	5.25549	5.60629	7.2939	7.05991
Macma4_01_g10200	43.0841	68.6754	54.5314	56.7208	105.043	44.9704	75.9964	65.8137	48.3351	41.2127	82.0998	87.3116	63.3604	63.8709	55.1842	47.4249	50.369	55.399
Macma4_01_g10210	0.595586	0.283077	0.414715	0.142277	0.0356534	0.249583	0.247058	0	0	1.03654	1.41997	0	0.10059	0.209217	0.0315396	0.0379861	0.430886	0.0353069
Macma4_01_g10220	9.22665	10.9235	22.1943	7.41386	5.04129	11.7501	10.7688	9.45509	7.29043	10.1408	19.081	10.8807	7.74437	8.76089	9.02581	9.52251	11.0646	9.26857
Macma4_01_g10230	26.5164	37.9911	47.5699	26.1714	24.6637	32.2679	34.2694	33.1378	26.2871	28.0101	47.6589	40.0311	29.2908	28.0288	26.2176	31.5763	31.6958	27.8757
Macma4_01_g10240	8.88926	7.23923	9.40637	6.99812	6.96383	8.83219	6.71437	7.98038	5.97939	9.45787	9.14704	8.71383	7.73225	8.06599	6.54252	5.8489	7.35895	7.58828
Macma4_01_g10250	33.7563	36.389	43.3182	32.9312	44.9938	29.1506	30.2926	35.2307	29.8445	36.4836	44.1013	26.6833	26.4584	26.8531	25.6963	36.5033	35.8353	32.5877
Macma4_01_g10260	21.5918	26.8143	31.9462	20.2218	24.3573	24.2373	35.9103	25.8851	20.1378	21.4597	30.7093	26.4863	22.395	23.2422	22.6381	19.9464	24.4942	25.5099
Macma4_01_g10270	0	0	0	0	0	0	0	0	0	0	0	0	0	0	0	0	0	0
Macma4_01_g10280	0	0	0	0	0	0	0	0	0	0	0	0	0	0	0	0	0	0
Macma4_01_g10290	0	0	0	0	0	0	0	0	0	0	0	0	0	0	0	0	0	0
Macma4_01_g10300	0	0	0	0	0	0	0	0	0	0	0	0	0	0	0	0	0	0
Macma4_01_g10310	0	0	0	0	0	0	0	0	0	0	0	0	0	0	0	0	0	0
Macma4_01_g10320	0	0	0	0	0	0	0	0	0	0	0	0	0	0	0	0	0	0
Macma4_01_g10330	0	0	0	0	0	0	0	0	0	0	0	0	0	0	0	0	0	0
Macma4_01_g10340	0	0	0	0	0	0	0	0	0	0	0	0	0	0	0	0	0	0
Macma4_01_g10350	0	0	0	0	0	0	0	0	0	0	0	0	0	0	0	0	0	0
Macma4_01_g10360	9.44954	4.18912	4.43413	4.72183	9.32758	7.01671	6.41315	5.05102	8.27924	13.9613	5.35041	8.05919	6.26021	6.10423	7.56576	6.17798	4.25099	5.81077
Macma4_01_g10370	0.273011	0.173013	0.0307235	0.666679	0	0.755447	0.0251665	0.636815	0.251102	0.56313	0.16934	0.160886	0.19127	0.397821	0.539745	0.588154	0.263353	0.834394
Macma4_01_g10380	2.42966	1.08687	0.253319	4.77987	5.13339	3.11438	4.32787	2.67422	3.58206	1.39292	0.332436	2.36879	4.66676	5.12094	2.72465	3.35447	1.79224	1.89784
Macma4_01_g10390	1.78656	4.1617	3.25107	6.55653	5.44378	3.1216	4.31625	3.64659	4.15311	3.05233	3.14178	5.96117	6.52549	6.94248	4.58277	3.34574	4.0906	5.36295
Macma4_01_g10400	0	0.100209	0	0	0	0.201948	0	0.24055	0	0	0	0	0	0	0.26796	0	0.152534	0.199978
Macma4_01_g10410	2.61104	0.620502	1.09833	1.05634	0.957993	1.90597	1.20539	0.605411	1.32664	2.53106	1.02854	1.08887	1.1001	1.50895	2.09634	1.39671	0.812474	1.39806
Macma4_01_g10420	9.12865	1.79723	1.56674	5.16436	2.99985	4.95725	3.40645	2.3532	5.09385	12.9934	2.04337	1.94136	6.36489	4.43662	7.52424	7.58103	3.81334	4.65529
Macma4_01_g10430	3.2222	0.777169	1.89965	8.40968	1.98071	4.74468	3.03232	1.71194	4.556	7.99045	4.69827	2.93329	11.1765	10.5869	7.98664	8.19584	6.44836	6.24932
Macma4_01_g10440	0	0	0	0	0	0	0	0	0	0.0308246	0	0	0	0	0	0	0.0961024	0
Macma4_01_g10450	0	0	0	0	0	0	0	0	0	0	0	0	0	0	0	0	0	0
Macma4_01_g10460	6.12338	15.23	17.8277	12.5202	2.2493	10.4271	9.72328	11.4786	6.72204	5.03182	11.4557	5.72319	5.73318	9.02554	3.92374	7.59253	6.83828	9.86735
Macma4_01_g10470	0.0878489	0.167015	0.177951	0.0839436	0	0	0	0.0801833	0	0	0.735614	0.155309	0.158262	0	0.297733	0.0896471	0	0.249973
Macma4_01_g10480	50.994	15.3507	10.1769	39.6743	69.5684	34.5105	37.8404	24.828	38.2541	62.2552	19.766	14.9408	35.4926	34.9943	62.2102	53.1364	30.6009	42.9556
Macma4_01_g10490	0.342684	0.19545	0.46277	0.13098	0.481395	0.393883	0.132674	0.0208521	0.273159	0.742184	0.425112	0	0.473305	0.81322	0.135498	0.396325	0.176299	0.108345
Macma4_01_g10500	32.6665	48.973	70.2924	31.6905	42.1064	35.8766	41.7771	39.7716	24.1633	31.9655	56.768	43.4358	25.9587	35.3718	24.6756	24.9449	39.7357	24.7085
Macma4_01_g10510	2.77477	2.61073	3.46992	2.02915	2.14242	2.25098	3.42956	1.17587	1.92709	4.29695	3.54319	1.48918	2.58868	2.2412	2.77086	2.2248	1.31099	2.61843
Macma4_01_g10520	5.46886	5.81748	4.08829	5.47459	0.997731	5.23829	4.21305	4.27855	4.55093	7.25169	7.99581	5.06441	5.27801	2.80541	5.40598	7.83969	4.01934	4.19915
Macma4_01_g10530	6.75761	7.67271	8.3652	7.5334	8.89963	7.37169	7.86442	5.99661	4.74781	9.06014	7.94645	13.4402	7.18605	8.61605	11.1332	7.94947	5.34158	4.80717
Macma4_01_g10540	1.17876	0.589743	0	0.652105	0.0594223	0.237698	1.02941	1.13253	1.94009	0.287928	0	0	0.95002	0.523043	0.420527	2.91226	0.359072	2.8834
Macma4_01_g10550	13.8395	9.38945	5.73502	16.4568	8.83699	16.8949	15.3689	15.7857	18.7355	17.1949	9.15647	11.098	16.2304	14.1503	13.2435	20.2703	14.3794	17.588
Macma4_01_g10560	9.78515	9.55351	12.4089	9.89558	6.97061	8.98208	6.78196	10.6431	9.93738	7.11468	10.2232	9.53259	7.12474	9.33807	7.39267	10.3183	9.06535	10.306
Macma4_01_g10570	0.253233	0.131301	0.326429	0.153985	0.154349	0.176405	0.305586	0.105062	0.232911	0.299156	0.492637	0.0813986	0.228103	0.0862601	0.253573	0.281909	0.333101	0.262026
Macma4_01_g10580	2.93305	9.67526	7.65287	6.12502	1.45115	5.48854	4.23821	2.88986	1.08979	1.62265	2.96385	2.54116	2.50201	1.69218	2.55097	4.69775	3.4476	1.8608
Macma4_01_g10590	0.842002	0.400196	0	0.603429	0.201618	1.10894	1.13515	0.864596	0.0968039	0	0.881327	0.0930363	0.379223	0.394371	0.267532	1.28886	0.60916	0.199659
Macma4_01_g10600	0.487147	0.984032	0.678416	0.232746	0	0.466609	0.656748	0.16674	0.33604	0.226085	0.169966	0.107654	0.548506	0.456333	0.567537	0.248559	0.176217	0.288786
Macma4_01_g10610	2.4101	4.94613	3.0068	7.82396	3.10335	4.66284	4.85969	5.39023	4.88846	3.7778	3.37097	2.61011	5.67892	6.56363	4.96313	3.82759	4.00303	6.72166
Macma4_01_g10620	21.474	13.3143	18.3943	15.6891	22.8053	19.4865	19.2531	13.8066	15.0486	22.1892	17.6279	13.0834	16.1005	15.5867	21.7151	12.7397	12.1072	14.5563
Macma4_01_g10630	0.947253	5.40265	8.42138	3.67086	0.252023	2.41951	2.40127	2.73789	1.54886	0.683852	0.979252	0.186073	0.805848	0.887335	0.802596	1.28886	2.13206	1.29778
Macma4_01_g10640	4.6696	4.40138	4.31041	5.29041	5.5105	6.00138	5.91732	5.7368	5.654	5.17558	5.04122	4.33671	5.55503	4.33732	5.6426	5.44879	3.99124	5.43826
Macma4_01_g10650	45.6052	38.6412	36.0138	41.2104	60.0299	45.7575	50.7469	44.2281	48.942	53.9101	41.2497	50.8781	53.954	52.109	57.228	47.0469	42.2984	46.7518
Macma4_01_g10660	0	0	0	0	0	0	0	0.0856659	0	0	0	0	0	0	0	0.0319256	0	0
Macma4_01_g10670	0.240462	0.142862	0.563199	0.0574432	0	0.460649	0.261837	0.548699	0.152051	0.251097	0.755079	0.0398545	0.203062	0.126704	0.0382014	0.168702	0.289944	0.185313
Macma4_01_g10680	285.897	131.213	101.535	217.43	313.545	199.299	167.397	149.679	226.695	350.515	135.98	136.11	253.69	250.013	342.198	260.769	158.187	225.321
Macma4_01_g10690	25.3335	17.1367	18.1591	19.9178	34.8764	23.169	24.7416	19.352	19.5994	32.0139	25.1345	24.014	24.2774	27.1152	29.4051	20.7783	17.4934	23.2229
Macma4_01_g10700	0.0219403	0	0	0.115307	0.18913	0.0420306	0.145619	0.0100129	0	0.0509124	0.12248	0	0.059289	0.215801	0.0836539	0.0111947	0.0740743	0
Macma4_01_g10710	1.62349	0.496049	0.734066	1.46821	1.14773	1.53653	1.12242	1.05845	0.799932	1.07637	0.818188	1.50343	1.37534	1.32165	0.966171	0.877668	0.605914	0.916592
Macma4_01_g10720	20.0075	19.2647	27.4263	18.8708	12.6103	25.5795	22.2748	19.626	18.0053	23.9608	23.563	19.1341	21.2846	20.6538	22.1157	21.3557	19.9374	17.9682
Macma4_01_g10730	4.23891	7.04358	6.62582	5.10296	4.79533	5.14718	11.3255	5.78831	4.7276	5.57653	6.92511	4.92715	6.25352	6.47206	6.75896	6.70991	4.5397	3.95727
Macma4_01_g10740	9.31679	8.26921	10.4789	4.03323	2.95812	4.97969	8.37006	8.92665	7.05413	8.36117	5.84277	6.50658	6.07393	5.20755	8.33014	8.35189	5.36252	6.29815
Macma4_01_g10750	16.6732	26.1447	20.3363	23.5445	41.2411	29.9176	35.5425	33.7594	15.955	11.6057	17.7298	26.2216	27.555	23.7745	22.0547	15.4549	16.1124	17.2641
Macma4_01_g10760	12.0806	12.8816	13.9379	10.9815	14.3479	12.7787	18.0927	11.7552	9.64255	16.3421	20.0363	20.3545	16.1429	17.4963	16.0034	12.5209	12.9503	10.0436
Macma4_01_g10770	449.403	223.556	267.915	342.061	501.029	408.222	478.964	279.437	389.909	668.359	286.2	290.84	464.648	504.424	592.259	414.932	349.011	303.253
Macma4_01_g10780	6.36171	7.91056	0.174143	0.558602	0.131746	0.75757	0.969987	0.0941609	0	3.22377	0.0319944	3.58685	0.805353	0.901949	0.932359	0.631647	0.63025	0.424015
Macma4_01_g10790	49.1595	32.3516	21.5135	42.3516	31.8959	37.2812	30.5811	33.3026	45.4024	50.8157	26.8312	26.2896	41.8875	39.6515	47.9593	50.7046	31.4	41.0698
Macma4_01_g10800	0	0	0	0	0	0	0	0	0	0	0	0	0	0	0	0	0	0
Macma4_01_g10810	1.7284	0.854354	0	1.61854	0.0662188	0.827766	0	1.07276	1.68508	0.128344	0	0.0305565	0.52934	0.518104	0.410047	0.56441	0.766937	1.50823
Macma4_01_g10820	0	0.335822	0.715619	0.0843937	0.253779	0.253789	0	0.161226	0	0	1.56129	0.468424	0	0.165467	0	0.0901278	0.0851954	0.335084
Macma4_01_g10830	51.9218	35.8038	36.5232	43.4642	63.9796	46.1355	53.8902	42.1661	42.4228	67.1971	55.8394	51.9396	51.7615	51.6944	58.8989	46.3057	42.0129	48.6251
Macma4_01_g10840	98.6991	177.17	101.423	115.846	160.169	100.326	177.524	158.09	112.289	98.6393	144.586	148.861	165.409	156.382	148.99	99.3836	90.0092	106.735
Macma4_01_g10850	22.9112	14.5784	17.4724	16.5977	25.6776	20.2896	28.7086	16.643	17.7371	31.6948	23.5082	21.8103	18.4242	21.0334	27.0223	22.014	18.2102	22.0848
Macma4_01_g10860	0.300852	0	0	0	0	0	0	0	0.138354	0	0.104968	0	0	0	0	0	0	0
Macma4_01_g10870	0	0	0	0	0	0	0	0	0	0	0	0	0	0	0	0	0	0
Macma4_01_g10880	0.281567	0.152944	1.50737	0.0384357	0	0.231168	0	0	0	0.0373357	0	0	0	0	0	0	0.232805	0
Macma4_01_g10890	934.887	98.9384	72.1715	428.557	305.415	703.63	159.479	428.098	684.047	738.58	73.5725	227.213	230.459	286.122	236.7	654.509	377.19	487.719
Macma4_01_g10900	34.4123	34.2793	42.1679	30.3197	34.6305	36.3566	49.7238	39.3333	34.1786	35.1172	46.8136	37.7157	35.8549	32.209	33.3649	36.3837	35.5901	37.0806
Macma4_01_g10910	135.305	88.5224	62.0534	124.293	69.222	96.0296	97.0384	102.296	120.136	135.426	75.8997	89.7027	127.14	131.71	156.598	151.453	95.2026	109.267
Macma4_01_g10920	13.8283	20.7127	23.9377	16.1852	14.2377	16.7403	19.9004	17.2957	14.1106	15.3371	28.2009	23.2926	20.1127	16.1386	16.8634	16.0155	13.4191	19.4284
Macma4_01_g10930	33.0315	32.3774	31.8322	21.1685	33.2006	24.7536	34.6849	19.6701	17.5092	34.1666	34.8358	37.4368	28.6546	34.8943	34.0156	24.4069	21.7525	25.8367
Macma4_01_g10940	4.26561	3.02683	3.06275	2.5451	6.31065	3.35686	5.63231	2.5042	2.67079	6.56172	4.04327	2.81467	4.92465	3.32045	5.29404	4.08725	2.68518	2.67828
Macma4_01_g10950	12.829	19.6132	33.5812	16.6287	14.9999	15.548	21.6617	17.2792	12.5209	10.8096	23.0312	22.1047	15.2323	16.8619	14.3505	18.5046	29.8543	17.603
Macma4_01_g10960	2.56493	6.93357	4.38382	5.20818	0.230316	1.15162	1.26347	4.60907	2.7277	0	6.86096	1.77131	1.083	2.92828	1.35827	3.84435	1.46905	1.59654
Macma4_01_g10970	3.14755	2.92008	2.72811	2.41478	2.21757	3.08732	2.54853	2.90052	3.25683	2.42994	3.23823	2.74216	3.17597	3.68557	3.24385	3.21198	2.56909	3.07156
Macma4_01_g10980	8.70341	12.1107	11.0656	12.4571	18.8716	17.95	20.2792	27.7024	14.3578	9.23011	11.2678	13.9791	13.0273	14.2242	11.0928	10.7524	14.7904	13.8757
Macma4_01_g10990	1.83804	0.268801	0	0.270205	0	0.270854	0.351899	0.12905	1.04033	1.4436	0.131548	0.999841	0.127357	0.927111	0.958369	0.288564	0	0.536423
Macma4_01_g11000	0	0	0	0	0	0	0	0	0	0	0	0	0	0	0	0	0	0
Macma4_01_g11010	3052.27	8270.51	14722.6	4273.15	5035.34	4689.74	5470.4	7704.07	760.927	1861.15	9407.47	3412.86	1313.12	1870.76	881.645	1405.97	1899.58	1883.54
Macma4_01_g11020	123.472	256.911	447.234	359.929	174.048	263.606	188.419	354.21	34.4204	111.059	207.198	155.503	72.405	35.365	49.4051	57.4862	112.43	90.4277
Macma4_01_g11030	32.6259	25.0842	30.5285	28.2132	20.9461	31.5902	29.5774	27.8869	29.5782	30.1273	33.6913	28.4435	27.9247	27.2733	30.9981	26.9094	23.6713	31.1403
Macma4_01_g11040	0.311276	0.0493155	0	1.09061	0.0496902	3.62752	0.258244	0.189409	0.286296	0	0	0	0.140193	0.194391	0.0439567	0.741177	0.0500439	0
Macma4_01_g11050	0	0	0	0	0	0	0	0	0	0	0	0	0	0	0	0	0	0
Macma4_01_g11060	29.3324	31.405	72.9133	24.7196	27.7075	29.3218	65.8175	27.1664	21.1664	26.1507	46.1702	37.4218	21.2756	29.4586	23.5858	27.5266	29.9193	26.0836
Macma4_01_g11070	7.62619	9.736	8.01586	7.05415	3.94946	8.07972	6.34531	8.66044	7.88076	4.21836	9.71496	8.04435	7.3187	5.35785	5.68205	6.93392	8.30801	12.1012
Macma4_01_g11080	0.267651	0.466444	0.926198	0.447567	0.27772	0.470005	0.462607	0.468233	0.266686	0.434758	0.352783	0.0985794	0.24109	0.167147	0.0755924	0.159325	0.215151	0.253866
Macma4_01_g11090	6.58163	8.01285	7.80673	8.22284	4.53409	5.96703	4.58433	6.13582	3.15621	3.51189	7.97374	9.11567	4.47015	3.5772	4.33896	3.41205	2.80093	4.37319
Macma4_01_g11100	46.3142	8.11045	5.821	28.3272	18.5385	28.9627	12.7151	12.6007	35.3496	51.2566	7.47889	6.37226	26.294	22.0716	29.3349	31.6425	20.0803	32.6891
Macma4_01_g11110	33.3877	48.6064	40.837	34.3663	36.7459	34.3921	34.2127	35.4227	35.177	40.3673	42.6131	46.116	44.7247	37.0481	41.919	38.6361	31.7493	36.6136
Macma4_01_g11120	5.68753	10.0757	9.16436	7.65798	1.76868	10.0819	6.6795	10.9892	8.49205	4.83351	6.90669	8.42271	5.38925	8.16463	6.2897	8.89436	10.0107	9.0377
Macma4_01_g11130	93.3167	111.427	66.7662	100.048	165.605	93.1873	121.426	107.804	131.214	90.6691	97.3363	166.64	126.902	120.711	137.575	116.526	102.865	103.906
Macma4_01_g11140	14.5367	4.8225	12.9445	10.0061	11.1822	9.59405	8.01308	6.53023	8.43484	17.568	5.62785	10.0038	10.2234	9.44369	12.4821	9.22577	7.99937	9.16115
Macma4_01_g11150	4.4216	2.21702	6.49598	1.81073	0.511926	1.9547	0.806218	1.41917	1.34069	0.947105	5.06323	1.58916	0.525206	0.637218	1.39974	3.3221	2.8122	0.967816
Macma4_01_g11160	1.45767	0.831381	1.67321	1.30001	0	0	0.161244	0.177397	0.983174	0.270602	0.0904147	3.60783	1.05041	1.54753	0.823378	0.595003	0	0.737383
Macma4_01_g11170	0.0428392	0.570111	0.780992	0.163739	0.0410315	0.205165	0.0710814	0	0.788027	0.318106	0.837012	0.113604	0	0.200647	0.145189	0.21858	0.0826473	0.243797
Macma4_01_g11180	4.24133	4.60633	4.03042	4.82291	2.66321	4.21691	2.96711	3.27354	3.30794	3.80588	4.77099	4.23002	4.31047	3.25582	3.73874	3.53654	2.54612	3.78399
Macma4_01_g11190	75.5538	71.4143	37.1296	91.2695	107.767	73.595	85.3879	99.9923	103.37	64.7451	57.5633	90.4685	101.914	104.48	97.6725	92.6023	75.5935	76.8067
Macma4_01_g11200	0	0	0	0	0	0	0	0	0	0	0	0	0	0	0	0	0	0
Macma4_01_g11210	1.1618	1.69339	1.26821	5.57541	8.55597	6.05865	8.55694	10.4981	2.57642	0.742882	1.7295	4.53009	3.08137	4.15975	2.5375	1.35683	5.16764	2.81611
Macma4_01_g11220	1.25419	0.317922	0.846846	1.11854	0.880928	0.720787	1.80356	0.839482	1.23044	1.78501	1.40028	0.886915	0.15063	1.95809	0.779283	0.682592	0.564581	0.555143
Macma4_01_g11230	0.665522	0.843511	0.89874	0.741926	1.38112	1.16868	1.65641	0.202483	0.918171	1.6473	1.54801	0	1.19896	0.415617	1.31574	0.565954	0.85597	0.736452
Macma4_01_g11240	40.319	49.4087	51.9208	42.4265	50.4326	47.9978	50.3191	43.1319	39.137	47.6677	59.7857	49.5693	51.089	50.4554	49.3741	44.2446	38.7337	40.2387
Macma4_01_g11250	25.3958	29.4104	26.7836	29.1166	32.4502	29.9938	28.0455	32.9064	32.1772	24.4763	28.5073	30.1799	30.3152	30.9648	27.3095	34.0381	32.2115	29.7545
Macma4_01_g11260	17.8918	11.843	18.775	16.932	12.7676	18.5184	17.7356	15.6236	15.041	16.1278	14.1041	14.0942	13.3543	14.4925	14.0565	16.4575	16.5635	15.4294
Macma4_01_g11270	2.96996	8.00904	9.47211	6.05827	3.79285	3.75264	4.29884	3.6144	2.15042	2.44389	6.52599	3.76107	3.47211	2.92021	1.96316	3.09523	3.63698	3.13665
Macma4_01_g11280	0	0	0	0	0	0	0	0	0	0	0	0	0	0	0	0	0	0
Macma4_01_g11290	8.31715	7.93558	9.05126	6.49705	6.43823	8.32254	9.67564	5.76777	5.91178	9.41635	9.94307	8.18711	7.81266	9.15485	9.61912	8.23451	8.75498	6.9339
Macma4_01_g11300	0.101677	0.0483262	0	0.97157	0	0	0	0	0	0.141565	0	0	0.183174	0	0	0.103758	0	0
Macma4_01_g11310	4.72213	13.1836	0.188294	10.5522	8.65399	9.04608	2.65288	6.41421	8.31017	2.62294	5.43131	15.8091	11.3539	10.2052	10.6798	4.66701	8.14173	4.44365
Macma4_01_g11320	11.486	12.3882	11.4095	12.7845	14.2352	11.2738	14.2937	14.1415	10.216	12.5065	14.8849	14.2534	12.0232	12.7103	12.566	10.5619	10.8361	10.8645
Macma4_01_g11330	54.1891	73.3966	55.6375	67.4604	79.8531	56.9326	54.2501	77.643	61.9299	55.0941	64.0701	86.3746	69.2149	78.8719	67.5574	64.2827	64.5127	50.8885
Macma4_01_g11340	4.30422	4.26152	6.25532	4.01034	4.57939	5.58455	6.30102	4.09187	4.7703	6.13109	7.66542	4.64788	5.52028	4.53455	5.79869	3.9908	3.82991	5.00986
Macma4_01_g11350	5.13975	4.37391	8.2051	4.16288	3.25847	7.3377	8.14239	3.73067	3.26408	7.26965	5.76122	3.63464	4.23287	5.22732	4.45854	5.51969	6.63416	4.80539
Macma4_01_g11360	0.229811	0.174763	0.279309	0.362331	0.484249	0.242134	0.162059	0.167806	0.105684	0.159982	0.181744	0.751624	0.082802	0.182983	0.165508	0.0586286	0.0443361	0.130785
Macma4_01_g11370	1625.42	3627.81	3681.17	1877.95	1200	1690.62	2337.32	2646.57	1240.54	890.892	3314.79	1706.9	1366.21	1268.25	892.759	1492.47	1426.94	2415.5
Macma4_01_g11380	0	0	0	0	0	0	0	0	0	0	0	0	0	0	0	0	0	0
Macma4_01_g11390	26.856	63.198	92.9647	25.0918	20.1209	28.5819	21.4884	28.2167	10.7586	20.2745	58.1917	24.1615	14.7296	15.0943	9.30417	17.4178	19.1128	30.3409
Macma4_01_g11400	35.7242	32.3753	37.3534	27.6509	48.8792	34.0203	43.7887	34.1901	31.11	44.4933	45.6109	37.0424	39.0117	36.9463	43.9042	34.7275	28.7501	34.7069
Macma4_01_g11410	6.70227	9.82654	8.4154	5.62898	4.69413	5.47151	9.78793	6.65067	5.53752	3.8712	10.5994	8.83652	6.51955	6.18711	6.93	5.59742	6.246	6.80345
Macma4_01_g11420	4.35942	5.79216	6.92402	1.98814	0.854073	6.26344	9.04177	3.25556	2.7338	3.40266	5.43875	3.5032	3.61445	3.20197	1.93079	4.29699	4.5397	2.63129
Macma4_01_g11430	0	0	0	0	0.16434	0	0	0	0	0	0	0	0	0	0	0	0	0
Macma4_01_g11440	3.64751	4.24876	5.03125	4.82418	4.90212	4.71376	4.92819	4.63978	4.13225	5.10529	5.78537	6.12091	5.18385	5.27161	5.19987	3.68672	4.6131	5.16201
Macma4_01_g11450	0	0	0	0.0268362	0	0	0	0	0	0	0	0	0	0	0	0	0	0
Macma4_01_g11460	2.46776	3.94004	2.76632	2.74725	4.97968	3.78653	3.5381	2.4711	2.31379	3.8695	2.831	3.17677	3.30193	3.50116	2.9029	2.95835	2.03378	2.59063
Macma4_01_g11470	11.0105	15.0437	15.7015	10.8577	8.21172	13.3867	10.7667	11.4433	8.15551	11.3918	16.8551	7.5007	8.09295	9.81895	7.11495	9.7677	9.85624	12.5599
Macma4_01_g11480	4.69389	7.16364	5.69907	6.24091	8.73042	7.23209	6.96668	7.16671	6.31077	5.42276	8.89468	7.66392	7.18904	7.79893	6.34873	6.26944	5.2617	7.50191
Macma4_01_g11490	12.0444	16.285	13.5078	10.6681	6.18949	9.58749	10.5171	17.8455	15.4786	7.65726	14.7113	8.87223	7.87678	8.83541	9.22651	19.3344	41.1149	16.3275
Macma4_01_g11500	13.5058	16.7566	18.3941	20.1729	16.944	17.2152	17.2022	17.2831	17.0694	10.3513	13.5392	16.9137	15.3695	15.6307	13.5973	17.0063	19.0223	16.8686
Macma4_01_g11510	2.21277	1.71025	3.20462	1.77847	2.27786	1.88178	0.857841	1.09478	1.92107	2.8025	1.86636	1.53554	2.32848	2.01468	1.62954	1.28731	1.45624	1.52997
Macma4_01_g11520	7.4614	8.80567	9.78949	7.45702	5.36348	7.30374	3.70671	4.24116	4.95862	6.31742	9.50556	7.30642	4.70869	5.07815	4.61843	5.47123	5.05688	6.04591
Macma4_01_g11530	364.331	26.1143	37.2541	169.125	57.6458	220.309	131.638	81.0366	200.87	295.537	2.01058	36.0906	120.726	91.0281	91.9184	182.422	103.849	116.722
Macma4_01_g11540	1.80311	1.20444	0.477123	1.754	1.82038	1.15139	1.42853	1.39372	2.55485	2.8648	1.28466	1.37848	2.13631	1.93253	2.60131	2.71859	1.20656	2.24951
Macma4_01_g11550	0	0	0.498568	0	0	0	0.188488	0	0	0	0	0	0	0	0	0.115923	0.365263	0
Macma4_01_g11560	4.76788	3.66001	4.24589	2.64759	5.48003	4.29113	5.88112	2.85743	3.27653	5.16035	4.62019	1.98801	3.63026	3.79213	3.24706	4.92055	3.80085	3.8909
Macma4_01_g11570	17.7087	14.2343	16.4097	13.9175	9.97731	18.0846	14.3058	11.2397	12.7118	23.4299	18.553	15.1932	14.3093	15.0551	17.5576	13.8761	12.3092	13.956
Macma4_01_g11580	487.44	174.322	42.3456	528.534	255.387	289.911	227.149	261.746	716.231	522.242	21.8338	176.412	548.532	611.971	695.711	629.065	592.952	362.306
Macma4_01_g11590	9.31199	14.2798	7.71861	9.80042	15.1456	9.7398	12.3535	11.7669	11.2311	8.76569	17.103	15.4726	15.9845	10.8008	12.9328	9.05436	8.38936	11.9154
Macma4_01_g11600	5.88029	5.28584	7.56357	6.24001	8.57872	8.20917	8.3224	6.84163	5.96087	6.42584	7.72452	7.74659	10.3539	8.84228	7.26714	7.02302	7.69407	9.5677
Macma4_01_g11610	22.4333	22.8588	27.6164	18.0526	28.7463	25.9326	35.1577	20.1386	18.1074	24.7277	32.2418	26.0685	23.9028	23.406	24.6607	20.8851	20.2533	21.9785
Macma4_01_g11620	3.0275	3.46322	6.28856	5.54067	3.63698	8.35554	5.23628	4.21524	6.41861	2.81013	2.10066	2.99368	5.87012	5.33553	3.0869	5.28876	4.65283	5.93783
Macma4_01_g11630	7.19493	6.61513	8.30261	5.83819	6.25868	7.67113	8.68949	5.53359	5.36997	7.19289	8.2964	6.16188	5.60972	7.08234	6.04621	6.34318	5.67746	5.82867
Macma4_01_g11640	62.5767	45.061	36.8528	57.9248	57.379	60.5401	68.7931	52.1875	67.177	82.3822	46.0714	62.9393	76.3889	76.2266	83.6966	62.859	53.5225	64.7734
Macma4_01_g11650	1.3763	1.50314	2.84721	1.14723	1.0097	1.20608	0.485881	0.855288	0.592526	1.76673	0.926329	0.388272	0.237393	1.17952	0.769145	1.76306	3.67211	1.22209
Macma4_01_g11660	4.93303	2.49557	1.09361	5.86688	8.33444	5.92153	3.91695	4.13542	5.27712	6.64226	2.60018	6.84965	7.11341	6.72325	8.84374	4.1914	3.43103	6.64694
Macma4_01_g11670	9.72241	13.0996	14.331	8.77178	8.81329	10.8507	12.009	10.1021	7.10584	13.3149	13.4879	8.92027	10.5365	11.9942	11.1062	7.77325	7.82933	8.9129
Macma4_01_g11680	23.9443	33.5612	22.7188	30.6672	16.7301	23.6213	26.538	31.3044	25.2945	23.7281	31.0705	29.4723	28.7416	28.8702	28.4748	29.3105	24.6848	30.2143
Macma4_01_g11690	9.88173	0.641559	0.245052	4.92808	1.82953	5.54978	2.70456	3.19633	8.33913	6.87916	0.0473917	2.51018	4.82908	2.38574	4.29423	6.82229	2.94808	5.91838
Macma4_01_g11700	0	0	0	0	0	0	0	0	0	0	0	0	0	0	0	0	0	0
Macma4_01_g11710	15.1572	12.3745	13.7723	14.4487	19.7707	16.3243	15.9969	11.8239	12.932	19.5803	15.9073	14.9288	16.2008	16.746	17.5202	11.8966	10.6684	13.6199
Macma4_01_g11720	27.722	16.0687	12.4605	18.5537	11.1272	20.4111	18.2341	12.1824	18.0537	27.8973	15.4392	14.5241	18.0779	19.1821	24.3872	20.1806	19.7057	19.6239
Macma4_01_g11730	31.7942	35.2804	34.9176	27.4118	22.6254	32.0437	29.8026	28.4759	23.1358	41.8768	41.2239	25.659	33.048	32.4145	32.24	26.6683	18.5166	26.2811
Macma4_01_g11740	51.151	54.7044	34.861	50.1311	27.1018	45.1189	39.4652	48.9833	52.402	41.1597	34.3643	52.8275	49.7196	63.5374	52.2114	54.9879	64.215	46.5458
Macma4_01_g11750	6.55924	2.71786	2.0441	3.67622	1.81225	5.43695	2.1453	3.14695	3.90589	8.23478	2.09293	3.34503	3.86313	4.74611	5.71788	4.44088	2.29158	4.0479
Macma4_01_g11760	0	0.692052	0.0921705	0.0869582	0	0	0.377497	0.0830628	0.418503	0.168939	0.338681	0.160886	0.0819728	0.426237	0.231319	0.371466	1.14119	0
Macma4_01_g11770	2.62491	3.9421	11.0118	5.13517	1.75544	5.44504	6.32693	4.21047	2.98568	2.43643	10.3469	2.47132	2.46235	3.69558	2.55305	6.37166	27.8974	4.33121
Macma4_01_g11780	3.01306	3.41795	8.39906	3.34012	2.94695	4.62985	4.58408	1.91097	2.43636	5.93985	7.01263	4.05545	3.5914	3.79456	2.89229	6.3724	5.4529	2.74563
Macma4_01_g11790	18.849	11.0976	8.7714	21.2158	22.4044	17.0784	16.6239	17.243	21.7876	24.2338	9.83505	16.6617	23.2499	19.9235	27.301	28.5923	18.8783	16.791
Macma4_01_g11800	60.6172	58.5417	43.8946	72.5487	85.9732	62.5252	80.4162	68.219	77.2822	81.6189	62.9688	73.3871	96.998	93.989	85.4991	74.2954	56.4325	70.9254
Macma4_01_g11810	2.91248	4.24511	3.45238	2.32948	3.38882	2.62437	2.86374	3.13093	3.61135	3.8648	3.87398	3.48987	2.85665	4.06206	4.18596	4.86542	3.07998	2.86479
Macma4_01_g11820	3.17738	3.43357	0.670879	5.50855	8.4261	6.84027	7.20407	6.36705	5.7496	6.11944	1.41553	10.3563	7.43019	8.77408	7.84847	5.78777	5.23142	5.06543
Macma4_01_g11830	22.0802	25.8028	30.9116	27.1082	10.6655	28.6598	22.1131	27.3601	19.6822	20.141	26.7243	25.7751	22.8319	25.4272	19.1927	25.5327	27.3132	25.9786
Macma4_01_g11840	3.74114	3.52256	4.50743	4.57443	3.02286	5.4006	2.41241	5.1625	3.86491	3.53836	3.86019	3.33834	3.59348	3.37163	4.31157	4.46909	3.1299	6.34014
Macma4_01_g11850	23.2588	19.3929	26.0226	28.0149	7.02028	23.292	15.3887	24.055	17.5957	12.2312	19.4244	21.2146	17.0895	17.4251	14.0796	23.0598	30.323	22.5377
Macma4_01_g11860	7.19146	7.23585	9.52698	7.48795	10.661	9.0098	8.64119	6.6791	6.66592	7.98931	11.5559	10.7188	8.43504	9.24473	8.38563	6.79506	7.51851	8.29697
Macma4_01_g11870	0	0	0	0	0	0	0	0	0	0	0	0	0	0	0	0	0	0
Macma4_01_g11880	0	0	0	0	0	0	0	0	0	0	0	0	0	0	0	0	0	0
Macma4_01_g11890	0	0	0	0	0	0	0	0	0	0	0	0	0	0	0	0	0	0
Macma4_01_g11900	0	0.00604077	0	0.0850124	0.121733	0.0791296	0.195069	0.0638032	0	0	0.0236502	0	0.0114484	0.148821	0.0323061	0.0324244	0.0735599	0.0421926
Macma4_01_g11910	0	0	0	0	0	0	0	0	0	0	0	0	0	0	0	0	0	0
Macma4_01_g11920	0	0.0158519	0	0	0	0	0.00691744	0	0	0	0	0	0.00751055	0	0	0	0.032172	0
Macma4_01_g11930	1.00583	0.780691	1.47669	1.00521	2.04168	1.86498	1.79909	0.614851	0.950577	1.97001	1.11613	1.07672	1.31331	1.26204	1.0086	1.017	1.07707	0.770225
Macma4_01_g11940	5.66895	2.3364	2.70352	3.82595	2.10102	5.27806	2.72979	3.30479	3.23293	4.74676	4.11871	2.03247	3.64232	3.25554	3.73958	3.43863	2.02675	4.07347
Macma4_01_g11950	0	0	0	0	0	0	0	0	0	0	0	0	0	0	0	0	0	0
Macma4_01_g11960	11.511	12.0463	15.6833	14.0704	14.8983	18.0359	19.8315	14.7474	15.8085	14.6729	16.4548	18.3894	14.8213	16.1579	15.5768	20.0797	25.6026	15.118
Macma4_01_g11970	1.33509	0.317278	0.135221	2.07308	0.575439	2.20593	0.0276908	1.06627	2.02611	0.185884	0.496869	0.767102	1.92416	1.50077	0.593883	1.02181	0.321964	0.284924
Macma4_01_g11980	11.8503	5.85238	5.81361	7.40159	9.42903	10.7891	9.93382	8.2108	11.6941	13.6061	6.33111	7.76088	9.64584	8.73029	10.4459	9.54206	7.35282	11.1522
Macma4_01_g11990	91.2394	62.1359	39.2745	88.2403	114.04	73.8902	68.7858	79.6752	93.9308	112.045	64.0858	103.637	105.413	108.567	123.631	90.8496	66.7984	83.6603
Macma4_01_g12000	0.563895	0.338544	0.240474	0.368671	0.170558	0.682258	0.246223	0.352156	0.573236	1.34984	0.165679	0.314815	0.53467	0.889644	0.502928	0.605724	0.0858861	0.760053
Macma4_01_g12010	0.33445	0	0	0	0	0	0	0	0	0.465654	0	0	0.301261	0	0.425064	0.170648	0	0
Macma4_01_g12020	7.89763	8.61954	8.85062	9.0838	6.65385	9.63093	7.18912	8.47664	4.74167	6.24456	9.52516	5.62369	5.79651	8.28858	5.66924	8.35777	12.3443	6.27707
Macma4_01_g12030	5.611	5.09127	3.48726	5.23971	4.55995	7.1252	4.86665	5.43177	5.39529	7.65436	5.97192	5.52348	6.01141	7.44611	7.31128	5.85598	3.44431	4.83819
Macma4_01_g12040	1.7003	4.6468	7.06062	1.62472	0.122142	2.72793	2.68018	1.97872	1.36837	2.48569	5.53688	1.69086	2.25907	1.23438	1.26056	1.77848	1.55814	1.97559
Macma4_01_g12050	27.5046	44.4619	53.3537	34.1516	42.9541	25.9282	23.6695	35.43	15.6929	16.414	35.9711	46.7574	23.0955	22.0093	21.4084	21.5343	42.0907	25.9995
Macma4_01_g12060	0.306165	0.058207	0.496145	0.0585109	0	0.351908	1.57482	0.0558898	0.056319	0	0.227885	0.757779	0.551564	0.688317	0.207528	1.06227	0.295333	0.580792
Macma4_01_g12070	21.2538	41.2728	28.0354	35.589	13.2805	37.177	14.9459	29.0526	18.9431	16.2049	32.2043	18.1164	26.3011	23.749	15.5641	20.8109	20.8924	26.1588
Macma4_01_g12080	7.76199	6.77784	10.7867	2.84603	2.39171	3.60211	2.19645	2.08696	3.56955	3.21139	3.44294	2.73918	2.30347	1.69093	1.55494	4.32885	1.9444	2.31139
Macma4_01_g12090	52.269	5.0402	2.31829	15.9194	11.9053	38.1318	20.1916	21.659	34.5901	33.8052	1.96789	18.5684	19.9916	17.3975	9.37782	22.4118	11.7944	15.2248
Macma4_01_g12100	10.888	7.6721	9.38588	7.12467	9.00451	8.21251	11.4164	7.96867	7.64945	11.5173	10.0574	6.20549	8.01515	8.30391	10.7028	10.4606	8.6912	9.69101
Macma4_01_g12110	58.6843	62.7299	54.0872	63.4165	56.3279	60.5893	59.6151	54.2114	55.7605	64.8183	64.5644	64.7919	62.846	68.7202	65.7837	66.234	73.2623	61.82
Macma4_01_g12120	4.89698	2.50061	3.023	3.51914	4.14766	4.8262	2.66929	3.37073	3.72231	6.12311	3.1912	1.8871	3.3265	3.35512	3.42905	4.46033	3.494	4.01139
Macma4_01_g12130	10.1975	18.5769	21.3707	10.5725	11.2027	12.3009	11.2517	10.6622	7.44652	8.72877	20.9851	15.6252	10.8532	9.71759	8.34138	7.78214	10.0635	10.0207
Macma4_01_g12140	1.44541	2.46172	0.79297	2.3307	2.24968	2.07671	2.17347	1.07192	1.88334	2.18015	1.17671	2.79492	2.87519	2.70797	3.0617	1.04479	1.13285	1.59946
Macma4_01_g12150	25.6202	28.6763	22.8047	27.6354	23.7644	27.6599	23.1051	28.7119	25.434	31.4708	27.254	26.9175	27.2325	27.235	24.3007	23.6684	20.0325	26.3948
Macma4_01_g12160	4.77289	10.6944	7.41628	5.80712	3.46411	5.18927	2.97595	6.34521	4.00132	1.10755	4.63379	4.01592	4.43944	2.91586	2.90742	2.82857	3.54597	4.45677
Macma4_01_g12170	0.0961722	2.47664	0.513591	1.04428	0.912766	0.385219	0.710833	0.319201	0.755882	0.227225	0.984268	0.571897	1.22067	1.72807	0.977827	0.954642	1.1048	1.55901
Macma4_01_g12180	30.7167	25.389	29.9043	27.8273	25.433	32.844	31.1026	29.1991	30.2044	30.9144	28.6464	28.8091	32.9298	28.6865	31.826	27.1816	29.9098	28.9186
Macma4_01_g12190	6.29729	2.77893	3.6016	4.75343	3.03873	5.47176	3.23644	2.87827	4.57536	6.7526	3.86142	3.12639	5.0162	3.94162	5.31125	4.88077	3.2083	4.50926
Macma4_01_g12200	0.617833	0.542977	0.389621	0.278475	0.848566	0.413133	0.735011	0.489441	0.686191	0.497731	0.368762	0.711007	0.283511	0.535073	0.622253	0.392563	0.899586	0.586012
Macma4_01_g12210	6.13508	8.23652	9.51203	7.19596	6.18254	7.57529	7.04377	6.58168	4.84045	6.61218	7.03368	7.7363	5.99769	7.24505	7.39078	7.47718	8.13379	5.04689
Macma4_01_g12220	0.122322	0.189716	0.23474	0.0922773	0.086329	0.178831	0.251035	0.105772	0.13027	0.167321	0.287518	0.193491	0.162376	0.0422155	0.141826	0.183954	0.105574	0.225938
Macma4_01_g12230	0	0	0	0.142438	0	0	0	0	0	0	0	0	0	0	0	0	0.287583	0.141387
Macma4_01_g12240	19.8011	18.322	24.5397	18.7585	36.2933	23.7228	33.5693	20.6264	17.1965	25.1698	25.7195	21.7777	22.9875	24.2294	21.2726	20.0042	22.0391	23.4054
Macma4_01_g12250	23.04	23.2566	21.2726	16.3719	15.3621	19.0692	20.6354	16.963	17.1401	26.7262	28.1161	21.919	21.4874	20.4379	27.9556	19.7705	16.773	18.3037
Macma4_01_g12260	20.8461	17.2263	19.4482	20.2978	28.9324	23.9216	26.2057	22.2147	21.6789	25.0305	19.4623	23.5509	23.2853	24.2042	25.8178	22.7057	17.1218	20.9221
Macma4_01_g12270	0.155393	0.147714	0.658158	0.040496	0.162367	0.297683	0.410196	0.116046	0.0649649	0.039337	0.0657174	0	0.0508991	0.0529323	0	0.144158	0.245284	0.0133991
Macma4_01_g12280	0	0	0	0	0	0	0	0	0	0	0	0	0	0	0	0	0	0
Macma4_01_g12290	0.276835	0.204676	0.249231	0.382096	0	0.353551	0.178633	0	0.169746	0.0856526	0.0572373	0.135949	0.360191	0.172883	0.599428	0.219723	0.474739	0.291752
Macma4_01_g12300	8.53506	9.99599	13.9697	9.27211	9.15754	11.2051	12.2941	8.32352	7.15554	10.6732	11.6398	11.4995	10.2935	10.7181	10.5276	10.1057	9.00281	8.17656
Macma4_01_g12310	0.388712	0.0692818	0.12303	0.232145	0	0.139621	0	0.0886983	0.111724	0.0902005	0	0.107376	0.284487	0.0682733	0	0.0495836	0.23435	0.0921729
Macma4_01_g12320	10.5445	11.3319	10.6713	8.72066	19.9515	12.4652	10.9835	9.90616	8.71623	16.9189	13.2413	12.4844	12.3235	13.4175	15.8117	9.9261	11.1935	11.1883
Macma4_01_g12330	6.70201	9.72017	7.01254	5.0385	9.39281	6.60826	6.88892	7.01679	4.82709	8.34776	11.6917	6.86082	6.41424	6.69354	7.91237	4.60137	4.49216	4.60403
Macma4_01_g12340	4.90472	5.89008	13.8431	5.15535	5.12055	6.42051	8.24671	10.386	2.12022	5.32649	6.03885	2.96262	3.23986	5.06923	2.56269	2.90296	12.8689	4.03182
Macma4_01_g12350	8.92787	13.1567	12.6795	7.48249	2.67522	9.24419	6.37236	8.76341	5.50485	4.74526	8.1441	5.42287	5.75063	6.02707	5.38811	7.15107	6.68755	8.46805
Macma4_01_g12360	0.371891	0.176756	0.502212	1.59911	0.296832	0.89053	7.14766	0.8486	0.541574	0.431486	1.15336	0.273945	0.139577	0.174184	0.0525165	2.37189	5.20165	0.793658
Macma4_01_g12370	25.2898	12.5623	9.96639	31.7968	8.37777	18.0766	12.3048	22.6058	30.2122	14.6051	6.63433	6.00896	11.0047	10.6873	13.6542	36.7223	20.314	27.4592
Macma4_01_g12380	3.64358	6.70359	5.79904	6.69046	1.91378	6.49745	1.75519	3.69346	4.07701	2.96117	4.17111	2.21149	2.8434	3.47602	2.23357	3.37547	2.47809	3.98148
Macma4_01_g12390	39.5464	89.8526	39.3992	90.8704	2.95597	74.2457	27.3904	43.8912	27.5931	26.5142	39.9326	39.2078	54.3057	48.071	21.953	55.2238	64.8712	35.3311
Macma4_01_g12400	113.375	102.656	109.746	165.837	75.2263	96.5441	77.4976	99.2666	98.6912	73.0361	115.126	43.9698	70.9756	82.9052	60.5695	109.981	89.6164	82.3242
Macma4_01_g12410	3.74842	2.33161	2.28044	1.80291	1.65055	4.00003	3.66289	2.64063	1.58497	3.79452	2.85557	2.25713	2.15277	2.95752	1.85444	1.83556	3.77355	2.37422
Macma4_01_g12420	11.6407	11.5325	15.9365	6.98951	5.43751	8.98008	9.32916	9.65338	5.56037	7.10615	13.7001	9.56605	6.06022	6.25117	5.57325	6.90736	7.2007	7.61102
Macma4_01_g12430	0.181506	0.258805	1.89961	0.549218	0	0	0.752915	0.220891	0	0	0.337748	0.106962	0	0.141688	0.615152	0	0	0
Macma4_01_g12440	0	0	0	0	0	0	0	0	0	0	0	0	0	0	0	0	0	0
Macma4_01_g12450	2.96227	2.0665	3.71402	3.173	1.41864	3.77555	3.41883	2.86732	2.18623	3.3261	2.75611	2.10114	1.97971	3.27841	1.97351	2.30375	1.62461	3.26288
Macma4_01_g12460	0.722083	2.16281	0.607152	1.57525	0.978699	1.26583	0.25997	1.67877	0.187963	1.04962	1.96478	0.168604	0.380438	0.918895	0.554094	0.514414	0.683395	1.12426
Macma4_01_g12470	0	0.0318569	0	0.0320233	0	0.0321001	0.333642	0.122355	0	0	0.187084	0.118496	0	0	0	0	0	0
Macma4_01_g12480	11.0523	23.8037	24.3889	16.4282	8.4892	11.4046	10.0996	21.9789	14.2904	13.9757	17.5856	14.4894	9.81123	11.1034	10.5859	12.5862	12.1034	11.2933
Macma4_01_g12490	0	0	0	0	0	0	0	0.0554774	0	0	0.0565509	0.161183	0.0547494	0	0	0.496202	0	0
Macma4_01_g12500	0.113207	0.368959	1.37591	0	0	0.123925	0	0.147613	0.148746	0.870654	0.571783	0.10007	0	0.0151495	0.0137028	0.0660141	2.79246	0.0766976
Macma4_01_g12510	1.63649	0.338179	1.29716	1.8357	0.136299	5.58848	1.35769	0.649432	0.523536	3.56633	1.1254	1.06921	0.512729	0.333256	0.361717	1.23434	0.686347	0.202462
Macma4_01_g12520	6.52771	47.468	59.8885	12.2809	5.47377	11.2399	7.14352	10.0615	2.42958	7.70933	35.6842	9.6544	4.66733	4.23516	2.66858	4.22489	6.9583	7.97427
Macma4_01_g12530	0.029025	0.855309	0	0.0832041	0.556004	0.166808	0.31304	0.0264923	0.347044	0.0269409	0	0.282224	0.39217	0.108756	0	0.0592382	0.0279981	0.357891
Macma4_01_g12540	27.9972	17.2101	8.82191	20.7184	5.51213	17.7587	11.3556	15.2757	31.0721	20.8473	6.74371	11.1367	20.1751	18.9703	24.1961	24.4752	18.2745	19.0902
Macma4_01_g12550	18.0132	16.2958	2.2034	25.0524	19.4439	20.9569	20.0701	19.9929	35.845	21.6815	6.7894	37.1532	39.5842	33.9339	34.9591	28.2135	22.7482	24.3842
Macma4_01_g12560	3.65488	1.38501	0.987966	2.74909	1.02891	2.94492	3.42147	1.69052	3.23665	4.10304	0.953523	2.31391	3.16984	3.2849	3.82908	3.07448	2.08438	2.68196
Macma4_01_g12570	9.81236	7.95942	8.66608	8.42603	5.11268	9.32347	7.48938	9.24273	7.96599	13.0667	9.08076	4.53343	10.1349	8.92206	10.021	9.53257	8.78372	9.6048
Macma4_01_g12580	0	0	0	0	0	0	0.073077	0	0	0	0	0	0	0	0	0	0	0
Macma4_01_g12590	0	0	0	0	0	0	0	0.00924054	0	0	0	0.0715928	0	0.00948357	0	0	0	0.00960253
Macma4_01_g12600	0.199657	0.253053	0	0.254375	0.0637439	0.0637463	0.386496	0.12149	0.42848	0.123547	0.0619204	0.294145	0.239791	0.561083	0.789445	0.203743	0	0.378747
Macma4_01_g12610	0.486505	0.0660662	0.633527	0.464878	0	0.465994	2.0181	0.126872	0.703156	0.387063	0.387982	0.122871	0.876452	0.325523	0.588871	0.63831	0.33521	0.461448
Macma4_01_g12620	50.4262	36.6273	40.9525	37.5305	45.4311	43.1006	53.7896	42.5285	40.8727	66.7874	47.7461	42.5632	47.831	47.7351	57.5611	37.623	34.8196	44.8886
Macma4_01_g12630	0.909733	1.15303	1.01912	0.381961	0.501683	0.712946	0.537468	0.893255	0.418363	0.921178	1.71849	0.950372	1.11744	0.723069	0.408761	0.253187	0.784475	0.941321
Macma4_01_g12640	11.8137	1.6541	1.77439	8.51728	3.01587	8.45836	5.53883	4.12729	12.0741	9.54806	1.67405	3.74599	8.29554	6.37594	7.33167	7.88801	5.96049	7.26431
Macma4_01_g12650	0.279972	0.798409	0.0945205	1.33763	0.178772	1.16206	1.23879	0.0851805	1.03002	0.259869	0	0.329976	0.924691	0.611946	0.237217	0	0	0.354069
Macma4_01_g12660	9.87351	10.9874	6.53853	11.5891	6.09241	11.9125	7.20683	11.8499	11.8972	4.89071	6.55852	14.2245	13.1481	14.4515	11.0805	12.8852	10.0508	8.80218
Macma4_01_g12670	10.9078	11.7217	13.9832	12.5371	16.5946	11.3527	16.4135	13.3337	13.448	10.4849	9.48652	22.3149	16.6903	18.5933	16.9931	12.5835	14.6033	9.40099
Macma4_01_g12680	3.42452	2.5289	1.97787	8.32946	2.00596	7.29222	2.77065	3.71984	3.87856	4.36078	3.15986	2.0014	4.97119	4.58651	4.46025	4.70763	3.90398	4.3756
Macma4_01_g12690	2.66104	3.49048	9.74171	1.74725	3.13254	2.23558	2.15834	1.72325	1.68179	3.89124	2.83546	1.86602	2.35679	2.93834	2.36803	2.66999	2.07933	1.97406
Macma4_01_g12700	3.9881	5.41009	2.81905	3.96959	1.03453	4.61578	5.61781	5.38431	4.85253	4.66574	5.48851	2.71741	3.85427	4.66979	5.0686	4.40887	3.96722	5.71344
Macma4_01_g12710	2.06457	1.90566	5.33367	0.943508	0.372563	1.74825	2.87954	1.66593	1.48609	2.80506	1.67033	1.03151	0.700752	0.644659	1.39436	2.59537	8.37019	1.27711
Macma4_01_g12720	5.12452	1.67015	1.80916	2.63023	0.560947	2.6085	2.72093	1.71058	2.98956	4.64785	1.68919	0.750658	2.11016	1.37154	2.25781	6.2753	2.14677	2.99968
Macma4_01_g12730	0.640565	0.956858	0.185365	0.961854	2.1912	0.438256	0	0.668194	0.336663	1.18914	0.510843	1.37513	0.494569	0.771489	0.155069	1.21397	0.441359	1.30194
Macma4_01_g12740	1.27893	0.628822	0.937993	1.85418	0.760319	0.54914	1.50008	1.04657	0.243371	0.286541	1.10785	1.44237	0.635591	0.578358	0.859421	0.810064	0.170163	0.376465
Macma4_01_g12750	48.2959	10.6378	5.53849	35.7215	13.0014	32.9798	12.3656	19.8655	40.0026	37.4617	6.06708	14.7473	23.3427	24.4338	26.6209	34.3954	19.2324	31.2007
Macma4_01_g12760	1.18501	1.53948	1.12019	4.45384	0.340503	2.61062	0.622644	1.08161	1.05358	0.329978	0.771778	0.384082	1.06742	0.925046	0.635896	0.644943	0.38103	1.6485
Macma4_01_g12770	1.03703	1.52593	1.95677	0.936629	1.2654	1.12937	0.718922	1.63375	1.73775	2.10974	1.66536	1.65756	1.02369	0.904894	1.57677	1.49315	0.698867	1.40131
Macma4_01_g12780	4.31782	2.12823	1.94364	3.39238	2.26693	3.43116	1.37981	2.62736	2.11803	3.88904	3.0353	0.819894	3.37075	3.38556	2.43896	2.61108	2.6533	2.85163
Macma4_01_g12790	4.92918	1.77011	1.85827	1.72702	1.31144	3.4361	3.15792	1.04978	3.62689	6.10034	1.88541	1.74286	2.41735	3.36043	4.94211	4.77857	2.16607	4.0779
Macma4_01_g12800	4.95034	6.97453	7.05814	3.37877	2.04616	3.92314	1.36898	3.96703	3.76713	3.41883	6.18221	6.18612	5.04302	4.23698	2.63396	2.81149	2.146	3.38179
Macma4_01_g12810	4.54314	3.43575	3.46804	3.61408	4.33	5.01613	3.66701	3.95265	5.24892	5.7126	3.1546	2.6509	4.93897	4.32914	5.90676	4.99012	2.61218	5.03088
Macma4_01_g12820	0	0	0	0	0	0	0	0	0	0	0	0	0	0	0	0	0	0
Macma4_01_g12830	11.2729	2.61527	3.72741	5.42857	5.85207	6.98168	5.32091	3.73413	7.9364	16.6156	3.90612	3.3321	7.88522	7.26304	10.4142	8.05803	5.11824	7.70998
Macma4_01_g12840	2.55682	1.46721	2.04585	2.01352	3.88872	2.46188	2.85612	1.80694	1.81464	2.44798	2.30395	2.33722	2.57511	2.42652	2.80888	2.38316	1.72192	2.08778
Macma4_01_g12850	46.604	79.596	54.3496	50.4759	44.4541	47.389	61.013	58.4342	57.1226	63.7097	109.113	75.4127	70.9206	56.4526	72.7509	63.8174	49.8476	73.4307
Macma4_01_g12860	0.908213	1.17727	2.5087	1.02563	0.316323	0.553587	1.50696	0.753602	0.151878	1.76264	0.614548	0.583867	0.371857	0.618738	0.629605	0.505529	0.318575	0.313249
Macma4_01_g12870	29.3542	23.3951	28.117	22.9923	39.9546	27.8184	31.4327	22.8649	23.8826	33.8754	26.3742	25.9315	24.0164	26.7941	28.5486	34.9631	29.6582	26.2791
Macma4_01_g12880	14.0505	15.8604	12.1214	10.7407	11.9917	11.9681	13.2595	10.4657	10.8229	20.3077	17.1345	14.416	14.8258	15.042	12.4788	8.9869	9.14854	11.2564
Macma4_01_g12890	2.29205	1.95721	1.14105	0.965154	1.33952	0.967471	3.19074	0.957377	3.39442	1.73083	1.08434	2.47248	2.5195	1.52842	3.94988	1.78396	1.31159	1.28966
Macma4_01_g12900	0.5805	6.06994	4.26258	2.01076	2.71052	2.57162	1.6856	2.71546	4.20457	3.36762	5.60352	0.641418	2.22229	4.41822	1.47555	1.11072	2.58983	4.54246
Macma4_01_g12910	5.29295	4.91063	4.76041	3.80336	11.4641	5.11036	6.39358	5.21758	3.66088	7.33662	6.60551	4.62882	5.09826	5.4738	6.52966	4.07618	4.37048	5.48891
Macma4_01_g12920	19.9495	4.67622	4.97219	11.347	8.96004	12.5426	10.3118	4.7753	11.2372	20.2013	5.77747	2.80689	8.82598	9.92453	14.6908	11.0379	6.19416	11.9135
Macma4_01_g12930	22.6511	23.9646	22.1653	20.3625	28.5513	21.8535	26.536	18.426	17.8877	25.4457	29.5427	20.6153	22.5977	24.0517	23.9349	17.9052	17.7042	21.0691
Macma4_01_g12940	8.45408	11.5303	10.4239	11.7223	8.66944	8.49373	8.46226	9.35192	8.36726	9.80883	19.023	14.0119	8.44286	11.5777	14.7932	9.7524	8.5982	11.0692
Macma4_01_g12950	17.2465	22.2611	24.2328	16.6968	10.5305	22.2775	16.5137	17.0828	15.6167	17.893	28.0902	21.1849	18.411	19.5219	17.0576	12.5964	11.7911	18.9178
Macma4_01_g12960	14.2937	10.8056	17.5748	10.3184	23.591	15.5993	19.0252	12.1996	11.1464	17.5697	15.7521	10.2319	18.1301	17.9517	14.2097	15.004	13.7475	18.1192
Macma4_01_g12970	20.8673	35.651	88.7998	12.8038	11.0006	16.7506	19.3119	16.7384	21.1706	31.2799	22.6471	17.9861	15.05	15.5183	14.4368	31.1337	227.574	16.6768
Macma4_01_g12980	0	0	0	0	0	0	0	0	0	0	0	0	0	0	0	0	0	0
Macma4_01_g12990	12.1916	10.4672	9.94404	11.9967	7.80135	13.6777	11.3627	10.3702	10.7242	10.4374	7.89192	7.2457	8.34148	9.98683	8.60452	12.6	12.2232	11.982
Macma4_01_g13000	42.7612	62.5396	81.2197	41.3183	47.9176	45.7888	63.0931	56.287	37.3366	47.2909	68.5981	66.9192	45.8412	48.2293	47.3278	41.6209	44.5593	39.5221
Macma4_01_g13010	0.172028	0.163527	0	0.136984	0.274615	0.302088	0	0.471051	0.263704	1.01128	0.426814	0	0.387391	0.456582	0.388686	0.204807	0.27657	0.407919
Macma4_01_g13020	2.24816	2.72951	1.75846	3.93486	2.87817	3.60318	2.75155	2.47864	2.31342	2.78921	5.90231	2.79398	4.25062	4.17021	3.4702	1.90803	2.57658	3.04021
Macma4_01_g13030	15.3166	10.526	11.3677	10.7969	10.8464	12.5063	15.5611	9.60274	10.2538	16.8738	14.6945	6.7696	10.1553	9.71417	14.9136	12.4785	10.4877	12.7416
Macma4_01_g13040	0	0.0139365	0	0	0	0	0	0	0	0	0	0	0	0	0	0	0	0
Macma4_01_g13050	0	0	0	0	0	0	0	0	0	0	0	0	0	0	0	0	0	0
Macma4_01_g13060	0	0	0	0	0	0	0	0	0	0	0	0	0	0	0	0	0	0
Macma4_01_g13070	0	0	0.0136969	0	0	0	0	0.0123435	0	0	0	0	0	0	0	0	0	0
Macma4_01_g13080	24.2282	17.9418	20.1254	19.2252	19.4376	20.7739	28.1571	19.2958	19.0775	24.4069	20.3874	16.244	18.6837	20.2698	21.4144	17.1265	15.0843	18.1859
Macma4_01_g13090	6.47677	4.7595	5.51293	4.76623	5.10447	7.548	7.59189	4.61331	4.96272	6.70709	5.84955	4.70251	5.79987	6.06709	6.02602	5.69971	7.60144	5.92732
Macma4_01_g13100	20.9374	12.3867	12.1151	16.5541	18.2939	19.9786	21.2842	15.3126	22.1742	28.241	14.8609	20.7646	24.3027	22.4599	26.8047	19.4097	14.6916	20.2278
Macma4_01_g13110	0.281835	0.0148837	0.206157	0.149614	0.119974	0.134976	0.610527	0.0571649	0.100807	0.595864	0.174813	0.138405	0.394903	0.0733354	0.291861	0.143802	0.166139	0.0742553
Macma4_01_g13120	4.94699	3.41312	3.6972	3.62155	4.2606	4.80529	4.07107	3.96	3.3758	4.49921	6.23591	5.20164	4.37521	4.51261	4.15772	2.74804	3.16528	3.88809
Macma4_01_g13130	11.4998	11.5088	19.5659	6.05642	6.72506	7.45237	6.17147	12.6787	10.542	6.48197	11.2644	6.87751	3.31612	5.51063	4.79143	12.6647	4.72275	10.7275
Macma4_01_g13140	3.16745	1.47509	2.72732	2.81731	1.71362	3.04266	2.58995	1.85795	1.83024	4.58373	2.31854	1.42818	2.37624	2.87304	3.07819	2.5523	1.76984	2.51081
Macma4_01_g13150	0.171878	0.217846	0.406192	0.383221	0.0548752	0.439018	0	0.522934	0.42156	0.478612	0.159916	0.405153	0.361251	0.8587	0.631065	0.350793	0.331595	0.543419
Macma4_01_g13160	1.77115	0.909156	1.00456	1.0493	1.76427	1.4929	1.49879	1.03462	1.46611	2.49885	1.54901	0.438371	1.6592	0.962287	1.68075	1.66281	1.57181	1.24315
Macma4_01_g13170	0.130728	0.124267	1.32404	0.499665	0	0.62608	1.08456	0.357961	1.68331	0.364024	0.486517	0	0.942037	0	0.221528	0.133403	0	0.495978
Macma4_01_g13180	0.312259	0.148414	0	0.0994593	0.69786	0.299094	0.474943	0.23751	0.382934	0	0.0968423	0	0.0468786	0.0487513	0.0881912	0.159325	0.200808	0.296176
Macma4_01_g13190	0.899756	0.709504	1.05627	0.595969	0.842203	1.07728	1.00942	0.597268	0.695895	1.80317	1.1796	1.03937	1.00387	1.17806	0.909625	0.709497	0.601629	0.688551
Macma4_01_g13200	2.93618	2.4537	3.8235	1.41824	1.82335	1.48346	2.48949	2.38547	2.78958	1.55735	2.25151	0.684514	0.784723	0.87652	0.956844	3.3914	1.49396	2.96858
Macma4_01_g13210	4.20378	2.57697	4.35972	3.29929	2.38601	4.35113	3.05449	2.42422	2.19856	4.65853	3.29769	1.61915	2.45841	2.83973	3.12726	2.68231	2.34999	2.28464
Macma4_01_g13220	15.5995	8.4462	11.7574	12.4836	10.085	15.8433	13.5977	12.0389	11.2195	17.8109	12.8324	9.77335	12.9323	12.2968	15.3226	13.1269	12.0816	13.6176
Macma4_01_g13230	0.0388942	0.0369721	0	0	0	0.0124181	0	0	0.0119243	0.0120338	0	0	0.0467126	0	0.0219697	0	0	0.012297
Macma4_01_g13240	0	0	0	0	0	0	0	0	0	0	0	0	0	0	0	0	0	0
Macma4_01_g13250	17.2	17.3619	10.441	16.4889	11.0007	17.1188	12.9217	14.6764	12.3157	15.237	13.3966	11.4897	11.8091	13.7503	9.7314	13.893	9.72792	15.7827
Macma4_01_g13260	16.6369	17.9095	18.1336	12.0283	12.1095	13.7457	14.351	15.0846	11.8057	11.7863	26.7552	16.1428	14.4153	14.3977	12.4859	12.9018	12.2754	14.0296
Macma4_01_g13270	52.6204	42.4855	77.561	45.3622	28.6848	57.0491	111.618	51.0696	52.2362	47.2011	59.88	47.2688	43.0758	45.2809	44.8394	56.9745	67.5004	55.888
Macma4_01_g13280	13.5116	17.5114	29.0098	14.8743	10.4066	17.1281	15.0377	16.9415	12.8117	14.7072	21.6757	17.3614	13.3628	12.3634	11.3745	11.9403	18.1732	15.0288
Macma4_01_g13290	3.72542	2.09106	3.52164	2.35625	1.86907	1.81816	2.59032	2.16974	2.41483	2.46995	2.32727	0.909521	1.77374	1.16326	2.19452	2.49824	1.40322	1.96869
Macma4_01_g13300	1.31892	1.83131	2.68667	2.05328	0.14194	1.78851	0.479488	0.987412	0.940474	1.63688	1.65455	0.93007	1.5351	1.58254	1.77043	1.08883	0.914882	1.25099
Macma4_01_g13310	3.73607	15.5637	24.8852	28.6859	15.0294	8.48328	13.2552	10.5511	3.07241	6.67045	50.3005	4.33212	8.09655	21.9867	4.30139	3.49857	9.22173	7.2749
Macma4_01_g13320	1.36754	0.058207	0.165382	1.20923	0.0390994	1.21213	0.254004	0.391229	1.25779	0.776764	0.151924	0.252593	0.77219	0.726557	0.69176	0.562377	0.964756	0.677591
Macma4_01_g13330	0.159532	0.581318	0.834817	0.15244	0	0.33108	0.154411	0.145611	0.146729	0.197436	0.618454	0.0705094	0.239501	0.249068	0.112641	0.135664	0.230832	0.126096
Macma4_01_g13340	1.68713	5.67222	7.23074	3.32607	1.22471	4.2186	1.50283	2.59353	1.78041	1.97809	7.4685	0.847709	1.27975	2.57856	1.35425	1.90289	4.21421	2.34139
Macma4_01_g13350	22.7523	20.5858	29.5057	17.5204	25.7627	24.9735	31.6275	19.6805	19.678	28.9788	31.2918	26.8498	25.2536	24.4822	26.2758	21.396	25.7849	21.6201
Macma4_01_g13360	22.4123	15.8288	17.5763	15.8254	16.156	20.3983	12.9784	13.0955	14.9015	27.8209	20.3332	12.9848	17.2045	19.3757	20.5759	17.7457	13.18	18.1504
Macma4_01_g13370	1.71743	1.78097	1.73945	1.79027	0.598166	0.822509	1.42483	0.570023	1.3642	1.37673	2.39685	1.38011	1.40636	1.82817	0.859864	1.51359	1.88258	0.962574
Macma4_01_g13380	3.26397	3.31914	4.22838	3.55407	1.52677	2.47201	6.48634	2.97916	3.56056	1.90232	4.73177	3.75747	2.39308	1.70652	2.05807	1.62666	3.80749	2.1599
Macma4_01_g13390	0.979208	0.86433	1.55848	2.00502	0.535936	1.67486	1.45068	2.04289	0.643304	1.88272	4.03469	1.23653	1.44906	0.720711	1.36303	2.14125	1.21444	1.92389
Macma4_01_g13400	0	0	0	0.0948159	0.38016	0.190087	0.0823217	0.0905684	0.0912639	0	0.184642	0.0877119	0	0	0.588517	0.101258	0	0.188233
Macma4_01_g13410	0.363346	0.23026	0.490673	0.115731	0	0.812063	0.401924	0.33164	0.111396	0.337257	1.12686	0	0	0.226908	0.307859	1.23594	0.350491	0.229755
Macma4_01_g13420	0	0	0	0	0	0	0	0	0	0	0	0	0	0	0	0	0	0
Macma4_01_g13430	49.1456	50.8143	65.4062	43.5776	53.8912	46.447	52.2989	36.0052	32.8128	52.0111	53.5311	42.9661	39.9353	44.4868	41.7057	46.3421	38.7942	30.0055
Macma4_01_g13440	7.03422	11.6617	5.59444	7.59634	2.13375	8.75457	5.51933	10.9607	8.93972	3.28582	9.62534	8.56481	6.96841	5.47439	6.01173	7.70761	10.0088	9.53753
Macma4_01_g13450	32.7389	27.2066	22.4805	30.2091	45.5396	33.1769	38.3552	29.8155	32.6903	44.864	33.5037	41.5636	40.4337	40.722	45.5187	33.9008	28.9184	32.2439
Macma4_01_g13460	6.73495	7.03944	5.24716	7.54212	8.72749	6.85966	3.41319	7.67712	5.01724	4.92189	6.29457	6.00725	5.92934	3.93952	5.08674	5.65996	4.99745	5.08733
Macma4_01_g13470	58.0171	22.4619	19.2902	35.9587	45.1047	40.7562	33.3561	33.1826	46.5852	66.6149	23.4261	26.9003	47.8105	40.0547	56.623	48.0985	31.3539	44.2694
Macma4_01_g13480	45.1463	16.7929	18.635	25.3322	40.5911	32.302	25.9378	19.1248	31.1697	50.817	23.7636	22.2427	28.8647	30.0399	37.2501	34.7519	24.2725	33.6019
Macma4_01_g13490	33.9582	28.4365	27.28	30.4783	39.1908	32.0173	35.0957	31.1127	31.3812	50.2705	39.5085	46.4644	46.1002	40.9247	50.2971	30.8066	25.5311	32.7746
Macma4_01_g13500	1.07171	2.43613	6.32392	0.756918	0.178519	0.892629	0.463889	0.80807	0.342853	0.259502	0.173412	0.164755	1.0493	0.785674	0.710644	0.855895	0.53937	0.662941
Macma4_01_g13510	13.2161	21.276	23.2383	15.6098	12.5285	17.7262	24.9996	14.4507	10.9613	14.2637	21.9783	22.1315	18.5376	21.8558	18.0939	16.9275	21.7772	10.9731
Macma4_01_g13520	11.3431	15.4397	12.2219	12.8683	7.14282	10.9111	13.3951	14.5828	9.38956	12.5224	14.9323	14.6989	13.2392	12.9542	12.3101	10.8611	10.2434	14.6504
Macma4_01_g13530	1.07507	2.91985	3.73323	1.32079	0.294203	1.47107	0.254833	2.24289	0.918171	2.99365	3.64378	3.19034	0.138341	1.079	0.910898	0.470177	1.11111	0.655523
Macma4_01_g13540	18.6503	14.9803	15.2394	16.2842	19.4234	16.0112	22.1619	17.729	22.1348	27.8377	17.788	20.6794	20.926	21.3804	24.928	18.4918	11.5288	18.2111
Macma4_01_g13550	0.339389	0.967851	1.07705	0.778324	2.12378	0.931896	0.31911	1.40431	0.561875	0.147009	0.399973	0.76001	0.611418	1.01735	1.20775	0.346336	0.785717	0.407751
Macma4_01_g13560	14.0128	11.2353	16.3999	11.8279	11.9629	12.6191	18.3249	12.0632	11.282	19.322	17.0541	14.3379	12.597	14.0949	14.2048	13.2018	12.2772	12.231
Macma4_01_g13570	2.71984	2.26885	3.48555	3.39452	0.664559	3.08367	2.83209	2.65983	4.23735	1.67445	3.12445	2.15888	1.82495	2.78178	1.81067	3.90837	1.9811	3.60639
Macma4_01_g13580	12.4752	4.91701	4.48037	7.03382	8.17134	9.1917	8.51478	5.23399	9.62269	15.7289	6.32611	4.89305	8.94969	9.95398	11.6905	10.3779	6.79584	9.63484
Macma4_01_g13590	18.9307	29.696	23.6259	18.2992	13.7897	17.5273	17.6431	20.2882	14	15.6078	21.4989	15.7624	17.9678	21.3108	15.4345	14.9163	18.473	13.8903
Macma4_01_g13600	2.49785	1.79201	1.19334	1.44109	0.586827	2.66339	1.0557	0.860335	2.34074	1.70607	0.0438492	0.833201	0.679237	0.441481	0.958369	1.20235	2.18217	2.63741
Macma4_01_g13610	318.854	147.665	124.127	259.538	66.2167	224.393	191.185	192.316	270.384	369.998	141.655	146.944	261.123	238.928	335.394	302.452	190.718	253.897
Macma4_01_g13620	14.2711	8.09162	10.1517	11.3247	14.9849	13.3496	16.8626	12.1064	12.6626	16.5491	11.4851	12.7892	17.3814	15.44	15.7327	13.7532	12.1398	14.2578
Macma4_01_g13630	0	0	0	0.153931	0	0	0	0	0	0	0	0	0.0120922	0.0503008	0	0.0547965	0	0
Macma4_01_g13640	21.3273	20.9404	19.1133	19.8883	20.7274	23.9929	19.0869	19.8094	21.2178	25.7162	18.922	19.3176	20.4186	20.2835	17.8474	18.5159	16.5598	20.8707
Macma4_01_g13650	199.554	72.3427	64.4095	143.155	100.34	130.085	92.9495	115.635	176.297	193.136	76.2787	84.7178	143.298	124.652	177.694	182.176	104.997	141.248
Macma4_01_g13660	1.16534	0.553877	0.0907911	0.599597	0.429296	1.3738	0.297478	0.613647	0.865704	0.249616	0.125104	0.752771	0.565222	0.251915	0.379762	0.731813	0.518822	0.467636
Macma4_01_g13670	0	0	0	0	0	0	0	0	0	0	0	0	0	0.024757	0	0	0.076481	0
Macma4_01_g13680	0.0134738	0.0128079	0	0.0514992	0.219389	0.0129057	0	0.0491922	0.0495699	0.0250127	0.250721	0	0.0242733	0.0378645	0.0114162	0.0687478	0.0259942	0.0766788
Macma4_01_g13690	0	0	0	0	0	0	0	0	0	0	0	0	0	0	0	0	0	0
Macma4_01_g13700	0	0	0	0	0	0	0	0	0	0	0	0	0	0	0	0	0	0
Macma4_01_g13710	68.5479	22.1912	16.0044	54.9609	40.694	53.2822	28.96	38.8297	58.1685	68.5832	16.6999	34.0846	46.2719	46.6074	55.654	52.8706	31.2645	50.0294
Macma4_01_g13720	13.1449	12.4361	2.67532	14.1083	10.2274	16.0756	7.62864	14.4885	13.1214	12.2358	7.23373	11.1569	11.7731	10.0842	9.88128	9.99375	10.4324	12.7634
Macma4_01_g13730	0	0	0	0	0	0.491502	0.510856	0	0.283174	0	0	0.0907177	0	0	0	0	0.296989	0
Macma4_01_g13740	1.38362	1.12735	0.533852	0.629577	0	0.883524	0	0.661512	1.03019	2.14046	0.49041	0.465926	2.13654	1.6047	1.89805	3.09282	0.635557	0.687426
Macma4_01_g13750	2.24295	0.577446	0	0.982319	0.939884	1.02944	0.814109	2.13253	1.50424	2.16865	0	1.32178	1.51528	0.569041	2.0192	1.19212	1.66777	1.01939
Macma4_01_g13760	150.022	200.985	192.02	152.867	145.33	147.016	161.692	155.869	155.291	170.031	190.719	202.796	157.419	172.501	164.204	156.315	128	151.074
Macma4_01_g13770	23.6557	11.8168	15.6136	16.369	15.1456	19.9211	19.0196	15.3749	17.6979	31.6685	13.7374	15.6759	17.3612	19.2742	23.1909	19.3119	16.0038	18.251
Macma4_01_g13780	20.557	17.3236	6.88423	15.2529	30.4077	24.9872	21.9668	24.5349	23.3836	21.2353	12.6921	42.3198	35.7861	21.9744	27.5112	23.7934	20.161	23.5417
Macma4_01_g13790	20.4212	25.1118	31.7727	17.6866	21.0993	22.1156	19.5879	17.6161	17.6555	24.2301	30.1331	25.0722	21.4161	21.8972	20.1668	19.2076	19.4808	19.048
Macma4_01_g13800	3.20283	1.95133	1.81608	2.46963	1.51607	1.5872	2.27757	1.15128	1.76293	3.25981	1.93292	3.88053	2.36146	2.78014	2.1584	1.76669	3.13723	1.61863
Macma4_01_g13810	0.122694	0.116631	0.0310668	0.0293099	0.146896	0.176282	0	0	0	0	0.256849	0.271139	0.165777	0.114933	0.0519786	0.187808	0.147942	0.0581874
Macma4_01_g13820	0.129605	0.0896005	0.0477335	0.0788098	0.0112851	0.0451423	0.13685	0.193575	0.0650207	0.196854	0.350794	0.218715	0.159196	0.132444	0.129779	0.120235	0.0681929	0.178808
Macma4_01_g13830	0.592811	0.161004	0	0.809225	0.162227	0.973402	0.491814	0.154595	0.311564	0.864673	0.0787933	0.149719	1.29681	0.872635	0.215264	0.604945	1.14368	1.12456
Macma4_01_g13840	0	0	0	0	0	0	0	0	0	0	0	0	0	0	0	0	0	0
Macma4_01_g13850	0.0514338	0.0733381	0.19535	0.23345	0.172422	0.295592	0.0533388	0.129101	0.402103	0.0477408	0.16749	0.329622	0.173736	0.132496	0.250581	0.223068	0.136439	0.0975695
Macma4_01_g13860	1.71048	0.295627	0.224988	0.509435	0.19149	0.893652	0.6266	0.527166	0.898978	1.44333	0.20668	0.490903	0.520248	0.353751	0.319968	0.906747	0.364278	1.30633
Macma4_01_g13870	3.95551	4.04364	7.6323	2.483	2.12936	5.54023	4.87052	2.90761	2.84142	8.30778	6.17847	3.56454	4.0051	3.47992	4.12613	3.76148	5.03173	3.90697
Macma4_01_g13880	0.593574	0.564241	3.15622	0.708983	1.56345	0.852823	0	0.406334	1.22836	0.413216	0.690329	0.655864	0.668337	0.695035	0.62866	1.06002	1.002	1.54826
Macma4_01_g13890	1.59919	0.260599	3.37822	1.22248	1.48795	2.18824	1.32674	0.375338	2.26932	2.58704	1.61543	2.26178	2.26363	1.32683	1.47112	2.42457	1.41039	1.86353
Macma4_01_g13900	1.42905	1.46567	4.18976	1.36552	1.837	2.16126	10.1711	1.54463	0.622595	1.0821	3.07906	0.797818	0.948489	0.669328	0.159318	2.53284	6.56598	0.749063
Macma4_01_g13910	3.69365	4.93454	12.7733	2.22578	1.49798	5.03596	17.0887	4.06991	3.2442	4.84923	13.1271	4.08862	2.09817	3.1483	3.38333	5.29733	9.01978	3.85059
Macma4_01_g13920	2.70476	1.86814	1.77499	1.64557	3.2116	2.45488	2.11789	1.5996	2.04047	2.75503	2.20549	1.28946	2.69184	2.67601	2.39471	1.56097	1.2117	1.86404
Macma4_01_g13930	0.0998283	0	0	0.476953	0	0.573717	0	0.182235	0.550902	0.741284	0	0	0.719374	0.467569	0.422917	0.407487	0.192593	0.56812
Macma4_01_g13940	1.34478	0.993443	2.08584	1.03534	1.67813	2.07566	0.975417	0.876741	0.834	2.41799	4.2469	0.339636	0.685268	1.93637	1.01571	0.454823	0.807975	0.860066
Macma4_01_g13950	0	0.206702	0.770826	0.415563	0.104136	0.62484	0	0	0.0999988	0.100917	0	0	0	0.509233	0	0	0	0
Macma4_01_g13960	0.526711	0.477923	0.315229	0.617681	1.53639	0.940212	0.417113	0.174818	0.154141	0.555559	0.490053	1.18513	0.280352	0.515821	0.42599	0.34204	0.36951	0.13625
Macma4_01_g13970	0.125328	0.238269	0.30827	0.273729	0.325822	0.274386	0.0148537	0.0163417	0.0494016	0.149566	0.216553	0.12661	0.0806363	0.033543	0.182038	0.0182705	0.189976	0.220764
Macma4_01_g13980	11.4044	14.4171	14.4799	11.2569	9.09887	7.83793	11.2952	13.1779	8.99689	8.14103	10.5232	12.6375	9.40423	9.40544	8.9854	10.846	13.0877	9.65724
Macma4_01_g13990	0	0	0	0	0	0	0	0	0	0	0	0	0	0	0	0	0	0
Macma4_01_g14000	24.1445	24.6938	19.5208	22.9711	15.7515	23.1265	22.6381	20.6513	25.8679	30.9669	21.4408	21.1111	26.9379	27.4743	29.9982	33.778	23.3913	25.8319
Macma4_01_g14010	38.2216	32.9878	31.8296	27.9426	17.6652	30.1017	25.9718	37.2121	24.7196	34.2946	34.8277	28.5841	27.9801	31.7688	25.8049	34.8559	31.7779	21.6367
Macma4_01_g14020	16.6896	15.4713	13.5272	11.7838	14.7541	14.0451	18.6363	13.9605	14.5286	21.1134	16.9065	14.0209	15.2885	18.6137	21.8759	13.5404	11.8326	15.706
Macma4_01_g14030	0	0	0	0	0	0	0	0	0	0	0	0	0	0	0	0	0	0
Macma4_01_g14040	4.71882	2.55361	1.84371	2.65139	0.863313	2.94553	2.46329	1.0808	2.71461	4.97056	1.87455	1.04671	2.99289	2.46678	2.80024	2.45279	1.24452	2.63182
Macma4_01_g14050	0.830505	3.60897	8.05104	2.45633	0.681823	1.95084	0.442936	1.73265	0.92754	0.825936	3.55076	1.22354	0.87277	0.870587	0.301576	0.383395	0.839272	1.10657
Macma4_01_g14060	1.26958	9.84197	0.753777	11.8386	9.56032	3.64815	3.10536	6.55318	3.74467	1.58477	2.89195	7.23656	11.495	8.91954	6.52837	3.70799	2.61824	5.81332
Macma4_01_g14070	2.22143	3.23487	3.44668	3.16144	0.18108	4.84408	1.41163	3.3218	2.82565	2.06193	1.89093	1.46229	2.12871	2.52366	1.36159	1.78458	3.87535	3.81056
Macma4_01_g14080	9.99803	6.97998	9.77584	7.84699	14.911	9.72563	11.7962	7.89413	7.69622	11.7728	9.83732	10.2942	11.791	11.4599	10.8748	9.06415	7.90067	9.85634
Macma4_01_g14090	0	0.212788	0.151147	0	0	0	0	0	0	0	0	0	0	0	0	0	0	0
Macma4_01_g14100	207.081	240.517	207.722	195.342	366.095	199.909	224.996	229.256	227.487	253.629	234.72	317.234	258.961	242.755	260.114	229.973	201.499	231.949
Macma4_01_g14110	0.24099	0.366529	0.903096	0.552665	0.507806	0.276996	0.439852	0.28595	0.13299	0.178949	0.852028	0	0.17366	0.316045	0.16335	0.221331	0.255711	0.0914312
Macma4_01_g14120	0.372241	0.294872	0	0.474258	0	0.475397	0	0.226506	0	0.115171	0.173167	0	0.391185	0	0	0.379861	0	0.0588449
Macma4_01_g14130	16.3409	9.79226	9.53307	13.1911	10.1171	14.7505	12.9279	13.9128	15.1739	22.1812	12.99	14.098	16.4621	16.2135	19.5609	18.5964	11.3745	15.4497
Macma4_01_g14140	1.14235	1.69272	1.53132	1.17183	0.370079	1.15855	0.682922	1.15	0.957969	0.654908	1.00033	0.62369	0.680947	0.613729	0.313144	0.428578	0.631992	0.382417
Macma4_01_g14150	0	0	0	0	0	0	0	0	0	0	0	0	0	0	0	0	0	0
Macma4_01_g14160	295.774	65.5051	0	259.511	107.083	453.119	151.574	175.328	386.942	426.393	16.732	201.732	106.082	152.062	89.6706	150.549	205.098	157.063
Macma4_01_g14170	125.523	74.6672	69.1942	113.661	52.1172	140.865	68.5138	122.889	109.801	97.0504	60.413	78.6521	66.049	66.9326	61.5174	87.9316	96.2197	82.3278
Macma4_01_g14180	6.37903	5.92145	2.01205	6.86812	7.8405	7.93642	8.39801	9.00239	9.19089	7.69082	5.11772	8.53315	9.51372	8.26662	9.75246	6.73372	6.65409	9.08993
Macma4_01_g14190	7.85143	6.44157	4.7685	7.41138	6.08648	7.79412	8.21843	8.85543	11.6518	7.76764	6.89987	14.4339	11.0803	8.98636	11.6331	9.40072	7.87556	8.5441
Macma4_01_g14200	31.4923	14.9182	17.624	20.6831	20.2081	27.0875	25.6731	18.7297	24.8078	36.0482	19.1643	18.1286	32.7636	27.6467	34.9671	24.3769	19.3601	29.1196
Macma4_01_g14210	3.57252	6.26307	7.9188	3.04995	4.90828	3.5341	3.61981	2.64605	3.42049	5.0012	7.38339	7.29951	3.85105	4.69065	3.94497	3.34682	4.2653	3.02745
Macma4_01_g14220	11.5143	5.93065	7.72765	7.68935	14.159	9.2684	11.3906	7.26328	9.31101	12.7716	9.46508	9.73899	11.5708	12.0981	12.9462	10.7463	7.54197	9.50779
Macma4_01_g14230	4.70619	6.36249	9.32122	3.39772	6.31065	3.70639	4.68528	5.82283	4.80946	3.68877	8.95192	3.60538	5.36961	5.19224	4.69639	7.15042	9.28116	5.25737
Macma4_01_g14240	445.649	845.487	35.3653	1144.45	1147.8	501.569	619.563	936.326	1272.5	154.23	330.275	789.975	810.466	777.92	742.852	863.986	768.098	913.167
Macma4_01_g14250	17.4094	19.5516	16.2705	7.4276	8.47329	12.0781	19.541	11.7572	10.724	19.4348	15.8304	15.4654	11.2806	10.5639	14.8553	11.5332	7.35533	10.5326
Macma4_01_g14260	11.5217	9.97444	9.47528	5.79387	7.43043	9.4246	13.2939	6.81572	8.66022	13.5141	9.18842	10.3451	9.90956	6.53016	10.1519	8.36119	6.61942	9.40154
Macma4_01_g14270	1.30858	0.529918	0.820177	0.487827	0.725039	0.477757	2.29298	0.653435	0.766396	1.01309	0.283903	0.404594	0.576146	0.917981	0.362952	0.646724	0.396233	0.345082
Macma4_01_g14280	0.138884	0.132021	0.140665	0.0796261	0.319257	0.0798173	0.184356	0.0253531	0	0.0257824	0	0.147321	0.100082	0.104079	0.070605	0.113382	0.107177	0.105385
Macma4_01_g14290	7.55533	8.94905	10.4226	8.1203	3.21764	8.36873	9.22043	6.94453	8.82976	8.60275	10.2169	8.01661	10.1784	10.0875	11.3068	7.19507	6.99344	8.31228
Macma4_01_g14300	16.4946	10.9321	11.5086	12.6966	11.3223	10.7522	12.7341	13.717	11.8417	13.0137	9.549	10.4088	14.5275	12.0605	14.3251	11.7825	10.9167	11.6034
Macma4_01_g14310	1.62283	1.92829	2.2189	1.29224	1.11395	2.90156	2.37854	3.30805	1.46772	1.5063	3.90053	1.69749	0.950158	2.12824	1.55833	1.15923	2.32203	1.79578
Macma4_01_g14320	27.7367	26.2132	32.6821	13.7279	24.2267	25.3359	36.5033	32.2395	13.9526	28.967	34.5978	21.9326	13.6646	20.1114	20.451	18.6619	19.0357	16.675
Macma4_01_g14330	0.615321	0.517423	1.36627	0.927179	5.1002	1.65479	0.726465	3.75859	0.326505	0.0659008	1.47528	0.0836792	0.0639529	0.0221692	0.120313	0.0241506	1.1871	0.314262
Macma4_01_g14340	0	0	0	0	0	0	0	0	0	0	0	0	0	0	0	0	0	0
Macma4_01_g14350	4.36429	13.3157	22.8855	9.98849	6.9107	6.50642	5.13913	8.7058	5.50314	5.91305	8.84152	5.16451	5.9919	8.671	4.86083	5.20786	10.2871	5.20777
Macma4_01_g14360	0	0	0	0	0	0	0	0	0	0	0	0.114422	0	0	0.0548379	0	0	0
Macma4_01_g14370	2.80482	6.76613	5.76195	3.2111	2.45837	3.39622	3.33677	5.02353	2.84743	1.37539	3.02813	2.54949	2.26429	2.2556	2.19713	1.86315	3.72656	4.24151
Macma4_01_g14380	9.25212	28.9692	44.7951	44.5194	21.4906	25.461	21.177	20.3108	11.3745	15.9995	72.5496	9.08845	16.977	34.1235	14.493	9.73781	16.6783	20.3679
Macma4_01_g14390	6.78011	2.1989	2.38327	4.94477	6.51311	4.52688	4.1112	2.87582	5.30977	8.4219	3.43242	1.84206	4.40083	5.33317	5.5504	6.51189	3.00082	4.40706
Macma4_01_g14400	9.18044	2.25791	3.17721	6.3494	5.76924	6.73904	5.71228	3.51274	8.23169	13.9261	3.22638	2.99443	7.33052	7.22904	9.57874	7.06717	4.1958	6.96799
Macma4_01_g14410	0.233641	0.481205	0.157758	0.595345	0	0.895162	0.129224	0.284338	0.716303	0.361442	0.3623	0.27537	0.350758	0	0.329935	0.794744	0.638562	0.369345
Macma4_01_g14420	44.661	24.123	28.4151	33.0784	19.5604	22.5755	24.9421	26.5852	31.5929	45.1833	18.5648	19.532	29.1313	37.6963	41.7553	49.1966	21.6374	33.914
Macma4_01_g14430	53.1818	32.6141	25.9296	44.9123	76.0702	56.2109	54.3968	43.1335	63.547	81.8139	30.912	69.5051	69.2052	52.3057	71.8801	64.4208	41.9517	63.6922
Macma4_01_g14440	0	0	0.120021	0	0	0	0	0	0	0	0	0	0	0	0	0	0	0
Macma4_01_g14450	13.5593	14.8317	17.3308	14.8909	6.58503	14.7986	16.9847	16.1064	16.0895	16.9996	19.0656	15.227	13.6587	12.6658	15.5825	14.0317	15.6402	17.5524
Macma4_01_g14460	1.00965	8.33614	11.5991	4.63087	1.24334	2.90124	2.87189	2.8173	2.22869	3.88249	5.52892	3.64642	2.54647	4.16144	1.85757	3.82688	4.25746	3.42016
Macma4_01_g14470	0	0	0	0	0	0	0	0	0	0	0	0	0	0	0	0	0	0
Macma4_01_g14480	0	0.108508	0.115612	0.283593	0	0.349876	0.227283	0.0833506	0.0839907	0	0	0	0.246771	0.213857	0.154747	0.209674	0.0440442	0.0216539
Macma4_01_g14490	0.540055	1.36898	0.546979	1.20411	0.172422	0.862143	1.19479	2.30034	0.662287	1.16965	1.33992	1.43215	0.324308	1.18042	1.06769	1.10222	1.0419	0.341493
Macma4_01_g14500	0.316763	0.150555	0.320824	0	0	0	0.525592	0	0.291343	0.588038	0	0	0	0	0.134195	0.161623	0	1.05157
Macma4_01_g14510	0.20983	0.332435	0.354201	0.668341	0.133984	0.0669946	0.116054	0.702242	0.611139	0.129843	0.29284	0	0.724528	0.556913	0.325942	0.392563	0.337345	0.829263
Macma4_01_g14520	8.01597	10.3745	11.9883	7.0948	8.76863	9.48705	10.7409	8.47451	7.54507	9.43434	11.9517	8.64053	8.36331	10.2235	8.23327	9.5483	13.9628	9.66799
Macma4_01_g14530	15.0491	8.63541	6.27527	10.9024	6.33555	11.053	8.21961	10.2162	12.2208	13.7138	6.16774	15.5879	15.0908	12.7713	13.7543	10.6999	8.63756	10.3836
Macma4_01_g14540	59.8198	47.1172	42.1527	49.4502	31.3402	52.3389	45.0648	50.779	62.3105	62.5262	48.1679	57.4542	60.8421	54.8046	59.4576	61.6633	44.4968	60.1531
Macma4_01_g14550	3.2204	5.62223	7.01835	3.48435	4.35672	4.57293	5.13557	3.90013	2.13215	4.41979	8.9655	5.89275	3.4539	4.75394	4.43797	2.92828	4.35148	3.20905
Macma4_01_g14560	10.3073	6.42703	6.05125	9.68428	10.6719	10.4014	7.17183	7.03388	5.88225	7.06335	5.80275	11.8189	7.79918	8.82809	8.75079	5.40699	5.54366	6.6943
Macma4_01_g14570	0.0122012	0.104385	0.0741461	0.069953	0.116864	0.0116868	0.0404901	0.0111366	0.0448883	0.0453007	0.0454083	0	0.0439617	0.0228589	0	0	0.0117696	0.0115728
Macma4_01_g14580	6.42027	10.8053	6.66249	7.04	7.40947	7.0569	11.0022	13.1611	7.3571	5.81275	14.7377	18.1886	7.82147	5.61979	8.33808	4.18878	8.98512	8.33576
Macma4_01_g14590	36.6088	22.8623	31.5988	28.7505	40.302	37.1306	40.9854	29.359	28.3586	38.9957	32.6871	33.7177	35.6125	34.2748	33.5149	30.0905	43.9672	32.3002
Macma4_01_g14600	29.9352	27.2004	25.303	25.099	24.2798	22.1724	29.6134	25.9837	24.1925	33.1659	34.2003	32.4605	28.782	32.1998	37.828	23.7345	22.6479	27.2103
Macma4_01_g14610	20.5081	11.8375	7.64074	18.3248	36.3394	24.0921	15.3617	17.6889	22.9801	25.8252	10.0939	20.6678	21.8865	19.3925	20.7813	17.3934	14.3927	22.202
Macma4_01_g14620	0	0.0852119	0.0907911	0.0642426	0.300507	0	0.130147	0	0.041224	0.0208013	0	0	0.0201865	0	0.151905	0	0	0
Macma4_01_g14630	75.3935	48.5566	64.4625	57.0846	91.6475	70.9631	66.8854	55.209	56.3858	95.4795	72.538	56.9205	62.22	70.6245	72.1661	65.7699	59.0952	66.7839
Macma4_01_g14640	0	0	0	0	0	0	0	0	0	0	0	0	0	0	0	0	0	0
Macma4_01_g14650	31.5145	56.8411	53.0521	33.5993	37.4862	37.5717	38.3108	37.646	31.5844	36.2757	64.9701	43.6488	38.9496	35.1591	35.6904	30.954	26.1569	36.4178
Macma4_01_g14660	0.721387	0.304772	0.243546	0	0	0.0767748	0	0.21948	0.0737217	0.074399	0	0	0.2166	0	0.203741	0.0817948	0	0.836284
Macma4_01_g14670	18.8963	6.78053	3.35875	20.956	2.84668	16.002	11.1348	8.59514	18.9337	20.182	6.14176	6.19465	15.8657	13.4516	13.7574	19.0277	7.51443	16.5877
Macma4_01_g14680	1.58332	5.82611	3.10379	5.71012	3.62006	4.20726	3.47461	4.94153	2.67764	1.94372	3.5165	2.48313	2.8524	4.44952	2.76961	1.61573	2.06926	3.43955
Macma4_01_g14690	18.5908	8.21036	3.02438	5.92146	6.61204	7.90399	5.75385	8.87994	12.049	7.89782	3.37575	18.7608	12.4076	9.53458	7.3454	9.99355	9.38469	9.19735
Macma4_01_g14700	0.305031	0.724893	1.54471	4.37206	1.02256	0.584342	0.379595	2.22731	0.280552	0.141565	0.141901	0	1.09904	1.14295	0.258449	5.44731	3.53087	0.867962
Macma4_01_g14710	42.5221	76.4517	28.7856	77.2437	65.0097	100.426	48.8635	70.0936	67.9221	26.7366	38.1347	64.8667	78.6168	70.0116	57.4273	59.9636	51.8704	51.8221
Macma4_01_g14720	55.6106	42.3235	12.193	66.1578	54.4965	91.0166	45.1711	63.3229	80.718	42.3576	21.7293	65.2832	80.0679	72.4184	63.2474	57.7382	54.0173	50.1384
Macma4_01_g14730	5.62956	12.8433	3.78004	13.8268	25.4223	12.8015	11.4859	18.0983	11.1994	4.41252	6.94488	12.9752	12.5082	12.6563	11.271	8.61718	12.5301	11.1934
Macma4_01_g14740	86.9482	100.262	62.8888	109.133	156.508	107.037	84.618	109.396	130.135	84.1925	76.6781	117.921	109.728	112.187	107.651	107.01	96.494	107.151
Macma4_01_g14750	18.5127	21.1321	21.9905	14.7063	29.5244	19.7083	14.1963	19.4148	18.1331	17.3678	24.8202	29.4324	20.114	20.0287	18.976	16.1671	16.3785	15.5187
Macma4_01_g14760	75.7958	127.139	141.449	105.684	113.016	90.848	83.4551	99.3698	62.8965	62.8076	124.82	83.9267	78.1116	82.3788	61.7035	61.3714	67.4296	79.4637
Macma4_01_g14770	0	0	0	0	0	0	0	0	0	0	0	0	0	0	0	0	0	0
Macma4_01_g14780	2.69391	0.781256	2.45098	0.80715	0.546661	3.7393	2.48118	0.958532	1.91079	1.90715	1.0408	0.363248	1.06934	1.09067	0.831766	1.44442	1.38739	1.75397
Macma4_01_g14790	1.0341	0.56171	2.09471	0.282322	0	1.415	1.8384	1.0787	1.22285	0.411363	1.37447	0.522338	0.133068	0	0	0.753759	1.71002	0.700597
Macma4_01_g14800	18.8248	42.4316	36.4712	36.4528	8.53713	46.8536	3.19451	16.336	10.2966	10.5898	26.5373	17.4596	19.012	13.4259	10.0896	18.0458	11.5556	19.005
Macma4_01_g14810	0	0	0	0	0	0	0	0	0	0	0	0	0	0	0	0	0	0
Macma4_01_g14820	4.47106	7.12243	10.3755	5.30516	5.90594	5.6238	7.09256	4.91055	4.97086	6.31626	8.91404	6.18889	4.27078	5.68405	5.30775	5.81603	10.4741	3.63495
Macma4_01_g14830	4.05114	1.90431	2.34462	1.51013	1.06599	3.60318	2.82541	1.44249	2.60004	4.07018	1.76034	0.747685	1.98496	1.98085	1.94256	2.90747	1.11652	2.25905
Macma4_01_g14840	27.0751	80.6357	54.9034	49.8554	4.9528	40.5143	14.8946	38.6598	20.0929	12.4038	35.6779	14.3804	21.7715	17.5252	9.94414	22.2932	20.4006	24.0274
Macma4_01_g14850	0.479757	2.73629	0	1.37529	0	0.765885	0.619144	0.486549	0.539314	0	0.0991929	0.753925	0.336115	0.0998691	0	0.489578	0.102841	0.202243
Macma4_01_g14860	178.37	92.1885	64.8474	88.5976	96.8518	105.451	112.878	147.452	125.409	84.6179	92.4763	82.4778	87.0016	99.1159	73.2393	130.179	92.8214	147.593
Macma4_01_g14870	9.03888	2.41434	1.28621	0.785187	0	1.00173	0.185924	1.84094	6.2523	0.832054	1.32055	1.25462	0.269153	0.55981	0.379762	0.990997	1.15294	2.05477
Macma4_01_g14880	11.8962	10.7284	13.2073	8.52553	2.9216	10.226	0.822455	11.2062	6.03187	5.66259	9.72021	7.07787	2.74761	4.85752	3.166	9.41606	13.7557	13.2364
Macma4_01_g14890	48.3119	26.3035	34.1232	35.8023	50.1056	34.4556	43.0592	30.3759	46.5672	65.0086	25.1189	25.22	39.1052	38.5306	45.7816	49.5298	30.8761	37.5243
Macma4_01_g14900	4.84114	2.13259	2.15263	0.90262	2.37498	2.82746	1.07756	1.93992	1.62901	1.97277	2.52675	1.25249	2.23354	1.32729	1.00045	2.89184	3.07528	2.91187
Macma4_01_g14910	0	0	0	0	0	0	0	0	0	0	0	0	0	0	0	0	0	0
Macma4_01_g14920	0	0	0	0	0	0	0	0	0	0	0	0	0	0	0	0	0	0
Macma4_01_g14930	0.389478	1.14155	2.26821	3.69063	1.46109	1.98964	1.34635	1.92558	0.656741	0.0301261	0.181186	0.31559	0.701655	1.27695	0.1375	0.861142	0.970556	0.153924
Macma4_01_g14940	13.152	12.7633	16.8756	25.7407	23.513	13.4481	11.3498	12.8149	21.7621	15.9367	3.06899	13.5135	32.6835	38.4655	32.481	16.3125	12.5439	12.8957
Macma4_01_g14950	2.22362	5.88168	8.24964	1.29334	2.15294	2.36137	4.81247	1.8531	0.689133	1.30119	17.0231	1.43145	0.653136	1.22261	0.471011	1.13457	0.209832	0.756521
Macma4_01_g14960	28.4562	17.8893	31.2181	18.2903	24.9706	23.3757	30.0325	20.305	27.914	25.6398	18.0557	26.9782	25.3595	19.704	27.8002	26.9907	40.0511	23.8839
Macma4_01_g14970	6.78323	3.99877	12.4356	6.43144	4.91052	7.20237	4.05709	3.43163	2.20053	3.97782	8.95301	3.71848	2.41561	3.02931	3.45286	3.16591	10.5757	3.84037
Macma4_01_g14980	0	0	0	0	0	0	0	0	0	0	0	0	0	0	0	0	0	0
Macma4_01_g14990	0	0	0	0	0	0	0	0	0	0	0	0	0	0	0	0	0	0
Macma4_01_g15000	2.5768	2.52482	9.67646	2.3486	0.0379702	1.89858	1.84179	1.99011	1.38554	0.699135	1.25406	1.12136	0.428508	0.371354	0.201534	1.37545	9.82781	0.827227
Macma4_01_g15010	0.222045	0.0191883	0.327115	0.115731	0.0193341	0.251353	0.0837341	0.0184245	0.0928297	0.168629	0.018781	0	0	0.245817	0.119723	0.0411981	0.214189	0.0191462
Macma4_01_g15020	9.37465	7.14936	12.7521	7.54094	6.79533	11.7092	10.9762	7.33002	7.39057	9.98763	10.0933	8.40144	9.85939	9.29389	8.79505	9.24024	10.5405	9.86319
Macma4_01_g15030	5.80439	1.19875	3.53428	1.07296	2.79628	2.53164	1.64816	0.867215	1.62064	6.60625	1.54298	3.9779	1.98398	1.94996	2.29799	1.94796	3.36609	1.13058
Macma4_01_g15040	26.7527	8.88231	7.38261	20.8459	6.30075	17.5784	7.9344	17.2462	24.38	26.6673	8.95829	13.9147	14.808	12.7119	17.1592	23.6339	15.4588	24.48
Macma4_01_g15050	21.8814	24.543	28.8632	21.7362	19.2549	25.77	30.7029	23.7662	18.6598	23.6757	37.4941	29.9982	26.0546	23.4178	23.823	18.9828	20.8956	23.8758
Macma4_01_g15060	2.15517	6.07284	1.61761	7.57552	0.86624	4.40509	2.29885	3.21412	0.902617	0.446524	1.0742	1.53086	1.95863	1.64031	1.54888	2.16001	0.742474	1.56963
Macma4_01_g15070	7.34419	6.92108	4.70241	4.92046	5.92255	6.06427	7.12597	4.81562	6.28897	6.69934	5.28188	7.14484	5.96905	5.93073	7.24187	5.83625	4.35648	4.16355
Macma4_01_g15080	0	0.832515	2.31991	0	0	0	0	0	0	0.312658	0	0	0	0	0	0	0.129971	0
Macma4_01_g15090	3.45258	22.837	72.6324	2.37122	1.41232	3.20367	16.2911	1.3787	1.5216	1.93616	1.77345	0.41328	0.485931	0.909615	0.731332	4.69766	19.6704	0.750465
Macma4_01_g15100	0	0	0	0	0	0	0	0	0	0	0	0	0	0	0	0	0	0
Macma4_01_g15110	0	0	0	0	0	0	0	0	0	0	0	0	0	0	0	0	0	0
Macma4_01_g15120	6.45254	3.51974	5.34955	5.15109	1.85147	6.72814	4.38196	3.85178	5.08333	3.79066	3.52102	2.88797	3.06551	3.95308	3.09114	5.11211	6.85457	3.87355
Macma4_01_g15130	6.46336	5.76779	2.73873	6.74322	2.81105	18.8569	6.67539	3.10018	0.697589	10.0396	4.04993	7.69547	1.18815	4.13932	2.54258	12.5856	15.1732	3.12779
Macma4_01_g15140	2.1558	8.9015	15.8982	1.60935	0.709787	2.12944	1.50906	1.29129	0.929436	2.50127	5.64121	1.48877	0.242733	0.25243	0.0570808	0.893721	10.3977	0.766788
Macma4_01_g15150	114.155	163.861	294.805	71.1189	100.363	99.899	95.5566	115.464	51.8909	78.2796	185.311	135.766	34.466	65.0108	28.2847	86.3102	148.344	64.5763
Macma4_01_g15160	9.60573	8.69174	12.0357	10.2196	8.12544	14.0066	12.6932	7.51718	6.95252	8.51771	9.8432	8.54937	7.83481	9.41556	8.36256	9.33075	13.1346	6.07399
Macma4_01_g15170	39.3713	87.7532	305.768	107.759	37.8556	31.3464	279.506	53.5766	33.6751	12.9609	50.128	58.7206	49.3917	94.5315	36.7444	202.437	406.535	39.8976
Macma4_01_g15180	32.1232	35.9672	48.0965	31.3221	25.7401	31.1616	45.3397	35.7581	36.435	26.5686	39.7059	23.4655	27.187	30.4498	28.9086	46.5068	41.2189	31.5319
Macma4_01_g15190	23.97	4.19193	2.55223	7.84035	7.43209	12.6865	9.63717	8.52695	20.6614	25.629	1.71552	12.0339	13.4807	11.6731	16.7553	28.6942	16.7634	18.2321
Macma4_01_g15200	98.7047	87.1526	68.2553	93.568	90.6968	88.1183	88.3895	85.1137	84.7871	136.277	96.6179	103.764	105.483	118.916	129.683	108.466	78.1294	89.2803
Macma4_01_g15210	0.135093	0.990644	0.117279	0.165969	0.0184846	0.166368	0	0.334684	0	0.10748	0.0718233	0	0	0.0180782	0.0327036	0.118164	0.0186162	0.21966
Macma4_01_g15220	1.27764	1.4574	1.89126	1.50257	1.41199	1.78859	0.293529	1.63261	1.24742	1.29537	2.96265	0.590747	1.13314	1.67555	0.932637	0.802331	0.70154	0.950822
Macma4_01_g15230	23.1722	17.1625	30.2558	22.0378	28.377	24.0122	32.8785	18.3477	19.455	33.8334	27.2986	20.8813	25.0645	24.3911	31.7513	25.4012	23.8137	25.1759
Macma4_01_g15240	43.5152	56.0337	51.5856	41.5645	12.0203	42.1706	24.544	62.3163	40.2897	28.2514	44.326	24.9452	34.5123	28.4796	23.795	38.9596	43.9002	53.1613
Macma4_01_g15250	53.2565	36.0181	51.4918	37.5132	9.67342	48.0414	33.44	35.7079	41.6646	51.2525	46.6653	28.4553	33.2474	33.9348	38.5753	43.4587	31.8438	45.1724
Macma4_01_g15260	4.75045	4.90836	4.44528	4.2679	1.82989	6.28121	2.69881	7.16371	5.58026	3.95405	5.35665	3.83403	3.32555	2.37009	2.12188	3.97827	4.35825	6.46482
Macma4_01_g15270	48.2574	78.7259	85.6039	60.159	54.2363	55.0666	63.363	60.9267	46.6938	44.6112	78.4302	76.8817	54.7251	53.1223	48.2619	54.0274	61.161	57.9425
Macma4_01_g15280	9.80809	9.30684	17.3622	9.7716	5.42295	8.30995	8.26717	7.96638	10.9438	7.40598	14.1015	9.48606	9.384	9.00818	9.68303	11.1644	19.5944	8.70807
Macma4_01_g15290	44.8455	66.4694	137.804	54.8511	51.8932	50.6737	132.54	60.6386	35.5125	35.1318	102.317	52.2601	39.422	55.1158	34.2754	60.1322	95.8803	45.8452
Macma4_01_g15300	6.00457	3.15375	1.5618	4.13021	5.12461	6.9375	6.18335	3.73193	6.72609	7.56859	2.47813	3.86206	5.55601	7.00358	7.04741	6.07979	2.92987	5.5845
Macma4_01_g15310	9.37497	7.74171	8.22208	8.53282	5.44281	10.284	7.2998	8.294	6.98481	10.0873	8.43013	3.68055	7.83134	8.63478	8.47582	6.57388	7.2498	9.96017
Macma4_01_g15320	2.10277	0.333142	0	8.59529	11.301	11.0776	14.15	1.81265	12.0339	15.5059	0	0	12.6273	4.15838	16.8267	19.4315	5.52169	7.75625
Macma4_01_g15330	19.1252	8.47133	6.79485	15.3499	12.0431	17.0035	12.5083	11.3459	16.6694	22.8372	9.38284	12.771	18.1034	14.8067	20.1072	15.4732	9.12079	16.6341
Macma4_01_g15340	5.45316	1.02394	1.40918	2.70186	1.0962	4.01954	1.60112	1.86393	2.82769	6.76965	2.56814	0.852981	2.4459	3.32139	3.19435	2.67934	1.45035	3.76747
Macma4_01_g15350	0.851249	0.566428	0.890902	1.16588	0	1.03279	0.517896	1.34675	1.04391	0.474077	0.765605	0.150493	1.2524	1.56823	1.05784	1.15823	1.17696	1.04963
Macma4_01_g15360	3.49012	5.82611	5.00055	2.65713	2.66341	2.47326	3.86068	3.13378	2.81857	3.13418	5.70244	3.58675	2.19809	3.7478	3.38989	4.19859	4.26989	2.31456
Macma4_01_g15370	0.603626	0.382531	0.0555787	0.436964	0.175198	0.140164	0.182104	0.200347	0.807541	0.220718	0	0.582084	0.790872	0.788195	0.867907	0.447987	0.441114	0.242894
Macma4_01_g15380	3.62112	0.73461	0	1.03382	0.338373	1.48044	1.48378	0.705366	1.36064	4.9597	0	1.26865	3.54022	2.02697	3.61067	2.45598	0.511172	2.49219
Macma4_01_g15390	8.22067	8.07394	4.1784	7.73928	2.61491	9.82081	3.29681	7.00496	6.41705	6.05365	2.653	6.94491	5.49218	4.57494	3.95813	6.93403	5.15	3.97056
Macma4_01_g15400	0.420196	4.71328	4.68142	1.04394	0.68419	0.281736	0.592632	0.306824	0	0.390025	1.17285	0.66858	0.454196	0.0393617	0.0356027	0.0857593	0.851193	0.51812
Macma4_01_g15410	190.218	159.972	27.2353	218.029	23.1422	156.632	79.9755	147.31	183.942	99.9771	25.7114	123.937	136.305	113.121	90.5055	140.09	96.2908	138.257
Macma4_01_g15420	14.4564	8.39657	8.27629	8.26481	3.91922	12.8964	7.88721	11.9425	11.3131	12.1903	8.05875	11.6525	8.75107	8.60716	8.52219	8.25127	9.09965	8.32004
Macma4_01_g15430	0	0	0	0	0	0	0	0	0	0	0	0	0	0	0	0	0	0
Macma4_01_g15440	8.47736	13.6373	13.7719	6.57733	7.33312	5.6215	8.65609	7.60536	5.08696	4.50599	10.6738	9.8847	6.74413	6.49317	6.18004	3.74625	9.83157	7.19314
Macma4_01_g15450	15.0761	14.4229	31.0279	12.9201	16.4103	13.4321	19.9753	14.2983	12.3917	14.1819	18.8073	16.3829	13.5278	15.9409	13.543	12.0042	19.7878	12.0003
Macma4_01_g15460	1.6573	3.43086	3.30114	5.06759	2.55742	3.3865	2.53601	4.62208	2.70986	2.44419	2.50139	3.23921	3.4501	4.2434	1.74746	3.04419	4.13876	4.12197
Macma4_01_g15470	8.9144	5.33727	3.9888	6.94162	4.8171	4.53691	4.79062	6.7521	7.2445	8.94122	4.20889	6.16279	7.35862	7.15403	7.01195	7.52188	5.72412	6.78945
Macma4_01_g15480	0.203354	0	1.85365	0	0	0.584342	0	0.742438	0.187035	0.188753	0.189201	0.719021	0	1.14295	0.516898	0.207516	0.19616	0
Macma4_01_g15490	5.3789	5.67716	7.89068	5.45073	4.16188	7.42565	7.36868	5.13667	4.73597	4.99269	7.74725	5.63456	4.72442	5.2359	4.84941	3.96536	3.26826	5.28342
Macma4_01_g15500	0	0.142504	0.151835	0.107436	0	0	0	0	0	0	0	0	0	0.210645	0	0	0	0
Macma4_01_g15510	0	0	0	0.0684323	0	0	0	0	0.263475	0	0	0	0.193527	0	0	0	0	0
Macma4_01_g15520	311.828	403.925	249.805	372.27	226.165	301.09	251.827	433.005	520.592	252.201	217.278	324.005	364.075	321.225	347.841	401.981	305.29	430.687
Macma4_01_g15530	67.5126	50.1783	55.3351	53.989	42.3836	60.5251	50.0477	42.2446	67.9745	65.1518	52.5512	51.0382	63.4425	61.3729	60.9598	60.1837	40.3684	50.5414
Macma4_01_g15540	74.3008	30.3664	25.0845	59.0967	60.3291	54.9585	31.2746	43.9967	62.7854	80.1734	24.9893	27.4816	46.8878	48.1373	58.725	68.5451	41.7744	59.833
Macma4_01_g15550	1.18424	0	0.218077	0.102872	0.721806	0.412476	0	0	0.396074	0.199856	0.400661	0.190329	0	0.201696	0.182435	0.878893	0.519246	0.408453
Macma4_01_g15560	14.1694	15.1417	16.2468	19.3881	15.687	16.8888	14.8301	18.195	14.9777	11.6231	19.5746	18.0348	16.3714	15.0791	14.7016	15.7965	20.5473	15.0907
Macma4_01_g15570	2.12364	0.792147	0.898465	1.29717	1.82805	1.94399	0.724807	1.5703	1.22385	3.31854	1.60068	0.534646	1.2228	1.876	1.90183	1.30301	0.790881	1.19836
Macma4_01_g15580	0.830505	0.175436	0.280384	0.617233	0	0.220969	0.0382784	0.758035	0.678983	0.34261	0.042928	0.448633	0.91433	0.69153	0.390931	0.941671	0.356055	0.0437628
Macma4_01_g15590	5.93964	9.647	3.64533	6.7844	8.81607	6.29205	6.51044	9.58609	10.8536	4.70992	4.28193	13.9604	9.95635	10.5567	10.2318	9.05168	6.92473	8.65578
Macma4_01_g15600	4.50776	4.93273	13.6701	4.2072	4.79449	5.32183	8.45798	4.2101	5.1343	6.56806	16.3372	5.93064	5.45325	7.04589	5.12951	6.79307	18.8089	3.10726
Macma4_01_g15610	5.93088	0.717537	0.928343	0.772804	0.051642	4.44138	0.984088	0.63976	0.247951	4.65426	3.00988	0.857883	1.1656	0.555573	0.776616	0.165062	0.416077	1.17622
Macma4_01_g15620	0.607811	0	0.492483	0	0.232865	0	0	0.221909	0.894454	0.677003	0.113102	0	0.218998	0	0.720987	0.372151	0.234523	1.84482
Macma4_01_g15630	17.6608	15.3733	14.1886	16.5385	16.0338	15.9462	24.6321	19.3129	17.4996	16.1506	15.9178	21.43	20.3863	20.0795	18.838	15.0786	12.0777	13.4184
Macma4_01_g15640	1.55124	2.19893	2.23265	6.12414	3.29739	2.16358	2.63035	1.80089	2.32785	0.732558	3.27902	1.79221	2.1082	4.3211	1.83316	1.97179	3.1371	4.80122
Macma4_01_g15650	59.4878	41.0359	40.1257	45.1119	45.1599	54.6338	51.1564	44.4324	43.3656	70.7613	47.8559	32.2327	42.7738	54.205	67.6282	47.6458	34.0224	50.9355
Macma4_01_g15660	26.3187	27.5164	21.8792	24.1166	23.277	19.45	29.123	21.7546	23.5443	31.9481	22.5106	21.3549	23.5123	25.2947	30.5055	26.7104	18.2679	23.6313
Macma4_01_g15670	0	0	0	0	0	0	0	0	0	0	0	0	0	0	0	0	0	0
Macma4_01_g15680	0	0	0	0	0	0	0	0	0	0	0	0	0	0	0	0	0	0
Macma4_01_g15690	0	0	0	0	0	0	0	0	0	0	0	0	0	0	0	0	0	0
Macma4_01_g15700	142.979	130.419	144.488	131.02	126.536	132.981	131.537	137.993	120.346	148.745	145.367	107.231	123.994	126.201	129.697	130.498	115.619	129.046
Macma4_01_g15710	59.198	63.6706	52.7394	64.69	49.8446	63.8274	48.9569	58.3402	55.9135	64.5793	55.3107	46.7473	61.9948	60.343	54.0242	61.4623	54.6314	56.9791
Macma4_01_g15720	6.24416	11.2385	12.4898	9.14627	7.48054	8.7745	8.08719	8.18269	7.75944	5.34161	8.63243	11.1429	10.0853	11.6617	7.76177	8.32951	11.1591	8.83743
Macma4_01_g15730	1.14614	5.2296	1.65834	2.44071	0.595936	1.81924	0.652027	1.04613	2.92153	1.48938	1.91947	1.93943	2.53676	1.90188	1.94222	2.27237	1.3583	2.39164
Macma4_01_g15740	4.02904	2.02761	2.72047	2.26467	9.83674	2.2701	7.66836	4.32644	2.76112	6.08626	4.70417	1.74583	2.41948	3.55218	2.47665	3.06348	2.89583	2.54769
Macma4_01_g15750	3.76818	2.20923	0.617038	4.24749	3.43628	3.80382	4.32426	2.61557	2.94695	4.96369	1.49054	2.39345	3.94301	3.38187	4.05305	2.46376	1.87185	2.67522
Macma4_01_g15760	0	0.313938	0.167247	0.0394472	0	0	0	0	0	0	0.49932	0	0.0371857	0	0.0349781	0	0	0.0391562
Macma4_01_g15770	45.4751	68.6471	63.943	69.7313	119.908	75.5064	61.1464	93.9323	59.5514	40.1244	71.9891	77.6263	52.8491	64.0906	48.1296	53.5105	56.8094	69.9972
Macma4_01_g15780	0.0364418	0.173204	0.295272	0.0348218	0	0	0	0.0332619	0.0335173	0.101476	0	0	0	0	0	0.0371877	0	0
Macma4_01_g15790	0	0.0787808	0.251817	0.0395961	0.0396896	0	0	0.0756446	0	0.0384629	0.0385542	0	0.410586	0	0.0351101	0	0	0
Macma4_01_g15800	26.7178	39.0963	37.1898	32.1398	53.3617	39.6708	37.4214	45.9318	32.4468	29.9359	55.2944	58.6484	34.2694	32.8844	35.5317	24.9706	29.2757	36.4134
Macma4_01_g15810	0.247694	1.11841	3.40765	0.848115	0.652417	0.711754	0.530862	0.753602	0.36071	0.364024	1.09466	1.09475	0.371857	0.599402	0	0.56872	0.358397	0.371984
Macma4_01_g15820	0.0435183	0.0551569	0	0.0277225	0	0.0138945	0.0361041	0.0132403	0	0.0538582	0	0	0.104533	0.0407656	0.0122908	0.0740151	0.0279858	0
Macma4_01_g15830	3.73602	9.95719	10.0964	6.83961	11.0027	5.93632	6.69149	7.55303	3.16324	4.16457	12.2797	10.3858	7.02933	5.46216	4.30447	4.25788	5.67522	5.84529
Macma4_01_g15840	12.92	6.71568	4.37274	10.95	14.692	14.1502	13.9323	13.2197	14.635	16.4297	5.35188	11.2159	17.7697	15.4961	17.3199	12.7839	9.55198	12.047
Macma4_01_g15850	10.4541	5.51688	6.8201	7.74974	6.3249	9.10464	5.80259	5.55193	8.62282	11.7236	6.04012	4.62045	7.74109	8.18971	11.1745	8.27628	5.59836	9.26283
Macma4_01_g15860	33.0878	43.9056	55.2681	39.5557	41.6558	39.3508	30.3875	40.4433	27.8633	27.5381	63.7882	29.7164	21.8869	31.807	26.8923	37.7461	57.4464	26.3586
Macma4_01_g15870	4.38163	14.3464	23.9313	13.2428	6.93239	10.3213	12.4941	13.8938	1.19407	3.64526	20.3532	4.3035	5.29165	5.38142	1.925	5.69679	8.07753	9.23545
Macma4_01_g15880	12.9792	18.7421	19.7686	21.0175	1.80304	22.2542	21.4537	28.0792	15.9016	8.00085	15.7632	10.0279	9.05843	15.0353	5.70842	11.8799	18.6844	13.2974
Macma4_01_g15890	4.70619	2.33623	2.59511	4.89671	3.00507	3.35579	1.73529	4.43872	5.91564	3.20341	1.02169	4.43739	5.22831	5.19224	5.75972	5.6563	3.02646	4.26541
Macma4_01_g15900	17.013	7.67447	6.86112	19.0351	9.48079	13.2736	10.3934	14.1168	14.4528	17.8587	7.0223	5.76939	12.8727	13.7926	15.2536	14.6466	12.5023	15.638
Macma4_01_g15910	149.409	259.121	158.779	258.224	212.773	179.894	192.825	235.86	213.377	117.816	211.865	219.243	220.736	214.964	179.697	183.354	176.134	216.746
Macma4_01_g15920	0.997308	0.795117	0.814593	2.49003	1.66394	2.12623	0.934158	2.70149	2.01208	0.746533	1.40681	1.36502	2.05749	2.19995	1.71727	1.96978	2.76194	3.204
Macma4_01_g15930	2.98107	1.99323	6.14093	2.51058	1.20986	2.90378	3.10196	2.12141	2.11447	3.23601	3.38473	2.52347	1.77499	2.91083	2.97534	2.44914	3.16804	3.04319
Macma4_01_g15940	4.81166	0.266205	0.360989	3.94094	0.658375	4.19425	2.25997	1.55688	5.50264	5.62408	0	1.30524	4.08192	3.72032	4.83184	4.28664	1.35068	3.76698
Macma4_01_g15950	0	0	0	0	0	0	0	0	0	0	0	0	0	0	0	0	0	0
Macma4_01_g15960	0	0	0	0	0	0	0	0	0	0	0	0	0	0	0	0	0	0
Macma4_01_g15970	0.185806	0.158961	0.0188188	0.0532637	0	0.0177972	0	0.0169592	0.0683579	0.0344929	0	0	0.0836835	0.139242	0.0157431	0	0.0358464	0.0352472
Macma4_01_g15980	0.863996	0.794806	2.42763	1.51802	0.133474	2.40262	1.10988	1.78072	0.666489	0.931309	2.72277	0.862278	0.928887	1.38372	0.495907	0.796357	2.17767	0.925238
Macma4_01_g15990	30.3666	19.5391	20.0957	26.4218	21.2823	28.4977	21.2463	25.8171	24.3381	30.9643	20.655	21.1482	24.9784	25.7534	28.4499	26.882	24.5504	27.9565
Macma4_01_g16000	28.7517	24.5129	34.7701	33.611	6.77777	35.5846	25.0433	40.9208	25.3303	10.2222	20.4337	17.3708	14.3418	20.9911	9.92535	32.1864	34.1608	33.8467
Macma4_01_g16010	6.63523	6.71307	5.81641	6.54419	7.61886	9.25448	9.06198	6.71145	7.26263	9.54436	7.05794	9.1237	7.32242	7.88754	8.77814	6.77105	8.21583	6.91916
Macma4_01_g16020	16.3705	16.8404	20.9696	16.4505	27.5392	18.326	25.4245	19.0932	15.2867	20.8973	27.8702	22.7638	22.446	22.7181	21.2648	18.3457	17.4221	18.1811
Macma4_01_g16030	0.168293	0	0.127838	0.28142	0	0	0	0.0768039	0.851331	0.156209	0	0	0.0757961	0.0394119	0.356482	0.300541	0.162339	0.239438
Macma4_01_g16040	15.6963	13.4537	18.4718	14.2685	29.3145	16.4837	19.1473	15.7697	15.5707	18.1713	19.6924	23.4434	19.8623	18.6929	20.5931	16.8513	17.2133	15.835
Macma4_01_g16050	6.39165	4.42074	4.31573	3.69953	4.8054	5.11279	6.95624	4.43294	6.34227	7.6126	6.20259	4.83989	5.86054	6.67407	6.5608	6.35883	5.41417	4.54141
Macma4_01_g16060	12.0074	13.17	12.5511	12.6688	13.8598	12.2568	17.3851	12.5579	11.6101	13.3957	13.6066	15.2576	11.6825	12.041	11.3313	11.2713	10.0791	10.9692
Macma4_01_g16070	4.46041	12.1748	30.4293	25.5423	10.2838	8.57524	8.80189	9.1602	0.996313	1.77435	58.0405	6.05501	1.92279	11.1321	0.836835	1.65812	2.08984	0.997233
Macma4_01_g16080	0.45715	0.583938	0.651109	0.518732	0.328395	0.424192	0.545194	0.59981	0.670113	0.835391	0.132917	0.366214	0.347443	0.829701	0.435755	0.830966	0.950856	0.555556
Macma4_01_g16090	66.5266	32.2964	32.2995	42.3071	58.9943	40.3327	45.9966	34.3643	41.045	80.2384	46.5904	23.0992	42.3917	49.6537	62.2435	46.4244	29.2492	52.3126
Macma4_01_g16100	2.27378	4.19716	4.15063	2.02111	1.49409	2.86168	5.3521	1.90644	1.02134	1.76695	3.61608	3.03824	1.59564	1.80798	1.65773	1.83467	3.00946	2.4576
Macma4_01_g16110	9.3156	13.0011	6.60453	7.68764	1.70339	9.04453	8.15006	3.55568	2.06411	5.62037	5.98829	7.26138	3.8523	5.87045	3.80299	5.4445	10.6199	5.98425
Macma4_01_g16120	7.45181	8.47839	11.831	22.7912	12.0702	14.3855	12.7225	9.03375	10.8761	9.05322	16.8378	11.5973	12.8545	22.1003	10.4093	14.2692	11.2402	9.36034
Macma4_01_g16130	1.26705	0.291985	0	1.35748	0.992934	3.01569	0.0955623	0.665858	2.472	1.78193	0.250063	0.135759	2.17887	1.72641	1.46394	0.744447	0.592594	0.801195
Macma4_01_g16140	18.224	30.9267	37.428	23.0882	17.082	18.8916	18.3175	22.4805	15.0603	19.554	33.2048	25.4889	20.5544	22.5975	20.0106	18.9348	24.5847	18.1349
Macma4_01_g16150	7.80175	6.25638	5.6679	6.05363	6.31514	6.22548	3.48448	4.26188	6.06424	7.67716	5.8616	4.77043	6.03417	6.64887	7.48508	5.38745	2.88581	5.57498
Macma4_01_g16160	8.88535	2.93396	0.452595	6.06738	5.85278	7.3063	4.08669	6.14654	9.00386	6.25064	1.2763	8.59832	8.89289	8.34278	7.88066	8.19762	7.81916	6.69289
Macma4_01_g16170	0.535664	0	0	0	0	0	0	0	0	0.372902	0	0	0	0.250891	0.226931	0	0	0
Macma4_01_g16180	1.34463	3.51499	1.61722	2.46263	0.912254	3.03202	1.85924	3.40063	3.78745	2.18414	2.73666	3.31814	2.90181	3.14893	1.89881	2.34409	2.16176	3.4807
Macma4_01_g16190	0.145686	0	0	0.104408	0	0.331418	0.0906494	0	0.0334988	0.118323	0.203321	0.32195	0.0164036	0.324119	0.0617192	0.0371671	0.158099	0.0172729
Macma4_01_g16200	0	0	0	0	0	0	0	0	0	0	0	0	0	0	0	0	0	0
Macma4_01_g16210	0.156873	0.372802	0.317769	0	0	0	0	0.286369	0	0	0.218933	0	0.0706528	0.0734751	0.199375	0.160084	0.226985	0.0743967
Macma4_01_g16220	0	0	0	0	0	0	0	0	0	0	0	0	0	0	0	0	0	0
Macma4_01_g16230	34.87	31.2069	22.9157	39.5454	54.8752	32.295	35.1441	39.6597	38.8567	40.9903	32.1601	42.6329	44.3114	45.2741	44.5591	38.714	31.0809	40.2395
Macma4_01_g16240	12.1533	11.1848	12.7908	11.761	20.9719	15.9414	15.7618	13.1923	11.3204	13.0462	16.5754	17.8789	15.9976	14.2022	14.7199	10.935	11.67	13.3524
Macma4_01_g16250	0	0	0	0	0	0	0	0	0	0	0	0	0.515574	0	0	0	0	0
Macma4_01_g16260	0	0	0	0	0.0354133	0	0	0	0	0	0	0.0653656	0	0	0	0	0	0
Macma4_01_g16270	23.3408	12.3457	17.8376	14.6974	26.1542	20.4507	19.4112	15.3188	16.8498	24.3796	18.3297	12.507	19.3915	19.5758	19.9024	17.8639	13.4639	18.3168
Macma4_01_g16280	14.5379	13.2943	15.3772	12.8907	12.6235	15.8213	16.664	14.1834	14.3452	16.742	17.9384	19.1796	16.7449	17.0795	17.6916	15.1996	14.6232	14.9464
Macma4_01_g16290	6.72124	2.06669	3.90721	4.71233	4.5457	6.04423	4.20136	2.94032	4.91378	9.70866	3.33025	2.68353	5.493	4.55753	6.09919	5.80361	3.97703	4.03628
Macma4_01_g16300	320.052	287.026	490.94	90.5829	91.3638	94.2434	49.4428	90.6463	41.1051	438.04	487.881	268.787	66.7718	61.2879	66.3177	60.1226	89.0119	90.4967
Macma4_01_g16310	5.53331	2.71702	1.44746	4.23687	0.0350982	1.26358	0.577625	0.936512	2.08963	1.83672	2.69343	6.28404	2.67365	2.23122	2.70121	3.66466	0.565568	2.36348
Macma4_01_g16320	2.67734	2.71634	1.57312	2.80432	2.94245	2.81927	2.64836	2.25574	2.59666	3.02673	3.27344	4.85466	3.37013	4.39702	3.27185	2.58328	2.21841	2.58015
Macma4_01_g16330	1.10024	0.826969	0.492388	1.41808	1.56847	0.612708	0.254734	0.712308	1.45909	0.213749	0.976058	1.67371	1.44049	1.17446	1.08398	0.861656	0.703432	1.66244
Macma4_01_g16340	0.0697657	0.0530544	0.113056	0.0399986	0	0.0133649	0	0	0.0385002	0	0.012982	0	0	0.0130705	0.0118223	0	0.0134595	0
Macma4_01_g16350	0	0	0	0	0	0	0	0	0	0	0	0	0	0	0	0	0	0
Macma4_01_g16360	0.459675	0.364132	0	0.0732067	0.440278	0.366912	0.12712	0.489491	0.281857	0.426669	0	0.474052	1.17316	0.430598	0.259651	0.156361	0.295608	0.218
Macma4_01_g16370	0.231272	0.293123	0.299303	0.171881	0.0984501	0.0984538	0.0106594	0.105545	0.165443	0.0238518	0.215176	0.318007	0.185174	0.1685	0.0653179	0.0786685	0.0743632	0.0609333
Macma4_01_g16380	0.0279774	0.0531896	0.170016	0.0267336	0.0133984	0	0	0.012768	0.0257322	0	0.0650756	0.0123653	0.050402	0	0.0355573	0	0.0809627	0.0398046
Macma4_01_g16390	0.764347	0.944547	1.30315	0.52343	0.585675	1.01277	0.25365	0.546493	0.761592	0.543924	0.0829676	0.517996	0.539322	0.286399	0.280636	0.246997	0.221192	0.773312
Macma4_01_g16400	2.42117	2.05668	0.99132	4.35634	2.02296	3.35528	0.213689	0.822835	1.37403	1.76917	3.01953	4.43977	2.80733	0.965115	2.72796	1.10394	1.93798	1.78343
Macma4_01_g16410	14.6415	9.82152	12.0422	12.9984	11.8853	11.8112	16.7345	11.3972	12.6069	25.2045	13.7433	16.2927	19.8062	17.9467	26.6807	17.5903	12.3706	15.0693
Macma4_01_g16420	38.3245	20.8101	17.1594	32.8791	36.2848	37.6428	32.1204	28.6597	37.3674	43.4424	21.2256	31.3687	44.0036	40.661	40.839	36.0832	26.4075	38.1449
Macma4_01_g16430	18.7319	20.6611	16.2438	20.9465	8.24418	17.6752	14.5901	20.2342	15.9756	17.6168	18.2348	13.0823	14.4466	19.5772	13.8776	17.0932	12.8127	21.1443
Macma4_01_g16440	20.7664	19.38	21.1095	18.1052	24.1247	22.1655	24.6166	16.8214	19.3788	27.2013	26.1729	29.0869	26.3404	24.7066	30.9842	17.608	18.7036	18.9421
Macma4_01_g16450	17.7715	14.4135	21.6506	14.6965	11.6861	19.5816	23.566	16.2042	15.7288	17.5212	19.4927	14.348	16.6035	13.9237	16.2855	18.4772	19.5281	16.0915
Macma4_01_g16460	0.175347	0.145847	0	0.10472	0	0.188949	0	0.160046	0.141116	0.223791	0.203929	0.0387497	0.0987165	0.20532	0.0185712	0.0447341	0.105715	0.0623685
Macma4_01_g16470	4.47645	2.84063	4.92281	2.49996	2.62082	5.39127	3.70385	2.84804	2.11932	4.05478	5.4155	1.69736	2.79986	3.15903	2.4201	2.98824	2.45425	4.16622
Macma4_01_g16480	15.5468	14.0268	20.3798	11.5364	14.9178	17.5558	21.9654	12.94	11.364	20.63	21.3227	16.4138	13.5969	13.6242	13.8426	16.3693	14.738	13.5674
Macma4_01_g16490	4.90804	4.66549	5.04628	3.69504	1.06839	5.76955	5.61423	4.54764	3.00944	5.86711	5.11996	3.15525	3.41621	4.52792	3.46544	5.38793	3.51493	2.75083
Macma4_01_g16500	7.20273	17.89	10.4047	16.35	7.78896	12.7331	8.78441	11.2852	12.1046	12.7549	20.0271	7.45247	11.5408	18.609	11.7697	11.3809	7.26809	16.3868
Macma4_01_g16510	14.5932	16.8481	14.4984	15.6896	21.4575	15.5107	18.3264	15.3678	15.3418	16.2092	17.4129	19.0497	17.8766	18.0204	18.7164	16.3118	11.3924	14.7489
Macma4_01_g16520	49.5929	78.1531	88.9633	54.4931	55.5078	54.8966	54.2189	60.3647	40.4759	42.7299	72.1911	52.2343	39.2237	45.7894	35.599	40.6244	38.7443	47.4098
Macma4_01_g16530	211.251	110.83	145.162	146.815	146.76	170.992	134.439	121.014	164.551	203.185	133.657	76.7526	124.399	150.447	164.806	176.753	111.28	137.252
Macma4_01_g16540	2.31471	9.46926	5.19116	1.81685	1.70237	2.69222	2.05753	1.43364	1.14051	3.22277	4.07649	2.30186	1.97331	2.24574	0.840527	1.56067	1.07654	1.80344
Macma4_01_g16550	0.399313	0.56937	0	0.190781	0	0.0956195	1.98769	0.546704	0.275451	0.555963	0.278642	0.176487	0.269765	0.0935138	0.0845834	0	0.0962966	0.189373
Macma4_01_g16560	0.250384	0	0	0.307611	0	0.205566	0.0890254	0.326479	0.0328986	0	0	0.0316182	0	0.0670131	0	0.109504	0	0.441049
Macma4_01_g16570	46.7464	31.8985	10.8112	57.0957	10.9878	36.2553	15.3704	38.6918	45.5341	24.2004	20.1483	33.8382	51.9989	48.3294	37.7365	49.0805	25.5643	41.3712
Macma4_01_g16580	3.10305	2.46482	3.09978	2.39646	1.09927	3.66439	2.53912	3.41426	2.77584	3.31426	2.84754	1.39026	3.52261	2.50858	2.91731	3.47021	1.23011	3.14482
Macma4_01_g16590	8.21618	9.79072	7.16686	8.621	2.08974	10.3738	9.62123	8.37834	7.52067	8.75742	6.89456	8.04459	8.00282	8.93012	7.51106	7.04045	5.23311	8.65062
Macma4_01_g16600	0.254192	1.30481	1.18428	0.388628	0	0.0973903	0.379595	0.371219	0	0	0.331102	0	0.503728	0.619096	0.430749	0.103758	0.0980798	0.19288
Macma4_01_g16610	1.86792	1.12994	0.659289	2.46098	0.542152	2.27712	1.80797	1.13662	1.53581	1.36603	0.579307	0.80056	2.16693	1.90884	0.935213	1.18413	1.17392	1.87909
Macma4_01_g16620	0.230143	0.156264	0	0.345576	0	0.692812	0.65463	0.0900261	0.453587	0.457754	0.244715	0.406871	0.296149	0.831545	0.222854	0.0335506	0.57086	0.0623685
Macma4_01_g16630	113.095	108.482	75.2808	122.459	131.619	111.129	99.766	133.928	143.027	126.194	92.3576	134.035	140.652	124.159	133.324	124.679	97.9818	122.285
Macma4_01_g16640	1.27797	0.87737	0.719089	1.05156	0.918036	2.14217	2.26775	1.13406	1.50192	0.955562	1.35417	1.25519	2.04649	2.09499	2.58672	1.88375	1.74641	2.39064
Macma4_01_g16650	2.39588	0.0632633	0.202217	0.763124	0	2.29487	1.32513	1.45788	2.50967	0.679511	0	0.058829	1.31885	1.87028	1.63528	3.12407	1.73334	1.83061
Macma4_01_g16660	0	0	0	0	0	0	0	0	0	0	0	0	0	0	0	0	0	0
Macma4_01_g16670	0.419127	0.478097	0.0566001	2.91026	0.107051	2.11434	1.13589	1.09665	0.591087	0.0259355	0.0519942	0.246992	0.528547	0.549661	0.568194	1.93893	0.269532	1.0336
Macma4_01_g16680	8.26926	9.83938	2.35978	15.0734	12.9323	12.2011	12.3583	9.62199	13.929	10.9372	6.27227	17.0839	17.3744	16.53	15.8252	10.6017	7.93986	10.5605
Macma4_01_g16690	59.276	35.6443	34.2585	54.237	58.7446	54.1034	62.5988	48.0362	54.8737	75.4223	43.4644	41.3756	59.001	55.4577	72.9241	60.1145	42.5122	57.3203
Macma4_01_g16700	5.50504	7.38128	10.1829	5.37106	8.21439	3.91308	5.24021	5.15691	3.33109	6.37377	10.3786	8.27254	6.15928	6.02535	5.49903	5.70643	5.42208	4.83677
Macma4_01_g16710	1.17524	4.43372	5.17039	1.36865	0.351764	2.70869	2.10237	1.84368	0.405346	0.477248	2.90446	0.422034	1.38943	0.997689	0.529	0.861991	0.814817	1.56756
Macma4_01_g16720	0	0	0	0	0	0	0	0	0	0	0	0	0	0	0	0	0	0
Macma4_01_g16730	0	0	0	0	0	0	0	0	0	0	0	0	0	0	0	0	0	0
Macma4_01_g16740	0.107237	0.163101	0.043445	0.143458	0.041085	0.12326	0.0533805	0.019576	0.118358	0.139353	0.0798193	0.227503	0.598893	0.120545	0.654199	0.240751	0.0206887	0.305143
Macma4_01_g16750	0	0.224264	0	0	0	0.0205433	0	0.019576	0	0	0	0.0189586	0	0	0.0726888	0	0.0827549	0
Macma4_01_g16760	0.128685	0.407752	0.152057	0.0819762	0	0.246519	0	0.117456	0.177537	0.457873	0.0798193	0.227503	0.579574	0.341544	0.363444	0.415843	0.227576	0.244114
Macma4_01_g16770	88.8481	117.462	56.4964	92.8715	57.8378	86.7747	45.9829	67.8944	56.7905	42.5395	85.7412	107.316	69.133	67.9431	52.696	80.9378	69.3241	82.015
Macma4_01_g16780	2.64287	3.21634	5.43877	2.23585	0.999643	2.12835	0.865871	0.814329	0.387067	0.843746	2.19268	1.56241	0.515545	1.60842	0.584779	0.429454	0.844379	0.399165
Macma4_01_g16790	9.3409	12.4997	7.17997	10.9446	13.074	10.2519	16.3062	11.4439	10.9437	10.9152	19.425	24.3776	16.0015	15.8595	13.9916	12.0286	12.7111	10.8902
Macma4_01_g16800	0	0	0	0	0	0	0	0	0	0	0	0	0	0	0	0	0	0
Macma4_01_g16810	0.660825	0.232655	0.396621	0.116935	0.187538	0.550913	0.385799	0.156375	0.24762	0.499789	0.56929	0.173078	0.209439	0.492927	0.15553	0.112392	0.0826319	0.162501
Macma4_01_g16820	68.6756	24.1171	24.1857	45.1549	86.8317	44.0018	52.0105	36.9805	51.9778	89.7745	32.4885	27.4255	60.1334	57.2017	82.1786	54.6065	34.4307	52.39
Macma4_01_g16830	17.8473	30.8236	18.5524	20.6264	12.1844	20.3381	10.0857	18.1571	19.0103	14.4705	14.7237	24.7139	23.5318	24.6039	18.2298	16.6529	12.7474	16.2366
Macma4_01_g16840	1.43979	0.916608	1.59203	1.45151	1.84714	2.39125	1.18353	1.18153	0.777537	2.0843	0.700515	0.572132	1.60626	1.38583	0.794622	1.02444	1.29966	1.4408
Macma4_01_g16850	94.7793	191.861	123.562	137.626	206.007	147.657	147.027	187.562	164.576	108.519	260.03	219.992	166.317	176.213	149.912	135.609	144.715	202.887
Macma4_01_g16860	1.62016	1.5401	1.82326	2.06419	1.03453	1.89672	2.68828	1.31448	2.15243	1.00256	4.18724	3.97819	2.43231	1.18042	1.98286	2.75555	1.3892	3.58568
Macma4_01_g16870	24.1679	16.6384	6.70197	26.765	3.97539	21.0363	13.4982	25.2629	37.3455	16.0485	9.268	22.1181	18.8214	17.196	18.4476	30.0598	22.4893	30.1218
Macma4_01_g16880	3.76724	11.3528	8.63234	7.5825	0.460631	4.60649	5.0982	8.12075	7.54419	2.18237	4.7977	5.83352	4.76519	5.30594	3.68997	4.77136	4.61333	9.80733
Macma4_01_g16890	16.0021	9.80851	7.05362	14.1369	17.1259	13.7036	12.1628	10.6983	13.9327	20.7853	12.0741	10.6735	13.8977	15.0813	16.0282	12.882	11.0005	13.3964
Macma4_01_g16900	2.55829	1.30424	1.59229	1.6115	0.971922	2.43674	1.82601	1.83934	2.3267	2.60012	2.03451	1.12439	2.04694	2.14209	2.89418	1.41471	1.66817	1.27427
Macma4_01_g16910	48.1885	31.2653	27.053	45.7042	68.4309	42.1936	46.0929	42.1385	48.4852	59.094	31.8848	41.5261	49.9027	47.2213	53.0864	44.4368	37.9933	50.3201
Macma4_01_g16920	45.2725	34.1236	30.1874	35.4059	49.8514	37.9307	52.0691	34.8265	38.5719	61.875	40.7534	41.7481	48.1717	47.9928	59.8634	43.6266	32.7531	40.4002
Macma4_01_g16930	6.27823	7.25627	7.81349	7.36056	6.53476	8.09942	4.16112	8.19383	5.20975	4.84904	7.59799	5.80564	5.50913	6.33684	4.14173	4.58638	4.93875	7.17442
Macma4_01_g16940	0.289972	0.179767	0.102153	0.337317	0.434718	0.579645	0.219651	0.356728	0.313085	0.596815	0.304981	0.445777	0.408829	0.38973	0.405922	0.681874	0.316198	0.5142
Macma4_01_g16950	11.6064	11.5405	10.5282	9.45984	8.87084	11.5912	7.66214	7.33587	9.50083	12.768	10.4108	6.50574	10.7831	9.6642	10.0657	8.90622	8.07955	9.29121
Macma4_01_g16960	15.7764	46.7189	16.8454	20.1853	12.2935	16.9554	17.348	31.9236	26.7581	9.82863	26.9685	28.5058	28.6625	19.4375	25.7375	25.7044	22.6985	29.0654
Macma4_01_g16970	228.087	403.205	320.865	320.99	522.785	354.303	410.959	408.777	303.327	228.94	455.393	491.567	484.135	370.217	371.151	284.659	308.817	443.429
Macma4_01_g16980	0.173909	0.236164	0.125813	0.237397	0.0237958	0.21417	0.453452	0.136058	0.137102	0.230603	0.0924603	0.0658832	0.290923	0.0930906	0.336803	0.430996	0.0479304	0.424162
Macma4_01_g16990	69.2362	27.7115	18.8638	56.6971	38.5337	46.1858	33.1634	40.1812	51.0523	74.9246	31.0958	21.5393	45.423	44.5826	59.7234	57.8449	38.9501	55.1965
Macma4_01_g17000	0	0	0	0	0	0	0	0	0	0	0	0	0	0	0	0	0	0
Macma4_01_g17010	702.042	1399.56	885.712	977.539	714.238	778.572	772.963	1336.73	1000.35	404.946	950.255	843.477	919.44	823.645	717.301	800.663	816.31	1068.16
Macma4_01_g17020	0.0279418	0.584341	1.2735	0.0266996	0.160576	0	0	0.0255036	0	0	0	0	0	0	0	0.313651	0.512112	0
Macma4_01_g17030	35.0502	47.9289	58.4385	35.917	34.9929	23.9869	18.4721	26.1353	9.60075	20.9779	41.4763	37.2047	17.2524	22.2476	11.1975	30.0507	46.235	11.3996
Macma4_01_g17040	5.75982	10.296	4.42505	6.79245	9.82255	7.62958	6.46848	9.64251	8.3857	3.35119	13.1229	10.7913	10.3259	8.51434	8.97485	5.87771	6.1252	12.4453
Macma4_01_g17050	15.4796	15.2749	22.6815	12.4451	12.2488	15.1281	16.3137	13.0889	10.4612	16.301	17.8384	12.9366	12.3333	11.8507	13.3654	11.5066	10.7821	12.3719
Macma4_01_g17060	42.5151	40.1922	37.4905	39.5097	56.125	40.3748	46.8713	44.6059	40.8449	58.7001	49.4271	57.2318	48.3198	48.136	55.0778	41.2941	38.5588	39.7595
Macma4_01_g17070	11.7163	14.164	10.0097	12.6442	9.57159	10.1397	6.28952	6.60505	6.94736	7.45898	8.20769	16.9361	11.3109	9.18039	8.25696	7.21584	11.4214	8.94255
Macma4_01_g17080	11.873	19.8878	24.4268	13.9018	3.68388	15.9463	17.6194	18.9265	17.4483	16.5049	24.8593	19.1179	15.2973	13.8372	14.342	12.4004	16.5969	15.4911
Macma4_01_g17090	0.0321791	0	0.488875	0.0307486	0.0616425	0.0462336	0	0.0440567	0.0295967	0.0448029	0.112273	0.0782232	0.0724644	0.0301436	0	0.00820944	0.116402	0.0686739
Macma4_01_g17100	19.0538	57.2069	47.7075	16.3762	22.2389	20.7438	30.2505	34.4213	14.3071	29.4956	56.3994	27.4269	21.8336	12.3087	17.0792	17.4038	12.3938	32.4119
Macma4_01_g17110	7.33328	6.86364	5.52287	5.82143	1.80098	7.31227	2.18397	8.71856	9.44269	5.4803	6.61297	2.55967	3.15034	2.95913	2.67654	5.25756	4.71589	5.60014
Macma4_01_g17120	2.44025	19.0083	16.9575	19.1075	0.194773	9.60917	3.59912	9.58982	1.93269	0.755012	4.85616	2.99592	3.41925	4.69878	0.91893	4.56536	23.0161	1.80022
Macma4_01_g17130	16.0141	1.39179	0.185365	5.24648	0.525887	2.80484	5.2384	4.51031	11.0257	2.37829	1.53253	3.31649	3.2147	5.3147	4.65208	15.0346	7.06175	5.55495
Macma4_01_g17140	16.6242	8.01006	2.93495	11.8774	1.24168	8.07122	6.89597	11.6238	22.0233	7.99841	1.09973	8.29122	6.38819	5.8576	6.07355	15.4081	8.60651	11.0303
Macma4_01_g17150	0.855671	1.84367	0.808866	3.18877	1.99427	2.24023	1.39612	4.0352	4.19735	0.767759	1.03496	2.79858	1.07906	1.33591	2.22333	2.3576	2.83387	5.05898
Macma4_01_g17160	0	0	0	0	0	0	0	0	0	0	0	0	0	0	0	0	0	0
Macma4_01_g17170	5.5912	4.40073	4.25849	4.82975	4.09143	5.1841	8.12688	5.28703	4.97794	6.8297	5.86793	5.89129	6.48682	7.563	6.49965	5.20355	4.65989	5.72749
Macma4_01_g17180	3.49618	0.788023	0.876124	1.75648	0.517832	1.27737	0.448536	1.41461	3.97807	3.5797	0.503019	1.5293	2.3051	1.68816	1.12994	2.79534	1.00827	3.17936
Macma4_01_g17190	4.87458	7.84343	11.7769	4.00085	5.49212	4.4809	5.13408	5.09924	3.25244	3.44187	6.36317	6.32768	3.67194	3.61159	3.68283	3.78402	7.02358	3.87817
Macma4_01_g17200	17.3823	4.30575	5.04644	12.3084	15.1394	11.9312	12.2758	5.85698	13.8956	27.7138	4.46896	5.41367	16.3714	14.6828	20.9164	13.2891	8.4565	13.0769
Macma4_01_g17210	1.34768	2.05606	5.98224	0.922108	1.1952	1.25899	0.772992	1.26046	0.459085	0.416972	1.03717	1.92665	0.554517	0.950723	0.394722	0.882888	3.17779	0.536558
Macma4_01_g17220	9.98103	13.6811	3.14402	5.96083	12.3055	6.67224	9.70995	4.46015	2.93707	6.19004	5.51379	11.7112	6.20776	6.08008	7.78983	3.98622	6.13207	4.28267
Macma4_01_g17230	1.38709	2.24928	2.76843	1.3839	0.644741	1.48491	1.01539	1.71289	1.63224	1.21176	1.95481	0.973684	0.661467	2.02546	1.22711	1.47793	1.33802	1.81869
Macma4_01_g17240	0	1.95999	3.9868	3.13445	0.35907	1.79542	0.0388774	0.940984	1.81022	1.08741	2.70318	1.9883	2.70149	8.5599	2.18377	1.05205	1.22049	2.48906
Macma4_01_g17250	7.25757	5.3093	12.9398	11.505	3.33151	8.32909	5.79913	3.81583	1.99947	4.37715	6.31682	4.19806	3.28374	2.94497	2.86209	4.47098	12.1627	3.26741
Macma4_01_g17260	2.24303	1.96532	5.17574	1.41646	2.20443	1.49459	1.34308	0.783318	0.968727	2.84236	3.42982	1.4655	0.808177	1.60784	2.21449	1.63212	2.82219	1.2765
Macma4_01_g17270	10.6145	33.877	48.851	3.20569	5.1623	5.21518	8.76046	8.83488	6.67705	5.56427	7.36842	2.43075	4.5081	15.0434	1.72414	99.506	414.969	0.78247
Macma4_01_g17280	7.15652	8.13386	7.1301	9.3842	12.1072	7.65577	5.14671	8.21831	5.58057	7.97843	10.4038	8.64672	8.84619	8.81701	8.50228	6.13215	6.07794	6.58503
Macma4_01_g17290	0	0	0	0	0	0.177671	0	0	0	0	0	0	0	0	0	0	0	0
Macma4_01_g17300	0	0	0	0	0	0	0	0	0	0	0	0	0	0	0	0	0	0
Macma4_01_g17310	0	0	0	0	0	0	0	0	0	0	0	0	0	0	0	0	0	0
Macma4_01_g17320	0	0	0	0	0	0	0	0	0	0	0	0	0	0	0	0	0	0
Macma4_01_g17330	0	0.0840117	0	0.0527815	0	0.0529082	0.0274958	0.0201668	0.0711259	0	0.0925068	0	0.0398044	0.113835	0.0655223	0.0789147	0.0319697	0.146698
Macma4_01_g17340	0	0	0	0	0	0	0	0	0	0	0	0	0	0	0	0	0	0
Macma4_01_g17350	0	0	0	0	0	0	0	0	0	0	0	0	0	0	0	0	0	0
Macma4_01_g17360	0	0	0	0	0	0	0	0	0	0	0	0	0	0	0	0	0	0
Macma4_01_g17370	0	0	0	0	0	0	0	0	0	0	0	0	0	0	0	0	0	0
Macma4_01_g17380	0	0	0	0	0	0	0	0	0	0	0	0	0	0	0	0	0	0
Macma4_01_g17390	0	0	0	0	0	0	0	0	0	0	0	0	0	0	0	0	0	0
Macma4_01_g17400	0	0	0	0	0	0	0	0	0	0	0	0	0	0	0	0	0	0
Macma4_01_g17410	0	0	0	0	0	0	0	0	0	0	0	0	0	0	0	0	0	0
Macma4_01_g17420	0	0	0	0	0	0	0	0	0	0	0	0	0	0	0	0	0	0
Macma4_01_g17430	0	0	0.153936	0	0	0	0	0	0	0	0	0	0	0	0	0	0.0366527	0
Macma4_01_g17440	0	0	0	0	0	0	0	0	0	0	0	0	0	0	0	0	0	0
Macma4_01_g17450	0	0	0	0	0	0	0	0	0	0	0	0	0	0	0	0	0	0
Macma4_01_g17460	0	0	0	0	0	0	0	0	0	0	0	0	0	0	0	0	0	0
Macma4_01_g17470	0	0	0	0	0	0	0	0	0	0	0	0	0	0	0	0	0.0366527	0
Macma4_01_g17480	0	0	0	0	0	0	0	0	0	0	0	0	0	0	0	0	0	0
Macma4_01_g17490	0	0	0	0	0	0	0	0	0	0	0	0	0	0	0	0	0	0
Macma4_01_g17500	0	0	0	0	0	0	0	0	0	0	0	0	0	0	0	0	0	0
Macma4_01_g17510	0	0	0	0	0	0	0	0	0	0	0	0	0	0	0	0	0	0
Macma4_01_g17520	3.09468	3.16949	4.24655	2.6137	1.30038	3.05982	2.23616	2.0957	1.59762	2.55743	2.84215	2.40022	1.90634	2.31914	2.1315	1.5892	3.10075	1.89373
Macma4_01_g17530	2.87097	5.38272	3.65817	3.16053	3.32006	4.80287	4.50025	4.15407	2.12949	2.3701	6.51171	4.25695	3.19385	3.1851	2.47738	1.72814	2.37377	3.71446
Macma4_01_g17540	54.2444	49.1372	44.4585	49.4597	90.4637	50.2723	60.0848	59.1299	47.0517	59.9232	53.0849	55.6336	56.1945	54.2708	60.3407	50.2153	43.7071	48.555
Macma4_01_g17550	4.42151	3.69983	1.73451	4.46298	4.62264	3.42983	2.91907	4.37673	4.20987	4.07514	2.75218	2.44963	3.33764	3.73348	4.45861	4.51201	2.61311	3.60311
Macma4_01_g17560	286.774	224.178	94.3332	323.543	119.122	172.663	175.232	289.834	323.636	174.449	107.234	129.937	212.72	251.384	182.059	261.481	193.568	191.21
Macma4_01_g17570	73.8817	66.6596	26.3901	105.804	15.8228	56.881	48.708	101.944	103.878	17.7924	26.528	23.5006	52.4938	75.3442	32.5238	80.8495	78.8872	43.7635
Macma4_01_g17580	67.1928	76.564	42.2829	95.7771	59.5388	59.4021	68.628	80.8014	71.322	30.2637	41.5876	41.3501	44.8381	75.7667	41.3974	59.7812	78.4414	39.5515
Macma4_01_g17590	12.5298	17.1494	30.0867	13.0827	7.19594	13.99	8.54985	12.6546	4.81885	6.65237	18.188	8.32323	6.01052	7.96375	5.27678	9.50777	11.5621	6.7744
Macma4_01_g17600	4.69278	5.70992	4.42025	5.47069	0.988848	4.13534	2.99782	6.25361	3.79824	2.43927	4.36618	3.02819	3.42394	5.27514	2.54473	3.59163	5.52265	2.4481
Macma4_01_g17610	23.1264	20.0544	9.13017	30.6671	14.2849	21.835	27.2917	31.878	30.8205	14.2376	18.1357	18.0229	27.4635	31.7438	17.9552	22.8773	23.4464	18.0854
Macma4_01_g17620	294.797	319.775	104.36	401.691	159.481	269.904	275.154	399.945	327.022	126.084	140.201	193.067	299.138	422.88	231.047	262.771	280.261	171.604
Macma4_01_g17630	0.0993766	0.0944656	0.855532	0.142438	0	0	0	0.090705	0	0.0461206	0.184921	0	0	0.0465453	0.378903	0	0.0479304	0.0471291
Macma4_01_g17640	37.7764	31.7138	34.9391	31.9501	30.1834	34.4359	31.9132	26.7603	28.9615	40.6028	41.4792	35.3106	33.6055	34.1857	39.0692	30.12	21.5262	32.7201
Macma4_01_g17650	1.02948	0.74374	0.604754	0.668926	0.315532	1.12413	0.58078	0.714132	0.757491	0.802672	0.363976	0.218403	0.945864	0.597904	0.697813	0.336177	0.377362	0.546816
Macma4_01_g17660	81.4785	98.5631	70.5457	94.3357	25.3505	75.8183	45.1133	70.9635	71.7998	69.6825	70.5029	58.3652	63.6283	82.5888	56.3916	83.7927	70.0403	79.0513
Macma4_01_g17670	14.1503	7.67533	6.86942	12.2868	12.6058	10.0541	10.1988	9.47017	12.7177	22.2402	5.18356	9.47482	11.8369	12.8581	15.5126	12.8332	9.15172	13.8619
Macma4_01_g17680	8.07668	7.42464	9.99913	9.31564	10.9212	10.1571	8.11962	8.49071	8.38986	11.1746	10.3613	12.5402	11.0326	10.1115	10.3374	8.04807	7.91926	7.96712
Macma4_01_g17690	17.1381	11.7749	15.7697	13.8891	15.0933	16.4906	16.2996	12.2508	13.3976	23.1554	12.9984	11.8089	16.9345	16.7737	19.277	14.9607	12.1606	17.4452
Macma4_01_g17700	9.25084	1.58256	0.73174	4.90755	4.18955	8.13871	9.75961	5.40449	10.5958	11.9615	0.489533	7.24712	7.37079	6.30432	8.66984	9.5043	8.97659	6.83031
Macma4_01_g17710	0	0	0	0	0	0	0	0	0.171184	0	0	0	0	0	0	0	0	0
Macma4_01_g17720	1.25825	0.462119	0.593748	1.25697	1.20516	1.02716	1.35231	0.443722	0.670695	1.89785	0.345883	0.151669	1.08187	0.589332	1.16302	0.963006	1.03444	0.990019
Macma4_01_g17730	1.02899	1.17081	1.37379	0.491625	0	0.0149335	0	0	0.0143396	0.723568	11.5466	3.14219	0.0561745	0.0584184	0.0528396	0.0159099	0.0601569	0.0147878
Macma4_01_g17740	0	0	0	0	0	0	0	0	0	0	0	0	0	0.205047	0	0	0	0
Macma4_01_g17750	35.0823	28.8155	25.7479	31.8474	32.9974	33.3009	28.509	28.9165	34.1859	42.4739	28.6605	43.4713	43.5242	37.8395	42.3961	31.417	24.3873	32.5437
Macma4_01_g17760	0.147445	0.760859	0.618674	0	0.221922	0.22193	0.192224	0.595991	0.464956	0.703841	0.0783903	0.633051	0.455358	0	0.0713875	0.343915	0.060955	0.059936
Macma4_01_g17770	14.3563	3.82766	2.76235	8.47508	6.09879	10.0588	7.21576	4.42014	8.24648	17.6611	5.28493	1.86036	7.67002	9.29407	12.4369	8.8208	4.93033	8.98289
Macma4_01_g17780	20.7079	68.7972	16.2035	85.9658	32.8357	77.3493	43.0743	66.4799	64.5911	19.2853	42.3137	72.2805	55.3973	91.1297	47.6879	51.4277	66.8293	87.1708
Macma4_01_g17790	6.79003	5.67352	7.11367	5.53382	5.8632	9.2966	8.64028	6.46955	6.48219	7.74542	7.92869	5.95935	8.27829	9.13714	8.49659	6.64956	5.92824	6.95218
Macma4_01_g17800	23.4546	12.6442	18.5772	13.9523	22.3543	19.3947	19.231	12.1013	14.8377	27.8969	17.6029	13.0091	14.2582	16.3294	23.6908	16.2709	12.9703	16.5343
Macma4_01_g17810	0	0	0	0	0	0	0	0	0	0	0	0	0	0	0	0	0	0
Macma4_01_g17820	18.9322	18.0375	54.8478	13.6758	13.9756	18.7927	34.7117	24.2825	11.5032	16.1966	28.8711	28.9114	7.99441	9.9443	9.12209	25.0214	38.5978	17.8756
Macma4_01_g17830	5.468	6.17558	15.8741	6.78981	6.17064	6.75426	10.0834	5.39853	1.15771	2.34925	10.4519	7.03483	3.66965	3.10624	3.06189	4.75122	4.85677	3.96681
Macma4_01_g17840	2.43884	5.07131	1.6789	2.51248	2.64617	1.93451	4.69477	3.75642	4.62643	2.59975	6.00957	8.0001	6.41882	3.17698	6.48978	5.58026	4.09859	4.69874
Macma4_01_g17850	0.647902	2.27404	2.70055	6.40531	1.67075	5.32272	2.50153	2.8886	0.206276	1.6885	4.96159	1.05732	1.03254	3.15131	1.43574	0.762882	2.21147	2.48177
Macma4_01_g17860	22.3227	45.4084	74.4219	43.0739	45.2701	32.406	56.994	46.2984	45.6594	22.1919	47.3732	58.8567	46.7298	43.8021	47.0502	48.2564	45.8705	40.1807
Macma4_01_g17870	115.686	180.909	205.241	140.444	128.04	118.254	120	132.697	87.023	111.476	220.833	167.197	128.443	135.494	111.771	94.635	99.3711	127.039
Macma4_01_g17880	0	0	0	0	0.341485	0	0	0	0	0	0.132687	0	0.256919	0.133591	0.0604167	0	0	0
Macma4_01_g17890	3.56988	6.39984	10.8607	2.43841	6.42246	2.01522	3.06303	1.87078	2.27216	5.80818	2.96782	1.72778	4.02258	4.06883	3.53075	3.00578	4.91005	2.34317
Macma4_01_g17900	0	0	0	0	0	0	0	0	0	0	0	0	0	0	0	0	0	0
Macma4_01_g17910	15.8997	13.8817	20.7763	8.01545	8.14395	4.16343	5.82045	4.94185	5.22528	9.94492	8.37215	15.7398	9.61663	7.89347	8.27037	5.44731	20.6335	5.82258
Macma4_01_g17920	25.8131	19.1193	7.0558	17.4036	11.5671	22.7376	17.7374	17.7602	25.3484	23.6049	11.5511	35.983	23.2416	19.8843	25.4423	28.9823	28.8602	21.563
Macma4_01_g17930	27.3906	38.1018	37.5955	28.8928	26.7041	31.4651	38.9445	34.349	30.1065	34.9741	40.7662	41.3501	38.4377	32.8265	36.2151	36.689	33.2857	34.8316
Macma4_01_g17940	19.8635	16.372	3.66159	22.2409	4.62988	24.3954	10.784	20.7255	25.779	10.4063	2.68334	15.1526	18.185	17.5797	15.5911	25.7832	21.551	18.4166
Macma4_01_g17950	1.07834	2.02448	2.67581	1.00464	0.232389	0.645549	0.35785	4.18305	0.347132	0.625572	1.42969	0.834053	0.1457	0.328293	0.0456833	0.385145	0.754139	0.767102
Macma4_01_g17960	21.0132	24.9041	20.4245	23.512	22.5612	23.6983	24.3222	23.9436	24.5327	24.4435	21.6951	24.3568	23.9958	23.2082	22.9158	26.2508	20.6295	20.6382
Macma4_01_g17970	0.469931	0.721605	0.585792	0.89808	0.161575	0.842529	0.599798	0.692878	0.531961	0.357899	0.863239	0.426048	0.857447	0.349907	0.51047	0.38118	0.348696	0.594303
Macma4_01_g17980	1.85205	2.46474	0.328264	12.1447	0.0221738	9.06941	0.441749	3.67671	1.06464	0.0859535	0.473867	0.0204641	1.33461	1.82165	1.1573	2.83494	2.30016	0.153708
Macma4_01_g17990	0.995364	0.122087	0.227641	0.981797	1.23015	0.799625	0	0	0.708763	0.447046	0.418234	0.340589	0.318144	0.300775	0.299257	0.262126	0.433616	0
Macma4_01_g18000	50.8792	14.4647	11.6515	39.7483	9.76648	35.1857	20.5632	15.8935	44.6318	55.7199	12.5521	12.2028	31.8409	27.2838	36.0204	43.5696	25.044	36.5536
Macma4_01_g18010	14.0582	12.1017	7.822	17.5843	11.0379	16.6441	17.4697	9.4722	22.364	21.8414	6.96094	12.9602	18.8045	21.5339	23.2604	15.0233	10.0106	19.2287
Macma4_01_g18020	1168.63	2381.5	912.174	3268.57	1640.43	2185.52	2080.84	3983.55	1744.02	443.397	1395.53	1657.85	1651.86	1968.17	1136.77	1288.96	1803.69	2085.37
Macma4_01_g18030	29.9947	80.9463	74.8927	80.3974	63.1795	54.5385	57.2766	76.0999	22.6078	53.653	171.416	53.5446	44.4426	63.6478	33.9861	22.2302	28.247	46.5565
Macma4_01_g18040	54.3881	22.2432	25.33	36.6979	19.2183	20.4856	10.9705	11.1774	10.5758	19.5848	25.9433	48.9913	15.2255	15.349	8.6709	15.6648	23.4036	23.1214
Macma4_01_g18050	8.02007	16.333	10.0998	13.5127	15.9102	13.3162	7.30364	15.5858	10.222	8.6767	19.6925	21.1859	20.1057	13.6324	15.0194	12.6422	12.8213	16.5868
Macma4_01_g18060	4.46567	6.18776	1.73257	6.70184	12.2539	7.94251	8.28365	6.49202	8.11523	5.36514	6.21556	19.2836	10.2509	8.25676	8.66592	6.04548	5.06327	8.88125
Macma4_01_g18070	75.1895	64.1024	57.38	72.8465	85.5758	78.8193	76.4267	66.9608	79.5333	105.702	73.2656	91.2939	94.0101	92.5656	99.0882	76.757	73.4174	81.9
Macma4_01_g18080	21.0148	40.47	69.4111	22.811	28.8888	28.3686	45.8315	30.1239	11.4997	17.5974	66.2525	24.8439	18.6979	20.7335	15.3205	16.0451	22.7651	17.9105
Macma4_01_g18090	13.8659	80.1349	31.3823	27.5251	18.8472	45.0173	61.8153	114.105	41.1645	5.68756	28.329	8.51554	24.5246	27.457	17.1008	21.4663	36.4699	37.1484
Macma4_01_g18100	6.92563	17.8755	19.4076	22.2645	23.4177	17.9599	20.3612	14.3151	14.3893	8.44624	23.9469	15.3392	15.8826	26.6412	13.7096	10.3079	14.6195	17.365
Macma4_01_g18110	0	0	0.0209847	0	0	0	0	0	0	0	0	0	0	0	0	0	0	0
Macma4_01_g18120	0	1.65544	0.318469	2.33434	0.301169	1.18155	0.7826	0.728537	1.13457	0.336762	0.450082	1.34698	1.00221	2.22044	0.573825	0.86389	1.25992	1.51415
Macma4_01_g18130	1.31025	3.26202	4.17072	5.72343	12.7289	4.18335	3.46811	3.13216	2.58235	2.20069	5.86309	4.30187	4.49609	7.94867	4.22917	2.41945	3.61112	4.5568
Macma4_01_g18140	0	0	0	0	0	0	0	0	0	0	0	0	0	0	0	0	0	0
Macma4_01_g18150	0	0	0	0	0	0	0	0	0	0	0	0	0	0	0	0	0	0
Macma4_01_g18160	0	0	0	0	0	0	0	0	0	0	0	0	0	0	0	0	0	0
Macma4_01_g18170	0	0	0.0266074	0	0	0	0	0	0	0	0	0	0	0	0	0	0	0
Macma4_01_g18180	0	0	0	0	0	0.240415	0	0	0	0	0	0	0	0	0	0	0	0
Macma4_01_g18190	0.798187	3.63277	0.367464	8.75954	3.12752	3.63733	0.762534	3.35569	3.55943	1.68381	3.3081	4.36164	4.20493	6.88789	1.94691	3.75175	3.42977	5.3913
Macma4_01_g18200	0	0	0	0	0	0	0	0	0	0	0	0	0	0	0	0	0	0
Macma4_01_g18210	0	0	0	0	0	0	0	0	0	0	0	0	0	0	0	0	0	0
Macma4_01_g18220	0	0	0	0	0	0	0	0	0	0	0	0	0	0	0	0	0	0
Macma4_01_g18230	0	0	0	0.0151705	0.0760319	0	0	0	0	0	0	0	0	0	0	0	0	0
Macma4_01_g18240	0	0	0	0	0	0	0	0	0	0	0	0	0	0	0	0	0	0
Macma4_01_g18250	26.972	57.9708	46.6671	47.3629	33.6401	40.4044	41.8749	42.2398	39.7068	17.0585	52.2731	63.8045	49.4448	51.7223	44.4412	40.8435	55.9664	45.2531
Macma4_01_g18260	0	0.287057	0	0	0	0	0	0	0	0	0	0	0	0	0	0	0	0
Macma4_01_g18270	303.519	125.382	104.858	240.704	393.645	208.632	178.002	180.606	257.391	346.38	116.299	125.053	232.702	211.257	299.575	279.269	163.464	240.454
Macma4_01_g18280	12.5698	10.8209	11.3533	11.581	26.0576	12.2358	14.4757	11.2863	11.3729	17.9898	16.0342	14.6189	15.5234	14.8597	17.3836	11.6268	11.3161	13.2126
Macma4_01_g18290	103.023	127.742	105.47	99.2606	129.081	108.228	119.546	106.373	102.389	118.46	122.165	126.466	123.437	120.112	128.108	113.601	90.2161	96.8239
Macma4_01_g18300	0.94801	3.57648	12.0321	4.78411	1.73089	4.54021	2.92479	0.730086	0.108991	0.989934	1.37817	0.157124	0.800562	1.72059	0.125506	2.59993	13.86	0.477691
Macma4_01_g18310	0	0.0855611	0	0	0.431055	0	0.373372	0.082155	0	0	0	0	0	0	0	0	0	0
Macma4_01_g18320	0.399582	0.822978	1.68627	1.18788	0.765443	0.999366	0.663011	0.769954	0.592109	1.11268	4.02754	0.333589	0.999803	1.82995	0.583078	0.724909	0.535341	0.968561
Macma4_01_g18330	25.6494	12.6731	8.90405	24.8323	14.1111	18.3219	13.8257	20.0605	25.8569	15.3338	12.8984	12.6388	15.3592	15.6108	16.6575	31.5474	17.9857	23.3662
Macma4_01_g18340	7.91352	10.4807	14.409	6.71209	6.25955	8.17605	12.5589	8.07514	4.5797	4.80747	12.1403	11.3377	4.92567	6.53839	4.23773	5.01316	7.26903	6.26197
Macma4_01_g18350	0.118077	0.224483	1.31549	0.225655	0	0.904787	0.29388	0	0.217202	0	1.09859	0.834993	0.106359	0.774254	0.500224	0.72296	0.569496	0.783965
Macma4_01_g18360	10.4808	7.94248	10.5613	7.59047	7.22671	10.2552	12.905	8.60838	9.4442	9.71591	8.96036	7.31532	9.0219	8.97167	9.37545	8.14686	7.63694	10.0796
Macma4_01_g18370	34.9071	15.0895	16.7982	19.3156	21.1604	25.0459	21.4869	14.9629	23.2057	37.6446	18.344	15.6546	24.9442	23.9145	36.4309	20.2505	19.5128	18.532
Macma4_01_g18380	8.52019	8.7282	12.3158	7.07435	6.21954	8.75522	8.87007	8.30523	6.60011	9.98151	12.2371	7.71425	7.20898	7.6713	8.46311	7.25956	8.01927	7.64983
Macma4_01_g18390	13.4878	16.6206	25.0689	15.1397	14.4057	15.9881	21.7952	16.8433	12.0712	15.289	24.5246	17.8012	14.9958	15.3988	13.2006	14.1347	16.25	15.498
Macma4_01_g18400	0.0371821	0.424136	1.31806	0.106588	0.142453	0.0356145	0.0925422	0.203626	0	1.03537	0.484321	0	0.133969	0.174151	0	0	1.86507	0.0352671
Macma4_01_g18410	28.3165	1.2315	8.71633	3.58116	6.42587	12.9852	7.94589	10.8535	9.57502	25.2097	6.54339	6.17581	0.208386	0.780157	1.72493	14.4008	122.916	6.18788
Macma4_01_g18420	0	0.0518037	0.0275978	0.0260371	0	0.104398	0	0.198966	0.0250617	0	0	0	0	0	0	0	0.262844	0.10338
Macma4_01_g18430	5.68549	1.72945	0.625196	3.29069	0.622352	4.29439	1.30724	3.38051	2.3158	1.53795	0.680117	2.31182	2.13631	1.97818	1.52776	2.90093	6.04845	1.46372
Macma4_01_g18440	15.6152	48.5445	10.4898	50.587	7.66893	55.9357	14.9047	38.7221	15.0216	1.84873	16.3816	20.9512	26.2295	21.7547	12.9943	23.4551	15.9466	4.98737
Macma4_01_g18450	14.9581	41.246	11.3023	35.5059	5.45786	39.6278	11.0801	20.696	11.4101	4.9035	10.7691	13.6944	16.6817	17.0701	6.43748	19.0197	9.90553	6.81233
Macma4_01_g18460	2.61364	2.88036	2.60352	6.71019	4.81414	5.43331	4.25331	5.57071	4.53042	3.59898	2.76577	5.54734	2.30253	1.66808	1.28977	1.99303	2.31338	3.93647
Macma4_01_g18470	2.77866	6.18692	0.278893	4.49698	0.983042	1.3907	1.37069	2.85607	4.30549	0.975893	2.58527	2.89876	4.5774	3.11878	3.88145	2.17135	2.26985	2.96795
Macma4_01_g18480	7.11636	2.59637	2.99219	4.70496	5.16099	4.60948	6.72094	2.78131	3.60588	9.58903	4.47744	2.44723	3.79923	5.18677	5.3684	4.28516	2.50925	4.24728
Macma4_01_g18490	39.4794	41.5169	23.2256	60.3907	39.6836	60.3368	29.617	58.5702	57.8227	28.907	21.2583	34.9958	44.0684	40.1343	34.26	42.4637	37.6552	40.1254
Macma4_01_g18500	2.77175	1.92119	2.01774	5.21429	3.31848	5.1715	4.09603	3.0833	3.02731	2.27794	2.41766	2.88396	3.38093	3.02916	3.08236	3.38828	3.28641	2.87546
Macma4_01_g18510	0.139887	0.132974	0.495881	0.133668	0.066992	0	0	0.0638402	0	0	0.390453	0	0.25201	0	0	0	0.134938	0
Macma4_01_g18520	0	0	0	0	0	0	0	0	0	0	0	0	0	0	0	0	0	0
Macma4_01_g18530	0	0.16374	0	0	0.103115	0.0824953	0.285812	0	0	0	0.0400661	0.13323	0	0	0	0.0439446	0.0207699	0
Macma4_01_g18540	1.29009	5.7813	1.49329	3.25795	1.14739	9.17947	0.305799	1.17752	0.466148	1.58236	0.685887	0.610917	1.61859	0.992685	0.351346	0.940354	0.844447	0.874031
Macma4_01_g18550	9.36263	13.7492	11.5369	10.5713	6.45586	10.1649	10.9799	9.91071	9.13888	10.9343	11.5512	8.74698	9.2824	9.46129	9.77285	9.55427	10.6124	8.31689
Macma4_01_g18560	36.0139	26.2243	26.1815	25.497	35.0414	26.7894	30.1152	20.4224	26.1619	57.4221	41.2809	28.405	31.0893	29.4994	39.5898	28.1281	23.6956	26.0765
Macma4_01_g18570	54.6463	68.751	111.753	34.9139	36.1269	42.5009	29.8013	42.9728	29.1646	53.2126	146.564	86.9817	33.7097	39.0519	28.3671	26.7737	53.127	39.4145
Macma4_01_g18580	53.5514	23.7674	22.7052	44.9244	34.56	34.9858	19.3338	24.2033	38.452	57.6936	27.6268	25.1702	32.7347	33.0737	38.3015	41.1176	29.5335	41.4403
Macma4_01_g18590	0	0.057671	0.245788	0.289861	0	0.348668	0.050333	0	0	0	0	0	0	0	0	0	0	0.0575444
Macma4_01_g18600	7.50924	5.65597	3.84066	5.3756	9.1637	7.55108	5.3813	3.67747	6.27561	11.7287	5.94211	4.49872	6.05618	7.85218	8.99415	5.52445	2.93593	6.59007
Macma4_01_g18610	0	0	0	0	0	0	0	0	0	0	0	0	0	0	0	0	0	0
Macma4_01_g18620	0	0	0	0	0	0	0	0	0	0	0	0	0	0	0	0	0	0
Macma4_01_g18630	0	0	0	0	0	0	0	0	0	0	0	0	0	0	0	0	0	0
Macma4_01_g18640	0	0	0	0	0	0	0	0	0	0	0	0	0	0	0	0	0	0
Macma4_01_g18650	0	0	0	0	0	0	0	0	0	0	0	0	0	0	0	0	0	0
Macma4_01_g18660	19.2062	13.5934	16.8784	13.7105	15.5301	17.4104	19.6307	13.8451	13.5816	18.305	19.8451	14.9583	14.6777	17.5242	19.0808	17.7281	13.9804	13.884
Macma4_01_g18670	23.2236	30.9627	40.9557	25.6652	25.2284	31.6255	37.4721	33.5056	33.3876	27.0484	33.4982	37.6466	37.8279	31.9542	39.8885	30.3998	27.0541	26.1796
Macma4_01_g18680	2.40327	0.0351463	0.337028	1.73116	0.0354133	1.27493	0.398766	0.337472	1.0882	2.33367	0.447203	0	0.899217	0.519521	0.751852	0.754605	1.24829	1.12221
Macma4_01_g18690	8.32651	9.30167	8.1298	9.00365	11.5398	9.44821	9.21057	9.98213	9.6164	10.261	10.7182	13.1801	11.9393	12.1651	10.5824	9.06019	7.18006	11.3005
Macma4_01_g18700	0.420448	1.52815	2.37969	0.401757	0.213198	0.592238	0.677115	0.541779	0.318465	1.69878	2.83035	0.174897	0.646059	0.787706	0.398151	0.908585	0.477145	0.680294
Macma4_01_g18710	10.4869	11.25	6.5257	10.6904	22.8516	11.4391	10.0869	10.5314	10.6867	13.5124	12.0144	15.2513	15.3956	11.9448	15.3953	10.3989	6.4752	9.61434
Macma4_01_g18720	3.90085	2.71527	2.06465	2.98196	4.15809	3.95335	4.83352	3.3767	4.09705	6.13195	3.86352	3.67063	4.78323	5.28078	5.12831	3.85229	2.7311	4.428
Macma4_01_g18730	1.54658	1.63596	2.04929	1.48894	2.60623	2.28333	1.65934	1.64513	1.49733	2.77393	3.31065	3.32011	1.86446	2.13501	2.27596	2.04103	1.59282	2.29414
Macma4_01_g18740	41.4648	18.5329	26.575	27.6134	39.4281	31.698	37.0574	24.7524	31.9705	50.83	25.2837	25.3624	35.9329	35.5262	47.986	36.3889	26.7556	35.883
Macma4_01_g18750	0	0	0	0	0	0	0	0	0	0	0	0	0	0.121256	0	0	0	0
Macma4_01_g18760	0	0	0	0	0	0	0	0	0	0	0	0	0	0	0	0	0	0
Macma4_01_g18770	99.1831	211.706	159.712	134.3	205.908	121.28	138.221	159.061	115.791	75.5273	233.197	191.42	172.129	130.202	122.3	111.41	117.183	161.575
Macma4_01_g18780	0	0	0	0	0	0	0	0	0	0	0	0.318604	0	0	0	0	0	0
Macma4_01_g18790	200.487	225.409	185.163	228.196	117.518	173.081	160.783	282.328	213.997	131.647	194.12	194.04	138.284	169.065	134.726	228.223	179.34	188.563
Macma4_01_g18800	0.0355376	2.39848	2.77148	0.339578	0.612684	0.238275	0	0.518986	0.196114	0.197916	2.11611	0.53403	0.192066	0.199738	0	0.036265	0.137121	0.0337072
Macma4_01_g18810	8.74007	7.76998	6.66598	5.84946	4.88042	6.13464	6.78133	6.23337	6.41141	9.09785	8.46101	4.84818	6.94841	6.36416	6.20611	8.81064	4.98343	6.8803
Macma4_01_g18820	5.42293	4.64646	5.9595	4.61784	5.22943	7.20841	8.78381	6.49862	4.59754	6.47171	5.32009	4.7447	5.23369	5.47731	4.76669	3.82104	3.91441	4.74123
Macma4_01_g18830	8.1789	11.1011	22.7541	8.74523	14.4776	11.0768	22.6926	8.71256	7.53206	7.18803	15.9803	15.576	9.70798	10.9686	9.05271	13.7239	17.5967	9.72161
Macma4_01_g18840	0	0	0	0	0	0	0	0	0	0	0	0	0	0	0	0	0	0
Macma4_01_g18850	0.885574	1.3469	0.717543	1.18469	0.678564	1.01789	0.440819	1.29328	0.162901	0	1.15352	1.56561	1.75492	1.99094	0.600269	0.72296	0.341698	1.00796
Macma4_01_g18860	0.0253605	0.433931	0.128429	0.121166	0.194323	0.072874	0	0.0462952	0.116627	0.0235396	0.42472	0	0	0.285077	0.322315	0.0776389	0	0
Macma4_01_g18870	12.072	10.5866	12.3452	11.998	6.28506	11.8669	7.61883	12.0092	9.90535	13.8554	15.1	7.7487	8.75335	10.7297	8.7147	8.04234	7.16734	10.8801
Macma4_01_g18880	0	0	0	0	0	0	0	0	0	0	0	0	0	0	0	0	0	0
Macma4_01_g18890	4.35101	4.37928	3.70319	3.07452	6.02348	2.97683	3.60973	3.67099	2.95934	4.24223	3.74203	3.13504	3.55695	2.94553	3.71754	3.54459	2.46887	3.57203
Macma4_01_g18900	105.406	35.2429	3.98656	98.0459	75.318	45.9325	24.1971	55.3064	114.779	30.1355	3.88961	46.9708	88.0095	110.052	70.0247	80.5202	73.6492	56.2439
Macma4_01_g18910	0	0	0	0	0	0	0	0	0	0	0	0	0	0	0	0	0	0
Macma4_01_g18920	371.796	120.878	14.5085	327.81	228.032	156.167	74.8375	188.128	370.92	89.7582	13.7034	156.664	318.603	366.613	234.608	276.693	227.684	198.827
Macma4_01_g18930	0	0	0	0	0	0	0	0	0	0	0	0	0	0	0	0	0	0
Macma4_01_g18940	244.879	85.9074	11.5671	238.687	168.427	205.504	112.254	161.121	307.091	193.395	15.7587	154.328	232.718	342.64	229.215	303.238	239.95	224.303
Macma4_01_g18950	0.688711	0	0.0387523	0.694656	0.0366472	0.403135	0.41266	0.174615	0.598251	0	0.0355988	0	0.241253	0.071683	0.389024	0.0780898	0.442897	0.870986
Macma4_01_g18960	11.8051	4.85311	3.4291	9.61997	7.65239	9.48864	6.64321	8.19164	12.9997	12.9196	3.88341	8.34499	8.84255	8.47421	10.4122	12.6683	8.01791	11.418
Macma4_01_g18970	0.183528	0.0581529	0.0309803	0	0.0585947	0	0.101507	0	0	0	0.284592	0	0	0	0	0	0	0
Macma4_01_g18980	0.0807435	0.23026	0	0	0.154673	0	0	0	0	0	0	0.142747	0	0	0	0	0	0
Macma4_01_g18990	1.33415	0.766509	2.09371	0.58839	0.126382	0.800446	0.425713	0.869812	0.849522	1.53774	0.381939	2.22906	1.13573	1.23603	0.633528	1.18193	1.88093	0.903885
Macma4_01_g19000	13.2713	8.00095	8.02919	10.7735	9.71158	12.1493	12.9752	9.96931	11.8462	19.5132	9.25164	13.7383	12.9769	13.0002	17.2981	11.7252	13.4438	11.6038
Macma4_01_g19010	13.1476	7.28224	9.00816	9.26431	14.9942	13.6711	12.8831	9.36284	10.5608	14.0126	10.1178	10.3606	13.7606	12.1431	12.7683	10.3485	10.4812	11.8045
Macma4_01_g19020	0	0.298242	0	0	0.601014	0.150259	0	0.143184	0	0.436828	0	0	0.282611	0.14695	0.132917	0	0	0
Macma4_01_g19030	2.33123	1.32066	7.08336	2.02509	0	1.8044	0.957262	0.9242	0.77969	1.20214	1.86226	0.874235	0.996916	0.970565	0.299276	1.94641	4.20222	0.938069
Macma4_01_g19040	36.5291	58.1467	199.495	26.605	24.0598	27.0913	81.6583	43.5979	15.8906	39.4595	85.4934	70.6482	23.767	32.6378	23.2658	50.0156	187.967	34.8842
Macma4_01_g19050	3.25041	0	0.177951	0.167887	0.252426	2.01948	0	0.4811	2.10077	4.24015	0	0.232963	0.237393	0	0	0.358588	0.169482	0.999892
Macma4_01_g19060	0	0	0	0	0	0	0	0	0	0	0	0	0	0	0	0	0	0
Macma4_01_g19070	9.47342	10.5178	13.9074	7.65854	14.055	9.45504	9.90069	9.27881	5.23062	8.31458	14.5577	12.8802	6.72844	6.47278	6.94068	6.99115	12.6344	6.74961
Macma4_01_g19080	1.73515	0.929239	0.0495041	2.12506	0.0234075	2.13016	0.587977	1.96294	2.0904	1.11151	1.11415	1.57699	0.748458	0.503642	0.455545	0.872862	0.51863	2.7816
Macma4_01_g19090	1.11201	12.3544	21.8567	4.08428	1.73077	7.32276	8.33186	2.6326	0.159808	1.96757	11.8011	1.0444	1.00166	1.46485	0.147218	9.75196	36.1021	0.955857
Macma4_01_g19100	10.0519	15.2763	15.3354	12.1274	13.5719	17.9415	18.8512	13.4924	13.0521	12.878	15.7183	14.6349	11.9648	14.6781	11.8091	12.6713	12.4463	11.8377
Macma4_01_g19110	3.1476	7.2344	8.1393	2.54272	4.90812	3.72128	9.25324	5.16297	4.11174	2.69577	8.31874	4.98669	4.82813	3.88148	4.6188	4.72494	4.02632	5.30032
Macma4_01_g19120	0	0	0	0	0	0	0	0	0	0	0.0220667	0	0	0	0	0	0	0
Macma4_01_g19130	65.6731	67.0884	68.1596	59.5281	110.989	71.6012	79.5199	63.7157	71.3672	89.3246	78.0179	96.3314	87.6658	81.6917	94.0916	66.6031	61.7422	70.4366
Macma4_01_g19140	56.0557	44.7734	0.637915	50.0574	27.6189	41.7578	34.8735	60.4874	73.3437	51.5987	3.49055	89.4671	60.3597	56.1269	73.0644	81.9902	61.9972	59.0647
Macma4_01_g19150	4.3362	5.44615	2.36481	5.00587	0.939644	3.92786	2.16498	3.00866	4.92662	2.98677	1.46042	2.82705	3.00453	4.11706	2.69317	4.12462	3.14183	3.92676
Macma4_01_g19160	3.8884	2.5375	1.8441	2.3001	3.04448	1.93613	3.07232	2.99983	2.38423	2.50639	1.43563	3.57355	2.65469	2.13921	2.0918	2.9445	2.42613	2.40021
Macma4_01_g19170	20.3631	16.8761	18.0011	20.881	25.1151	24.3712	24.5206	21.0463	21.6443	19.8735	19.8104	23.6971	26.8605	24.1246	22.5411	20.6386	19.4583	24.1585
Macma4_01_g19180	5.57251	1.77609	0.796794	5.13685	2.60589	4.08167	4.32398	4.09892	6.18052	3.6511	0.609962	1.04312	5.13762	3.83825	3.83276	7.12494	3.85761	5.40986
Macma4_01_g19190	0.351959	0.468392	0.784237	1.21073	0.0674215	0.809088	0	0.513995	0.776914	0.5227	1.24436	0.124446	0.380438	0.725331	0.119284	1.29299	0.407409	1.00149
Macma4_01_g19200	18.1456	22.8622	36.6505	11.5852	14.1511	28.2364	18.8442	17.0503	11.4399	14.4582	20.8195	8.83681	9.30852	9.07057	7.54445	18.0306	12.6484	18.0269
Macma4_01_g19210	0.976848	0.512317	0.818791	0.836861	0.0645261	1.09698	0.503021	0.368941	0.681587	0.844177	1.06556	0.625284	0.7282	0.410198	0.371025	1.06559	0.35742	0.766788
Macma4_01_g19220	2.02801	2.7796	4.53793	1.23933	2.50709	3.03799	2.97372	1.86181	1.26881	1.56501	2.94	2.2721	1.04083	0.982999	0.959055	2.39439	2.55906	1.34202
Macma4_01_g19230	0	0	0	0	0	0	0	0	0	0	0	0	0	0	0	0	0	0
Macma4_01_g19240	3.65668	10.4911	14.6122	1.93765	3.18398	4.20301	5.1297	6.22007	2.41541	3.23985	7.08273	5.64189	3.62318	2.92714	2.8166	3.6976	5.41923	3.68906
Macma4_01_g19250	0.0446993	0	0	0	0	0	0.370839	0	0	0	0	0.19756	0	0.209359	0.227239	0	0	0
Macma4_01_g19260	3.93932	6.81022	6.9667	3.7447	2.18957	3.06942	2.15057	4.34078	1.59571	1.8756	0.41779	2.32746	4.39413	3.6519	3.06104	2.41614	3.76058	1.64558
Macma4_01_g19270	0	0	0	0	0	0	0	0	0	0	0	0	0	0	0	0	0	0
Macma4_01_g19280	0	0	0	0	0	0	0	0	0	0	0	0	0	0	0	0	0	0
Macma4_01_g19290	14.1129	9.85819	7.98358	10.2901	10.0093	12.3167	13.5911	11.5914	12.4677	17.035	12.1121	10.4869	10.238	11.5234	12.4637	12.5736	8.94773	14.9342
Macma4_01_g19300	5.63632	12.0704	3.93696	9.37866	14.7683	7.88085	5.72415	7.30283	5.92884	8.71938	9.79493	11.3389	9.77468	10.2562	10.9235	6.41281	6.99926	5.13096
Macma4_01_g19310	0	0	0	0	0	0	0	0	0	0	0	0	0	0	0.0519786	0	0	0
Macma4_01_g19320	12.4444	12.1125	12.1843	12.1015	11.0883	12.4779	14.4819	15.1998	13.2323	13.5461	17.6988	11.8244	13.2974	15.8907	12.6616	14.6681	19.5739	17.0358
Macma4_01_g19330	104.217	80.2178	84.9166	82.9491	94.3607	84.0829	98.2808	80.6227	90.0373	125.319	101.866	76.5617	99.3944	96.1984	103.614	104.239	72.0273	86.7427
Macma4_01_g19340	9.97975	10.503	7.85152	11.8593	15.4962	12.0829	16.4323	15.1273	18.0533	11.7562	7.79293	18.9372	13.5644	13.1165	15.3476	16.3542	11.6159	20.006
Macma4_01_g19350	3.5815	1.38021	1.92809	1.72656	9.08585	4.69763	0.562142	16.7867	0.860616	3.86343	7.2949	2.42432	0.261574	0.846295	0.136692	0.164631	9.64852	3.36643
Macma4_01_g19360	0	0	0	0	0	0	0	0	0	0	0	0	0	0	0	0	0	0
Macma4_01_g19370	0	0	0	0	0	0	0	0	0	0	0	0	0	0	0	0	0	0
Macma4_01_g19380	17.8382	8.39001	8.7041	13.7235	19.414	18.9549	11.5168	9.33508	11.9774	18.3612	6.61995	8.38365	11.8766	11.0529	12.2277	10.4843	8.0733	9.69343
Macma4_01_g19390	8.1874	6.00525	11.6708	5.41684	6.543	8.01165	12.6346	5.62779	5.84145	7.30244	9.75709	7.15537	7.19282	7.0225	6.85858	8.09712	9.03528	7.04667
Macma4_01_g19400	15.2711	15.8344	24.686	13.9394	19.5055	15.8205	18.3456	14.3053	12.3361	13.354	16.7134	18.4278	14.6425	15.1145	14.7096	12.6412	22.9394	15.1326
Macma4_01_g19410	3.21794	1.61748	2.33302	1.51532	1.85151	2.8827	3.42835	2.0074	1.84183	3.8894	2.57396	2.77288	2.32514	2.29874	2.29498	2.42151	3.53956	2.29464
Macma4_01_g19420	2.92537	0.0501046	8.6484	0.0503662	0.0252426	0.151461	0.546616	0.216495	2.20581	1.83468	0	0.908555	0.0949573	0	0	1.61365	10.7282	0.149984
Macma4_01_g19430	102.712	122.75	92.452	132.098	218.497	102.41	127.216	141.978	137.563	117.508	95.0118	133.639	128.167	136.772	154.866	174.636	109.48	130.305
Macma4_01_g19440	12.7567	14.7962	16.7039	12.3218	16.5651	15.0019	13.5449	13.3737	12.1275	14.1524	19.2451	14.9454	16.4884	17.8988	14.22	12.9755	11.905	13.6745
Macma4_01_g19450	12.5754	6.74327	8.92656	9.20915	5.16451	11.0501	8.61983	8.02814	10.2482	12.0217	8.3335	13.0796	9.10072	10.6221	8.1051	12.4672	9.90142	10.9932
Macma4_01_g19460	4.21583	0.37228	0.746646	2.35541	1.83141	2.339	1.31876	0.651839	2.54263	3.54961	0.21434	0.997831	3.46544	3.25859	4.04048	3.1972	0.822225	2.16323
Macma4_01_g19470	17.565	21.3994	14.6315	22.3675	23.7594	15.4854	22.6022	20.2203	21.6944	20.5295	21.5121	28.7718	23.3777	25.2518	22.9314	17.0832	14.3156	17.2043
Macma4_01_g19480	8.41214	5.00375	9.23425	5.75187	6.48916	6.63415	8.29536	6.2988	5.44374	8.27569	13.0288	6.58993	6.66988	5.56793	7.29822	5.68005	5.92798	7.11888
Macma4_01_g19490	0.141997	0	0	0.0904565	0	0	0	0.0864044	0	0.0878677	0	0	0	0	0	0.0966025	0.0913157	0.0448946
Macma4_01_g19500	0	0.264265	1.05588	0.398467	0	0.332853	0	0.317181	0	0	0	0.0614354	0.375622	0.260418	0	0	0	0.131842
Macma4_01_g19510	0	0	0	0.0206554	0	0	0	0.0197301	0.11929	0	0	0.0191079	0.0194712	0	0	0	0.0208516	0
Macma4_01_g19520	0.933395	0.417538	0	0.367253	0.0525887	0.473317	0	0.0501145	0.151498	0.254816	0.204337	0.873611	0.296742	0.0514326	0.325646	0.336177	0.0529631	0.416622
Macma4_01_g19530	9.36544	13.803	13.3546	10.9901	16.9963	12.3346	14.3299	11.6226	9.97394	14.6408	17.561	13.834	12.5431	13.198	15.2266	7.71278	10.9955	11.3961
Macma4_01_g19540	0	0	0	0	0	0	0	0	0	0	0	0	0	0	0	0	0	0
Macma4_01_g19550	17.6645	15.5493	24.0827	13.0491	23.2029	18.2555	25.3516	15.8749	13.0282	21.4844	26.3908	20.8091	17.4126	17.3852	19.2326	18.0261	21.2952	17.936
Macma4_01_g19560	0.656015	0	0.765534	0.0272544	0	0.136599	0.272125	0.182235	0.0787003	0.728047	0.145955	0.0252124	0.012846	0.360696	0.03625	0.0145531	0.316403	0.0541067
Macma4_01_g19570	0.149065	0	0.037744	0	0	0.0713901	0	0.30613	0.342756	0.207543	0	0.329416	0	0	0	0.038029	0.107843	0.141387
Macma4_01_g19580	0.657855	0	0	0.145064	0	0.145412	0	0	0.13963	0.140912	0	0	0	0.0474033	0	0	0	0.191992
Macma4_01_g19590	0.42538	0	0.95741	0.361307	0	0.769621	0.509757	0.517682	0.434715	1.49161	1.53913	0	0.596038	0.309924	0.680793	0.192928	0	0.448302
Macma4_01_g19600	4.67439	2.75067	0.450888	3.19043	6.75126	2.27419	4.30891	1.15128	2.32024	3.85668	4.34907	6.2963	2.94068	3.82269	2.7661	3.71006	2.57658	3.87064
Macma4_01_g19610	0.338187	0.491666	2.5387	0.684323	0.228647	0.552584	0.92423	1.16208	0.146375	0.406229	0.703335	0	0.21503	0.614955	0.101132	0.0203005	0.0383791	0.320768
Macma4_01_g19620	0.389095	3.85718	2.83365	10.1979	6.42423	1.98768	2.8745	3.14555	0.426035	0.859898	4.51657	0.507723	1.81917	5.18954	1.41289	0.510504	2.0375	1.15989
Macma4_01_g19630	9.892	16.1278	18.2161	27.1537	15.1306	18.6628	13.5784	23.3381	15.3842	19.8659	48.7788	12.1622	17.2267	21.0878	20.6487	16.9465	18.9973	21.8072
Macma4_01_g19640	0.74466	1.10666	1.65713	0.541184	1.02465	0.934277	0.948442	0.746692	0.472678	1.22662	1.81503	0.871479	0.529052	0.766331	0.808672	1.02747	0.394568	0.756047
Macma4_01_g19650	9.91907	8.34314	7.41944	8.55083	4.65567	11.4915	9.59713	7.73666	7.53541	11.3512	8.47765	9.13997	11.3173	10.3294	11.1475	6.97593	7.00008	8.56105
Macma4_01_g19660	3.20184	4.9205	8.01714	3.38245	4.10601	4.3447	9.43001	3.66929	1.21068	2.295	6.00765	2.48435	2.82001	3.24925	1.2208	4.19313	2.84834	3.27313
Macma4_01_g19670	7.02675	5.03045	5.98099	6.24554	4.02807	8.91245	6.49834	5.58191	8.39687	10.9951	4.53238	7.48146	9.1548	7.15679	10.1999	7.72491	5.3921	8.07758
Macma4_01_g19680	14.5874	12.9494	9.87191	18.9267	18.9241	19.3829	20.8453	16.3402	16.6932	17.3824	15.0222	14.3524	20.3077	22.7719	20.1082	14.5915	13.9998	15.6898
Macma4_01_g19690	26.5179	14.2761	15.8048	21.9767	5.59264	22.2737	8.33463	13.9871	10.9051	11.9046	14.4001	27.475	13.0915	16.7912	9.37618	16.1583	29.1461	14.3899
Macma4_01_g19700	17.3284	28.9772	26.144	26.9894	7.46478	19.5892	8.71284	19.474	9.10006	10.1328	14.1682	13.1677	9.53457	10.7439	7.00154	13.0015	38.2294	12.1893
Macma4_01_g19710	25.8491	12.3634	25.1895	6.31136	3.16314	11.5205	11.1285	13.9552	11.1749	19.3005	14.4149	15.3531	1.7261	4.50672	2.10726	13.0643	76.9669	10.1319
Macma4_01_g19720	4.04175	3.55829	7.48178	2.84011	1.64377	4.77664	5.86029	2.86044	3.62589	5.99093	3.87616	4.49612	2.95733	3.12207	4.09889	4.16255	4.96642	3.53869
Macma4_01_g19730	1.03833	2.78159	3.20273	1.08237	0.678078	1.71786	1.25299	1.80929	1.04182	2.93514	2.59081	1.37675	1.27539	0.928439	1.8795	0.770605	1.45687	1.16391
Macma4_01_g19740	31.1719	36.8872	26.1327	44.7369	51.0164	41.735	49.5525	47.1432	54.5939	37.9212	31.2115	53.166	61.8713	55.7765	55.5107	46.8773	42.1916	43.7734
Macma4_01_g19750	0	0.0994138	0.176538	0.666219	0	0.133564	0.520587	0.159094	0.384757	0.0323576	0.0324345	0.431413	0.345414	0.326556	0.472593	0.0711485	0.168137	0.264522
Macma4_01_g19760	0.252633	0.384238	1.33054	1.25529	0.677524	0	0	0.461177	0.0464718	0.0937975	0.799172	0.446631	0.18205	1.13593	0.256864	0.206243	0.487391	0.239621
Macma4_01_g19770	12.3264	27.9424	102.311	15.2172	16.7672	18.6685	43.0959	12.8011	7.45504	18.6059	46.015	30.919	13.1178	18.5094	10.8002	22.0514	57.2943	11.3088
Macma4_01_g19780	109.706	160.424	170.997	69.8282	77.8761	58.4743	88.8767	74.7281	97.6368	99.709	201.343	139.006	100.448	79.8917	105.443	93.8618	69.6409	84.2608
Macma4_01_g19790	15.2254	17.3547	22.5713	15.3081	9.78215	16.0934	19.2154	14.524	14.5736	12.5564	18.3026	18.8538	16.2996	16.1934	14.7611	15.647	16.3113	14.569
Macma4_01_g19800	84.0591	90.2402	46.3439	102.139	80.6162	98.695	65.2409	103.816	150.798	64.0105	45.7808	109.864	124.811	85.4494	98.9374	114.848	90.0598	109.208
Macma4_01_g19810	10.5499	7.16325	6.09309	11.077	10.0326	14.8449	12.1702	10.2484	7.94744	6.50496	8.93927	6.70557	8.23591	13.3533	10.0774	7.63863	10.2615	6.30174
Macma4_01_g19820	13.5964	9.2703	12.2548	11.3812	5.67385	10.9105	12.4433	10.8857	11.4185	13.0443	11.4042	9.65108	14.7874	12.3674	16.0454	13.0387	10.2279	10.1316
Macma4_01_g19830	53.7239	36.1188	8.272	48.7529	10.4865	37.5389	26.5671	32.1603	36.7847	38.8315	11.9905	28.2201	28.0687	29.3367	28.6095	45.5897	35.7454	28.7016
Macma4_01_g19840	4.50841	2.71647	4.2606	3.62957	5.50822	4.59036	4.43242	3.48318	3.52625	6.75483	4.73961	4.86385	5.67582	4.67216	4.75235	4.45579	3.4757	4.86545
Macma4_01_g19850	1.25101	2.57658	4.43469	1.32822	0.732248	1.06513	0.11532	2.41057	1.02277	0.322552	3.16852	0.368612	0.50083	1.04167	0.471097	0.354617	1.34084	3.88935
Macma4_01_g19860	23.7848	23.6095	6.3325	28.8749	36.8314	27.4243	37.3259	29.6358	30.4741	28.3927	23.1243	43.955	38.0404	39.3903	37.017	24.9492	27.71	25.4963
Macma4_01_g19870	0.021659	0	0.219367	0.0827847	0	0	0.0718759	0	0	0	0	0	0	0	0	0	0.0626782	0.0616304
Macma4_01_g19880	4.16069	5.52233	3.54452	5.21675	5.1248	5.52724	3.80025	5.60062	4.73521	2.99572	4.33421	6.00831	4.36426	5.32538	4.40828	4.7379	3.93097	4.50701
Macma4_01_g19890	39.2183	39.0199	62.9065	42.1106	32.5271	35.8674	25.2099	39.0575	14.3482	21.9223	42.4622	43.886	21.065	18.9675	17.2299	24.2498	46.7421	30.3373
Macma4_01_g19900	12.026	8.53316	10.0155	11.4097	13.5384	11.8466	13.8309	10.7165	11.4279	14.7335	11.1891	11.7388	9.26676	13.2675	13.908	14.2497	9.1815	10.866
Macma4_01_g19910	19.9064	14.0909	10.8562	16.0544	11.8961	16.7856	14.5741	15.7817	16.6658	21.9119	16.8786	16.4307	17.7585	16.8343	24.2365	17.7529	14.4016	17.5094
Macma4_01_g19920	2.42299	2.30325	1.88774	2.49338	2.72242	2.4101	2.04884	2.08397	2.2714	2.33552	0.563589	3.04796	2.35043	3.18635	3.03998	5.04027	2.60695	2.74016
Macma4_01_g19930	10.4377	7.0896	8.27501	7.69961	8.39984	9.42326	11.3645	8.2612	9.08299	13.4105	9.72869	8.23255	9.99267	9.90033	9.14539	10.4601	8.42349	9.22468
Macma4_01_g19940	20.6269	13.4336	24.474	13.2594	14.6949	18.4183	27.3308	15.0927	14.7539	24.2329	25.5514	14.4057	16.7373	16.6474	17.6791	18.431	16.4193	17.3655
Macma4_01_g19950	24.864	18.8072	24.6923	21.1853	16.2688	24.0533	24.3812	21.336	23.9333	26.4117	20.6059	19.8069	21.2901	23.1142	25.9009	25.1078	22.9589	22.4519
Macma4_01_g19960	0	0	0	0	0	0	0	0	0	0	0	0	0	0	0	0	0	0
Macma4_01_g19970	75.7009	114.803	103.01	89.658	41.3126	90.1128	85.6746	87.8098	71.2932	74.2691	108.818	97.031	91.7253	97.0875	95.2839	79.9296	60.782	79.1541
Macma4_01_g19980	7.76713	8.57141	8.13798	6.91	11.8859	7.52518	11.5545	8.39317	5.41945	8.78392	12.0443	10.417	7.72011	9.7011	9.68239	6.83286	10.2481	7.87516
[truncated: 36,051 more rows]

## Sheet: Table S3
Table S3 The integrated function annotation of all identified genes
ID	COG_class	COG_class_annotation	GO_annotation	KEGG_annotation	KOG_class	KOG_class_annotation	Pfam_annotation	Swissprot_annotation	TrEMBL_annotation	nr_annotation
Macma4_02_g26030	--	--	Cellular Component: plasma membrane (GO:0005886);; Cellular Component: integral component of membrane (GO:0016021);;	--	--	--	Domain of unknown function (DUF588)	CASP-like protein 4A4 OS=Arabidopsis thaliana OX=3702 GN=At4g11655 PE=2 SV=1	CASP-like protein OS=Musa acuminata subsp. malaccensis OX=214687 GN=103976673 PE=3 SV=1	PREDICTED: CASP-like protein 4A4 [Musa acuminata subsp. malaccensis]
Macma4_11_g22170	[E]	Amino acid transport and metabolism	Cellular Component: cytoplasm (GO:0005737);; Biological Process: L-phenylalanine catabolic process (GO:0006559);; Biological Process: cinnamic acid biosynthetic process (GO:0009800);; Molecular Function: phenylalanine ammonia-lyase activity (GO:0045548);;	K10775|0|mus:103972164|(RefSeq) phenylalanine ammonia-lyase-like; K10775 phenylalanine ammonia-lyase [EC:4.3.1.24]	[Q]	Secondary metabolites biosynthesis, transport and catabolism	Aromatic amino acid lyase	Phenylalanine ammonia-lyase 1 OS=Narcissus pseudonarcissus OX=39639 GN=PAL1 PE=2 SV=1	Phenylalanine ammonia-lyase OS=Ensete ventricosum OX=4639 GN=B296_00026369 PE=3 SV=1	PREDICTED: phenylalanine ammonia-lyase-like [Musa acuminata subsp. malaccensis]
Macma4_08_g09100	[H]	Coenzyme transport and metabolism	--	K06133|0|mus:103993428|(RefSeq) L-aminoadipate-semialdehyde dehydrogenase-phosphopantetheinyl transferase-like isoform X1; K06133 4'-phosphopantetheinyl transferase [EC:2.7.8.-]	[EH]	--	4'-phosphopantetheinyl transferase superfamily	L-aminoadipate-semialdehyde dehydrogenase-phosphopantetheinyl transferase OS=Pongo abelii OX=9601 GN=AASDHPPT PE=2 SV=1	Uncharacterized protein OS=Musa acuminata subsp. malaccensis OX=214687 PE=4 SV=1	PREDICTED: L-aminoadipate-semialdehyde dehydrogenase-phosphopantetheinyl transferase-like isoform X1 [Musa acuminata subsp. malaccensis]
Macma4_05_g04480	--	--	--	--	--	--	--	--	Uncharacterized protein OS=Musa acuminata subsp. malaccensis OX=214687 PE=4 SV=1	unnamed protein product [Musa acuminata subsp. malaccensis]
Macma4_03_g34620	[K]	Transcription	Molecular Function: DNA-binding transcription factor activity (GO:0003700);; Cellular Component: nucleus (GO:0005634);; Biological Process: regulation of transcription, DNA-templated (GO:0006355);; Molecular Function: sequence-specific DNA binding (GO:0043565);;	K09419|0|mus:103979701|(RefSeq) heat stress transcription factor C-1b-like; K09419 heat shock transcription factor, other eukaryote	[K]	Transcription	HSF-type DNA-binding	Heat stress transcription factor C-1a OS=Oryza sativa subsp. japonica OX=39947 GN=HSFC1A PE=2 SV=2	Uncharacterized protein OS=Musa acuminata subsp. malaccensis OX=214687 GN=103979701 PE=3 SV=1	PREDICTED: heat stress transcription factor C-1b-like [Musa acuminata subsp. malaccensis]
Macma4_07_g28040	[RTKL]	--	Molecular Function: kinase activity (GO:0016301);;	K16224|0|eus:EUTSA_v10023115mg|(RefSeq) hypothetical protein; K16224 senescence-induced receptor-like serine/threonine-protein kinase	--	--	Malectin-like domain;; Protein tyrosine and serine/threonine kinase;; Protein kinase domain;; Leucine rich repeat;; Leucine Rich repeats (2 copies);; Leucine Rich Repeat	Putative leucine-rich repeat receptor-like protein kinase At2g19210 OS=Arabidopsis thaliana OX=3702 GN=At2g19210 PE=1 SV=1	Protein kinase, putative OS=Musa balbisiana OX=52838 GN=MBP_91N22.18 PE=4 SV=1	unnamed protein product, partial [Musa acuminata subsp. malaccensis]
Macma4_02_g03150	[L]	Replication, recombination and repair	--	K10846|2.46137e-60|mus:104000066|(RefSeq) DNA repair protein UVH3 isoform X1; K10846 DNA excision repair protein ERCC-5	[L]	Replication, recombination and repair	XPG N-terminal domain	DNA repair protein UVH3 OS=Arabidopsis thaliana OX=3702 GN=UVH3 PE=2 SV=1	Uncharacterized protein OS=Musa acuminata subsp. malaccensis OX=214687 PE=4 SV=1	unnamed protein product [Musa acuminata subsp. malaccensis]
Macma4_02_g21520	--	--	--	--	--	--	--	--	--	hypothetical protein C4D60_Mb02t18700 [Musa balbisiana]
Macma4_09_g25270	--	--	--	--	--	--	--	--	Uncharacterized protein OS=Ensete ventricosum OX=4639 GN=GW17_00038645 PE=4 SV=1	hypothetical protein GW17_00038645 [Ensete ventricosum]
Macma4_04_g09520	--	--	--	--	--	--	--	--	--	hypothetical protein C4D60_Mb04t08870 [Musa balbisiana]
Macma4_11_g21180	[R]	General function prediction only	--	K09553|0|mus:103972077|(RefSeq) hsp70-Hsp90 organizing protein; K09553 stress-induced-phosphoprotein 1	[O]	Posttranslational modification, protein turnover, chaperones	Tetratricopeptide repeat;; Tetratricopeptide repeat;; STI1 domain;; TPR repeat;; Tetratricopeptide repeat;; Tetratricopeptide repeat;; Tetratricopeptide repeat;; Tetratricopeptide repeat;; Tetratricopeptide repeat;; Tetratricopeptide repeat;; Tetratricopeptide repeat;; Tetratricopeptide repeat;; Tetratricopeptide repeat	Hsp70-Hsp90 organizing protein OS=Triticum aestivum OX=4565 GN=HOP PE=1 SV=1	Uncharacterized protein OS=Musa acuminata subsp. malaccensis OX=214687 PE=4 SV=1	hypothetical protein C4D60_Mb11t19490 [Musa balbisiana]
Macma4_09_g22400	--	--	--	K18195|0|mus:103998532|(RefSeq) probable rhamnogalacturonate lyase B isoform X1; K18195 rhamnogalacturonan endolyase [EC:4.2.2.23]	--	--	Polysaccharide lyase family 4, domain III;; Rhamnogalacturonate lyase family;; Polysaccharide lyase family 4, domain II;; Rhamnogalacturonate lyase family	Probable rhamnogalacturonate lyase B OS=Aspergillus niger (strain CBS 513.88 / FGSC A1513) OX=425011 GN=rglB PE=3 SV=1	probable rhamnogalacturonate lyase B OS=Phoenix dactylifera OX=42345 GN=LOC103701115 PE=4 SV=1	unnamed protein product [Musa acuminata subsp. malaccensis]
Macma4_01_g11300	--	--	--	--	--	--	--	--	Uncharacterized protein OS=Ensete ventricosum OX=4639 GN=B296_00041584 PE=4 SV=1	PREDICTED: uncharacterized protein LOC108953017 [Musa acuminata subsp. malaccensis]
Macma4_01_g00280	--	--	--	K10908|1.69783e-140|pda:103702397|(RefSeq) DNA-directed RNA polymerase 1B, mitochondrial-like; K10908 DNA-directed RNA polymerase, mitochondrial [EC:2.7.7.6]	[KL]	--	DNA-directed RNA polymerase N-terminal;; DNA-directed RNA polymerase N-terminal	DNA-directed RNA polymerase 2, chloroplastic/mitochondrial OS=Nicotiana sylvestris OX=4096 GN=RPOT2 PE=2 SV=2	Uncharacterized protein OS=Musa acuminata subsp. malaccensis OX=214687 PE=4 SV=1	hypothetical protein C4D60_Mb03t22520 [Musa balbisiana]
Macma4_10_g11260	--	--	--	--	--	--	--	--	Uncharacterized protein OS=Musa acuminata subsp. malaccensis OX=214687 PE=4 SV=1	unnamed protein product [Musa acuminata subsp. malaccensis]
Macma4_11_g24370	--	--	--	--	--	--	--	--	--	hypothetical protein C4D60_Mb11t22470 [Musa balbisiana]
Macma4_11_g12640	[GEPR]	--	--	K08145|1.04375e-06|cit:102613177|(RefSeq) sugar transporter ERD6-like 7; K08145 MFS transporter, SP family, solute carrier family 2 (facilitated glucose transporter), member 8	[R]	General function prediction only	Sugar (and other) transporter	Sugar transport protein MST6 OS=Oryza sativa subsp. japonica OX=39947 GN=MST6 PE=1 SV=1	Uncharacterized protein OS=Musa acuminata subsp. malaccensis OX=214687 PE=4 SV=1	unnamed protein product [Musa acuminata subsp. malaccensis]
Macma4_11_g01520	--	--	--	--	--	--	--	--	Uncharacterized protein OS=Musa acuminata subsp. malaccensis OX=214687 PE=4 SV=1	unnamed protein product [Musa acuminata subsp. malaccensis]
Macma4_08_g11980	[R]	General function prediction only	Molecular Function: metal ion binding (GO:0046872);; Molecular Function: dioxygenase activity (GO:0051213);; Biological Process: oxidation-reduction process (GO:0055114);;	K00475|1.14866e-75|mdm:103436139|(RefSeq) naringenin,2-oxoglutarate 3-dioxygenase-like; K00475 naringenin 3-dioxygenase [EC:1.14.11.9]	[QR]	--	2OG-Fe(II) oxygenase superfamily;; non-haem dioxygenase in morphine synthesis N-terminal	Flavanone 3-dioxygenase 2 OS=Oryza sativa subsp. japonica OX=39947 GN=F3H-2 PE=1 SV=1	Uncharacterized protein OS=Musa acuminata subsp. malaccensis OX=214687 GN=103993175 PE=3 SV=1	PREDICTED: protein DOWNY MILDEW RESISTANCE 6 [Musa acuminata subsp. malaccensis]
Macma4_04_g15650	--	--	--	K16903|2.15752e-16|sita:101785211|(RefSeq) uncharacterized protein LOC101785211; K16903 L-tryptophan---pyruvate aminotransferase [EC:2.6.1.99]	--	--	UBA-like domain (DUF1421)	--	Uncharacterized protein OS=Musa acuminata subsp. malaccensis OX=214687 PE=4 SV=1	PREDICTED: pinin-like isoform X2 [Musa acuminata subsp. malaccensis]
Macma4_03_g11680	--	--	--	K12663|1.27121e-08|aip:107640222|(RefSeq) delta(3,5)-Delta(2,4)-dienoyl-CoA isomerase, peroxisomal-like; K12663 Delta3,5-Delta2,4-dienoyl-CoA isomerase [EC:5.3.3.21]	--	--	Subtilase family	Subtilisin-like protease SBT3.9 OS=Arabidopsis thaliana OX=3702 GN=SBT3.9 PE=3 SV=1	Uncharacterized protein (Fragment) OS=Ensete ventricosum OX=4639 GN=B296_00036136 PE=4 SV=1	PREDICTED: subtilisin-like protease SBT3.5, partial [Musa acuminata subsp. malaccensis]
Macma4_04_g34410	--	--	--	--	--	--	Pollen protein Ole e 1 like	Proline-rich protein 4 OS=Arabidopsis thaliana OX=3702 GN=PRP4 PE=2 SV=1	Uncharacterized protein OS=Ensete ventricosum OX=4639 GN=B296_00059024 PE=4 SV=1	unnamed protein product, partial [Musa acuminata subsp. malaccensis]
Macma4_07_g00870	--	--	--	K14709|0|mus:103975180|(RefSeq) fe(2+) transport protein 1-like; K14709 solute carrier family 39 (zinc transporter), member 1/2/3	[P]	Inorganic ion transport and metabolism	ZIP Zinc transporter	Fe(2+) transport protein 1 OS=Oryza sativa subsp. japonica OX=39947 GN=IRT1 PE=2 SV=1	Uncharacterized protein OS=Musa acuminata subsp. malaccensis OX=214687 PE=3 SV=1	PREDICTED: fe(2+) transport protein 1-like [Musa acuminata subsp. malaccensis]
Macma4_04_g32030	[RTKL]	--	--	K04733|5.60782e-174|bna:106384123|(RefSeq) LRR receptor-like serine/threonine-protein kinase RPK2	--	--	Protein kinase domain;; Protein tyrosine and serine/threonine kinase;; Leucine rich repeat;; Leucine Rich repeats (2 copies);; Leucine Rich Repeat;; Leucine rich repeat N-terminal domain;; Leucine Rich repeat	LRR receptor-like serine/threonine-protein kinase RPK2 OS=Arabidopsis thaliana OX=3702 GN=RPK2 PE=1 SV=1	Uncharacterized protein OS=Ensete ventricosum OX=4639 GN=B296_00005273 PE=3 SV=1	PREDICTED: LRR receptor-like serine/threonine-protein kinase RPK2 [Musa acuminata subsp. malaccensis]
Macma4_09_g11510	--	--	--	K05609|2.37547e-40|thj:104813337|(RefSeq) ubiquitin carboxyl-terminal hydrolase 3; K05609 ubiquitin carboxyl-terminal hydrolase L3 [EC:3.4.19.12]	--	--	Neprosin;; Neprosin activation peptide	--	Uncharacterized protein OS=Musa acuminata subsp. malaccensis OX=214687 PE=4 SV=1	PREDICTED: uncharacterized protein LOC103997606 [Musa acuminata subsp. malaccensis]
Macma4_03_g28630	--	--	Molecular Function: magnesium ion transmembrane transporter activity (GO:0015095);; Biological Process: magnesium ion transport (GO:0015693);; Cellular Component: integral component of membrane (GO:0016021);; Biological Process: magnesium ion transmembrane transport (GO:1903830);;	--	--	--	EamA-like transporter family	Probable magnesium transporter NIPA9 OS=Arabidopsis thaliana OX=3702 GN=At5g11960 PE=2 SV=1	Probable magnesium transporter OS=Musa acuminata subsp. malaccensis OX=214687 GN=103978781 PE=3 SV=1	PREDICTED: probable magnesium transporter NIPA9 [Musa acuminata subsp. malaccensis]
Macma4_01_g09760	[C]	Energy production and conversion	Molecular Function: succinate-CoA ligase (ADP-forming) activity (GO:0004775);; Molecular Function: ATP binding (GO:0005524);;	K01648|0|mus:103984457|(RefSeq) ATP-citrate synthase alpha chain protein 2; K01648 ATP citrate (pro-S)-lyase [EC:2.3.3.8]	[C]	Energy production and conversion	ATP citrate lyase citrate-binding;; ATP-grasp domain	ATP-citrate synthase alpha chain protein 2 OS=Oryza sativa subsp. japonica OX=39947 GN=ACLA-2 PE=2 SV=2	Uncharacterized protein OS=Musa acuminata subsp. malaccensis OX=214687 GN=103984457 PE=4 SV=1	hypothetical protein C4D60_Mb01t18900 [Musa balbisiana]
Macma4_Mt_g00670	--	--	Molecular Function: proton transmembrane transporter activity (GO:0015078);; Biological Process: ATP synthesis coupled proton transport (GO:0015986);; Cellular Component: integral component of membrane (GO:0016021);; Cellular Component: mitochondrial membrane (GO:0031966);; Cellular Component: proton-transporting ATP synthase complex, coupling factor F(o) (GO:0045263);;	--	--	--	Mitochondrial ATP synthase B chain precursor (ATP-synt_B)	ATP synthase protein MI25 OS=Triticum aestivum OX=4565 PE=3 SV=1	ATPase subunit 4 OS=Cocos nucifera OX=13894 GN=atp4 PE=4 SV=1	ATPase subunit 4 [Musa acuminata subsp. microcarpa]
Macma4_07_g12670	--	--	--	K14299|7.66448e-15|mdm:103418195|(RefSeq) protein SEH1-like; K14299 nucleoporin SEH1	--	--	Phosphate-induced protein 1 conserved region	Protein PHOSPHATE-INDUCED 1 homolog OS=Oryza sativa subsp. japonica OX=39947 GN=PHI-1 PE=2 SV=1	Uncharacterized protein OS=Ensete ventricosum OX=4639 GN=B296_00018698 PE=4 SV=1	PREDICTED: protein EXORDIUM-like [Musa acuminata subsp. malaccensis]
Macma4_04_g40430	--	--	--	K11548|0|mus:103983315|(RefSeq) LOW QUALITY PROTEIN: kinetochore protein Nuf2-like; K11548 kinetochore protein Nuf2	[D]	Cell cycle control, cell division, chromosome partitioning	--	Kinetochore protein NUF2 homolog OS=Arabidopsis thaliana OX=3702 GN=NUF2 PE=1 SV=1	kinetochore protein NUF2 homolog OS=Phoenix dactylifera OX=42345 GN=LOC103710592 PE=4 SV=1	PREDICTED: LOW QUALITY PROTEIN: kinetochore protein Nuf2-like [Musa acuminata subsp. malaccensis]
Macma4_02_g13100	[F]	Nucleotide transport and metabolism	Molecular Function: uridine kinase activity (GO:0004849);; Molecular Function: ATP binding (GO:0005524);; Cellular Component: cytosol (GO:0005829);; Biological Process: carbohydrate metabolic process (GO:0005975);; Biological Process: pyrimidine nucleobase metabolic process (GO:0006206);; Biological Process: UMP biosynthetic process (GO:0006222);; Molecular Function: phosphoribulokinase activity …	K00855|2.3322e-47|egu:105053805|(RefSeq) phosphoribulokinase, chloroplastic-like; K00855 phosphoribulokinase [EC:2.7.1.19]	[TZ]	--	Phosphoribulokinase / Uridine kinase family	Phosphoribulokinase, chloroplastic OS=Triticum aestivum OX=4565 PE=2 SV=1	Uncharacterized protein OS=Musa acuminata subsp. malaccensis OX=214687 PE=4 SV=1	unnamed protein product [Musa acuminata subsp. malaccensis]
Macma4_04_g41410	--	--	--	K13944|3.65561e-07|pda:103710399|(RefSeq) LOB domain-containing protein 16-like; K13944 LOB domain-containing protein 16	--	--	Lateral organ boundaries (LOB) domain	LOB domain-containing protein 37 OS=Arabidopsis thaliana OX=3702 GN=LBD37 PE=2 SV=1	Uncharacterized protein OS=Musa acuminata subsp. malaccensis OX=214687 GN=103982174 PE=4 SV=1	PREDICTED: LOB domain-containing protein 37-like [Musa acuminata subsp. malaccensis]
Macma4_04_g16790	--	--	--	K00430|5.01886e-149|mus:103973017|(RefSeq) peroxidase 5-like; K00430 peroxidase [EC:1.11.1.7]	[R]	General function prediction only	PPR repeat;; PPR repeat family;; PPR repeat;; Pentatricopeptide repeat domain;; Pentacotripeptide-repeat region of PRORP;; Peroxidase	Pentatricopeptide repeat-containing protein At3g29230 OS=Arabidopsis thaliana OX=3702 GN=PCMP-E27 PE=2 SV=1	Uncharacterized protein OS=Ensete ventricosum OX=4639 GN=GW17_00035910 PE=4 SV=1	PREDICTED: pentatricopeptide repeat-containing protein At3g29230-like [Musa acuminata subsp. malaccensis]
Macma4_06_g24350	[J]	Translation, ribosomal structure and biogenesis	Molecular Function: structural constituent of ribosome (GO:0003735);; Cellular Component: ribosome (GO:0005840);; Biological Process: translation (GO:0006412);;	K02949|9.19011e-101|mus:103988793|(RefSeq) 40S ribosomal protein S11-like; K02949 small subunit ribosomal protein S11e	[J]	Translation, ribosomal structure and biogenesis	Ribosomal_S17 N-terminal;; Ribosomal protein S17	40S ribosomal protein S11 OS=Euphorbia esula OX=3993 GN=RPS11 PE=2 SV=1	Uncharacterized protein OS=Musa acuminata subsp. malaccensis OX=214687 PE=4 SV=1	unnamed protein product [Musa acuminata subsp. malaccensis]
Macma4_05_g28710	--	--	Biological Process: positive regulation of stomatal complex development (GO:2000123);;	--	--	--	--	EPIDERMAL PATTERNING FACTOR-like protein 9 OS=Arabidopsis thaliana OX=3702 GN=EPFL9 PE=1 SV=1	Uncharacterized protein OS=Ensete ventricosum OX=4639 GN=GW17_00043125 PE=4 SV=1	PREDICTED: uncharacterized protein LOC108952874 [Musa acuminata subsp. malaccensis]
Macma4_01_g07840	[P]	Inorganic ion transport and metabolism	Molecular Function: carbonate dehydratase activity (GO:0004089);; Molecular Function: zinc ion binding (GO:0008270);; Biological Process: carbon utilization (GO:0015976);;	K01673|4.00276e-150|mus:103986302|(RefSeq) beta carbonic anhydrase 2, chloroplastic-like; K01673 carbonic anhydrase [EC:4.2.1.1]	[P]	Inorganic ion transport and metabolism	Carbonic anhydrase	Beta carbonic anhydrase 2, chloroplastic OS=Arabidopsis thaliana OX=3702 GN=BCA2 PE=1 SV=3	Carbonic anhydrase OS=Musa acuminata subsp. malaccensis OX=214687 GN=103986302 PE=3 SV=1	PREDICTED: beta carbonic anhydrase 2, chloroplastic-like [Musa acuminata subsp. malaccensis]
Macma4_08_g03430	--	--	--	--	--	--	Protein of unknown function (DUF1084)	Tobamovirus multiplication protein 1 OS=Nicotiana tabacum OX=4097 GN=TOM1 PE=1 SV=1	Uncharacterized protein OS=Musa acuminata subsp. malaccensis OX=214687 PE=4 SV=1	PREDICTED: tobamovirus multiplication protein 1-like [Musa acuminata subsp. malaccensis]
Macma4_07_g06160	--	--	--	K00592|4.441e-13|egr:104453926|(RefSeq) ribulose-1,5 bisphosphate carboxylase/oxygenase large subunit N-methyltransferase, chloroplastic; K00592 [ribulose-bisphosphate carboxylase]/[fructose-bisphosphate aldolase]-lysine N-methyltransferase [EC:2.1.1.259]	[R]	General function prediction only	SET domain	[Fructose-bisphosphate aldolase]-lysine N-methyltransferase, chloroplastic OS=Arabidopsis thaliana OX=3702 GN=LSMT-L PE=1 SV=1	Uncharacterized protein OS=Musa acuminata subsp. malaccensis OX=214687 PE=4 SV=1	PREDICTED: histone-lysine N-methyltransferase setd3 isoform X1 [Musa acuminata subsp. malaccensis]
Macma4_05_g28620	[RTKL]	--	--	K13415|7.01899e-170|cit:102629976|(RefSeq) protein BRASSINOSTEROID INSENSITIVE 1; K13415 protein brassinosteroid insensitive 1 [EC:2.7.11.1]	--	--	Leucine rich repeat;; Leucine Rich repeats (2 copies);; Protein tyrosine and serine/threonine kinase;; Protein kinase domain;; Leucine Rich Repeat;; FNIP Repeat;; Leucine rich repeat N-terminal domain;; Leucine Rich repeat	Leucine-rich repeat receptor protein kinase MSP1 OS=Oryza sativa subsp. japonica OX=39947 GN=MSP1 PE=1 SV=1	Uncharacterized protein OS=Ensete ventricosum OX=4639 GN=B296_00055905 PE=3 SV=1	PREDICTED: leucine-rich repeat receptor protein kinase MSP1-like [Musa acuminata subsp. malaccensis]
Macma4_06_g34130	[KAD]	--	Molecular Function: DNA binding (GO:0003677);;	K09422|0|mus:103989521|(RefSeq) transcription factor MYB36-like; K09422 transcription factor MYB, plant	[K]	Transcription	Myb-like DNA-binding domain;; Myb-like DNA-binding domain	Transcription factor MYB36 OS=Arabidopsis thaliana OX=3702 GN=MYB36 PE=1 SV=1	Uncharacterized protein OS=Musa acuminata subsp. malaccensis OX=214687 GN=103989521 PE=4 SV=1	PREDICTED: transcription factor MYB36-like [Musa acuminata subsp. malaccensis]
Macma4_01_g26220	--	--	--	K09286|2.16589e-23|aly:ARALYDRAFT_474196|(RefSeq) ATERF3/ERF3; K09286 EREBP-like factor	--	--	AP2 domain	Ethylene-responsive transcription factor 9 OS=Arabidopsis thaliana OX=3702 GN=ERF9 PE=1 SV=1	Uncharacterized protein OS=Ensete ventricosum OX=4639 GN=GW17_00054313 PE=4 SV=1	PREDICTED: ethylene-responsive transcription factor 8-like [Musa acuminata subsp. malaccensis]
Macma4_01_g21370	[Q]	Secondary metabolites biosynthesis, transport and catabolism	--	K20624|0|eus:EUTSA_v10016556mg|(RefSeq) hypothetical protein; K20624 12-hydroxyjasmonoyl-L-amino acid 12-hydroxylase / fatty acid hydroxylase [EC:1.14.14.49]	[QI]	--	Cytochrome P450	Cytochrome P450 94C1 OS=Arabidopsis thaliana OX=3702 GN=CYP94C1 PE=1 SV=1	Uncharacterized protein OS=Ensete ventricosum OX=4639 GN=B296_00036500 PE=4 SV=1	hypothetical protein C4D60_Mb01t29390 [Musa balbisiana]
Macma4_Mt_g01250	--	--	--	--	--	--	--	--	Uncharacterized protein (Fragment) OS=Mucuna pruriens OX=157652 GN=CR513_00087 PE=4 SV=1	hypothetical protein C4D60_Mb00t00060 [Musa balbisiana]
Macma4_08_g19350	--	--	--	--	--	--	--	--	Uncharacterized protein OS=Musa acuminata subsp. malaccensis OX=214687 GN=103994786 PE=4 SV=1	PREDICTED: uncharacterized protein LOC103994786 isoform X1 [Musa acuminata subsp. malaccensis]
Macma4_03_g04960	[B]	Chromatin structure and dynamics	Cellular Component: nucleosome (GO:0000786);; Molecular Function: DNA binding (GO:0003677);; Cellular Component: nucleus (GO:0005634);; Biological Process: nucleosome assembly (GO:0006334);; Molecular Function: protein heterodimerization activity (GO:0046982);;	K11254|1.15173e-51|zma:103634846|(RefSeq) histone H4; K11254 histone H4	[B]	Chromatin structure and dynamics	Centromere kinetochore component CENP-T histone fold;; TATA box binding protein associated factor (TAF)	Histone H4 OS=Glycine max OX=3847 PE=3 SV=1	Histone H4 OS=Hordeum vulgare subsp. vulgare OX=112509 PE=3 SV=1	hypothetical protein BHM03_00026466 [Ensete ventricosum]
XLOC_004968	--	--	Molecular Function: D-arabinono-1,4-lactone oxidase activity (GO:0003885);; Cellular Component: membrane (GO:0016020);; Molecular Function: flavin adenine dinucleotide binding (GO:0050660);; Biological Process: oxidation-reduction process (GO:0055114);;	--	[V]	Defense mechanisms	D-arabinono-1,4-lactone oxidase	L-gulonolactone oxidase 2 OS=Arabidopsis thaliana OX=3702 GN=GULLO2 PE=1 SV=1	--	PREDICTED: L-gulonolactone oxidase 2-like isoform X2 [Musa acuminata subsp. malaccensis]
Macma4_02_g06850	--	--	Molecular Function: cellulase activity (GO:0008810);; Biological Process: cellulose catabolic process (GO:0030245);;	K01179|0|mus:103971046|(RefSeq) endoglucanase 23-like; K01179 endoglucanase [EC:3.2.1.4]	--	--	Glycosyl hydrolase family 9	Endoglucanase 23 OS=Oryza sativa subsp. japonica OX=39947 GN=GLU12 PE=2 SV=1	Endoglucanase OS=Musa acuminata subsp. malaccensis OX=214687 PE=3 SV=1	PREDICTED: endoglucanase 23-like [Musa acuminata subsp. malaccensis]
Macma4_02_g02000	--	--	--	K11982|8.01584e-10|smo:SELMODRAFT_7748|(RefSeq) hypothetical protein	[O]	Posttranslational modification, protein turnover, chaperones	Ring finger domain;; Zinc finger, C3HC4 type (RING finger);; RING-like zinc finger;; RING-H2 zinc finger domain;; RING-type zinc-finger;; Zinc finger, C3HC4 type (RING finger);; Anaphase-promoting complex subunit 11 RING-H2 finger	RING-H2 finger protein ATL39 OS=Arabidopsis thaliana OX=3702 GN=ATL39 PE=2 SV=1	Uncharacterized protein OS=Ensete ventricosum OX=4639 GN=GW17_00041358 PE=4 SV=1	hypothetical protein C4D60_Mb02t00860 [Musa balbisiana]
Macma4_04_g34980	--	--	Molecular Function: ADP binding (GO:0043531);;	K15078|9.67509e-168|nnu:104613421|(RefSeq) putative disease resistance protein RGA3; K15078 structure-specific endonuclease subunit SLX1 [EC:3.6.1.-]	[T]	Signal transduction mechanisms	NB-ARC domain;; Rx N-terminal domain;; Leucine Rich repeats (2 copies);; Leucine rich repeat	Putative disease resistance protein RGA3 OS=Solanum bulbocastanum OX=147425 GN=RGA3 PE=2 SV=2	Uncharacterized protein OS=Musa acuminata subsp. malaccensis OX=214687 GN=103982677 PE=3 SV=1	unnamed protein product [Musa acuminata subsp. malaccensis]
Macma4_10_g23060	[G]	Carbohydrate transport and metabolism	Molecular Function: trehalose-phosphatase activity (GO:0004805);; Biological Process: trehalose biosynthetic process (GO:0005992);; Biological Process: dephosphorylation (GO:0016311);;	K01087|0|mus:103968641|(RefSeq) probable trehalose-phosphate phosphatase 6; K01087 trehalose 6-phosphate phosphatase [EC:3.1.3.12]	[G]	Carbohydrate transport and metabolism	Trehalose-phosphatase	Probable trehalose-phosphate phosphatase 6 OS=Oryza sativa subsp. japonica OX=39947 GN=TPP6 PE=2 SV=1	Trehalose 6-phosphate phosphatase OS=Musa acuminata subsp. malaccensis OX=214687 PE=3 SV=1	PREDICTED: probable trehalose-phosphate phosphatase 6 [Musa acuminata subsp. malaccensis]
Macma4_01_g05380	[R]	General function prediction only	Cellular Component: membrane (GO:0016020);; Molecular Function: hydrolase activity (GO:0016787);;	--	[R]	General function prediction only	Calcineurin-like phosphoesterase	Probable inactive purple acid phosphatase 16 OS=Arabidopsis thaliana OX=3702 GN=PAP16 PE=2 SV=1	Uncharacterized protein OS=Musa acuminata subsp. malaccensis OX=214687 PE=4 SV=1	PREDICTED: probable inactive purple acid phosphatase 16 [Musa acuminata subsp. malaccensis]
Macma4_05_g10380	[R]	General function prediction only	Biological Process: metabolic process (GO:0008152);; Molecular Function: hydrolase activity (GO:0016787);;	K14664|0|mus:103984659|(RefSeq) IAA-amino acid hydrolase ILR1-like 5; K14664 IAA-amino acid hydrolase [EC:3.5.1.-]	--	--	Peptidase family M20/M25/M40	IAA-amino acid hydrolase ILR1-like 5 OS=Oryza sativa subsp. japonica OX=39947 GN=ILL5 PE=2 SV=1	IAA-amino acid hydrolase ILR1-like 5 OS=Phoenix dactylifera OX=42345 GN=LOC103702770 PE=4 SV=1	PREDICTED: IAA-amino acid hydrolase ILR1-like 5 [Musa acuminata subsp. malaccensis]
Macma4_09_g01090	--	--	Molecular Function: protein tyrosine phosphatase activity (GO:0004725);; Biological Process: peptidyl-tyrosine dephosphorylation (GO:0035335);;	K18081|0|mus:103996633|(RefSeq) phosphatidylinositol-3-phosphatase myotubularin-1; K18081 myotubularin-related protein 1/2 [EC:3.1.3.95]	[IU]	--	Myotubularin-like phosphatase domain;; POT family	Phosphatidylinositol-3-phosphatase myotubularin-1 OS=Arabidopsis thaliana OX=3702 GN=MTM1 PE=1 SV=1	Uncharacterized protein OS=Musa acuminata subsp. malaccensis OX=214687 GN=103996633 PE=4 SV=1	PREDICTED: phosphatidylinositol-3-phosphatase myotubularin-1 [Musa acuminata subsp. malaccensis]
Macma4_04_g02650	--	--	--	K03239|2.08095e-14|ath:AT1G53900|(RefSeq) Eukaryotic translation initiation factor 2B (eIF-2B) family protein; K03239 translation initiation factor eIF-2B subunit alpha	--	--	LURP-one-related	Protein LURP-one-related 8 OS=Arabidopsis thaliana OX=3702 GN=At2g38640 PE=2 SV=1	Uncharacterized protein OS=Musa acuminata subsp. malaccensis OX=214687 GN=103980508 PE=4 SV=1	hypothetical protein C4D60_Mb04t02370 [Musa balbisiana]
Macma4_02_g15780	[G]	Carbohydrate transport and metabolism	--	--	[G]	Carbohydrate transport and metabolism	Histidine phosphatase superfamily (branch 1)	Phosphoglycerate mutase-like protein 1 OS=Arabidopsis thaliana OX=3702 GN=At5g64460 PE=2 SV=1	Uncharacterized protein OS=Musa acuminata subsp. malaccensis OX=214687 PE=4 SV=1	PREDICTED: phosphoglycerate mutase-like protein 1 isoform X1 [Musa acuminata subsp. malaccensis]
Macma4_04_g16550	--	--	--	K10863|2.58296e-09|thj:104816650|(RefSeq) transcription factor bHLH140; K10863 aprataxin [EC:3.1.12.2]	--	--	Helix-loop-helix DNA-binding domain	Transcription factor bHLH87 OS=Arabidopsis thaliana OX=3702 GN=BHLH87 PE=1 SV=1	Uncharacterized protein OS=Ensete ventricosum OX=4639 GN=B296_00010574 PE=4 SV=1	PREDICTED: transcription factor bHLH87-like [Musa acuminata subsp. malaccensis]
Macma4_10_g03680	--	--	--	--	--	--	--	--	Uncharacterized protein OS=Musa acuminata subsp. malaccensis OX=214687 PE=4 SV=1	hypothetical protein C4D60_Mb01t29800 [Musa balbisiana]
Macma4_10_g20540	--	--	--	K20285|3.27246e-19|adu:107465194|(RefSeq) uncharacterized protein LOC107465194 isoform X1; K20285 Rab9 effector protein with kelch motifs	[R]	General function prediction only	Galactose oxidase, central domain;; Galactose oxidase, central domain;; Kelch motif;; Kelch motif;; Domain of unknown function (DUF4110);; Kelch motif;; Kelch motif	Kelch domain-containing protein 4 OS=Mus musculus OX=10090 GN=Klhdc4 PE=2 SV=2	kelch domain-containing protein 4 OS=Phoenix dactylifera OX=42345 GN=LOC103719647 PE=4 SV=1	PREDICTED: kelch domain-containing protein 4 [Musa acuminata subsp. malaccensis]
Macma4_09_g15850	[KAD]	--	--	K09422|0|mus:103998156|(RefSeq) protein ODORANT1-like; K09422 transcription factor MYB, plant	[K]	Transcription	Myb-like DNA-binding domain;; Myb-like DNA-binding domain	Transcription factor MYB20 OS=Arabidopsis thaliana OX=3702 GN=MYB20 PE=2 SV=1	Uncharacterized protein OS=Musa acuminata subsp. malaccensis OX=214687 PE=4 SV=1	PREDICTED: protein ODORANT1-like [Musa acuminata subsp. malaccensis]
Macma4_07_g12190	--	--	--	--	--	--	Transcriptional repressor, ovate	Probable transcription repressor OFP9 OS=Arabidopsis thaliana OX=3702 GN=OFP9 PE=3 SV=2	Uncharacterized protein OS=Musa acuminata subsp. malaccensis OX=214687 GN=103991839 PE=4 SV=1	PREDICTED: probable transcription repressor OFP9 [Musa acuminata subsp. malaccensis]
Macma4_01_g17170	--	--	--	K15115|0|mus:103990073|(RefSeq) nicotinamide adenine dinucleotide transporter 1, chloroplastic-like; K15115 solute carrier family 25 (mitochondrial folate transporter), member 32	[C]	Energy production and conversion	Mitochondrial carrier protein	Nicotinamide adenine dinucleotide transporter 1, chloroplastic OS=Arabidopsis thaliana OX=3702 GN=NDT1 PE=1 SV=2	nicotinamide adenine dinucleotide transporter 2, mitochondrial-like OS=Phoenix dactylifera OX=42345 GN=LOC103712777 PE=3 SV=1	PREDICTED: nicotinamide adenine dinucleotide transporter 1, chloroplastic-like [Musa acuminata subsp. malaccensis]
XLOC_009294	--	--	Molecular Function: ADP binding (GO:0043531);;	K13457|2.62481e-29|sita:101755959|(RefSeq) disease resistance protein RPM1; K13457 disease resistance protein RPM1	[T]	Signal transduction mechanisms	NB-ARC domain;; NB-ARC domain	Putative disease resistance protein RGA3 OS=Solanum bulbocastanum OX=147425 GN=RGA3 PE=2 SV=2	--	unnamed protein product [Musa acuminata subsp. malaccensis]
Macma4_06_g14220	--	--	--	--	--	--	--	--	Uncharacterized protein OS=Musa acuminata subsp. malaccensis OX=214687 PE=4 SV=1	unnamed protein product [Musa acuminata subsp. malaccensis]
Macma4_02_g14380	--	--	Biological Process: killing of cells of other organism (GO:0031640);; Biological Process: defense response to fungus (GO:0050832);;	--	--	--	Gamma-thionin family	Defensin-like protein OS=Petunia integrifolia OX=4103 PE=2 SV=1	Uncharacterized protein OS=Musa acuminata subsp. malaccensis OX=214687 GN=103975838 PE=3 SV=1	PREDICTED: defensin Tk-AMP-D2-like [Musa acuminata subsp. malaccensis]
Macma4_02_g03110	--	--	--	--	[S]	Function unknown	--	ARM REPEAT PROTEIN INTERACTING WITH ABF2 OS=Arabidopsis thaliana OX=3702 GN=ARIA PE=1 SV=2	Uncharacterized protein OS=Musa acuminata subsp. malaccensis OX=214687 PE=4 SV=1	unnamed protein product [Musa acuminata subsp. malaccensis]
Macma4_10_g29370	[C]	Energy production and conversion	Biological Process: carbohydrate metabolic process (GO:0005975);; Biological Process: malate metabolic process (GO:0006108);; Molecular Function: L-malate dehydrogenase activity (GO:0030060);; Biological Process: oxidation-reduction process (GO:0055114);;	K00026|0|mus:103969233|(RefSeq) malate dehydrogenase, chloroplastic-like; K00026 malate dehydrogenase [EC:1.1.1.37]	[C]	Energy production and conversion	lactate/malate dehydrogenase, NAD binding domain;; lactate/malate dehydrogenase, alpha/beta C-terminal domain;; 3-beta hydroxysteroid dehydrogenase/isomerase family	Malate dehydrogenase, chloroplastic OS=Arabidopsis thaliana OX=3702 GN=At3g47520 PE=1 SV=1	Uncharacterized protein OS=Ensete ventricosum OX=4639 GN=B296_00000021 PE=4 SV=1	PREDICTED: malate dehydrogenase, chloroplastic-like [Musa acuminata subsp. malaccensis]
Macma4_06_g04980	--	--	--	K17479|0|mus:103986836|(RefSeq) uncharacterized protein At3g28850-like; K17479 glutaredoxin domain-containing cysteine-rich protein 1	[O]	Posttranslational modification, protein turnover, chaperones	Glutaredoxin	Uncharacterized protein At5g39865 OS=Arabidopsis thaliana OX=3702 GN=At5g39865 PE=2 SV=1	Uncharacterized protein OS=Ensete ventricosum OX=4639 GN=B296_00030165 PE=4 SV=1	PREDICTED: uncharacterized protein At3g28850-like [Musa acuminata subsp. malaccensis]
Macma4_06_g27780	--	--	--	--	--	--	--	Protein SOB FIVE-LIKE 5 OS=Arabidopsis thaliana OX=3702 GN=SOFL5 PE=2 SV=1	Uncharacterized protein OS=Ensete ventricosum OX=4639 GN=GW17_00043101 PE=4 SV=1	unnamed protein product [Musa acuminata subsp. malaccensis]
Macma4_04_g05770	[V]	Defense mechanisms	Molecular Function: ATP binding (GO:0005524);; Cellular Component: plasma membrane (GO:0005886);; Cellular Component: integral component of membrane (GO:0016021);; Molecular Function: ATPase-coupled transmembrane transporter activity (GO:0042626);; Biological Process: transmembrane transport (GO:0055085);;	K05681|1.62461e-47|cme:CYME_CMS467C|(RefSeq) ATP-binding cassette, sub-family G, member 2; K05681 ATP-binding cassette, subfamily G (WHITE), member 2	[Q]	Secondary metabolites biosynthesis, transport and catabolism	ABC-2 type transporter;; ABC transporter	ABC transporter G family member 28 OS=Arabidopsis thaliana OX=3702 GN=ABCG28 PE=3 SV=1	Uncharacterized protein OS=Musa acuminata subsp. malaccensis OX=214687 PE=4 SV=1	PREDICTED: ABC transporter G family member 28-like [Musa acuminata subsp. malaccensis]
Macma4_06_g09000	--	--	--	K20557|1.01526e-76|mus:103988109|(RefSeq) transcription factor RF2b; K20557 transcription factor VIP1	--	--	--	Transcription factor VIP1 OS=Arabidopsis thaliana OX=3702 GN=VIP1 PE=1 SV=1	Uncharacterized protein OS=Musa acuminata subsp. malaccensis OX=214687 PE=4 SV=1	hypothetical protein C4D60_Mb06t08230 [Musa balbisiana]
Macma4_03_g02410	[O]	Posttranslational modification, protein turnover, chaperones	--	K00573|0|mus:103977101|(RefSeq) protein-L-isoaspartate O-methyltransferase; K00573 protein-L-isoaspartate(D-aspartate) O-methyltransferase [EC:2.1.1.77]	[O]	Posttranslational modification, protein turnover, chaperones	Protein-L-isoaspartate(D-aspartate) O-methyltransferase (PCMT)	Protein-L-isoaspartate O-methyltransferase OS=Triticum aestivum OX=4565 GN=PCM PE=1 SV=1	Protein-L-isoaspartate O-methyltransferase OS=Musa acuminata subsp. malaccensis OX=214687 PE=3 SV=1	PREDICTED: protein-L-isoaspartate O-methyltransferase [Musa acuminata subsp. malaccensis]
Macma4_09_g25650	[R]	General function prediction only	--	K18643|0|mus:103998787|(RefSeq) katanin p80 WD40 repeat-containing subunit B1 homolog isoform X1; K18643 katanin p80 WD40 repeat-containing subunit B1	[D]	Cell cycle control, cell division, chromosome partitioning	con80 domain of Katanin;; WD domain, G-beta repeat;; Anaphase-promoting complex subunit 4 WD40 domain;; Eukaryotic translation initiation factor eIF2A	Katanin p80 WD40 repeat-containing subunit B1 homolog KTN80.4 OS=Arabidopsis thaliana OX=3702 GN=KTN80.4 PE=1 SV=3	Katanin p80 WD40 repeat-containing subunit B1 homolog OS=Musa acuminata subsp. malaccensis OX=214687 PE=3 SV=1	PREDICTED: katanin p80 WD40 repeat-containing subunit B1 homolog isoform X1 [Musa acuminata subsp. malaccensis]
Macma4_04_g24780	--	--	--	--	[P]	Inorganic ion transport and metabolism	Heavy-metal-associated domain	Heavy metal-associated isoprenylated plant protein 5 OS=Arabidopsis thaliana OX=3702 GN=HIPP05 PE=1 SV=2	Uncharacterized protein OS=Musa acuminata subsp. malaccensis OX=214687 PE=4 SV=1	unnamed protein product [Musa acuminata subsp. malaccensis]
Macma4_03_g26260	[C]	Energy production and conversion	--	--	--	--	FAD binding domain;; Berberine and berberine like	Berberine bridge enzyme-like 22 OS=Arabidopsis thaliana OX=3702 GN=FAD-OXR PE=2 SV=1	Uncharacterized protein OS=Ensete ventricosum OX=4639 GN=B296_00040255 PE=3 SV=1	PREDICTED: tetrahydrocannabinolic acid synthase-like [Musa acuminata subsp. malaccensis]
Macma4_04_g17030	[J]	Translation, ribosomal structure and biogenesis	Molecular Function: RNA binding (GO:0003723);; Biological Process: rRNA processing (GO:0006364);; Biological Process: tRNA processing (GO:0008033);; Molecular Function: methyltransferase activity (GO:0008168);; Biological Process: methylation (GO:0032259);;	K14563|2.18624e-59|pda:103710359|(RefSeq) probable mediator of RNA polymerase II transcription subunit 36b isoform X1; K14563 rRNA 2'-O-methyltransferase fibrillarin [EC:2.1.1.-]	[A]	RNA processing and modification	Fibrillarin	rRNA 2'-O-methyltransferase fibrillarin 1 OS=Arabidopsis thaliana OX=3702 GN=FIB1 PE=1 SV=1	Uncharacterized protein OS=Triticum turgidum subsp. durum OX=4567 GN=TRITD_6Av1G221640 PE=4 SV=1	PREDICTED: LOW QUALITY PROTEIN: mediator of RNA polymerase II transcription subunit 36a-like [Musa acuminata subsp. malaccensis]
Macma4_05_g19730	--	--	--	--	--	--	--	--	Uncharacterized protein OS=Musa acuminata subsp. malaccensis OX=214687 PE=4 SV=1	unnamed protein product, partial [Musa acuminata subsp. malaccensis]
Macma4_11_g12890	--	--	--	--	--	--	--	Polyprotein P3 OS=Commelina yellow mottle virus OX=10653 PE=3 SV=2	Uncharacterized protein OS=Musa acuminata subsp. malaccensis OX=214687 PE=4 SV=1	unnamed protein product [Musa acuminata subsp. malaccensis]
Macma4_01_g00580	--	--	Molecular Function: DNA binding (GO:0003677);; Molecular Function: DNA-binding transcription factor activity (GO:0003700);; Cellular Component: nucleus (GO:0005634);; Biological Process: regulation of transcription, DNA-templated (GO:0006355);; Biological Process: multicellular organism development (GO:0007275);;	K09284|0|mus:103981461|(RefSeq) AP2-like ethylene-responsive transcription factor TOE3; K09284 AP2-like factor, euAP2 lineage	--	--	AP2 domain	Floral homeotic protein APETALA 2 OS=Arabidopsis thaliana OX=3702 GN=AP2 PE=1 SV=1	Uncharacterized protein OS=Musa acuminata subsp. malaccensis OX=214687 GN=103981461 PE=4 SV=1	PREDICTED: AP2-like ethylene-responsive transcription factor TOE3 [Musa acuminata subsp. malaccensis]
Macma4_10_g10600	--	--	--	K12135|8.6063e-12|eus:EUTSA_v10015486mg|(RefSeq) hypothetical protein; K12135 zinc finger protein CONSTANS	--	--	CCT motif;; B-box zinc finger	Zinc finger protein CONSTANS-LIKE 14 OS=Arabidopsis thaliana OX=3702 GN=COL14 PE=1 SV=2	Uncharacterized protein OS=Musa acuminata subsp. malaccensis OX=214687 PE=4 SV=1	hypothetical protein C4D60_Mb10t22530 [Musa balbisiana]
Macma4_07_g06990	--	--	Molecular Function: structural constituent of ribosome (GO:0003735);; Cellular Component: mitochondrial small ribosomal subunit (GO:0005763);;	K17413|0|mus:103990431|(RefSeq) uncharacterized protein LOC103990431; K17413 small subunit ribosomal protein S35	--	--	Mitochondrial ribosomal subunit protein	--	Uncharacterized protein OS=Musa acuminata subsp. malaccensis OX=214687 PE=4 SV=1	PREDICTED: uncharacterized protein LOC103990431 [Musa acuminata subsp. malaccensis]
Macma4_09_g01850	--	--	Molecular Function: zinc ion binding (GO:0008270);;	K17987|0|mus:103996721|(RefSeq) protein NBR1 homolog; K17987 next to BRCA1 gene 1 protein	[S]	Function unknown	Ig-like domain from next to BRCA1 gene;; Zinc finger, ZZ type;; PB1 domain	Protein JOKA2 OS=Solanum tuberosum OX=4113 GN=JOKA2 PE=1 SV=1	Uncharacterized protein OS=Musa acuminata subsp. malaccensis OX=214687 GN=103996721 PE=4 SV=1	PREDICTED: protein NBR1 homolog [Musa acuminata subsp. malaccensis]
Macma4_04_g30230	--	--	--	K11714|1.55147e-08|csl:COCSUDRAFT_34634|(RefSeq) hypothetical protein; K11714 rhamnogalacturonan II specific xylosyltransferase [EC:2.4.2.-]	--	--	Nucleotide-diphospho-sugar transferase	Uncharacterized protein At1g28695 OS=Arabidopsis thaliana OX=3702 GN=At1g28695 PE=2 SV=1	Glycosyltransferase OS=Musa acuminata subsp. malaccensis OX=214687 PE=3 SV=1	PREDICTED: uncharacterized protein At1g28695 [Musa acuminata subsp. malaccensis]
Macma4_07_g23580	--	--	--	K03457|2.59473e-30|ath:AT5G03560|(RefSeq) Tetratricopeptide repeat (TPR)-like superfamily protein; K03457 nucleobase:cation symporter-1, NCS1 family	[R]	General function prediction only	PPR repeat family;; PPR repeat;; PPR repeat;; Pentatricopeptide repeat domain	Pentatricopeptide repeat-containing protein At4g38150 OS=Arabidopsis thaliana OX=3702 GN=At4g38150 PE=2 SV=1	Uncharacterized protein OS=Ensete ventricosum OX=4639 GN=B296_00024302 PE=4 SV=1	PREDICTED: pentatricopeptide repeat-containing protein At4g38150-like [Musa acuminata subsp. malaccensis]
Macma4_07_g25850	[R]	General function prediction only	Biological Process: lipid metabolic process (GO:0006629);; Molecular Function: hydrolase activity, acting on ester bonds (GO:0016788);;	K01052|0|mus:103988597|(RefSeq) triacylglycerol lipase 2-like; K01052 lysosomal acid lipase/cholesteryl ester hydrolase [EC:3.1.1.13]	[I]	Lipid transport and metabolism	Partial alpha/beta-hydrolase lipase region;; alpha/beta hydrolase fold	Triacylglycerol lipase 2 OS=Arabidopsis thaliana OX=3702 GN=LIP2 PE=2 SV=1	Uncharacterized protein OS=Musa acuminata subsp. malaccensis OX=214687 PE=4 SV=1	PREDICTED: triacylglycerol lipase 2-like [Musa acuminata subsp. malaccensis]
Macma4_06_g32950	--	--	Molecular Function: aspartic-type endopeptidase activity (GO:0004190);; Biological Process: proteolysis (GO:0006508);; Cellular Component: integral component of membrane (GO:0016021);;	K00924|3.61191e-161|brp:103845515|(RefSeq) aspartic proteinase-like protein 2; K00924 kinase [EC:2.7.1.-]	[O]	Posttranslational modification, protein turnover, chaperones	Xylanase inhibitor N-terminal;; Eukaryotic aspartyl protease;; Xylanase inhibitor C-terminal	Aspartic proteinase 36 OS=Arabidopsis thaliana OX=3702 GN=A36 PE=1 SV=1	Uncharacterized protein OS=Musa acuminata subsp. malaccensis OX=214687 GN=103989431 PE=3 SV=1	PREDICTED: aspartic proteinase-like protein 2 [Musa acuminata subsp. malaccensis]
Macma4_06_g07310	[T]	Signal transduction mechanisms	Cellular Component: protein phosphatase type 2A complex (GO:0000159);; Biological Process: regulation of phosphoprotein phosphatase activity (GO:0034047);;	K04354|0|mus:103987033|(RefSeq) serine/threonine protein phosphatase 2A 55 kDa regulatory subunit B beta isoform-like; K04354 serine/threonine-protein phosphatase 2A regulatory subunit B	[T]	Signal transduction mechanisms	WD domain, G-beta repeat	Serine/threonine protein phosphatase 2A 55 kDa regulatory subunit B beta isoform OS=Oryza sativa subsp. japonica OX=39947 GN=Os02g0224200 PE=2 SV=1	Serine/threonine-protein phosphatase 2A 55 kDa regulatory subunit B OS=Musa acuminata subsp. malaccensis OX=214687 PE=3 SV=1	unnamed protein product [Musa acuminata subsp. malaccensis]
Macma4_01_g13030	[K]	Transcription	Molecular Function: DNA binding (GO:0003677);; Molecular Function: DNA-directed 5'-3' RNA polymerase activity (GO:0003899);; Biological Process: transcription, DNA-templated (GO:0006351);; Molecular Function: protein dimerization activity (GO:0046983);;	K03027|0|mus:103993655|(RefSeq) DNA-directed RNA polymerases I and III subunit rpac1 isoform X2; K03027 DNA-directed RNA polymerases I and III subunit RPAC1	[K]	Transcription	RNA polymerase Rpb3/Rpb11 dimerisation domain;; RNA polymerase Rpb3/RpoA insert domain	DNA-directed RNA polymerases I and III subunit rpac1 OS=Dictyostelium discoideum OX=44689 GN=polr1c PE=3 SV=1	Uncharacterized protein OS=Musa acuminata subsp. malaccensis OX=214687 GN=103993655 PE=4 SV=1	PREDICTED: DNA-directed RNA polymerases I and III subunit rpac1 isoform X2 [Musa acuminata subsp. malaccensis]
Macma4_08_g16990	--	--	--	K12169|0|mus:103973458|(RefSeq) E3 ubiquitin-protein ligase RKP isoform X1; K12169 Kip1 ubiquitination-promoting complex protein 1 [EC:2.3.2.27]	[A]	RNA processing and modification	E3 ubiquitin-protein ligase RKP N-terminus;; SPRY domain	E3 ubiquitin-protein ligase RKP OS=Arabidopsis thaliana OX=3702 GN=RKP PE=2 SV=2	E3 ubiquitin-protein ligase RKP isoform X1 OS=Phoenix dactylifera OX=42345 GN=LOC103721719 PE=4 SV=1	PREDICTED: E3 ubiquitin-protein ligase RKP isoform X1 [Musa acuminata subsp. malaccensis]
Macma4_07_g15450	[R]	General function prediction only	--	K15502|3.98592e-19|vvi:100243645|(RefSeq) protein ACCELERATED CELL DEATH 6; K15502 serine/threonine-protein phosphatase 6 regulatory ankyrin repeat subunit A	[R]	General function prediction only	Ankyrin repeats (3 copies);; Ankyrin repeats (many copies);; Ankyrin repeats (many copies);; Domain of unknown function;; Ankyrin repeat;; Ankyrin repeat	Ankyrin repeat-containing protein ITN1 OS=Arabidopsis thaliana OX=3702 GN=ITN1 PE=1 SV=1	Uncharacterized protein OS=Musa acuminata subsp. malaccensis OX=214687 PE=4 SV=1	PREDICTED: ankyrin repeat-containing protein ITN1-like [Musa acuminata subsp. malaccensis]
Macma4_02_g00740	--	--	--	K01205|4.08802e-49|mus:104000580|(RefSeq) alpha-N-acetylglucosaminidase-like isoform X1; K01205 alpha-N-acetylglucosaminidase [EC:3.2.1.50]	[U]	Intracellular trafficking, secretion, and vesicular transport	Alpha-N-acetylglucosaminidase (NAGLU) tim-barrel domain	Alpha-N-acetylglucosaminidase OS=Arabidopsis thaliana OX=3702 GN=NAGLU PE=2 SV=1	Uncharacterized protein OS=Musa acuminata subsp. malaccensis OX=214687 PE=4 SV=1	unnamed protein product [Musa acuminata subsp. malaccensis]
XLOC_015783	--	--	--	--	--	--	zinc-finger of the FCS-type, C2-C2	FCS-Like Zinc finger 18 OS=Arabidopsis thaliana OX=3702 GN=FLZ18 PE=1 SV=1	--	PREDICTED: uncharacterized protein LOC103985536 [Musa acuminata subsp. malaccensis]
Macma4_06_g19870	--	--	Biological Process: nuclear division (GO:0000280);; Biological Process: sister chromatid segregation (GO:0000819);; Biological Process: reproductive process (GO:0044702);; Biological Process: system development (GO:0048731);;	K11268|0|mus:103988113|(RefSeq) protein CHROMOSOME TRANSMISSION FIDELITY 7; K11268 N-acetyltransferase [EC:2.3.1.-]	[L]	Replication, recombination and repair	ESCO1/2 acetyl-transferase;; zinc-finger of acetyl-transferase ESCO	Protein CHROMOSOME TRANSMISSION FIDELITY 7 OS=Arabidopsis thaliana OX=3702 GN=CTF7 PE=1 SV=1	Uncharacterized protein OS=Musa acuminata subsp. malaccensis OX=214687 PE=4 SV=1	PREDICTED: protein CHROMOSOME TRANSMISSION FIDELITY 7 [Musa acuminata subsp. malaccensis]
Macma4_04_g08650	[R]	General function prediction only	Molecular Function: GTP binding (GO:0005525);; Cellular Component: intracellular (GO:0005622);; Biological Process: small GTPase mediated signal transduction (GO:0007264);;	K07904|8.20514e-13|egu:105047487|(RefSeq) ras-related protein RIC2-like; K07904 Ras-related protein Rab-11A	[U]	Intracellular trafficking, secretion, and vesicular transport	--	Ras-related protein RABA1d OS=Arabidopsis thaliana OX=3702 GN=RABA1D PE=1 SV=1	Uncharacterized protein OS=Musa acuminata subsp. malaccensis OX=214687 PE=4 SV=1	unnamed protein product [Musa acuminata subsp. malaccensis]
Macma4_03_g33650	--	--	--	--	--	--	--	--	Uncharacterized protein OS=Ensete ventricosum OX=4639 GN=B296_00022970 PE=4 SV=1	PREDICTED: uncharacterized protein LOC103979785 [Musa acuminata subsp. malaccensis]
Macma4_04_g40800	--	--	--	K14488|1.11843e-17|mus:103983773|(RefSeq) auxin-responsive protein SAUR71-like; K14488 SAUR family protein	--	--	Auxin responsive protein	Auxin-responsive protein SAUR71 OS=Arabidopsis thaliana OX=3702 GN=SAUR71 PE=2 SV=1	Uncharacterized protein OS=Ensete ventricosum OX=4639 GN=GW17_00010668 PE=4 SV=1	hypothetical protein C4D60_Mb04t38550 [Musa balbisiana]
Macma4_08_g01720	--	--	--	--	--	--	--	--	Uncharacterized protein OS=Musa acuminata subsp. malaccensis OX=214687 PE=4 SV=1	unnamed protein product [Musa acuminata subsp. malaccensis]
Macma4_09_g04210	[R]	General function prediction only	--	K15502|5.99823e-16|vvi:100243645|(RefSeq) protein ACCELERATED CELL DEATH 6; K15502 serine/threonine-protein phosphatase 6 regulatory ankyrin repeat subunit A	[R]	General function prediction only	Ankyrin repeats (3 copies);; Ankyrin repeats (many copies);; Domain of unknown function;; Ankyrin repeats (many copies);; Ankyrin repeat;; Ankyrin repeat	Ankyrin repeat-containing protein ITN1 OS=Arabidopsis thaliana OX=3702 GN=ITN1 PE=1 SV=1	Uncharacterized protein OS=Musa acuminata subsp. malaccensis OX=214687 PE=4 SV=1	PREDICTED: ankyrin repeat-containing protein ITN1-like isoform X1 [Musa acuminata subsp. malaccensis]
Macma4_04_g38910	[R]	General function prediction only	Molecular Function: oxidoreductase activity (GO:0016491);; Molecular Function: metal ion binding (GO:0046872);; Biological Process: oxidation-reduction process (GO:0055114);;	K18054|5.70822e-69|bdi:100823703|(RefSeq) 2'-deoxymugineic-acid 2'-dioxygenase; K18054 2'-deoxymugineic-acid 2'-dioxygenase / mugineic-acid 3-dioxygenase [EC:1.14.11.25]	[QR]	--	2OG-Fe(II) oxygenase superfamily;; non-haem dioxygenase in morphine synthesis N-terminal	Flavanone 3-dioxygenase 2 OS=Oryza sativa subsp. japonica OX=39947 GN=F3H-2 PE=1 SV=1	Uncharacterized protein OS=Musa acuminata subsp. malaccensis OX=214687 PE=3 SV=1	PREDICTED: protein DOWNY MILDEW RESISTANCE 6-like isoform X2 [Musa acuminata subsp. malaccensis]
Macma4_10_g21990	--	--	--	K15397|0|mus:103968550|(RefSeq) 3-ketoacyl-CoA synthase 6-like; K15397 3-ketoacyl-CoA synthase [EC:2.3.1.199]	--	--	FAE1/Type III polyketide synthase-like protein;; 3-Oxoacyl-[acyl-carrier-protein (ACP)] synthase III C terminal;; Chalcone and stilbene synthases, C-terminal domain;; Chalcone and stilbene synthases, N-terminal domain	3-ketoacyl-CoA synthase 6 OS=Arabidopsis thaliana OX=3702 GN=CUT1 PE=1 SV=1	3-ketoacyl-CoA synthase OS=Phoenix dactylifera OX=42345 GN=LOC103716280 PE=3 SV=1	PREDICTED: 3-ketoacyl-CoA synthase 6-like [Musa acuminata subsp. malaccensis]
Macma4_03_g19530	--	--	--	--	--	--	--	--	Uncharacterized protein OS=Musa acuminata subsp. malaccensis OX=214687 PE=4 SV=1	unnamed protein product [Musa acuminata subsp. malaccensis]
Macma4_09_g25030	--	--	--	--	--	--	--	--	Uncharacterized protein OS=Musa acuminata subsp. malaccensis OX=214687 PE=4 SV=1	unnamed protein product [Musa acuminata subsp. malaccensis]
Macma4_10_g22890	[R]	General function prediction only	Molecular Function: ATP binding (GO:0005524);; Molecular Function: ATPase activity (GO:0016887);;	K06185|9.69234e-61|cre:CHLREDRAFT_132213|(RefSeq) flagellar associated protein; K06185 ATP-binding cassette, subfamily F, member 2	[R]	General function prediction only	ABC transporter;; ABC transporter;; AAA domain, putative AbiEii toxin, Type IV TA system;; RecF/RecN/SMC N terminal domain;; ATPase family associated with various cellular activities (AAA)	ABC transporter F family member 5 OS=Arabidopsis thaliana OX=3702 GN=ABCF5 PE=2 SV=1	Uncharacterized protein OS=Musa acuminata subsp. malaccensis OX=214687 PE=4 SV=1	PREDICTED: ABC transporter F family member 5-like [Musa acuminata subsp. malaccensis]
Macma4_06_g36220	--	--	--	K04650|0|mus:103989714|(RefSeq) uncharacterized protein LOC103989714 isoform X1; K04650 nuclear receptor co-repressor 1	[K]	Transcription	Myb-like DNA-binding domain;; Myb DNA-binding like;; Myb-like DNA-binding domain	Nuclear receptor corepressor 1 OS=Xenopus tropicalis OX=8364 GN=ncor1 PE=2 SV=1	Uncharacterized protein OS=Musa acuminata subsp. malaccensis OX=214687 PE=4 SV=1	PREDICTED: uncharacterized protein LOC103989714 isoform X1 [Musa acuminata subsp. malaccensis]
Macma4_07_g02820	--	--	--	--	--	--	P21-Rho-binding domain	CRIB domain-containing protein RIC4 OS=Arabidopsis thaliana OX=3702 GN=RIC4 PE=1 SV=1	Uncharacterized protein OS=Ensete ventricosum OX=4639 GN=GW17_00027998 PE=4 SV=1	PREDICTED: CRIB domain-containing protein RIC4-like [Musa acuminata subsp. malaccensis]
Macma4_10_g08720	--	--	--	K00735|1.40034e-126|mus:103993406|(RefSeq) probable glucuronosyltransferase Os05g0123100; K20869 putative beta-1,4-xylosyltransferase IRX9 [EC:2.4.2.-]	[O]	Posttranslational modification, protein turnover, chaperones	Glycosyltransferase family 43	Beta-1,4-xylosyltransferase IRX9 OS=Arabidopsis thaliana OX=3702 GN=IRX9 PE=1 SV=1	Glycosyltransferases OS=Musa acuminata subsp. malaccensis OX=214687 PE=3 SV=1	PREDICTED: probable beta-1,4-xylosyltransferase IRX9 [Musa acuminata subsp. malaccensis]
Macma4_07_g21400	[H]	Coenzyme transport and metabolism	--	K01922|0|mus:103973933|(RefSeq) phosphopantothenate--cysteine ligase 2-like isoform X1; K01922 phosphopantothenate---cysteine ligase (ATP) [EC:6.3.2.51]	[R]	General function prediction only	DNA / pantothenate metabolism flavoprotein	Phosphopantothenate--cysteine ligase 2 OS=Oryza sativa subsp. japonica OX=39947 GN=Os08g0176100 PE=2 SV=2	Uncharacterized protein OS=Musa acuminata subsp. malaccensis OX=214687 PE=4 SV=1	PREDICTED: phosphopantothenate--cysteine ligase 2-like isoform X1 [Musa acuminata subsp. malaccensis]
XLOC_010144	[O]	Posttranslational modification, protein turnover, chaperones	Molecular Function: ATP binding (GO:0005524);;	K03062|3.40105e-90|mus:103980721|(RefSeq) 26S protease regulatory subunit 4 homolog isoform X1; K03062 26S proteasome regulatory subunit T2	[O]	Posttranslational modification, protein turnover, chaperones	Proteasomal ATPase OB C-terminal domain	26S proteasome regulatory subunit 4 homolog B OS=Arabidopsis thaliana OX=3702 GN=RPT2B PE=1 SV=1	--	hypothetical protein BHM03_00052074 [Ensete ventricosum]
Macma4_11_g22790	--	--	--	--	--	--	Transcription factor regulating root and shoot growth via Pin3;; Transcription factor BRX N-terminal domain	Protein Brevis radix-like 2 OS=Arabidopsis thaliana OX=3702 GN=BRXL2 PE=2 SV=1	Uncharacterized protein OS=Musa acuminata subsp. malaccensis OX=214687 PE=4 SV=1	PREDICTED: protein Brevis radix-like 4 [Musa acuminata subsp. malaccensis]
Macma4_02_g10650	--	--	--	K12126|3.53275e-58|pda:103720973|(RefSeq) transcription factor PHYTOCHROME INTERACTING FACTOR-LIKE 13-like	--	--	Helix-loop-helix DNA-binding domain	Transcription factor PHYTOCHROME INTERACTING FACTOR-LIKE 15 OS=Oryza sativa subsp. japonica OX=39947 GN=PIL15 PE=1 SV=2	Uncharacterized protein OS=Ensete ventricosum OX=4639 GN=B296_00011501 PE=4 SV=1	hypothetical protein BHE74_00042159 [Ensete ventricosum]
Macma4_09_g00530	--	--	--	--	--	--	Protein of unknown function (DUF1639)	--	Uncharacterized protein OS=Ensete ventricosum OX=4639 GN=B296_00022566 PE=4 SV=1	PREDICTED: uncharacterized protein LOC103996587 [Musa acuminata subsp. malaccensis]
Macma4_10_g08840	--	--	--	K19366|3.16221e-17|aly:ARALYDRAFT_656390|(RefSeq) hypothetical protein; K19366 spartin	--	--	--	--	Uncharacterized protein OS=Musa acuminata subsp. malaccensis OX=214687 GN=103999606 PE=4 SV=1	PREDICTED: uncharacterized protein LOC103999606 [Musa acuminata subsp. malaccensis]
Macma4_03_g23440	--	--	Molecular Function: protein serine/threonine phosphatase activity (GO:0004722);; Biological Process: protein dephosphorylation (GO:0006470);;	K17500|3.3786e-16|osa:4347278|(RefSeq) probable protein phosphatase 2C 69; K17500 integrin-linked kinase-associated serine/threonine phosphatase 2C [EC:3.1.3.16]	[T]	Signal transduction mechanisms	--	Probable protein phosphatase 2C 12 OS=Arabidopsis thaliana OX=3702 GN=At1g47380 PE=2 SV=1	Uncharacterized protein OS=Musa acuminata subsp. malaccensis OX=214687 PE=4 SV=1	unnamed protein product [Musa acuminata subsp. malaccensis]
Macma4_08_g19150	--	--	--	K11293|7.17036e-10|mpp:MICPUCDRAFT_47127|(RefSeq) hypothetical protein; K11293 protein HIRA/HIR1	--	--	--	Protein PHYTOCHROME-DEPENDENT LATE-FLOWERING OS=Arabidopsis thaliana OX=3702 GN=PHL PE=1 SV=1	Uncharacterized protein OS=Musa acuminata subsp. malaccensis OX=214687 PE=4 SV=1	PREDICTED: uncharacterized protein LOC103994770 isoform X2 [Musa acuminata subsp. malaccensis]
Macma4_08_g21110	[E]	Amino acid transport and metabolism	Cellular Component: cytoplasm (GO:0005737);; Molecular Function: zinc ion binding (GO:0008270);; Biological Process: methionine biosynthetic process (GO:0009086);; Biological Process: methylation (GO:0032259);; Molecular Function: betaine-homocysteine S-methyltransferase activity (GO:0047150);;	K00547|0|mus:103995107|(RefSeq) homocysteine S-methyltransferase 2 isoform X1; K00547 homocysteine S-methyltransferase [EC:2.1.1.10]	[E]	Amino acid transport and metabolism	Homocysteine S-methyltransferase	Homocysteine S-methyltransferase 2 OS=Zea mays OX=4577 GN=HMT-2 PE=2 SV=1	Uncharacterized protein OS=Musa acuminata subsp. malaccensis OX=214687 GN=103995107 PE=4 SV=1	unnamed protein product [Musa acuminata subsp. malaccensis]
Macma4_07_g26630	--	--	--	--	--	--	--	--	Uncharacterized protein OS=Musa acuminata subsp. malaccensis OX=214687 PE=4 SV=1	--
Macma4_05_g11370	--	--	Cellular Component: plasma membrane (GO:0005886);; Molecular Function: peptide-methionine (R)-S-oxide reductase activity (GO:0033743);; Biological Process: oxidation-reduction process (GO:0055114);;	--	--	--	SelR domain	--	Uncharacterized protein OS=Ensete ventricosum OX=4639 GN=B296_00056396 PE=4 SV=1	PREDICTED: uncharacterized protein LOC103984578 [Musa acuminata subsp. malaccensis]
Macma4_04_g35380	[GEPR]	--	Molecular Function: carbohydrate:proton symporter activity (GO:0005351);; Molecular Function: glucose transmembrane transporter activity (GO:0005355);; Cellular Component: integral component of plasma membrane (GO:0005887);; Biological Process: proton transmembrane transport (GO:0015992);; Biological Process: glucose import (GO:0046323);; Biological Process: glucose transmembrane transport (GO:19…	K08150|0|pda:103703900|(RefSeq) probable inositol transporter 2; K08150 MFS transporter, SP family, solute carrier family 2 (myo-inositol transporter), member 13	[R]	General function prediction only	Sugar (and other) transporter;; Major Facilitator Superfamily;; Fungal trichothecene efflux pump (TRI12);; MFS/sugar transport protein	Probable inositol transporter 2 OS=Arabidopsis thaliana OX=3702 GN=INT2 PE=1 SV=1	probable inositol transporter 2 OS=Phoenix dactylifera OX=42345 GN=LOC103703900 PE=3 SV=1	unnamed protein product [Musa acuminata subsp. malaccensis]
Macma4_06_g20290	--	--	Molecular Function: DNA binding (GO:0003677);; Cellular Component: nucleus (GO:0005634);; Biological Process: regulation of transcription, DNA-templated (GO:0006355);;	K12581|4.31454e-10|bna:106383523|(RefSeq) NAC domain-containing protein 89-like	--	--	No apical meristem (NAM) protein	NAC domain-containing protein 104 OS=Arabidopsis thaliana OX=3702 GN=NAC104 PE=2 SV=1	Uncharacterized protein OS=Musa acuminata subsp. malaccensis OX=214687 GN=103988148 PE=4 SV=1	PREDICTED: NAC domain-containing protein 104 [Musa acuminata subsp. malaccensis]
Macma4_09_g05070	[R]	General function prediction only	Molecular Function: GTP binding (GO:0005525);; Cellular Component: intracellular (GO:0005622);; Biological Process: small GTPase mediated signal transduction (GO:0007264);; Molecular Function: hydrolase activity (GO:0016787);;	K07937|1.90446e-132|mus:103996992|(RefSeq) ADP-ribosylation factor 1; K07937 ADP-ribosylation factor 1	[U]	Intracellular trafficking, secretion, and vesicular transport	ADP-ribosylation factor family;; Ras of Complex, Roc, domain of DAPkinase;; Signal recognition particle receptor beta subunit;; Ras family;; Gtr1/RagA G protein conserved region;; 50S ribosome-binding GTPase	ADP-ribosylation factor 1 OS=Oryza sativa subsp. japonica OX=39947 GN=Os01g0813400 PE=2 SV=3	Uncharacterized protein OS=Oryza meridionalis OX=40149 PE=3 SV=1	hypothetical protein ZIOFF_060179 [Zingiber officinale]
Macma4_10_g24710	--	--	Molecular Function: DNA-binding transcription factor activity (GO:0003700);; Biological Process: regulation of transcription, DNA-templated (GO:0006355);; Molecular Function: sequence-specific DNA binding (GO:0043565);;	K09060|1.6878e-07|bvg:104893043|(RefSeq) bZIP transcription factor 68; K09060 plant G-box-binding factor	--	--	bZIP transcription factor;; Basic region leucine zipper	bZIP transcription factor 44 OS=Arabidopsis thaliana OX=3702 GN=BZIP44 PE=1 SV=1	Uncharacterized protein OS=Musa acuminata subsp. malaccensis OX=214687 GN=103968798 PE=4 SV=1	hypothetical protein C4D60_Mb10t09760 [Musa balbisiana]
Macma4_09_g10720	--	--	--	K11855|0|mus:103997536|(RefSeq) ubiquitin carboxyl-terminal hydrolase 25; K11855 ubiquitin carboxyl-terminal hydrolase 36/42 [EC:3.4.19.12]	[O]	Posttranslational modification, protein turnover, chaperones	Ubiquitin carboxyl-terminal hydrolase;; Ubiquitin carboxyl-terminal hydrolase	Ubiquitin carboxyl-terminal hydrolase 25 OS=Arabidopsis thaliana OX=3702 GN=UBP25 PE=2 SV=1	Uncharacterized protein OS=Musa acuminata subsp. malaccensis OX=214687 PE=3 SV=1	PREDICTED: ubiquitin carboxyl-terminal hydrolase 25 [Musa acuminata subsp. malaccensis]
Macma4_08_g35590	--	--	Molecular Function: nutrient reservoir activity (GO:0045735);;	--	--	--	Cupin;; Cupin domain	Vicilin-like seed storage protein At2g28490 OS=Arabidopsis thaliana OX=3702 GN=At2g28490 PE=2 SV=1	Uncharacterized protein OS=Musa acuminata subsp. malaccensis OX=214687 PE=4 SV=1	PREDICTED: vicilin-like seed storage protein At2g28490 [Musa acuminata subsp. malaccensis]
Macma4_10_g20300	--	--	Biological Process: regulation of transcription, DNA-templated (GO:0006355);;	K14494|5.56577e-38|eus:EUTSA_v10020431mg|(RefSeq) hypothetical protein; K14494 DELLA protein	--	--	GRAS domain family	Protein SHORT-ROOT OS=Arabidopsis thaliana OX=3702 GN=SHR PE=1 SV=1	Uncharacterized protein OS=Musa acuminata subsp. malaccensis OX=214687 GN=103969770 PE=3 SV=1	hypothetical protein C4D60_Mb10t13740 [Musa balbisiana]
Macma4_04_g41760	--	--	Molecular Function: intramolecular transferase activity (GO:0016866);; Biological Process: cellulose biosynthetic process (GO:0030244);;	K13379|0|mus:103982136|(RefSeq) UDP-arabinopyranose mutase 3; K13379 reversibly glycosylated polypeptide / UDP-arabinopyranose mutase [EC:2.4.1.- 5.4.99.30]	--	--	Reversibly glycosylated polypeptide	UDP-arabinopyranose mutase 3 OS=Oryza sativa subsp. japonica OX=39947 GN=UAM3 PE=1 SV=1	UDP-arabinopyranose mutase 1 OS=Phoenix dactylifera OX=42345 GN=LOC103722878 PE=4 SV=1	PREDICTED: UDP-arabinopyranose mutase 3 [Musa acuminata subsp. malaccensis]
Macma4_03_g04940	--	--	--	K14413|2.77544e-07|cam:101489015|(RefSeq) probable beta-1,3-galactosyltransferase 16; K20843 hydroxyproline O-galactosyltransferase 2/3/4/5/6 [EC:2.4.1.-]	[G]	Carbohydrate transport and metabolism	Galactosyltransferase	Beta-1,3-galactosyltransferase pvg3 OS=Schizosaccharomyces pombe (strain 972 / ATCC 24843) OX=284812 GN=pvg3 PE=1 SV=1	Hexosyltransferase OS=Ensete ventricosum OX=4639 GN=B296_00009505 PE=3 SV=1	PREDICTED: beta-1,3-galactosyltransferase pvg3-like [Musa acuminata subsp. malaccensis]
Macma4_04_g30240	[S]	Function unknown	Cellular Component: integral component of membrane (GO:0016021);;	K19755|1.14719e-60|obr:102705188|(RefSeq) MORN repeat-containing protein 4-like; K19755 radial spoke head protein 1	[R]	General function prediction only	MORN repeat	Phosphatidylinositol 4-phosphate 5-kinase 1 OS=Arabidopsis thaliana OX=3702 GN=PIP5K1 PE=1 SV=1	Uncharacterized protein OS=Musa acuminata subsp. malaccensis OX=214687 GN=103983061 PE=4 SV=1	PREDICTED: uncharacterized protein LOC103983061 [Musa acuminata subsp. malaccensis]
Macma4_05_g29980	[IQ]	--	--	K14760|0|mus:103986329|(RefSeq) 2-succinylbenzoate--CoA ligase, chloroplastic/peroxisomal isoform X2; K14760 acyl-activating enzyme 14 [EC:6.2.1.26]	[I]	Lipid transport and metabolism	AMP-binding enzyme;; AMP-binding enzyme C-terminal domain	2-succinylbenzoate--CoA ligase, chloroplastic/peroxisomal OS=Arabidopsis thaliana OX=3702 GN=AAE14 PE=1 SV=1	Uncharacterized protein OS=Musa acuminata subsp. malaccensis OX=214687 PE=4 SV=1	PREDICTED: 2-succinylbenzoate--CoA ligase, chloroplastic/peroxisomal isoform X2 [Musa acuminata subsp. malaccensis]
Macma4_05_g22480	[V]	Defense mechanisms	--	K05665|0|gra:105775746|(RefSeq) putative ABC transporter C family member 15; K05665 ATP-binding cassette, subfamily C (CFTR/MRP), member 1 [EC:7.6.2.3]	[Q]	Secondary metabolites biosynthesis, transport and catabolism	ABC transporter transmembrane region;; ABC transporter;; 50S ribosome-binding GTPase	ABC transporter C family member 3 OS=Arabidopsis thaliana OX=3702 GN=ABCC3 PE=1 SV=1	ABC transporter C family member 3-like isoform X1 OS=Phoenix dactylifera OX=42345 GN=LOC103708769 PE=4 SV=1	hypothetical protein C4D60_Mb05t21160 [Musa balbisiana]
Macma4_10_g20240	--	--	--	--	--	--	--	--	Uncharacterized protein OS=Musa acuminata subsp. malaccensis OX=214687 PE=4 SV=1	unnamed protein product [Musa acuminata subsp. malaccensis]
Macma4_05_g21890	[J]	Translation, ribosomal structure and biogenesis	Molecular Function: RNA binding (GO:0003723);; Molecular Function: structural constituent of ribosome (GO:0003735);; Biological Process: translation (GO:0006412);; Cellular Component: large ribosomal subunit (GO:0015934);;	K02938|2.7717e-175|mus:103985811|(RefSeq) 60S ribosomal protein L8; K02938 large subunit ribosomal protein L8e	[J]	Translation, ribosomal structure and biogenesis	Ribosomal Proteins L2, C-terminal domain;; Ribosomal Proteins L2, RNA binding domain	60S ribosomal protein L8 OS=Solanum lycopersicum OX=4081 GN=RPL8 PE=2 SV=1	Uncharacterized protein OS=Musa acuminata subsp. malaccensis OX=214687 GN=103985811 PE=3 SV=1	PREDICTED: 60S ribosomal protein L8 [Musa acuminata subsp. malaccensis]
Macma4_03_g07540	--	--	Molecular Function: DNA binding (GO:0003677);; Molecular Function: DNA-binding transcription factor activity (GO:0003700);; Cellular Component: nucleus (GO:0005634);; Biological Process: regulation of transcription, DNA-templated (GO:0006355);; Molecular Function: transcription factor binding (GO:0008134);; Biological Process: stomatal lineage progression (GO:0010440);; Molecular Function: protei…	K09264|2.58167e-159|mus:103977568|(RefSeq) MADS-box transcription factor 23-like; K09264 MADS-box transcription factor, plant	[K]	Transcription	K-box region;; SRF-type transcription factor (DNA-binding and dimerisation domain)	MADS-box transcription factor 27 OS=Oryza sativa subsp. japonica OX=39947 GN=MADS27 PE=2 SV=2	Uncharacterized protein OS=Musa acuminata subsp. malaccensis OX=214687 GN=103977568 PE=4 SV=1	PREDICTED: MADS-box transcription factor 23-like [Musa acuminata subsp. malaccensis]
Macma4_10_g16960	--	--	Molecular Function: structural constituent of ribosome (GO:0003735);; Cellular Component: ribosome (GO:0005840);; Biological Process: translation (GO:0006412);;	K02993|6.14115e-138|mus:104000959|(RefSeq) 40S ribosomal protein S7; K02993 small subunit ribosomal protein S7e	[J]	Translation, ribosomal structure and biogenesis	Ribosomal protein S7e	40S ribosomal protein S7 OS=Secale cereale OX=4550 GN=RPS7 PE=2 SV=1	40S ribosomal protein S7 OS=Musa acuminata subsp. malaccensis OX=214687 GN=104000959 PE=3 SV=1	PREDICTED: 40S ribosomal protein S7 [Musa acuminata subsp. malaccensis]
Macma4_08_g08150	--	--	Molecular Function: RNA binding (GO:0003723);;	K14945|0|mus:103993511|(RefSeq) KH domain-containing protein At1g09660/At1g09670-like; K14945 protein quaking	[A]	RNA processing and modification	Homodimerisation region of STAR domain protein;; KH domain	KH domain-containing protein At1g09660/At1g09670 OS=Arabidopsis thaliana OX=3702 GN=At1g09660/At1g09670 PE=2 SV=1	Uncharacterized protein OS=Musa acuminata subsp. malaccensis OX=214687 GN=103993511 PE=4 SV=1	PREDICTED: KH domain-containing protein At1g09660/At1g09670-like [Musa acuminata subsp. malaccensis]
Macma4_09_g20060	--	--	--	--	[R]	General function prediction only	Aluminium activated malate transporter;; Fusaric acid resistance protein-like	Aluminum-activated malate transporter 10 OS=Arabidopsis thaliana OX=3702 GN=ALMT10 PE=3 SV=2	Uncharacterized protein OS=Musa acuminata subsp. malaccensis OX=214687 PE=4 SV=1	PREDICTED: aluminum-activated malate transporter 10-like [Musa acuminata subsp. malaccensis]
Macma4_11_g22670	--	--	--	--	--	--	--	--	Uncharacterized protein OS=Ensete ventricosum OX=4639 GN=GW17_00042945 PE=4 SV=1	hypothetical protein C4D60_Mb11t20860 [Musa balbisiana]
Macma4_11_g04480	--	--	Molecular Function: oxidoreductase activity (GO:0016491);; Molecular Function: metal ion binding (GO:0046872);; Biological Process: oxidation-reduction process (GO:0055114);;	--	[QR]	--	non-haem dioxygenase in morphine synthesis N-terminal	S-norcoclaurine synthase 1 OS=Coptis japonica OX=3442 GN=NCS1 PE=1 SV=1	Uncharacterized protein OS=Musa acuminata subsp. malaccensis OX=214687 PE=4 SV=1	hypothetical protein C4D60_Mb11t04160 [Musa balbisiana]
Macma4_04_g07260	--	--	Cellular Component: nucleus (GO:0005634);;	K18811|0|mus:103981586|(RefSeq) cyclin-D5-3-like isoform X1; K18811 cyclin D5, plant	[D]	Cell cycle control, cell division, chromosome partitioning	Cyclin, N-terminal domain;; Cyclin, C-terminal domain	Cyclin-D5-3 OS=Oryza sativa subsp. japonica OX=39947 GN=CYCD5-3 PE=2 SV=1	Uncharacterized protein OS=Musa acuminata subsp. malaccensis OX=214687 GN=103981586 PE=3 SV=1	PREDICTED: cyclin-D5-3-like isoform X1 [Musa acuminata subsp. malaccensis]
Macma4_03_g13690	[S]	Function unknown	--	--	--	--	YbaB/EbfC DNA-binding family	Nucleoid-associated protein At2g24020, chloroplastic OS=Arabidopsis thaliana OX=3702 GN=STIC2 PE=1 SV=2	Uncharacterized protein OS=Musa acuminata subsp. malaccensis OX=214687 PE=4 SV=1	PREDICTED: nucleoid-associated protein At2g24020, chloroplastic-like [Musa acuminata subsp. malaccensis]
Macma4_10_g17340	[T]	Signal transduction mechanisms	--	K04459|5.90275e-61|smo:SELMODRAFT_27743|(RefSeq) hypothetical protein	[V]	Defense mechanisms	Dual specificity phosphatase, catalytic domain;; Gelsolin repeat	Protein-tyrosine-phosphatase MKP1 OS=Arabidopsis thaliana OX=3702 GN=MKP1 PE=1 SV=1	Uncharacterized protein OS=Ensete ventricosum OX=4639 GN=GW17_00013194 PE=4 SV=1	PREDICTED: protein-tyrosine-phosphatase MKP1-like [Musa acuminata subsp. malaccensis]
Macma4_07_g07850	[GEPR]	--	--	--	--	--	BT1 family;; Major Facilitator Superfamily	Folate-biopterin transporter 1, chloroplastic OS=Arabidopsis thaliana OX=3702 GN=At2g32040 PE=1 SV=2	Uncharacterized protein OS=Musa acuminata subsp. malaccensis OX=214687 PE=4 SV=1	PREDICTED: folate-biopterin transporter 1, chloroplastic-like isoform X1 [Musa acuminata subsp. malaccensis]
Macma4_03_g04430	--	--	--	K08825|6.37125e-18|ccp:CHC_T00008514001|(RefSeq) Putative serine/threonine protein kinase; K08825 dual specificity tyrosine-phosphorylation-regulated kinase 1 [EC:2.7.12.1]	[S]	Function unknown	PPPDE putative peptidase domain	DeSI-like protein At4g17486 OS=Arabidopsis thaliana OX=3702 GN=At4g17486 PE=2 SV=1	Uncharacterized protein OS=Musa acuminata subsp. malaccensis OX=214687 PE=4 SV=1	hypothetical protein C4D60_Mb03t04390 [Musa balbisiana]
Macma4_06_g20150	--	--	--	K17108|2.23178e-22|mus:103988137|(RefSeq) non-lysosomal glucosylceramidase; K17108 non-lysosomal glucosylceramidase [EC:3.2.1.45]	--	--	--	--	Uncharacterized protein OS=Musa acuminata subsp. malaccensis OX=214687 PE=4 SV=1	hypothetical protein BHE74_00007647, partial [Ensete ventricosum]
Macma4_10_g24750	--	--	--	K13944|1.51649e-35|gra:105792299|(RefSeq) LOB domain-containing protein 16; K13944 LOB domain-containing protein 16	--	--	Lateral organ boundaries (LOB) domain	Protein LATERAL ORGAN BOUNDARIES OS=Arabidopsis thaliana OX=3702 GN=LOB PE=1 SV=1	LOW QUALITY PROTEIN: LOB domain-containing protein 25-like OS=Phoenix dactylifera OX=42345 GN=LOC103711563 PE=4 SV=2	hypothetical protein C4D60_Mb10t09720 [Musa balbisiana]
Macma4_03_g29360	--	--	Cellular Component: plastid (GO:0009536);; Cellular Component: membrane (GO:0016020);;	--	--	--	--	--	Uncharacterized protein OS=Musa acuminata subsp. malaccensis OX=214687 PE=4 SV=1	PREDICTED: uncharacterized protein LOC103978726 [Musa acuminata subsp. malaccensis]
Macma4_01_g00270	--	--	Molecular Function: DNA binding (GO:0003677);; Molecular Function: DNA-directed 5'-3' RNA polymerase activity (GO:0003899);; Biological Process: transcription, DNA-templated (GO:0006351);;	K10908|6.3013e-67|egu:105050660|(RefSeq) DNA-directed RNA polymerase 2B, chloroplastic/mitochondrial-like; K10908 DNA-directed RNA polymerase, mitochondrial [EC:2.7.7.6]	[KL]	--	DNA-dependent RNA polymerase	DNA-directed RNA polymerase 2A (Fragment) OS=Nicotiana tabacum OX=4097 GN=RPOT2-SYL PE=3 SV=1	Uncharacterized protein OS=Musa acuminata subsp. malaccensis OX=214687 PE=4 SV=1	unnamed protein product [Musa acuminata subsp. malaccensis]
Macma4_05_g30910	--	--	Cellular Component: integral component of membrane (GO:0016021);;	--	[T]	Signal transduction mechanisms	Organic solute transporter Ostalpha	Transmembrane protein 184A OS=Homo sapiens OX=9606 GN=TMEM184A PE=1 SV=1	Uncharacterized protein OS=Musa acuminata subsp. malaccensis OX=214687 PE=4 SV=1	PREDICTED: transmembrane protein 184B [Musa acuminata subsp. malaccensis]
Macma4_09_g14500	--	--	--	--	--	--	Dormancy/auxin associated protein	--	Uncharacterized protein OS=Musa acuminata subsp. malaccensis OX=214687 GN=103997918 PE=4 SV=1	unnamed protein product, partial [Musa acuminata subsp. malaccensis]
Macma4_01_g25290	[O]	Posttranslational modification, protein turnover, chaperones	--	K03062|7.42881e-26|bvg:104899552|(RefSeq) 26S protease regulatory subunit 4 homolog; K03062 26S proteasome regulatory subunit T2	[O]	Posttranslational modification, protein turnover, chaperones	AAA+ lid domain	26S proteasome regulatory subunit 4 homolog OS=Oryza sativa subsp. japonica OX=39947 GN=TBP2 PE=2 SV=2	Uncharacterized protein OS=Ensete ventricosum OX=4639 GN=GW17_00054602 PE=4 SV=1	hypothetical protein C4D60_Mb04t12280 [Musa balbisiana]
Macma4_01_g17100	--	--	--	K07213|2.44043e-12|egr:104454107|(RefSeq) copper transport protein ATX1; K07213 copper chaperone	[P]	Inorganic ion transport and metabolism	Heavy-metal-associated domain	Heavy metal-associated isoprenylated plant protein 37 OS=Arabidopsis thaliana OX=3702 GN=HIPP37 PE=2 SV=1	Uncharacterized protein OS=Musa acuminata subsp. malaccensis OX=214687 PE=4 SV=1	PREDICTED: uncharacterized protein LOC103990121 [Musa acuminata subsp. malaccensis]
Macma4_05_g04950	--	--	--	--	--	--	--	Protein At-4/1 OS=Arabidopsis thaliana OX=3702 GN=At4g26020 PE=1 SV=1	Uncharacterized protein OS=Musa acuminata subsp. malaccensis OX=214687 PE=4 SV=1	PREDICTED: protein At-4/1 isoform X2 [Musa acuminata subsp. malaccensis]
Macma4_09_g18430	--	--	--	--	--	--	Protein of unknown function (DUF640)	Protein LIGHT-DEPENDENT SHORT HYPOCOTYLS 6 OS=Arabidopsis thaliana OX=3702 GN=LSH6 PE=1 SV=1	Uncharacterized protein OS=Ensete ventricosum OX=4639 GN=B296_00040663 PE=4 SV=1	PREDICTED: protein G1-like7 [Musa acuminata subsp. malaccensis]
Macma4_10_g08580	--	--	--	--	--	--	CUE domain	--	Uncharacterized protein OS=Musa acuminata subsp. malaccensis OX=214687 PE=4 SV=1	PREDICTED: uncharacterized protein LOC103973634 [Musa acuminata subsp. malaccensis]
Macma4_10_g15880	--	--	--	--	--	--	--	--	Uncharacterized protein OS=Musa acuminata subsp. malaccensis OX=214687 GN=104000670 PE=4 SV=1	PREDICTED: uncharacterized protein LOC104000670 [Musa acuminata subsp. malaccensis]
Macma4_08_g22900	--	--	--	--	--	--	--	--	Uncharacterized protein OS=Musa acuminata subsp. malaccensis OX=214687 PE=4 SV=1	unnamed protein product [Musa acuminata subsp. malaccensis]
Macma4_11_g13650	[J]	Translation, ribosomal structure and biogenesis	--	K02883|6.34484e-32|mus:103969323|(RefSeq) 60S ribosomal protein L18-2-like; K02883 large subunit ribosomal protein L18e	[J]	Translation, ribosomal structure and biogenesis	Ribosomal protein 60S L18 and 50S L18e	60S ribosomal protein L18-2 OS=Arabidopsis thaliana OX=3702 GN=RPL18B PE=1 SV=2	Uncharacterized protein OS=Musa acuminata subsp. malaccensis OX=214687 PE=3 SV=1	hypothetical protein F0562_019919 [Nyssa sinensis]
Macma4_06_g17560	--	--	--	K15113|2.56673e-64|mus:104000957|(RefSeq) mitoferrin-like; K15113 solute carrier family 25 (mitochondrial iron transporter), member 28/37	[C]	Energy production and conversion	Mitochondrial carrier protein	Mitoferrin OS=Dictyostelium discoideum OX=44689 GN=mcfF PE=3 SV=1	Uncharacterized protein (Fragment) OS=Ensete ventricosum OX=4639 GN=B296_00021501 PE=3 SV=1	hypothetical protein C4D60_Mb06t16260 [Musa balbisiana]
Macma4_08_g05640	--	--	Molecular Function: DNA binding (GO:0003677);; Cellular Component: nucleus (GO:0005634);; Molecular Function: zinc ion binding (GO:0008270);;	--	[KB]	--	CW-type Zinc Finger;; Methyl-CpG binding domain	Methyl-CpG-binding domain-containing protein 4 OS=Arabidopsis thaliana OX=3702 GN=MBD4 PE=1 SV=1	Uncharacterized protein OS=Musa acuminata subsp. malaccensis OX=214687 GN=103993733 PE=4 SV=1	hypothetical protein C4D60_Mb08t05330 [Musa balbisiana]
Macma4_09_g05360	--	--	--	K13447|0|mus:103997017|(RefSeq) respiratory burst oxidase homolog protein A-like; K13447 respiratory burst oxidase [EC:1.6.3.- 1.11.1.-]	[PQ]	--	Ferric reductase NAD binding domain;; Respiratory burst NADPH oxidase;; FAD-binding domain;; Ferric reductase like transmembrane component;; EF-hand domain;; EF hand	Respiratory burst oxidase homolog protein A OS=Solanum tuberosum OX=4113 GN=RBOHA PE=1 SV=1	Uncharacterized protein OS=Musa acuminata subsp. malaccensis OX=214687 PE=4 SV=1	PREDICTED: respiratory burst oxidase homolog protein A-like [Musa acuminata subsp. malaccensis]
Macma4_10_g20780	--	--	--	K01870|8.64071e-12|eus:EUTSA_v10003524mg|(RefSeq) hypothetical protein; K01870 isoleucyl-tRNA synthetase [EC:6.1.1.5]	--	--	Dirigent-like protein	Pterocarpan synthase 1 OS=Glycyrrhiza echinata OX=46348 GN=PTS1 PE=1 SV=1	Dirigent protein OS=Musa acuminata subsp. malaccensis OX=214687 GN=103969776 PE=3 SV=1	unnamed protein product [Musa acuminata subsp. malaccensis]
Macma4_06_g08490	--	--	--	--	--	--	PB1 domain	--	Uncharacterized protein (Fragment) OS=Ensete ventricosum OX=4639 GN=B296_00025607 PE=4 SV=1	unnamed protein product [Musa acuminata subsp. malaccensis]
Macma4_04_g13270	--	--	--	--	--	--	--	--	Uncharacterized protein OS=Ensete ventricosum OX=4639 GN=GW17_00000729 PE=4 SV=1	PREDICTED: uncharacterized protein LOC103981691 [Musa acuminata subsp. malaccensis]
Macma4_06_g32040	--	--	--	--	--	--	--	--	Uncharacterized protein OS=Ensete ventricosum OX=4639 GN=GW17_00035806 PE=4 SV=1	hypothetical protein C4D60_Mb06t29760 [Musa balbisiana]
Macma4_09_g03800	--	--	--	K13201|1.46433e-09|apro:F751_2792|(RefSeq) Nucleolysin TIAR; K13201 nucleolysin TIA-1/TIAR	--	--	SOUL heme-binding protein	Heme-binding-like protein At3g10130, chloroplastic OS=Arabidopsis thaliana OX=3702 GN=At3g10130 PE=1 SV=1	Uncharacterized protein OS=Ensete ventricosum OX=4639 GN=B296_00021480 PE=4 SV=1	PREDICTED: heme-binding-like protein At3g10130, chloroplastic [Musa acuminata subsp. malaccensis]
Macma4_10_g11380	--	--	Cellular Component: extracellular region (GO:0005576);; Cellular Component: cell wall (GO:0005618);; Biological Process: plant-type cell wall organization (GO:0009664);; Cellular Component: membrane (GO:0016020);;	K20628|4.29432e-104|smo:SELMODRAFT_87134|(RefSeq) hypothetical protein	--	--	Lytic transglycolase;; Expansin C-terminal domain	Putative expansin-A30 OS=Oryza sativa subsp. japonica OX=39947 GN=EXPA30 PE=3 SV=1	Expansin OS=Musa acuminata subsp. malaccensis OX=214687 GN=104000208 PE=3 SV=1	unnamed protein product [Musa acuminata subsp. malaccensis]
Macma4_03_g12790	[R]	General function prediction only	--	K12867|1.01982e-30|cvr:CHLNCDRAFT_134697|(RefSeq) hypothetical protein; K12867 pre-mRNA-splicing factor SYF1	[R]	General function prediction only	Calcineurin-like phosphoesterase	Probable inactive purple acid phosphatase 29 OS=Arabidopsis thaliana OX=3702 GN=PAP29 PE=2 SV=1	Uncharacterized protein OS=Musa acuminata subsp. malaccensis OX=214687 PE=4 SV=1	PREDICTED: probable inactive purple acid phosphatase 29 [Musa acuminata subsp. malaccensis]
Macma4_02_g21970	--	--	--	K11855|2.08127e-21|bvg:104906049|(RefSeq) ubiquitin carboxyl-terminal hydrolase 36; K11855 ubiquitin carboxyl-terminal hydrolase 36/42 [EC:3.4.19.12]	--	--	Hydrophobic seed protein;; Probable lipid transfer;; Protease inhibitor/seed storage/LTP family	Lipid transfer protein EARLI 1 OS=Arabidopsis thaliana OX=3702 GN=EARLI1 PE=1 SV=1	Uncharacterized protein OS=Ensete ventricosum OX=4639 GN=B296_00046863 PE=4 SV=1	PREDICTED: 14 kDa proline-rich protein DC2.15-like [Musa acuminata subsp. malaccensis]
Macma4_02_g23150	[R]	General function prediction only	Molecular Function: hydrolase activity (GO:0016787);;	K06130|0|mus:103976458|(RefSeq) acyl-protein thioesterase 2; K06130 lysophospholipase II [EC:3.1.1.5]	[I]	Lipid transport and metabolism	Phospholipase/Carboxylesterase;; Serine aminopeptidase, S33;; Serine hydrolase (FSH1);; Prolyl oligopeptidase family	Acyl-protein thioesterase 2 OS=Homo sapiens OX=9606 GN=LYPLA2 PE=1 SV=1	Uncharacterized protein OS=Musa acuminata subsp. malaccensis OX=214687 GN=103976458 PE=4 SV=1	hypothetical protein C4D60_Mb02t20340 [Musa balbisiana]
Macma4_05_g17570	--	--	--	--	--	--	Protein of unknown function (DUF677);; emp24/gp25L/p24 family/GOLD	--	Uncharacterized protein OS=Ensete ventricosum OX=4639 GN=GW17_00046451 PE=4 SV=1	PREDICTED: UPF0496 protein At4g34320-like [Musa acuminata subsp. malaccensis]
Macma4_11_g20380	--	--	Cellular Component: integral component of peroxisomal membrane (GO:0005779);; Biological Process: peroxisome fission (GO:0016559);; Molecular Function: identical protein binding (GO:0042802);; Biological Process: regulation of peroxisome size (GO:0044375);;	K13352|9.66864e-121|rcu:8266077|(RefSeq) peroxisomal membrane protein 11B; K13352 peroxin-11B	[U]	Intracellular trafficking, secretion, and vesicular transport	Peroxisomal biogenesis factor 11 (PEX11)	Peroxisomal membrane protein 11-4 OS=Oryza sativa subsp. japonica OX=39947 GN=PEX11-4 PE=2 SV=2	Uncharacterized protein OS=Musa acuminata subsp. malaccensis OX=214687 GN=103972010 PE=4 SV=1	PREDICTED: peroxisomal membrane protein 11-4 [Musa acuminata subsp. malaccensis]
Macma4_09_g01550	--	--	--	K13456|3.96474e-75|mus:103975089|(RefSeq) RPM1-interacting protein 4 isoform X2; K13456 RPM1-interacting protein 4	--	--	Cleavage site for pathogenic type III effector avirulence factor Avr	RPM1-interacting protein 4 OS=Arabidopsis thaliana OX=3702 GN=RIN4 PE=1 SV=1	Uncharacterized protein OS=Musa acuminata subsp. malaccensis OX=214687 PE=4 SV=1	PREDICTED: RPM1-interacting protein 4-like [Musa acuminata subsp. malaccensis]
Macma4_07_g09150	--	--	Biological Process: biological_process (GO:0044699);;	K03676|3.58016e-27|mus:103984097|(RefSeq) monothiol glutaredoxin-S2-like; K03676 glutaredoxin 3	[O]	Posttranslational modification, protein turnover, chaperones	--	Glutaredoxin-C7 OS=Oryza sativa subsp. japonica OX=39947 GN=GRXC7 PE=3 SV=1	Uncharacterized protein OS=Ensete ventricosum OX=4639 GN=GW17_00000544 PE=4 SV=1	PREDICTED: glutaredoxin-C7-like [Musa acuminata subsp. malaccensis]
Macma4_09_g00930	--	--	--	--	--	--	--	--	Uncharacterized protein OS=Musa acuminata subsp. malaccensis OX=214687 PE=4 SV=1	--
Macma4_03_g14590	--	--	Molecular Function: enzyme inhibitor activity (GO:0004857);; Biological Process: negative regulation of catalytic activity (GO:0043086);;	--	--	--	Plant invertase/pectin methylesterase inhibitor	Putative invertase inhibitor OS=Platanus orientalis OX=122832 PE=1 SV=1	Uncharacterized protein OS=Musa acuminata subsp. malaccensis OX=214687 GN=103973422 PE=4 SV=1	PREDICTED: putative invertase inhibitor [Musa acuminata subsp. malaccensis]
Macma4_04_g13520	[R]	General function prediction only	Molecular Function: zinc ion binding (GO:0008270);; Molecular Function: cinnamyl-alcohol dehydrogenase activity (GO:0045551);; Molecular Function: sinapyl alcohol dehydrogenase activity (GO:0052747);; Biological Process: oxidation-reduction process (GO:0055114);;	K00083|0|mus:103981314|(RefSeq) cinnamyl alcohol dehydrogenase 2 isoform X1; K00083 cinnamyl-alcohol dehydrogenase [EC:1.1.1.195]	[Q]	Secondary metabolites biosynthesis, transport and catabolism	Alcohol dehydrogenase GroES-like domain;; Zinc-binding dehydrogenase	Probable cinnamyl alcohol dehydrogenase 1 OS=Aralia cordata OX=29746 GN=CAD1 PE=2 SV=1	Uncharacterized protein OS=Musa acuminata subsp. malaccensis OX=214687 GN=103981314 PE=3 SV=1	PREDICTED: cinnamyl alcohol dehydrogenase 2 isoform X1 [Musa acuminata subsp. malaccensis]
Macma4_07_g13110	--	--	--	--	--	--	--	--	Uncharacterized protein OS=Musa acuminata subsp. malaccensis OX=214687 PE=4 SV=1	PREDICTED: uncharacterized protein LOC103991545 [Musa acuminata subsp. malaccensis]
Macma4_04_g38440	--	--	--	K03452|7.25297e-121|vvi:100250295|(RefSeq) magnesium/proton exchanger; K03452 magnesium/proton exchanger	[R]	General function prediction only	PPR repeat;; PPR repeat family;; PPR repeat;; Pentatricopeptide repeat domain;; DYW family of nucleic acid deaminases;; Pentacotripeptide-repeat region of PRORP;; Tetratricopeptide repeat;; Tetratricopeptide repeat	Pentatricopeptide repeat-containing protein At1g25360 OS=Arabidopsis thaliana OX=3702 GN=PCMP-H74 PE=2 SV=1	Uncharacterized protein OS=Ensete ventricosum OX=4639 GN=BHM03_00014826 PE=4 SV=1	PREDICTED: pentatricopeptide repeat-containing protein At3g24000, mitochondrial-like [Musa acuminata subsp. malaccensis]
XLOC_012706	--	--	--	K14319|7.25947e-10|pxb:103930802|(RefSeq) RAN GTPase-activating protein 2-like; K14319 Ran GTPase-activating protein 1	--	--	WPP domain	MFP1 attachment factor 1 OS=Solanum lycopersicum OX=4081 GN=MAF1 PE=1 SV=1	--	PREDICTED: MFP1 attachment factor 1-like [Musa acuminata subsp. malaccensis]
Macma4_09_g06420	[M]	Cell wall/membrane/envelope biogenesis	--	K01000|0|mus:103997101|(RefSeq) phospho-N-acetylmuramoyl-pentapeptide- transferase homolog; K01000 phospho-N-acetylmuramoyl-pentapeptide-transferase [EC:2.7.8.13]	--	--	Glycosyl transferase family 4;; Phospho-N-acetylmuramoyl-pentapeptide-transferase signature 1	Phospho-N-acetylmuramoyl-pentapeptide-transferase homolog OS=Arabidopsis thaliana OX=3702 GN=TRANS11 PE=2 SV=3	Uncharacterized protein OS=Musa acuminata subsp. malaccensis OX=214687 PE=3 SV=1	PREDICTED: phospho-N-acetylmuramoyl-pentapeptide-transferase homolog [Musa acuminata subsp. malaccensis]
Macma4_03_g25440	--	--	--	--	[K]	Transcription	Myb/SANT-like DNA-binding domain	Trihelix transcription factor PTL OS=Arabidopsis thaliana OX=3702 GN=PTL PE=1 SV=1	Uncharacterized protein OS=Ensete ventricosum OX=4639 GN=B296_00050237 PE=4 SV=1	PREDICTED: trihelix transcription factor PTL [Musa acuminata subsp. malaccensis]
Macma4_06_g37070	--	--	--	--	--	--	--	--	Uncharacterized protein OS=Musa acuminata subsp. malaccensis OX=214687 PE=4 SV=1	PREDICTED: uncharacterized protein LOC103972734 [Musa acuminata subsp. malaccensis]
Macma4_08_g00810	--	--	Molecular Function: zinc ion binding (GO:0008270);;	K10666|2.61406e-08|bna:106347616|(RefSeq) E3 ubiquitin-protein ligase RMA1-like; K10666 E3 ubiquitin-protein ligase RNF5 [EC:2.3.2.27]	[O]	Posttranslational modification, protein turnover, chaperones	Zinc finger, C3HC4 type (RING finger);; Ring finger domain;; zinc finger of C3HC4-type, RING;; RING-type zinc-finger;; Zinc finger, C3HC4 type (RING finger);; Zinc finger, C3HC4 type (RING finger)	E3 ubiquitin-protein ligase RNF4 OS=Rattus norvegicus OX=10116 GN=Rnf4 PE=1 SV=1	Uncharacterized protein OS=Musa acuminata subsp. malaccensis OX=214687 GN=103994154 PE=4 SV=1	PREDICTED: E3 ubiquitin-protein ligase BRE1 isoform X1 [Musa acuminata subsp. malaccensis]
Macma4_04_g11630	--	--	Molecular Function: translation initiation factor activity (GO:0003743);; Cellular Component: cytoplasm (GO:0005737);; Biological Process: translational initiation (GO:0006413);;	K03259|2.10057e-67|mus:103981163|(RefSeq) eukaryotic translation initiation factor NCBP-like; K03259 translation initiation factor 4E	[J]	Translation, ribosomal structure and biogenesis	Eukaryotic initiation factor 4E	Eukaryotic translation initiation factor NCBP OS=Triticum aestivum OX=4565 GN=NCBP PE=2 SV=1	Uncharacterized protein OS=Musa acuminata subsp. malaccensis OX=214687 GN=103981163 PE=3 SV=1	PREDICTED: eukaryotic translation initiation factor NCBP-like [Musa acuminata subsp. malaccensis]
Macma4_04_g26900	[I]	Lipid transport and metabolism	--	K00671|0|mus:103971610|(RefSeq) glycylpeptide N-tetradecanoyltransferase 1-like; K00671 glycylpeptide N-tetradecanoyltransferase [EC:2.3.1.97]	[I]	Lipid transport and metabolism	Myristoyl-CoA:protein N-myristoyltransferase, C-terminal domain;; Myristoyl-CoA:protein N-myristoyltransferase, N-terminal domain	Glycylpeptide N-tetradecanoyltransferase 1 OS=Arabidopsis thaliana OX=3702 GN=NMT1 PE=1 SV=2	Glycylpeptide N-tetradecanoyltransferase OS=Ensete ventricosum OX=4639 GN=GW17_00009292 PE=3 SV=1	PREDICTED: glycylpeptide N-tetradecanoyltransferase 1-like [Musa acuminata subsp. malaccensis]
XLOC_034647	[E]	Amino acid transport and metabolism	--	--	--	--	--	--	--	PREDICTED: uncharacterized protein LOC103969780 isoform X4 [Musa acuminata subsp. malaccensis]
Macma4_11_g04600	[R]	General function prediction only	Cellular Component: anaphase-promoting complex (GO:0005680);; Biological Process: regulation of mitotic metaphase/anaphase transition (GO:0030071);; Biological Process: regulation of defense response (GO:0031347);;	K03355|0|mus:103970403|(RefSeq) anaphase-promoting complex subunit 8; K03355 anaphase-promoting complex subunit 8	[DO]	--	Anaphase promoting complex subunit 8 / Cdc23;; Tetratricopeptide repeat;; Tetratricopeptide repeat;; Tetratricopeptide repeat;; Tetratricopeptide repeat;; Tetratricopeptide repeat;; TPR repeat;; Tetratricopeptide repeat;; Tetratricopeptide repeat;; Tetratricopeptide repeat;; Tetratricopeptide repeat;; Tetratricopeptide repeat;; Anaphase-promoting complex, cyclosome, subunit 3	Anaphase-promoting complex subunit 8 OS=Arabidopsis thaliana OX=3702 GN=APC8 PE=1 SV=1	Uncharacterized protein OS=Musa acuminata subsp. malaccensis OX=214687 GN=103970403 PE=4 SV=1	PREDICTED: anaphase-promoting complex subunit 8 [Musa acuminata subsp. malaccensis]
Macma4_05_g20550	--	--	--	K11000|0|mus:103985166|(RefSeq) callose synthase 5-like; K11000 callose synthase [EC:2.4.1.-]	[M]	Cell wall/membrane/envelope biogenesis	1,3-beta-glucan synthase component;; 1,3-beta-glucan synthase subunit FKS1, domain-1;; Vta1 like	Callose synthase 5 OS=Arabidopsis thaliana OX=3702 GN=CALS5 PE=1 SV=1	callose synthase 5 OS=Phoenix dactylifera OX=42345 GN=LOC103715871 PE=4 SV=1	unnamed protein product [Musa acuminata subsp. malaccensis]
Macma4_06_g00970	--	--	Cellular Component: integral component of membrane (GO:0016021);;	--	--	--	--	--	Uncharacterized protein OS=Musa acuminata subsp. malaccensis OX=214687 PE=4 SV=1	PREDICTED: uncharacterized protein LOC103971056 isoform X1 [Musa acuminata subsp. malaccensis]
Macma4_04_g20240	--	--	--	K06620|0|mus:103981949|(RefSeq) transcription factor E2FB-like isoform X1; K06620 transcription factor E2F3	[K]	Transcription	E2F transcription factor CC-MB domain;; E2F/DP family winged-helix DNA-binding domain	Transcription factor E2FB OS=Arabidopsis thaliana OX=3702 GN=E2FB PE=1 SV=1	Uncharacterized protein OS=Musa acuminata subsp. malaccensis OX=214687 PE=3 SV=1	hypothetical protein C4D60_Mb04t19330 [Musa balbisiana]
Macma4_01_g05300	--	--	Cellular Component: cilium (GO:0005929);; Molecular Function: phosphatidylinositol binding (GO:0035091);; Biological Process: protein localization to cilium (GO:0061512);;	K19600|4.37947e-91|cic:CICLE_v10001261mg|(RefSeq) hypothetical protein; K19600 tubby-related protein 1	[R]	General function prediction only	Tub family;; F-box domain	Tubby-like F-box protein 6 OS=Oryza sativa subsp. japonica OX=39947 GN=TULP6 PE=2 SV=1	Tubby-like F-box protein OS=Musa acuminata subsp. malaccensis OX=214687 GN=103988673 PE=3 SV=1	unnamed protein product [Musa acuminata subsp. malaccensis]
Macma4_11_g12240	--	--	Molecular Function: nucleotide-sugar transmembrane transporter activity (GO:0005338);; Biological Process: nucleotide-sugar transmembrane transport (GO:0015780);; Cellular Component: integral component of membrane (GO:0016021);; Biological Process: nucleotide transmembrane transport (GO:1901679);;	K15285|0|mus:103973342|(RefSeq) UDP-galactose transporter 2-like; K15285 solute carrier family 35, member E3	[GE]	--	Triose-phosphate Transporter family	UDP-rhamnose/UDP-galactose transporter 1 OS=Arabidopsis thaliana OX=3702 GN=URGT1 PE=1 SV=1	Uncharacterized protein OS=Musa acuminata subsp. malaccensis OX=214687 GN=103973342 PE=4 SV=1	PREDICTED: UDP-galactose transporter 2-like [Musa acuminata subsp. malaccensis]
Macma4_07_g20020	--	--	--	K16221|3.35888e-32|brp:103847150|(RefSeq) transcription factor TCP21-like; K16221 transcription factor TCP21 (protein CCA1 HIKING EXPEDITION)	--	--	TCP family transcription factor	Transcription factor TCP15 OS=Arabidopsis thaliana OX=3702 GN=TCP15 PE=1 SV=1	Uncharacterized protein OS=Musa acuminata subsp. malaccensis OX=214687 GN=103992127 PE=4 SV=1	PREDICTED: transcription factor TCP15 [Musa acuminata subsp. malaccensis]
Macma4_04_g42310	--	--	--	K14765|5.182e-30|mus:103982091|(RefSeq) neuroguidin isoform X1; K14765 U3 small nucleolar ribonucleoprotein protein LCP5	--	--	--	--	Uncharacterized protein OS=Musa acuminata subsp. malaccensis OX=214687 PE=4 SV=1	unnamed protein product [Musa acuminata subsp. malaccensis]
Macma4_10_g14940	[F]	Nucleotide transport and metabolism	--	K01945|0|mus:104000760|(RefSeq) phosphoribosylamine--glycine ligase-like isoform X2; K01945 phosphoribosylamine---glycine ligase [EC:6.3.4.13]	[F]	Nucleotide transport and metabolism	Phosphoribosylglycinamide synthetase, ATP-grasp (A) domain;; Phosphoribosylglycinamide synthetase, N domain;; Phosphoribosylglycinamide synthetase, C domain;; ATP-grasp domain;; Carbamoyl-phosphate synthase L chain, ATP binding domain	Phosphoribosylamine--glycine ligase, chloroplastic OS=Arabidopsis thaliana OX=3702 GN=PUR2 PE=2 SV=2	Phosphoribosylamine--glycine ligase, chloroplastic (Fragment) OS=Ananas comosus OX=4615 GN=ACMD2_05942 PE=3 SV=1	PREDICTED: phosphoribosylamine--glycine ligase-like isoform X1 [Musa acuminata subsp. malaccensis]
Macma4_01_g21880	[P]	Inorganic ion transport and metabolism	Molecular Function: secondary active sulfate transmembrane transporter activity (GO:0008271);; Cellular Component: chloroplast (GO:0009507);; Cellular Component: integral component of membrane (GO:0016021);; Biological Process: sulfate transmembrane transport (GO:1902358);;	K17471|0|mus:103999237|(RefSeq) sulfate transporter 3.1; K17471 sulfate transporter 3	[P]	Inorganic ion transport and metabolism	Sulfate permease family;; STAS domain	Sulfate transporter 3.1 OS=Arabidopsis thaliana OX=3702 GN=SULTR3;1 PE=2 SV=1	Uncharacterized protein OS=Musa acuminata subsp. malaccensis OX=214687 GN=103999237 PE=3 SV=1	PREDICTED: sulfate transporter 3.1 [Musa acuminata subsp. malaccensis]
Macma4_07_g29790	--	--	Biological Process: signal transduction (GO:0007165);;	K05747|3.8973e-21|vvi:104882322|(RefSeq) formin-like protein 5; K05747 Wiskott-Aldrich syndrome protein	--	--	Putative nuclear localisation signal;; Ethylene-responsive binding factor-associated repression;; Tify domain binding domain	Ninja-family protein AFP3 OS=Arabidopsis thaliana OX=3702 GN=AFP3 PE=1 SV=1	Uncharacterized protein OS=Musa acuminata subsp. malaccensis OX=214687 GN=103992923 PE=4 SV=1	PREDICTED: ninja-family protein AFP3-like [Musa acuminata subsp. malaccensis]
Macma4_10_g26030	--	--	Cellular Component: integral component of membrane (GO:0016021);;	--	--	--	Late embryogenesis abundant protein	--	Uncharacterized protein OS=Musa acuminata subsp. malaccensis OX=214687 GN=103968920 PE=4 SV=1	PREDICTED: uncharacterized protein LOC103968920 [Musa acuminata subsp. malaccensis]
Macma4_07_g26170	--	--	--	--	--	--	Peptidase inhibitor I9	Subtilisin-like protease SBT3.17 OS=Arabidopsis thaliana OX=3702 GN=SBT3.17 PE=3 SV=1	Uncharacterized protein OS=Musa acuminata subsp. malaccensis OX=214687 GN=103992610 PE=4 SV=1	PREDICTED: subtilisin-like protease SBT3.17 [Musa acuminata subsp. malaccensis]
Macma4_06_g28080	--	--	--	K15718|0|mus:103998404|(RefSeq) probable linoleate 9S-lipoxygenase 5; K15718 linoleate 9S-lipoxygenase [EC:1.13.11.58]	--	--	Lipoxygenase;; PLAT/LH2 domain	Linoleate 9S-lipoxygenase 6 (Fragment) OS=Solanum tuberosum OX=4113 GN=LOX1.6 PE=1 SV=1	Lipoxygenase OS=Ensete ventricosum OX=4639 GN=GW17_00026979 PE=3 SV=1	hypothetical protein C4D60_Mb06t26190 [Musa balbisiana]
Macma4_10_g22660	[O]	Posttranslational modification, protein turnover, chaperones	Molecular Function: threonine-type endopeptidase activity (GO:0004298);; Cellular Component: nucleus (GO:0005634);; Cellular Component: cytoplasm (GO:0005737);; Biological Process: ubiquitin-dependent protein catabolic process (GO:0006511);; Cellular Component: proteasome core complex, alpha-subunit complex (GO:0019773);;	K02729|3.9742e-175|mus:103968604|(RefSeq) proteasome subunit alpha type-5-like; K02729 20S proteasome subunit alpha 5 [EC:3.4.25.1]	[O]	Posttranslational modification, protein turnover, chaperones	Proteasome subunit;; Proteasome subunit A N-terminal signature	Proteasome subunit alpha type-5 OS=Glycine max OX=3847 GN=PAE1 PE=2 SV=1	Proteasome subunit alpha type OS=Musa acuminata subsp. malaccensis OX=214687 GN=103968604 PE=3 SV=1	PREDICTED: proteasome subunit alpha type-5-like [Musa acuminata subsp. malaccensis]
Macma4_05_g18540	[K]	Transcription	Cellular Component: nucleus (GO:0005634);; Biological Process: transcription by RNA polymerase II (GO:0006366);; Biological Process: embryo development ending in seed dormancy (GO:0009793);; Biological Process: endosperm development (GO:0009960);; Molecular Function: protein heterodimerization activity (GO:0046982);;	K03127|2.81786e-86|mus:103974210|(RefSeq) transcription initiation factor TFIID subunit 13; K03127 transcription initiation factor TFIID subunit 13	[K]	Transcription	Transcription initiation factor IID, 18kD subunit	Transcription initiation factor TFIID subunit 13 OS=Arabidopsis thaliana OX=3702 GN=TAF13 PE=1 SV=1	Uncharacterized protein OS=Musa acuminata subsp. malaccensis OX=214687 GN=103974210 PE=4 SV=1	PREDICTED: transcription initiation factor TFIID subunit 13 [Musa acuminata subsp. malaccensis]
Macma4_01_g20050	--	--	--	--	[S]	Function unknown	Tumour-associated protein	Membralin-like protein At1g60995 OS=Arabidopsis thaliana OX=3702 GN=At1g60995 PE=2 SV=1	Uncharacterized protein OS=Musa acuminata subsp. malaccensis OX=214687 PE=4 SV=1	PREDICTED: uncharacterized protein LOC103974813 [Musa acuminata subsp. malaccensis]
Macma4_03_g27240	--	--	--	--	--	--	--	--	Uncharacterized protein OS=Musa acuminata subsp. malaccensis OX=214687 PE=4 SV=1	PREDICTED: uncharacterized protein LOC103978912 [Musa acuminata subsp. malaccensis]
Macma4_06_g34720	[H]	Coenzyme transport and metabolism	--	K03644|0|mus:103989573|(RefSeq) lipoyl synthase 1, chloroplastic; K03644 lipoyl synthase [EC:2.8.1.8]	[H]	Coenzyme transport and metabolism	Radical SAM superfamily;; N-terminal domain of lipoyl synthase of Radical_SAM family	Lipoyl synthase, chloroplastic OS=Ricinus communis OX=3988 GN=LIP1P PE=3 SV=1	Lipoyl synthase, chloroplastic OS=Dendrobium catenatum OX=906689 GN=LIP1P PE=3 SV=1	hypothetical protein C4D60_Mb06t32180 [Musa balbisiana]
Macma4_10_g28010	--	--	--	K15032|0|mus:103969114|(RefSeq) transcription termination factor MTERF6, chloroplastic/mitochondrial-like; K15032 mTERF domain-containing protein, mitochondrial	[KR]	--	mTERF	Transcription termination factor MTERF15, mitochondrial OS=Arabidopsis thaliana OX=3702 GN=MTERF15 PE=2 SV=1	Uncharacterized protein OS=Ensete ventricosum OX=4639 GN=GW17_00024878 PE=4 SV=1	PREDICTED: transcription termination factor MTERF6, chloroplastic/mitochondrial-like [Musa acuminata subsp. malaccensis]
Macma4_09_g01460	[F]	Nucleotide transport and metabolism	--	K10808|0|mus:103996665|(RefSeq) ribonucleoside-diphosphate reductase small chain-like; K10808 ribonucleoside-diphosphate reductase subunit M2 [EC:1.17.4.1]	[F]	Nucleotide transport and metabolism	Ribonucleotide reductase, small chain	Ribonucleoside-diphosphate reductase small chain OS=Nicotiana tabacum OX=4097 PE=2 SV=1	Uncharacterized protein OS=Ensete ventricosum OX=4639 GN=B296_00033737 PE=4 SV=1	hypothetical protein C4D60_Mb09t01360 [Musa balbisiana]
Macma4_07_g19740	--	--	Biological Process: lipid metabolic process (GO:0006629);; Molecular Function: phosphoric diester hydrolase activity (GO:0008081);;	--	[T]	Signal transduction mechanisms	Phosphatidylinositol-specific phospholipase C, X domain	PI-PLC X-box domain-containing protein DDB_G0293730 OS=Dictyostelium discoideum OX=44689 GN=DDB_G0293730 PE=4 SV=2	Uncharacterized protein OS=Ensete ventricosum OX=4639 GN=GW17_00018139 PE=4 SV=1	PREDICTED: uncharacterized protein LOC103973365 [Musa acuminata subsp. malaccensis]
Macma4_08_g22540	[I]	Lipid transport and metabolism	Biological Process: lipid metabolic process (GO:0006629);; Cellular Component: integral component of membrane (GO:0016021);; Molecular Function: oxidoreductase activity, acting on paired donors, with oxidation of a pair of donors resulting in the reduction of molecular oxygen to two molecules of water (GO:0016717);; Biological Process: oxidation-reduction process (GO:0055114);;	K10257|0|mus:103995423|(RefSeq) omega-3 fatty acid desaturase, chloroplastic; K10257 acyl-lipid omega-3 desaturase [EC:1.14.19.36]	--	--	Domain of unknown function (DUF3474);; Fatty acid desaturase	Omega-3 fatty acid desaturase, chloroplastic OS=Sesamum indicum OX=4182 GN=FAD7 PE=2 SV=1	Omega-3 fatty acid desaturase 7-1 OS=Musa acuminata AAA Group OX=214697 PE=2 SV=1	PREDICTED: omega-3 fatty acid desaturase, chloroplastic [Musa acuminata subsp. malaccensis]
Macma4_02_g08760	--	--	Molecular Function: metal ion binding (GO:0046872);;	K03260|3.45683e-26|osa:4341164|(RefSeq) zinc finger CCCH domain-containing protein 43; K03260 translation initiation factor 4G	[R]	General function prediction only	Zinc finger C-x8-C-x5-C-x3-H type (and similar);; Zinc finger domain;; CCCH-type zinc finger;; RNA-binding, Nab2-type zinc finger;; Torus domain	Zinc finger CCCH domain-containing protein ZFN-like OS=Pisum sativum OX=3888 PE=2 SV=1	Uncharacterized protein OS=Musa acuminata subsp. malaccensis OX=214687 GN=103972608 PE=4 SV=1	PREDICTED: zinc finger CCCH domain-containing protein 33-like [Musa acuminata subsp. malaccensis]
Macma4_09_g17250	--	--	--	--	--	--	F-box-like;; F-box domain	--	Uncharacterized protein OS=Musa acuminata subsp. malaccensis OX=214687 GN=103998242 PE=4 SV=1	hypothetical protein C4D60_Mb09t15600 [Musa balbisiana]
Macma4_09_g26620	--	--	--	--	--	--	Protein of unknown function, DUF538	--	Uncharacterized protein OS=Musa acuminata subsp. malaccensis OX=214687 PE=4 SV=1	PREDICTED: uncharacterized protein LOC103998875 [Musa acuminata subsp. malaccensis]
Macma4_11_g04740	[RTKL]	--	Molecular Function: protein serine/threonine kinase activity (GO:0004674);; Molecular Function: ATP binding (GO:0005524);; Biological Process: protein phosphorylation (GO:0006468);;	K13436|0|mus:103970418|(RefSeq) pto-interacting protein 1-like; K13436 pto-interacting protein 1 [EC:2.7.11.1]	[T]	Signal transduction mechanisms	Protein tyrosine and serine/threonine kinase;; Protein kinase domain	Pto-interacting protein 1 OS=Solanum lycopersicum OX=4081 GN=PTI1 PE=1 SV=2	Uncharacterized protein OS=Musa acuminata subsp. malaccensis OX=214687 GN=103970418 PE=3 SV=1	hypothetical protein C4D60_Mb11t04500 [Musa balbisiana]
Macma4_10_g06360	[RTKL]	--	--	K13414|0|mus:103999777|(RefSeq) mitogen-activated protein kinase kinase kinase 1-like; K13414 mitogen-activated protein kinase kinase kinase 1 [EC:2.7.11.25]	[T]	Signal transduction mechanisms	Protein kinase domain;; Protein tyrosine and serine/threonine kinase	Mitogen-activated protein kinase kinase kinase 1 OS=Arabidopsis thaliana OX=3702 GN=MEKK1 PE=1 SV=2	Uncharacterized protein OS=Musa acuminata subsp. malaccensis OX=214687 PE=4 SV=1	PREDICTED: mitogen-activated protein kinase kinase kinase 1-like [Musa acuminata subsp. malaccensis]
Macma4_08_g30770	--	--	Molecular Function: GTP binding (GO:0005525);;	--	--	--	AIG1 family;; 50S ribosome-binding GTPase	Immune-associated nucleotide-binding protein 9 OS=Arabidopsis thaliana OX=3702 GN=IAN9 PE=2 SV=1	Uncharacterized protein OS=Musa acuminata subsp. malaccensis OX=214687 GN=103997461 PE=4 SV=1	PREDICTED: protein AIG1-like [Musa acuminata subsp. malaccensis]
Macma4_04_g26240	--	--	Cellular Component: integral component of membrane (GO:0016021);;	--	--	--	--	--	Uncharacterized protein OS=Musa acuminata subsp. malaccensis OX=214687 GN=103975481 PE=4 SV=1	PREDICTED: uncharacterized protein LOC103975481 [Musa acuminata subsp. malaccensis]
Macma4_06_g33500	[R]	General function prediction only	--	K14298|0|mus:103989483|(RefSeq) protein RAE1; K14298 mRNA export factor	[A]	RNA processing and modification	WD domain, G-beta repeat;; Anaphase-promoting complex subunit 4 WD40 domain	Protein RAE1 OS=Arabidopsis thaliana OX=3702 GN=RAE1 PE=1 SV=2	Uncharacterized protein OS=Musa acuminata subsp. malaccensis OX=214687 PE=4 SV=1	unnamed protein product [Musa acuminata subsp. malaccensis]
Macma4_08_g32230	--	--	--	--	--	--	--	--	--	hypothetical protein C4D60_Mb08t30830 [Musa balbisiana]
Macma4_11_g05970	--	--	--	K14431|1.61753e-35|aly:ARALYDRAFT_311885|(RefSeq) T27G7.2; K14431 transcription factor TGA	[S]	Function unknown	Armadillo/beta-catenin-like repeat	--	Uncharacterized protein OS=Ensete ventricosum OX=4639 GN=GW17_00042679 PE=4 SV=1	PREDICTED: U-box domain-containing protein 11-like [Musa acuminata subsp. malaccensis]
Macma4_09_g06410	--	--	--	K04908|2.76681e-172|vra:106763693|(RefSeq) potassium channel AKT1; K21867 potassium channel	[PT]	--	Ion transport protein;; KHA, dimerisation domain of potassium ion channel;; Cyclic nucleotide-binding domain;; Ion channel	Potassium channel KAT1 OS=Arabidopsis thaliana OX=3702 GN=KAT1 PE=1 SV=2	Uncharacterized protein OS=Musa acuminata subsp. malaccensis OX=214687 PE=4 SV=1	hypothetical protein C4D60_Mb09t05770 [Musa balbisiana]
Macma4_07_g19000	--	--	--	K19090|3.90905e-104|fve:101300361|(RefSeq) putative pentatricopeptide repeat-containing protein At3g05240; K19090 CRISPR-associated protein Cas5t	[R]	General function prediction only	PPR repeat family;; PPR repeat;; PPR repeat;; Pentatricopeptide repeat domain;; Pentacotripeptide-repeat region of PRORP;; Tetratricopeptide repeat	Pentatricopeptide repeat-containing protein At3g29230 OS=Arabidopsis thaliana OX=3702 GN=PCMP-E27 PE=2 SV=1	Uncharacterized protein OS=Ensete ventricosum OX=4639 GN=GW17_00051632 PE=4 SV=1	PREDICTED: pentatricopeptide repeat-containing protein At3g29230-like isoform X1 [Musa acuminata subsp. malaccensis]
Macma4_02_g09710	[H]	Coenzyme transport and metabolism	--	K08337|0|mus:103973404|(RefSeq) ubiquitin-like modifier-activating enzyme atg7; K08337 ubiquitin-like modifier-activating enzyme ATG7	[H]	Coenzyme transport and metabolism	Ubiquitin-like modifier-activating enzyme ATG7 N-terminus;; ThiF family	Ubiquitin-like modifier-activating enzyme atg7 OS=Arabidopsis thaliana OX=3702 GN=ATG7 PE=1 SV=1	Uncharacterized protein OS=Musa acuminata subsp. malaccensis OX=214687 PE=4 SV=1	PREDICTED: ubiquitin-like modifier-activating enzyme atg7 [Musa acuminata subsp. malaccensis]
Macma4_08_g25600	[G]	Carbohydrate transport and metabolism	--	K00703|0|mus:103981083|(RefSeq) granule-bound starch synthase 2, chloroplastic/amyloplastic; K00703 starch synthase [EC:2.4.1.21]	--	--	Starch synthase catalytic domain;; Glycosyl transferases group 1;; Glycosyl transferases group 1	Granule-bound starch synthase 2, chloroplastic/amyloplastic OS=Solanum tuberosum OX=4113 GN=SS2 PE=1 SV=3	Starch synthase, chloroplastic/amyloplastic OS=Musa acuminata subsp. malaccensis OX=214687 PE=3 SV=1	unnamed protein product, partial [Musa acuminata subsp. malaccensis]
[truncated: 37,594 more rows]

## Sheet: Table S4
Table S4 Statistics of function annotation
Anno_Database	Annotated_Number	300<=length<1000	length>=1000
COG	11942	2329	9410
GO	13604	4170	8938
KEGG	24866	5895	18167
[truncated: 6 more rows]

## Sheet: Table S5
Table S5 The DEGs in G1T0 vs G1T3
[truncated: 89 more rows]

[truncated: 18 more sheets: Table S6, Table S7, Table S8, Table S9, Table S10, Table S11, Table S12, Table S13, Table S14, Table S15, Table S16, Table S17, Table S18, Table S19, Table S20, Table S21, Table S22, Table S23]
